# Supplementary material for: Association of CMV genomic mutations with symptomatic infection and hearing loss in congenital CMV infection
Source: BMC Infect Dis. 2019 Dec 10;19:1046. doi: 10.1186/s12879-019-4681-0 (PMC6905059; doi:10.1186/s12879-019-4681-0)
Supplement: Supplementary file 4 — Additional file 4: Table S3. Table of CMV variants more common in symptomatic children. The accession number prefix is listed; and nomenclature used for reporting is taken from http://www.hgvs.org/mutnomen/. [file 12879_2019_4681_MOESM4_ESM.xlsx]

## Sheet: Fisher_17sym_13_asym_rm_bar...
Supplemental Table 3. Table of CMV variants significantly more common in symptomatic children. The accession number prefix is listed; and nomenclature used for reporting is taken from http://www.hgvs.org/mutnomen/.
Region	Type	Reference	Allele	P-value	Sample count (case)	Total number of samples (case)	Sample frequency (case)	Sample count (control)	Total number of samples (control)	Sample frequency (control)	Amino acid change	Non-synonymous	gene (AY446894 (CDS))	locus_tag (AY446894 (CDS))	note (AY446894 (CDS))	product (AY446894 (CDS))	Protein id (AY446894 (CDS))	GI (AY446894 (CDS))	translation (AY446894 (CDS))
2082	SNV	C	T	0.0278761	10	13	76.9231	6	17	35.2941	AAR31561.1:p.Thr239Ile	Yes	RL1	HHV5wtgp001	RL1 family	protein RL1	AAR31561.1	GI:39842017	MPATDTNSTHTTPLHPEDQHTLPLHHSTTQPHVQTSDKHADKQH RTQMELDAADYAACAQARQHLYGQTQPQLHAYPNANPQESAHFRTENQHQLTNLLHNI GEGAALGYPVPRAEIRRGGGDWADSASDFDADCWCMWGRFGTMGRQPVVTLLLARQRD GLADWNVVRCRGTGFRAHDSEDGVSVWRQHLVFLLGGHGRRVQLERPSAGEAQARGLL PRIRITPISTSPRPKPPQPTTSTASHPHATARPDHTLFPVPSTPSATVHNPRNYAVQL HAETTRTWRWARRGERGAWMPAETFTCPKDKRPW
6460	SNV	A	G	0.0208429	13	13	100	11	17	64.7059		-
6474	SNV	G	A	0.0208429	13	13	100	11	17	64.7059		-
6518	SNV	C	A	0.01947	11	13	84.6154	7	17	41.1765		-
6598	SNV	T	C	0.0111658	12	13	92.3077	8	17	47.0588		-
7511	Deletion	C	-	0.0395659	11	13	84.6154	8	17	47.0588		-
7528^7529	Insertion	-	C	0.00875212	11	13	84.6154	6	17	35.2941		-
7813	SNV	A	G	0.0473497	12	13	92.3077	10	17	58.8235		-
7815	SNV	C	T	0.0278761	10	13	76.9231	6	17	35.2941		-
7833	SNV	T	C	0.00415348	13	13	100	9	17	52.9412		-
8036	SNV	G	A	0.0237881	12	13	92.3077	9	17	52.9412	AEJ33666.1:p.Ala50Val	Yes	RL8A	HHV5wtgr003	contains potential transmembrane domain	protein RL8A	AEJ33666.1	GI:338970386	MPHGHLRQALSPTSWTCEGLLLLLGLLVLFFHHHNQSAVERRRR VSFVEADRLPHESGWYSSDDDGDRDGDEETGESHNRNSVGLSAVFS
8068	SNV	C	T	0.009553	13	13	100	10	17	58.8235		No	RL8A	HHV5wtgr003	contains potential transmembrane domain	protein RL8A	AEJ33666.1	GI:338970386	MPHGHLRQALSPTSWTCEGLLLLLGLLVLFFHHHNQSAVERRRR VSFVEADRLPHESGWYSSDDDGDRDGDEETGESHNRNSVGLSAVFS
8230	SNV	G	A	0.00608643	9	13	69.2308	3	17	17.6471		-
8764	SNV	A	G	0.0260901	4	13	30.7692	0	17	0	AAR31564.1:p.Asn55Ser	Yes	RL10	HHV5wtgp004	type 1 membrane protein; possibly related to RL11 family	envelope glycoprotein RL10	AAR31564.1	GI:39842020	MYPRVMHAVCFLALGLISYVAVCAENTVTTNCLVKAENTHLTCK CNPNTTSNTNNGSKCHAMCKCRVTEPITMLGAYSAWGAGSFVATLIVLLVVFFVIYAR EEEKNNTGTEVDQCLAYRSLTRKKLEQHAAKKQNIYERIPYRPSRQNDNSPLIEPTGT DDEEDEDDDV
17885	SNV	G	A	0.0450775	6	13	46.1538	2	17	11.7647	AAR31576.1:p.Arg37Lys	Yes	UL10	HHV5wtgp016	type 1 membrane protein; RL11 family	membrane protein UL10	AAR31576.1	GI:39842032	MRQLINHIVNHDLFRWSVVTAMIFYRYSETCMEVTVRVGDPVTL GSGHGYHPGQKVHWYNQSCVGIGNGENTHPICTYDPPKPGRQKTMKTTPLPSPLLYEC HNSTLSILHVNVSDPRNYCRRKCPPKGNCEFPTCFTLSLISRTTTRKPEQKTTLLRLK TTPNKHTQHKRSTRRTSPKDYNVTGLPKGFADSFTGNVEAHRTKDAAHSAWILIIIII IIVVILFFFKIPQRLREKWDTKGYLYKGTDGLPTTD
17900	SNV	T	C	0.0397373	5	13	38.4615	1	17	5.88235	AAR31576.1:p.Val42Ala	Yes	UL10	HHV5wtgp016	type 1 membrane protein; RL11 family	membrane protein UL10	AAR31576.1	GI:39842032	MRQLINHIVNHDLFRWSVVTAMIFYRYSETCMEVTVRVGDPVTL GSGHGYHPGQKVHWYNQSCVGIGNGENTHPICTYDPPKPGRQKTMKTTPLPSPLLYEC HNSTLSILHVNVSDPRNYCRRKCPPKGNCEFPTCFTLSLISRTTTRKPEQKTTLLRLK TTPNKHTQHKRSTRRTSPKDYNVTGLPKGFADSFTGNVEAHRTKDAAHSAWILIIIII IIVVILFFFKIPQRLREKWDTKGYLYKGTDGLPTTD
17903	SNV	C	T	0.0397373	5	13	38.4615	1	17	5.88235	AAR31576.1:p.Thr43Ile	Yes	UL10	HHV5wtgp016	type 1 membrane protein; RL11 family	membrane protein UL10	AAR31576.1	GI:39842032	MRQLINHIVNHDLFRWSVVTAMIFYRYSETCMEVTVRVGDPVTL GSGHGYHPGQKVHWYNQSCVGIGNGENTHPICTYDPPKPGRQKTMKTTPLPSPLLYEC HNSTLSILHVNVSDPRNYCRRKCPPKGNCEFPTCFTLSLISRTTTRKPEQKTTLLRLK TTPNKHTQHKRSTRRTSPKDYNVTGLPKGFADSFTGNVEAHRTKDAAHSAWILIIIII IIVVILFFFKIPQRLREKWDTKGYLYKGTDGLPTTD
17910	SNV	T	C	0.0397373	5	13	38.4615	1	17	5.88235		No	UL10	HHV5wtgp016	type 1 membrane protein; RL11 family	membrane protein UL10	AAR31576.1	GI:39842032	MRQLINHIVNHDLFRWSVVTAMIFYRYSETCMEVTVRVGDPVTL GSGHGYHPGQKVHWYNQSCVGIGNGENTHPICTYDPPKPGRQKTMKTTPLPSPLLYEC HNSTLSILHVNVSDPRNYCRRKCPPKGNCEFPTCFTLSLISRTTTRKPEQKTTLLRLK TTPNKHTQHKRSTRRTSPKDYNVTGLPKGFADSFTGNVEAHRTKDAAHSAWILIIIII IIVVILFFFKIPQRLREKWDTKGYLYKGTDGLPTTD
17919	SNV	T	C	0.0450775	6	13	46.1538	2	17	11.7647		No	UL10	HHV5wtgp016	type 1 membrane protein; RL11 family	membrane protein UL10	AAR31576.1	GI:39842032	MRQLINHIVNHDLFRWSVVTAMIFYRYSETCMEVTVRVGDPVTL GSGHGYHPGQKVHWYNQSCVGIGNGENTHPICTYDPPKPGRQKTMKTTPLPSPLLYEC HNSTLSILHVNVSDPRNYCRRKCPPKGNCEFPTCFTLSLISRTTTRKPEQKTTLLRLK TTPNKHTQHKRSTRRTSPKDYNVTGLPKGFADSFTGNVEAHRTKDAAHSAWILIIIII IIVVILFFFKIPQRLREKWDTKGYLYKGTDGLPTTD
17955	SNV	C	T	0.0450775	6	13	46.1538	2	17	11.7647		No	UL10	HHV5wtgp016	type 1 membrane protein; RL11 family	membrane protein UL10	AAR31576.1	GI:39842032	MRQLINHIVNHDLFRWSVVTAMIFYRYSETCMEVTVRVGDPVTL GSGHGYHPGQKVHWYNQSCVGIGNGENTHPICTYDPPKPGRQKTMKTTPLPSPLLYEC HNSTLSILHVNVSDPRNYCRRKCPPKGNCEFPTCFTLSLISRTTTRKPEQKTTLLRLK TTPNKHTQHKRSTRRTSPKDYNVTGLPKGFADSFTGNVEAHRTKDAAHSAWILIIIII IIVVILFFFKIPQRLREKWDTKGYLYKGTDGLPTTD
17964	SNV	C	T	0.0450775	6	13	46.1538	2	17	11.7647		No	UL10	HHV5wtgp016	type 1 membrane protein; RL11 family	membrane protein UL10	AAR31576.1	GI:39842032	MRQLINHIVNHDLFRWSVVTAMIFYRYSETCMEVTVRVGDPVTL GSGHGYHPGQKVHWYNQSCVGIGNGENTHPICTYDPPKPGRQKTMKTTPLPSPLLYEC HNSTLSILHVNVSDPRNYCRRKCPPKGNCEFPTCFTLSLISRTTTRKPEQKTTLLRLK TTPNKHTQHKRSTRRTSPKDYNVTGLPKGFADSFTGNVEAHRTKDAAHSAWILIIIII IIVVILFFFKIPQRLREKWDTKGYLYKGTDGLPTTD
17978	SNV	A	G	0.0397373	5	13	38.4615	1	17	5.88235	AAR31576.1:p.Asn68Ser	Yes	UL10	HHV5wtgp016	type 1 membrane protein; RL11 family	membrane protein UL10	AAR31576.1	GI:39842032	MRQLINHIVNHDLFRWSVVTAMIFYRYSETCMEVTVRVGDPVTL GSGHGYHPGQKVHWYNQSCVGIGNGENTHPICTYDPPKPGRQKTMKTTPLPSPLLYEC HNSTLSILHVNVSDPRNYCRRKCPPKGNCEFPTCFTLSLISRTTTRKPEQKTTLLRLK TTPNKHTQHKRSTRRTSPKDYNVTGLPKGFADSFTGNVEAHRTKDAAHSAWILIIIII IIVVILFFFKIPQRLREKWDTKGYLYKGTDGLPTTD
17988..17990	MNV	TAC	CGT	0.0397373	5	13	38.4615	1	17	5.88235	AAR31576.1:p.Thr72Val	Yes	UL10	HHV5wtgp016	type 1 membrane protein; RL11 family	membrane protein UL10	AAR31576.1	GI:39842032	MRQLINHIVNHDLFRWSVVTAMIFYRYSETCMEVTVRVGDPVTL GSGHGYHPGQKVHWYNQSCVGIGNGENTHPICTYDPPKPGRQKTMKTTPLPSPLLYEC HNSTLSILHVNVSDPRNYCRRKCPPKGNCEFPTCFTLSLISRTTTRKPEQKTTLLRLK TTPNKHTQHKRSTRRTSPKDYNVTGLPKGFADSFTGNVEAHRTKDAAHSAWILIIIII IIVVILFFFKIPQRLREKWDTKGYLYKGTDGLPTTD
17992	SNV	C	A	0.0397373	5	13	38.4615	1	17	5.88235	AAR31576.1:p.His73Asn	Yes	UL10	HHV5wtgp016	type 1 membrane protein; RL11 family	membrane protein UL10	AAR31576.1	GI:39842032	MRQLINHIVNHDLFRWSVVTAMIFYRYSETCMEVTVRVGDPVTL GSGHGYHPGQKVHWYNQSCVGIGNGENTHPICTYDPPKPGRQKTMKTTPLPSPLLYEC HNSTLSILHVNVSDPRNYCRRKCPPKGNCEFPTCFTLSLISRTTTRKPEQKTTLLRLK TTPNKHTQHKRSTRRTSPKDYNVTGLPKGFADSFTGNVEAHRTKDAAHSAWILIIIII IIVVILFFFKIPQRLREKWDTKGYLYKGTDGLPTTD
18033	SNV	A	T	0.0397373	5	13	38.4615	1	17	5.88235	AAR31576.1:p.Gln86His	Yes	UL10	HHV5wtgp016	type 1 membrane protein; RL11 family	membrane protein UL10	AAR31576.1	GI:39842032	MRQLINHIVNHDLFRWSVVTAMIFYRYSETCMEVTVRVGDPVTL GSGHGYHPGQKVHWYNQSCVGIGNGENTHPICTYDPPKPGRQKTMKTTPLPSPLLYEC HNSTLSILHVNVSDPRNYCRRKCPPKGNCEFPTCFTLSLISRTTTRKPEQKTTLLRLK TTPNKHTQHKRSTRRTSPKDYNVTGLPKGFADSFTGNVEAHRTKDAAHSAWILIIIII IIVVILFFFKIPQRLREKWDTKGYLYKGTDGLPTTD
18038..18039	MNV	CA	TG	0.0397373	5	13	38.4615	1	17	5.88235	AAR31576.1:p.Thr88Met	Yes	UL10	HHV5wtgp016	type 1 membrane protein; RL11 family	membrane protein UL10	AAR31576.1	GI:39842032	MRQLINHIVNHDLFRWSVVTAMIFYRYSETCMEVTVRVGDPVTL GSGHGYHPGQKVHWYNQSCVGIGNGENTHPICTYDPPKPGRQKTMKTTPLPSPLLYEC HNSTLSILHVNVSDPRNYCRRKCPPKGNCEFPTCFTLSLISRTTTRKPEQKTTLLRLK TTPNKHTQHKRSTRRTSPKDYNVTGLPKGFADSFTGNVEAHRTKDAAHSAWILIIIII IIVVILFFFKIPQRLREKWDTKGYLYKGTDGLPTTD
18055..18056	MNV	TT	CC	0.0397373	5	13	38.4615	1	17	5.88235	AAR31576.1:p.Leu94Pro	Yes	UL10	HHV5wtgp016	type 1 membrane protein; RL11 family	membrane protein UL10	AAR31576.1	GI:39842032	MRQLINHIVNHDLFRWSVVTAMIFYRYSETCMEVTVRVGDPVTL GSGHGYHPGQKVHWYNQSCVGIGNGENTHPICTYDPPKPGRQKTMKTTPLPSPLLYEC HNSTLSILHVNVSDPRNYCRRKCPPKGNCEFPTCFTLSLISRTTTRKPEQKTTLLRLK TTPNKHTQHKRSTRRTSPKDYNVTGLPKGFADSFTGNVEAHRTKDAAHSAWILIIIII IIVVILFFFKIPQRLREKWDTKGYLYKGTDGLPTTD
18067..18068	MNV	TT	CC	0.0397373	5	13	38.4615	1	17	5.88235	AAR31576.1:p.Leu98Pro	Yes	UL10	HHV5wtgp016	type 1 membrane protein; RL11 family	membrane protein UL10	AAR31576.1	GI:39842032	MRQLINHIVNHDLFRWSVVTAMIFYRYSETCMEVTVRVGDPVTL GSGHGYHPGQKVHWYNQSCVGIGNGENTHPICTYDPPKPGRQKTMKTTPLPSPLLYEC HNSTLSILHVNVSDPRNYCRRKCPPKGNCEFPTCFTLSLISRTTTRKPEQKTTLLRLK TTPNKHTQHKRSTRRTSPKDYNVTGLPKGFADSFTGNVEAHRTKDAAHSAWILIIIII IIVVILFFFKIPQRLREKWDTKGYLYKGTDGLPTTD
18084	SNV	C	T	0.0397373	5	13	38.4615	1	17	5.88235		No	UL10	HHV5wtgp016	type 1 membrane protein; RL11 family	membrane protein UL10	AAR31576.1	GI:39842032	MRQLINHIVNHDLFRWSVVTAMIFYRYSETCMEVTVRVGDPVTL GSGHGYHPGQKVHWYNQSCVGIGNGENTHPICTYDPPKPGRQKTMKTTPLPSPLLYEC HNSTLSILHVNVSDPRNYCRRKCPPKGNCEFPTCFTLSLISRTTTRKPEQKTTLLRLK TTPNKHTQHKRSTRRTSPKDYNVTGLPKGFADSFTGNVEAHRTKDAAHSAWILIIIII IIVVILFFFKIPQRLREKWDTKGYLYKGTDGLPTTD
18090	SNV	C	T	0.0397373	5	13	38.4615	1	17	5.88235		No	UL10	HHV5wtgp016	type 1 membrane protein; RL11 family	membrane protein UL10	AAR31576.1	GI:39842032	MRQLINHIVNHDLFRWSVVTAMIFYRYSETCMEVTVRVGDPVTL GSGHGYHPGQKVHWYNQSCVGIGNGENTHPICTYDPPKPGRQKTMKTTPLPSPLLYEC HNSTLSILHVNVSDPRNYCRRKCPPKGNCEFPTCFTLSLISRTTTRKPEQKTTLLRLK TTPNKHTQHKRSTRRTSPKDYNVTGLPKGFADSFTGNVEAHRTKDAAHSAWILIIIII IIVVILFFFKIPQRLREKWDTKGYLYKGTDGLPTTD
18102	SNV	T	C	0.0397373	5	13	38.4615	1	17	5.88235		No	UL10	HHV5wtgp016	type 1 membrane protein; RL11 family	membrane protein UL10	AAR31576.1	GI:39842032	MRQLINHIVNHDLFRWSVVTAMIFYRYSETCMEVTVRVGDPVTL GSGHGYHPGQKVHWYNQSCVGIGNGENTHPICTYDPPKPGRQKTMKTTPLPSPLLYEC HNSTLSILHVNVSDPRNYCRRKCPPKGNCEFPTCFTLSLISRTTTRKPEQKTTLLRLK TTPNKHTQHKRSTRRTSPKDYNVTGLPKGFADSFTGNVEAHRTKDAAHSAWILIIIII IIVVILFFFKIPQRLREKWDTKGYLYKGTDGLPTTD
18189^18190	Insertion	-	G	0.0397373	5	13	38.4615	1	17	5.88235	AAR31576.1:p.Leu139fs	Yes	UL10	HHV5wtgp016	type 1 membrane protein; RL11 family	membrane protein UL10	AAR31576.1	GI:39842032	MRQLINHIVNHDLFRWSVVTAMIFYRYSETCMEVTVRVGDPVTL GSGHGYHPGQKVHWYNQSCVGIGNGENTHPICTYDPPKPGRQKTMKTTPLPSPLLYEC HNSTLSILHVNVSDPRNYCRRKCPPKGNCEFPTCFTLSLISRTTTRKPEQKTTLLRLK TTPNKHTQHKRSTRRTSPKDYNVTGLPKGFADSFTGNVEAHRTKDAAHSAWILIIIII IIVVILFFFKIPQRLREKWDTKGYLYKGTDGLPTTD
18198	SNV	G	T	0.0397373	5	13	38.4615	1	17	5.88235		No	UL10	HHV5wtgp016	type 1 membrane protein; RL11 family	membrane protein UL10	AAR31576.1	GI:39842032	MRQLINHIVNHDLFRWSVVTAMIFYRYSETCMEVTVRVGDPVTL GSGHGYHPGQKVHWYNQSCVGIGNGENTHPICTYDPPKPGRQKTMKTTPLPSPLLYEC HNSTLSILHVNVSDPRNYCRRKCPPKGNCEFPTCFTLSLISRTTTRKPEQKTTLLRLK TTPNKHTQHKRSTRRTSPKDYNVTGLPKGFADSFTGNVEAHRTKDAAHSAWILIIIII IIVVILFFFKIPQRLREKWDTKGYLYKGTDGLPTTD
18242..18245	MNV	TGTT	CACC	0.0397373	5	13	38.4615	1	17	5.88235	AAR31576.1:p.Leu156_Leu157delinsSerPro	Yes	UL10	HHV5wtgp016	type 1 membrane protein; RL11 family	membrane protein UL10	AAR31576.1	GI:39842032	MRQLINHIVNHDLFRWSVVTAMIFYRYSETCMEVTVRVGDPVTL GSGHGYHPGQKVHWYNQSCVGIGNGENTHPICTYDPPKPGRQKTMKTTPLPSPLLYEC HNSTLSILHVNVSDPRNYCRRKCPPKGNCEFPTCFTLSLISRTTTRKPEQKTTLLRLK TTPNKHTQHKRSTRRTSPKDYNVTGLPKGFADSFTGNVEAHRTKDAAHSAWILIIIII IIVVILFFFKIPQRLREKWDTKGYLYKGTDGLPTTD
18276	SNV	G	A	0.0397373	5	13	38.4615	1	17	5.88235		No	UL10	HHV5wtgp016	type 1 membrane protein; RL11 family	membrane protein UL10	AAR31576.1	GI:39842032	MRQLINHIVNHDLFRWSVVTAMIFYRYSETCMEVTVRVGDPVTL GSGHGYHPGQKVHWYNQSCVGIGNGENTHPICTYDPPKPGRQKTMKTTPLPSPLLYEC HNSTLSILHVNVSDPRNYCRRKCPPKGNCEFPTCFTLSLISRTTTRKPEQKTTLLRLK TTPNKHTQHKRSTRRTSPKDYNVTGLPKGFADSFTGNVEAHRTKDAAHSAWILIIIII IIVVILFFFKIPQRLREKWDTKGYLYKGTDGLPTTD
20259	SNV	A	G	0.0278761	10	13	76.9231	6	17	35.2941	AAR31578.1:p.His201Arg	Yes	UL13	HHV5wtgp018	contains signal peptide	protein UL13	AAR31578.1	GI:39842034	MLWAHCGRFLRYHLLPLLLCRLPFLLFFQRPQWAHGLDIVEEDE WLREIQGATYQLSIVRQAMQHAGFQVRAASVMTRRNAVDLDRPPLWSGSLPHLPVYDV RSPRPLRPPSSQHHAVSPELPSRNGIRWQYQELQYLVEEQRRRNQSRNAIPRPSFPPP DPPSQPAEDARDADAERAESPHTAESTVSHDASDNAVRRRHERRRYNALTVRSRDSLL LTRIRFSNQRCFGRGRLRHPAGSGPNTGGPRPGGAGLRQLRQQLTVRWQLFRLRCHGW TQQVSSQIRTRWEESNVVSQTATRVRTWFVQRTTLWRRTWVPGQNPAAEAQELAIIPP APTVLRQNEEPRQQLTGEETRNSTHTQREEVEDVSREGAREGNDGSRASGNDERRNNA …
21939	SNV	C	T	0.0178911	7	13	53.8462	2	17	11.7647		No	UL14	HHV5wtgp019	type 1 membrane protein; possibly involved in immune regulation; UL14 family	membrane protein UL14	AAR31579.1	GI:39842035	MGGGRLPPLWLPLLIAWSEWGNCCLDAPPVVRSPCLQPVRDRNR ERNPGSPQLLPYGDRLEVACIFPAHDWPEVSIRVHLCYWPEIVRSLVVDARSGQVLHN DASCYIAGGRWRFEDGGAAQRLSLSFRLITETAGTYTCVLGNETHSLATETTALVADV HDLRHSDRSCDLAFGSRSQTRYLWTPDPSRLRSINCGWEGERHRVVHYIPGTSGLLPS CEEDERELCVPFISQSIADNNCSRRHRVDGARRRYHLRRDYWLTDPKIGLLAAGSVAL TSLCHLLCYWCSESYRRLNTEEENEAAEETAAGEASAVAAAAVSEEEQQRE
21988	SNV	C	T	0.0415003	8	13	61.5385	4	17	23.5294	AAR31579.1:p.His254Tyr	Yes	UL14	HHV5wtgp019	type 1 membrane protein; possibly involved in immune regulation; UL14 family	membrane protein UL14	AAR31579.1	GI:39842035	MGGGRLPPLWLPLLIAWSEWGNCCLDAPPVVRSPCLQPVRDRNR ERNPGSPQLLPYGDRLEVACIFPAHDWPEVSIRVHLCYWPEIVRSLVVDARSGQVLHN DASCYIAGGRWRFEDGGAAQRLSLSFRLITETAGTYTCVLGNETHSLATETTALVADV HDLRHSDRSCDLAFGSRSQTRYLWTPDPSRLRSINCGWEGERHRVVHYIPGTSGLLPS CEEDERELCVPFISQSIADNNCSRRHRVDGARRRYHLRRDYWLTDPKIGLLAAGSVAL TSLCHLLCYWCSESYRRLNTEEENEAAEETAAGEASAVAAAAVSEEEQQRE
22119	SNV	A	G	0.00505771	10	13	76.9231	4	17	23.5294		No	UL14	HHV5wtgp019	type 1 membrane protein; possibly involved in immune regulation; UL14 family	membrane protein UL14	AAR31579.1	GI:39842035	MGGGRLPPLWLPLLIAWSEWGNCCLDAPPVVRSPCLQPVRDRNR ERNPGSPQLLPYGDRLEVACIFPAHDWPEVSIRVHLCYWPEIVRSLVVDARSGQVLHN DASCYIAGGRWRFEDGGAAQRLSLSFRLITETAGTYTCVLGNETHSLATETTALVADV HDLRHSDRSCDLAFGSRSQTRYLWTPDPSRLRSINCGWEGERHRVVHYIPGTSGLLPS CEEDERELCVPFISQSIADNNCSRRHRVDGARRRYHLRRDYWLTDPKIGLLAAGSVAL TSLCHLLCYWCSESYRRLNTEEENEAAEETAAGEASAVAAAAVSEEEQQRE
22127	SNV	A	G	0.00505771	10	13	76.9231	4	17	23.5294	AAR31579.1:p.Asn300Ser	Yes	UL14	HHV5wtgp019	type 1 membrane protein; possibly involved in immune regulation; UL14 family	membrane protein UL14	AAR31579.1	GI:39842035	MGGGRLPPLWLPLLIAWSEWGNCCLDAPPVVRSPCLQPVRDRNR ERNPGSPQLLPYGDRLEVACIFPAHDWPEVSIRVHLCYWPEIVRSLVVDARSGQVLHN DASCYIAGGRWRFEDGGAAQRLSLSFRLITETAGTYTCVLGNETHSLATETTALVADV HDLRHSDRSCDLAFGSRSQTRYLWTPDPSRLRSINCGWEGERHRVVHYIPGTSGLLPS CEEDERELCVPFISQSIADNNCSRRHRVDGARRRYHLRRDYWLTDPKIGLLAAGSVAL TSLCHLLCYWCSESYRRLNTEEENEAAEETAAGEASAVAAAAVSEEEQQRE
22363	SNV	G	A	0.0178911	7	13	53.8462	2	17	11.7647	AAR31580.1:p.Asp47Asn	Yes	UL15A	HHV5wtgp020	contains potential transmembrane domain	protein UL15A	AAR31580.1	GI:39842036	MKRMIRSHGRKTECQMTGAGERRGSAVGALICGSGTRRGSGANE RRDSDVGPIAHSSGTRRGSANETSACTRTDHQKADIGLWFMFLVFGLCSWLAMRYRAQ
24618	SNV	G	A	0.0473497	12	13	92.3077	10	17	58.8235		No	UL18	HHV5wtgp023	type 1 membrane protein; inhibits NK cell cytotoxicity; acts on inhibitory receptor LIR-1 (ILT2); involved in immune regulation; MHC family	membrane glycoprotein UL18	AAR31583.1	GI:39842039	MMTMWCLTLFVLWMLRVVGMHVLRYGYTGIFDDTSHMTLTVVGI FDGQHFFTYHVNSSDKASSRANGTISWMANVSAAYPTYLDGERAKGDLIFNQTEQNLL ELEIALGYRSQSVLTWTHECNTTENGSFVAGYEGFGWDGETLMELKDNLTLWTGPNYE ISWLKQNKTYIDGKIKNISEGDTTIQRNYLKGNCTQWSVIYSGFQTPVTHPVVKGGVR NQNDNRAEAFCTSYGFFPGEINITFIHYGNKAPDDSEPQCNPLLPTFDGTFHQGCYVA IFCNQNYTCRVTHGNWTVEIPISVTSPDDSSSGEVPDHPTANKRYNTMTISSVLLALL LCALLFAFLHYFTTLKQYLRNLAFAWRYRKVRSS
24636	SNV	G	C	0.0473497	12	13	92.3077	10	17	58.8235	AAR31583.1:p.Gln220His	Yes	UL18	HHV5wtgp023	type 1 membrane protein; inhibits NK cell cytotoxicity; acts on inhibitory receptor LIR-1 (ILT2); involved in immune regulation; MHC family	membrane glycoprotein UL18	AAR31583.1	GI:39842039	MMTMWCLTLFVLWMLRVVGMHVLRYGYTGIFDDTSHMTLTVVGI FDGQHFFTYHVNSSDKASSRANGTISWMANVSAAYPTYLDGERAKGDLIFNQTEQNLL ELEIALGYRSQSVLTWTHECNTTENGSFVAGYEGFGWDGETLMELKDNLTLWTGPNYE ISWLKQNKTYIDGKIKNISEGDTTIQRNYLKGNCTQWSVIYSGFQTPVTHPVVKGGVR NQNDNRAEAFCTSYGFFPGEINITFIHYGNKAPDDSEPQCNPLLPTFDGTFHQGCYVA IFCNQNYTCRVTHGNWTVEIPISVTSPDDSSSGEVPDHPTANKRYNTMTISSVLLALL LCALLFAFLHYFTTLKQYLRNLAFAWRYRKVRSS
27464	SNV	T	C	0.0450775	7	13	53.8462	3	17	17.6471		No	UL22A	HHV5wtgp027	contains signal peptide; secreted protein; binds CC chemokine RANTES; involved in immune regulation	glycoprotein UL22A	AAR31587.1	GI:39842043	MARRLWILSLLAVTLTVALAAPSQKSKRSVTVEQPSTSTNSDGN TTPSKNVTLSQGGSTTDGDEDYSGGDYDVLITDTDGGNHQQPQEKTDEHKGEHTKENE KTQ
31037	SNV	T	C	0.0260901	4	13	30.7692	0	17	0		No	UL25	HHV5wtgp030	UL25 family	tegument protein UL25	AAR31590.1	GI:39842046	MSSRRRSSSRRSGEPSTVIYIPSSNEDTPADEEAEDSVFTSTRA RSATEDLDRMEAGLSPYSVSSDAPSSFELVRETGGTGAAKKPSEKKRSSSRRQPQIAA GAPRGSPATPKAGKSPKVSRPPSVPSLPENGAGGGGDDNSSSGGSSSRTTSNSSRSTS PVAPGEPSAAEGDEFSFCDSDIEDFERECYRVSVADNLGFEPSVVAPQHVEYLKFVLQ DFDVQHLRRLNECIPMPAFALTSLVDPVLNNVAPGERDLTRRIITHAVIINYYYVAQK KARHMVEAIRTTVRGDTVRRVAAQVNNQSRSGRAAALALHFLTSRKGVTDGQYATSLR RLDEELRHRGTPESPRLTEVYQTLRDYNVLFYTAHYTSRGALYLYRQNLQRLNENHRG …
31772	SNV	C	T	0.0260901	4	13	30.7692	0	17	0		No	UL25	HHV5wtgp030	UL25 family	tegument protein UL25	AAR31590.1	GI:39842046	MSSRRRSSSRRSGEPSTVIYIPSSNEDTPADEEAEDSVFTSTRA RSATEDLDRMEAGLSPYSVSSDAPSSFELVRETGGTGAAKKPSEKKRSSSRRQPQIAA GAPRGSPATPKAGKSPKVSRPPSVPSLPENGAGGGGDDNSSSGGSSSRTTSNSSRSTS PVAPGEPSAAEGDEFSFCDSDIEDFERECYRVSVADNLGFEPSVVAPQHVEYLKFVLQ DFDVQHLRRLNECIPMPAFALTSLVDPVLNNVAPGERDLTRRIITHAVIINYYYVAQK KARHMVEAIRTTVRGDTVRRVAAQVNNQSRSGRAAALALHFLTSRKGVTDGQYATSLR RLDEELRHRGTPESPRLTEVYQTLRDYNVLFYTAHYTSRGALYLYRQNLQRLNENHRG …
32088	SNV	G	C	0.0450775	6	13	46.1538	2	17	11.7647	AAR31590.1:p.Ala563Pro	Yes	UL25	HHV5wtgp030	UL25 family	tegument protein UL25	AAR31590.1	GI:39842046	MSSRRRSSSRRSGEPSTVIYIPSSNEDTPADEEAEDSVFTSTRA RSATEDLDRMEAGLSPYSVSSDAPSSFELVRETGGTGAAKKPSEKKRSSSRRQPQIAA GAPRGSPATPKAGKSPKVSRPPSVPSLPENGAGGGGDDNSSSGGSSSRTTSNSSRSTS PVAPGEPSAAEGDEFSFCDSDIEDFERECYRVSVADNLGFEPSVVAPQHVEYLKFVLQ DFDVQHLRRLNECIPMPAFALTSLVDPVLNNVAPGERDLTRRIITHAVIINYYYVAQK KARHMVEAIRTTVRGDTVRRVAAQVNNQSRSGRAAALALHFLTSRKGVTDGQYATSLR RLDEELRHRGTPESPRLTEVYQTLRDYNVLFYTAHYTSRGALYLYRQNLQRLNENHRG …
32126	SNV	G	A	0.0260901	4	13	30.7692	0	17	0		No	UL25	HHV5wtgp030	UL25 family	tegument protein UL25	AAR31590.1	GI:39842046	MSSRRRSSSRRSGEPSTVIYIPSSNEDTPADEEAEDSVFTSTRA RSATEDLDRMEAGLSPYSVSSDAPSSFELVRETGGTGAAKKPSEKKRSSSRRQPQIAA GAPRGSPATPKAGKSPKVSRPPSVPSLPENGAGGGGDDNSSSGGSSSRTTSNSSRSTS PVAPGEPSAAEGDEFSFCDSDIEDFERECYRVSVADNLGFEPSVVAPQHVEYLKFVLQ DFDVQHLRRLNECIPMPAFALTSLVDPVLNNVAPGERDLTRRIITHAVIINYYYVAQK KARHMVEAIRTTVRGDTVRRVAAQVNNQSRSGRAAALALHFLTSRKGVTDGQYATSLR RLDEELRHRGTPESPRLTEVYQTLRDYNVLFYTAHYTSRGALYLYRQNLQRLNENHRG …
32180	SNV	C	T	0.0260901	4	13	30.7692	0	17	0		No	UL25	HHV5wtgp030	UL25 family	tegument protein UL25	AAR31590.1	GI:39842046	MSSRRRSSSRRSGEPSTVIYIPSSNEDTPADEEAEDSVFTSTRA RSATEDLDRMEAGLSPYSVSSDAPSSFELVRETGGTGAAKKPSEKKRSSSRRQPQIAA GAPRGSPATPKAGKSPKVSRPPSVPSLPENGAGGGGDDNSSSGGSSSRTTSNSSRSTS PVAPGEPSAAEGDEFSFCDSDIEDFERECYRVSVADNLGFEPSVVAPQHVEYLKFVLQ DFDVQHLRRLNECIPMPAFALTSLVDPVLNNVAPGERDLTRRIITHAVIINYYYVAQK KARHMVEAIRTTVRGDTVRRVAAQVNNQSRSGRAAALALHFLTSRKGVTDGQYATSLR RLDEELRHRGTPESPRLTEVYQTLRDYNVLFYTAHYTSRGALYLYRQNLQRLNENHRG …
34697	SNV	G	A	0.0397373	5	13	38.4615	1	17	5.88235		No	UL27	HHV5wtgp032	low-level resistance to maribavir	protein UL27	AAR31592.1	GI:39842048	MNPVDQPPPPPLTQQPEEQAKEDHDDGDERLFRDPLTTYEYLDD CRDDEEFCHQFLRAYLTPIRNRQEAVRAGLLCRTPEDLAAAGGQKRKTPAPKHPKHAM VYIRRSCLVHSACATAHGKYDIRGLTLESDLAVWAALRGVPLPPDPQHFRWLNAGAFR RLVHEAQYLPEISRAAKRIALAVATGQYVVCTLLDYKTFGTRTHYLRQLCSMTEELYL RLDGTLCLFLEPEERELIGRCLPAALCRGLPVKYRTHRAAVFFHATFMARAEAALKDL YAAFCECGDGRDDGGNHNGNYGGGDHSSLSPSAVASHHSRLEHAELRLERNRHLGAFH LPAIRHLTAGDVARVQDSVSRDLGFADWSQTLVDDYFLLPAGWACANPRRGYAMYLAS …
34758	SNV	G	A	0.0397373	5	13	38.4615	1	17	5.88235	AAR31592.1:p.Ala84Val	Yes	UL27	HHV5wtgp032	low-level resistance to maribavir	protein UL27	AAR31592.1	GI:39842048	MNPVDQPPPPPLTQQPEEQAKEDHDDGDERLFRDPLTTYEYLDD CRDDEEFCHQFLRAYLTPIRNRQEAVRAGLLCRTPEDLAAAGGQKRKTPAPKHPKHAM VYIRRSCLVHSACATAHGKYDIRGLTLESDLAVWAALRGVPLPPDPQHFRWLNAGAFR RLVHEAQYLPEISRAAKRIALAVATGQYVVCTLLDYKTFGTRTHYLRQLCSMTEELYL RLDGTLCLFLEPEERELIGRCLPAALCRGLPVKYRTHRAAVFFHATFMARAEAALKDL YAAFCECGDGRDDGGNHNGNYGGGDHSSLSPSAVASHHSRLEHAELRLERNRHLGAFH LPAIRHLTAGDVARVQDSVSRDLGFADWSQTLVDDYFLLPAGWACANPRRGYAMYLAS …
35975	SNV	G	A	0.0450775	6	13	46.1538	2	17	11.7647		No	UL29	HHV5wtgp034	interacts with components of the NuRD complex, promoting accumulation of immediate early RNA; US22 family	protein UL29	AAR31593.2	GI:223556061	MSGRRKGCSAATASSSSSSPPSRLPLPGHARRPRRKRCLVPEVF CTRDLADLCVRRDYEGLRRYLRRFEGSCVSLGWPSQCIYVVGGEHSPHSLTEIDLEHC QNDFFGEFRALHLIGTVSHATCRYQVFVDAYGAVFAYDAQEDCLYELASDLAGFFAKG MIRCDPVHESICARLQPNVPLVHPDHRAELCRRSRASARGRYLRSLLAFRELLACEDT AARCAYVEAHREAQLTLIWPEKHSLVLRTARDLGLSASMLRRFQRSLYTREPVMPLGE IEGAEDKTFFHRVRILCGDTGTVYAALVGQDKLVRLSRDLRGFVRVGLALLIDDFRYE SIGPVDRSSLYEANPELRLPFKKRRLVVGYFDSLSSLYLRGQPKFSSIWRGLRDAWTH …
41024	SNV	C	G	0.0450775	6	13	46.1538	2	17	11.7647	AAR31597.1:p.Ser774Thr	Yes	UL32	HHV5wtgp037	major tegument protein; binds to capsids	tegument protein pp150	AAR31597.1	GI:39842053	MSLQFIGLQRRDVVALVNFLRHLTQKPDVDLEAHPKILKKCGEK RLHRRTVLFNELMLWLGYYRELRFHNPDLSSVLEEFEVRCAAVARRGYTYPFGDRGKA RDHLAVLDRTEFDTDVRHDAEIVERALVSAVILAKMSVRETLVTAIGQTEPIAFVHLK DTEVQRIEENLEGVRRNMFCAKPLDLNLDRHANTALVNAVNKLVYTGRLIMNVRRSWE ELERKCLARIQERCKLLVKELRMCLSFDSNYCRNILKHAVENGDSADTLLELLIEDFD IYVDSFPQSAHTFLGARSPSLEFDDDANLLSLGGGSAFSSVPKKHVPTQPLDGWSWIA SPWKGHKPFRFEAHGSLAPAAEAHAARSAAVGYYDEEEKRRERQKRVDDEVVQREKQQ …
48586	SNV	C	T	0.0450775	7	13	53.8462	3	17	17.6471		-
58084	SNV	G	A	0.0178911	7	13	53.8462	2	17	11.7647		No	UL45	HHV5wtgp049	enzymatically inactive; tegument protein	ribonucleotide reductase subunit 1	AAR31609.1	GI:39842065	MNPADADEEQRVSSVPAHRCRPGRIPSRSAETETEESSAEVAAD TIGGDDSELEEGPLPGGDKEASAGNTNVSSGVACVAGFTSGGGVVSWRPESPSPDGTP SVLSLTRDSGPAVPSRGGRVSSGLSTFNPAGATRMELDSVEEEDDFGASLCKVSPPIQ AMRMLMGKKCHCHGYWGKFRFCGVQEPARELPSDRNALWREMDTVSRHSAGLGSFRLF QLIMRHGPCLIRHSPRCDLLLGRFYFKANWARESRTPLCYASELCDESVRRFVLRHME DLPKLAEETARFVELAGCWGLYAAILCLDKVCRQLHGQDESPGGVFLRIAVALTAAIE NSRHSRIYRFHLDARFEGEVLESVLKRCRDGQLSLSTFTMSTVGFDRVPQYDFLISAD …
58306	SNV	T	C	0.0450775	7	13	53.8462	3	17	17.6471		No	UL45	HHV5wtgp049	enzymatically inactive; tegument protein	ribonucleotide reductase subunit 1	AAR31609.1	GI:39842065	MNPADADEEQRVSSVPAHRCRPGRIPSRSAETETEESSAEVAAD TIGGDDSELEEGPLPGGDKEASAGNTNVSSGVACVAGFTSGGGVVSWRPESPSPDGTP SVLSLTRDSGPAVPSRGGRVSSGLSTFNPAGATRMELDSVEEEDDFGASLCKVSPPIQ AMRMLMGKKCHCHGYWGKFRFCGVQEPARELPSDRNALWREMDTVSRHSAGLGSFRLF QLIMRHGPCLIRHSPRCDLLLGRFYFKANWARESRTPLCYASELCDESVRRFVLRHME DLPKLAEETARFVELAGCWGLYAAILCLDKVCRQLHGQDESPGGVFLRIAVALTAAIE NSRHSRIYRFHLDARFEGEVLESVLKRCRDGQLSLSTFTMSTVGFDRVPQYDFLISAD …
58423	SNV	G	A	0.0450775	7	13	53.8462	3	17	17.6471		No	UL45	HHV5wtgp049	enzymatically inactive; tegument protein	ribonucleotide reductase subunit 1	AAR31609.1	GI:39842065	MNPADADEEQRVSSVPAHRCRPGRIPSRSAETETEESSAEVAAD TIGGDDSELEEGPLPGGDKEASAGNTNVSSGVACVAGFTSGGGVVSWRPESPSPDGTP SVLSLTRDSGPAVPSRGGRVSSGLSTFNPAGATRMELDSVEEEDDFGASLCKVSPPIQ AMRMLMGKKCHCHGYWGKFRFCGVQEPARELPSDRNALWREMDTVSRHSAGLGSFRLF QLIMRHGPCLIRHSPRCDLLLGRFYFKANWARESRTPLCYASELCDESVRRFVLRHME DLPKLAEETARFVELAGCWGLYAAILCLDKVCRQLHGQDESPGGVFLRIAVALTAAIE NSRHSRIYRFHLDARFEGEVLESVLKRCRDGQLSLSTFTMSTVGFDRVPQYDFLISAD …
58651	SNV	G	A	0.0178911	7	13	53.8462	2	17	11.7647		No	UL45	HHV5wtgp049	enzymatically inactive; tegument protein	ribonucleotide reductase subunit 1	AAR31609.1	GI:39842065	MNPADADEEQRVSSVPAHRCRPGRIPSRSAETETEESSAEVAAD TIGGDDSELEEGPLPGGDKEASAGNTNVSSGVACVAGFTSGGGVVSWRPESPSPDGTP SVLSLTRDSGPAVPSRGGRVSSGLSTFNPAGATRMELDSVEEEDDFGASLCKVSPPIQ AMRMLMGKKCHCHGYWGKFRFCGVQEPARELPSDRNALWREMDTVSRHSAGLGSFRLF QLIMRHGPCLIRHSPRCDLLLGRFYFKANWARESRTPLCYASELCDESVRRFVLRHME DLPKLAEETARFVELAGCWGLYAAILCLDKVCRQLHGQDESPGGVFLRIAVALTAAIE NSRHSRIYRFHLDARFEGEVLESVLKRCRDGQLSLSTFTMSTVGFDRVPQYDFLISAD …
58719	SNV	A	G	0.01947	11	13	84.6154	7	17	41.1765		No	UL45	HHV5wtgp049	enzymatically inactive; tegument protein	ribonucleotide reductase subunit 1	AAR31609.1	GI:39842065	MNPADADEEQRVSSVPAHRCRPGRIPSRSAETETEESSAEVAAD TIGGDDSELEEGPLPGGDKEASAGNTNVSSGVACVAGFTSGGGVVSWRPESPSPDGTP SVLSLTRDSGPAVPSRGGRVSSGLSTFNPAGATRMELDSVEEEDDFGASLCKVSPPIQ AMRMLMGKKCHCHGYWGKFRFCGVQEPARELPSDRNALWREMDTVSRHSAGLGSFRLF QLIMRHGPCLIRHSPRCDLLLGRFYFKANWARESRTPLCYASELCDESVRRFVLRHME DLPKLAEETARFVELAGCWGLYAAILCLDKVCRQLHGQDESPGGVFLRIAVALTAAIE NSRHSRIYRFHLDARFEGEVLESVLKRCRDGQLSLSTFTMSTVGFDRVPQYDFLISAD …
58764	SNV	G	A	0.0178911	7	13	53.8462	2	17	11.7647		No	UL45	HHV5wtgp049	enzymatically inactive; tegument protein	ribonucleotide reductase subunit 1	AAR31609.1	GI:39842065	MNPADADEEQRVSSVPAHRCRPGRIPSRSAETETEESSAEVAAD TIGGDDSELEEGPLPGGDKEASAGNTNVSSGVACVAGFTSGGGVVSWRPESPSPDGTP SVLSLTRDSGPAVPSRGGRVSSGLSTFNPAGATRMELDSVEEEDDFGASLCKVSPPIQ AMRMLMGKKCHCHGYWGKFRFCGVQEPARELPSDRNALWREMDTVSRHSAGLGSFRLF QLIMRHGPCLIRHSPRCDLLLGRFYFKANWARESRTPLCYASELCDESVRRFVLRHME DLPKLAEETARFVELAGCWGLYAAILCLDKVCRQLHGQDESPGGVFLRIAVALTAAIE NSRHSRIYRFHLDARFEGEVLESVLKRCRDGQLSLSTFTMSTVGFDRVPQYDFLISAD …
59017	SNV	G	A	0.0354823	9	13	69.2308	5	17	29.4118		No	UL45	HHV5wtgp049	enzymatically inactive; tegument protein	ribonucleotide reductase subunit 1	AAR31609.1	GI:39842065	MNPADADEEQRVSSVPAHRCRPGRIPSRSAETETEESSAEVAAD TIGGDDSELEEGPLPGGDKEASAGNTNVSSGVACVAGFTSGGGVVSWRPESPSPDGTP SVLSLTRDSGPAVPSRGGRVSSGLSTFNPAGATRMELDSVEEEDDFGASLCKVSPPIQ AMRMLMGKKCHCHGYWGKFRFCGVQEPARELPSDRNALWREMDTVSRHSAGLGSFRLF QLIMRHGPCLIRHSPRCDLLLGRFYFKANWARESRTPLCYASELCDESVRRFVLRHME DLPKLAEETARFVELAGCWGLYAAILCLDKVCRQLHGQDESPGGVFLRIAVALTAAIE NSRHSRIYRFHLDARFEGEVLESVLKRCRDGQLSLSTFTMSTVGFDRVPQYDFLISAD …
59056	SNV	G	C	0.0159236	9	13	69.2308	4	17	23.5294		No	UL45	HHV5wtgp049	enzymatically inactive; tegument protein	ribonucleotide reductase subunit 1	AAR31609.1	GI:39842065	MNPADADEEQRVSSVPAHRCRPGRIPSRSAETETEESSAEVAAD TIGGDDSELEEGPLPGGDKEASAGNTNVSSGVACVAGFTSGGGVVSWRPESPSPDGTP SVLSLTRDSGPAVPSRGGRVSSGLSTFNPAGATRMELDSVEEEDDFGASLCKVSPPIQ AMRMLMGKKCHCHGYWGKFRFCGVQEPARELPSDRNALWREMDTVSRHSAGLGSFRLF QLIMRHGPCLIRHSPRCDLLLGRFYFKANWARESRTPLCYASELCDESVRRFVLRHME DLPKLAEETARFVELAGCWGLYAAILCLDKVCRQLHGQDESPGGVFLRIAVALTAAIE NSRHSRIYRFHLDARFEGEVLESVLKRCRDGQLSLSTFTMSTVGFDRVPQYDFLISAD …
60576	SNV	C	A	0.0415003	8	13	61.5385	4	17	23.5294	AAR31609.1:p.Ala30Ser	Yes	UL45	HHV5wtgp049	enzymatically inactive; tegument protein	ribonucleotide reductase subunit 1	AAR31609.1	GI:39842065	MNPADADEEQRVSSVPAHRCRPGRIPSRSAETETEESSAEVAAD TIGGDDSELEEGPLPGGDKEASAGNTNVSSGVACVAGFTSGGGVVSWRPESPSPDGTP SVLSLTRDSGPAVPSRGGRVSSGLSTFNPAGATRMELDSVEEEDDFGASLCKVSPPIQ AMRMLMGKKCHCHGYWGKFRFCGVQEPARELPSDRNALWREMDTVSRHSAGLGSFRLF QLIMRHGPCLIRHSPRCDLLLGRFYFKANWARESRTPLCYASELCDESVRRFVLRHME DLPKLAEETARFVELAGCWGLYAAILCLDKVCRQLHGQDESPGGVFLRIAVALTAAIE NSRHSRIYRFHLDARFEGEVLESVLKRCRDGQLSLSTFTMSTVGFDRVPQYDFLISAD …
60762^60763	Insertion	-	TTTA	0.0159236	9	13	69.2308	4	17	23.5294		-
60765^60766	Insertion	-	A	0.0090312	5	13	38.4615	0	17	0		-
61433	SNV	A	G	0.0354823	9	13	69.2308	5	17	29.4118		No	UL46	HHV5wtgp050	complexed 1:2 with capsid triplex subunit 2 to connect capsid hexons and pentons; involved in capsid morphogenesis	capsid triplex subunit 1	AAR31610.1	GI:39842066	MDARAVAKRPRDPADEDNELVTALKAKREVNTISVRYLYHADHQ ALTARFFVPEGLVEFEAQPGALLIRMETGCDSPRHLYISLYLLGIRASNVSASTRCLL ESVYTASAARAALQWLDLGPHLLHRRLETLGCVKTVSLGITSLLTCVMRGYLYNTLKT EVFALMIPKDMYLTWEETRGRLQYVYLIIVYDYDGPETRPGIYVLTSSIAHWQTLVDV ARGKFARERCSFVNRRITRPRQIPLCTGVIQKLGWCLADDIHTSFLVHKELKLSVVRL DNFSVELGDFREFV
61601	SNV	G	T	0.0397373	5	13	38.4615	1	17	5.88235		No	UL46	HHV5wtgp050	complexed 1:2 with capsid triplex subunit 2 to connect capsid hexons and pentons; involved in capsid morphogenesis	capsid triplex subunit 1	AAR31610.1	GI:39842066	MDARAVAKRPRDPADEDNELVTALKAKREVNTISVRYLYHADHQ ALTARFFVPEGLVEFEAQPGALLIRMETGCDSPRHLYISLYLLGIRASNVSASTRCLL ESVYTASAARAALQWLDLGPHLLHRRLETLGCVKTVSLGITSLLTCVMRGYLYNTLKT EVFALMIPKDMYLTWEETRGRLQYVYLIIVYDYDGPETRPGIYVLTSSIAHWQTLVDV ARGKFARERCSFVNRRITRPRQIPLCTGVIQKLGWCLADDIHTSFLVHKELKLSVVRL DNFSVELGDFREFV
61976	SNV	G	A	0.0450775	7	13	53.8462	3	17	17.6471		No	UL47	HHV5wtgp051	complexed with large tegument protein; involved in virion morphogenesis	tegument protein UL37	AAR31611.1	GI:39842067	MMARRTVDFKKLIEQLRARATDKAEALNTVSQLEIGAVDAQDVT ASAVRAFVGALPSSGYHFGFVRQNVVFYLLSHATVQTARDPLYAAEQLHEQLDRFLRH QHDGGGDEDRLPFYHNGATLTAFQKLLQTLREIQTVIAEQSGGTAAAADLIASNNAST ERRGKKGGSSSGGQQPLVRRVITQLETAATEARPYVNCRAVAELLDLTYQRLIYWACT LMPYVLFRRDTDTELDTVLLMHFFYTHYRSVNGDLAVEFQNYVKNSVRHMSSFVSSDI DGDQKPGAEHMRDVSYKLFVGNLQARDASGLMFPIISTRISTVNLYLSPERMFFHPGL ISRLLSEEVSPRANLDAYARVCDRVLEDHLHTPRRVQRLLDLTQMVMRLVELGFNHDT …
62112	SNV	A	G	0.0450775	7	13	53.8462	3	17	17.6471	AAR31611.1:p.Thr146Ala	Yes	UL47	HHV5wtgp051	complexed with large tegument protein; involved in virion morphogenesis	tegument protein UL37	AAR31611.1	GI:39842067	MMARRTVDFKKLIEQLRARATDKAEALNTVSQLEIGAVDAQDVT ASAVRAFVGALPSSGYHFGFVRQNVVFYLLSHATVQTARDPLYAAEQLHEQLDRFLRH QHDGGGDEDRLPFYHNGATLTAFQKLLQTLREIQTVIAEQSGGTAAAADLIASNNAST ERRGKKGGSSSGGQQPLVRRVITQLETAATEARPYVNCRAVAELLDLTYQRLIYWACT LMPYVLFRRDTDTELDTVLLMHFFYTHYRSVNGDLAVEFQNYVKNSVRHMSSFVSSDI DGDQKPGAEHMRDVSYKLFVGNLQARDASGLMFPIISTRISTVNLYLSPERMFFHPGL ISRLLSEEVSPRANLDAYARVCDRVLEDHLHTPRRVQRLLDLTQMVMRLVELGFNHDT …
62154	SNV	A	G	0.0178911	8	13	61.5385	3	17	17.6471	AAR31611.1:p.Thr160Ala	Yes	UL47	HHV5wtgp051	complexed with large tegument protein; involved in virion morphogenesis	tegument protein UL37	AAR31611.1	GI:39842067	MMARRTVDFKKLIEQLRARATDKAEALNTVSQLEIGAVDAQDVT ASAVRAFVGALPSSGYHFGFVRQNVVFYLLSHATVQTARDPLYAAEQLHEQLDRFLRH QHDGGGDEDRLPFYHNGATLTAFQKLLQTLREIQTVIAEQSGGTAAAADLIASNNAST ERRGKKGGSSSGGQQPLVRRVITQLETAATEARPYVNCRAVAELLDLTYQRLIYWACT LMPYVLFRRDTDTELDTVLLMHFFYTHYRSVNGDLAVEFQNYVKNSVRHMSSFVSSDI DGDQKPGAEHMRDVSYKLFVGNLQARDASGLMFPIISTRISTVNLYLSPERMFFHPGL ISRLLSEEVSPRANLDAYARVCDRVLEDHLHTPRRVQRLLDLTQMVMRLVELGFNHDT …
62242	SNV	C	T	0.0415003	8	13	61.5385	4	17	23.5294	AAR31611.1:p.Ala189Val	Yes	UL47	HHV5wtgp051	complexed with large tegument protein; involved in virion morphogenesis	tegument protein UL37	AAR31611.1	GI:39842067	MMARRTVDFKKLIEQLRARATDKAEALNTVSQLEIGAVDAQDVT ASAVRAFVGALPSSGYHFGFVRQNVVFYLLSHATVQTARDPLYAAEQLHEQLDRFLRH QHDGGGDEDRLPFYHNGATLTAFQKLLQTLREIQTVIAEQSGGTAAAADLIASNNAST ERRGKKGGSSSGGQQPLVRRVITQLETAATEARPYVNCRAVAELLDLTYQRLIYWACT LMPYVLFRRDTDTELDTVLLMHFFYTHYRSVNGDLAVEFQNYVKNSVRHMSSFVSSDI DGDQKPGAEHMRDVSYKLFVGNLQARDASGLMFPIISTRISTVNLYLSPERMFFHPGL ISRLLSEEVSPRANLDAYARVCDRVLEDHLHTPRRVQRLLDLTQMVMRLVELGFNHDT …
62690	SNV	G	A	0.0450775	7	13	53.8462	3	17	17.6471		No	UL47	HHV5wtgp051	complexed with large tegument protein; involved in virion morphogenesis	tegument protein UL37	AAR31611.1	GI:39842067	MMARRTVDFKKLIEQLRARATDKAEALNTVSQLEIGAVDAQDVT ASAVRAFVGALPSSGYHFGFVRQNVVFYLLSHATVQTARDPLYAAEQLHEQLDRFLRH QHDGGGDEDRLPFYHNGATLTAFQKLLQTLREIQTVIAEQSGGTAAAADLIASNNAST ERRGKKGGSSSGGQQPLVRRVITQLETAATEARPYVNCRAVAELLDLTYQRLIYWACT LMPYVLFRRDTDTELDTVLLMHFFYTHYRSVNGDLAVEFQNYVKNSVRHMSSFVSSDI DGDQKPGAEHMRDVSYKLFVGNLQARDASGLMFPIISTRISTVNLYLSPERMFFHPGL ISRLLSEEVSPRANLDAYARVCDRVLEDHLHTPRRVQRLLDLTQMVMRLVELGFNHDT …
62807	SNV	G	A	0.0450775	7	13	53.8462	3	17	17.6471		No	UL47	HHV5wtgp051	complexed with large tegument protein; involved in virion morphogenesis	tegument protein UL37	AAR31611.1	GI:39842067	MMARRTVDFKKLIEQLRARATDKAEALNTVSQLEIGAVDAQDVT ASAVRAFVGALPSSGYHFGFVRQNVVFYLLSHATVQTARDPLYAAEQLHEQLDRFLRH QHDGGGDEDRLPFYHNGATLTAFQKLLQTLREIQTVIAEQSGGTAAAADLIASNNAST ERRGKKGGSSSGGQQPLVRRVITQLETAATEARPYVNCRAVAELLDLTYQRLIYWACT LMPYVLFRRDTDTELDTVLLMHFFYTHYRSVNGDLAVEFQNYVKNSVRHMSSFVSSDI DGDQKPGAEHMRDVSYKLFVGNLQARDASGLMFPIISTRISTVNLYLSPERMFFHPGL ISRLLSEEVSPRANLDAYARVCDRVLEDHLHTPRRVQRLLDLTQMVMRLVELGFNHDT …
66166	SNV	C	T	0.0260901	4	13	30.7692	0	17	0		No	UL48	HHV5wtgp052	complexed with tegument protein UL37; ubiquitin-specific protease (N-terminal region); involved in capsid transport	large tegument protein	AAR31613.1	GI:39842069	MKVTQASCHQGDIARFGARAGNQCVCNGIMFLHALHLGGTSAVL QTEALDAIMEEGARLDARLERELQKKLPAGGRLPVYRLGDEVPRRLESRFGRTVHALS RPFNGTTETCDLDGYMCPGIFDFLRYAHAKPRPTYVLVTVNSLARAVVFTEDHMLVFD PHSSAECHNAAVYHCEGLHQVLMVLTGFGVQLSPAFYYEALFLYMLDVATVPEAEIAA RLVSTYRDRDIDLTGVVRESADTAATTTTAAPSLPPLPDPIVDPGCPPGVAPSIPVYD PSSSPKKTPEKRRKDLSGSKHGGKKKPPSTTSKTLATASSSPSAIAAASSSSAVPPSY SCGEGALPALGRYQQLVDEVEQELKALTLPPLPANTSAWTLHAAGTESGANAATATAP …
66289	SNV	G	A	0.0260901	4	13	30.7692	0	17	0		No	UL48	HHV5wtgp052	complexed with tegument protein UL37; ubiquitin-specific protease (N-terminal region); involved in capsid transport	large tegument protein	AAR31613.1	GI:39842069	MKVTQASCHQGDIARFGARAGNQCVCNGIMFLHALHLGGTSAVL QTEALDAIMEEGARLDARLERELQKKLPAGGRLPVYRLGDEVPRRLESRFGRTVHALS RPFNGTTETCDLDGYMCPGIFDFLRYAHAKPRPTYVLVTVNSLARAVVFTEDHMLVFD PHSSAECHNAAVYHCEGLHQVLMVLTGFGVQLSPAFYYEALFLYMLDVATVPEAEIAA RLVSTYRDRDIDLTGVVRESADTAATTTTAAPSLPPLPDPIVDPGCPPGVAPSIPVYD PSSSPKKTPEKRRKDLSGSKHGGKKKPPSTTSKTLATASSSPSAIAAASSSSAVPPSY SCGEGALPALGRYQQLVDEVEQELKALTLPPLPANTSAWTLHAAGTESGANAATATAP …
67042	SNV	G	A	0.0260901	4	13	30.7692	0	17	0		No	UL48	HHV5wtgp052	complexed with tegument protein UL37; ubiquitin-specific protease (N-terminal region); involved in capsid transport	large tegument protein	AAR31613.1	GI:39842069	MKVTQASCHQGDIARFGARAGNQCVCNGIMFLHALHLGGTSAVL QTEALDAIMEEGARLDARLERELQKKLPAGGRLPVYRLGDEVPRRLESRFGRTVHALS RPFNGTTETCDLDGYMCPGIFDFLRYAHAKPRPTYVLVTVNSLARAVVFTEDHMLVFD PHSSAECHNAAVYHCEGLHQVLMVLTGFGVQLSPAFYYEALFLYMLDVATVPEAEIAA RLVSTYRDRDIDLTGVVRESADTAATTTTAAPSLPPLPDPIVDPGCPPGVAPSIPVYD PSSSPKKTPEKRRKDLSGSKHGGKKKPPSTTSKTLATASSSPSAIAAASSSSAVPPSY SCGEGALPALGRYQQLVDEVEQELKALTLPPLPANTSAWTLHAAGTESGANAATATAP …
67231	SNV	T	C	0.0450775	6	13	46.1538	2	17	11.7647		No	UL48	HHV5wtgp052	complexed with tegument protein UL37; ubiquitin-specific protease (N-terminal region); involved in capsid transport	large tegument protein	AAR31613.1	GI:39842069	MKVTQASCHQGDIARFGARAGNQCVCNGIMFLHALHLGGTSAVL QTEALDAIMEEGARLDARLERELQKKLPAGGRLPVYRLGDEVPRRLESRFGRTVHALS RPFNGTTETCDLDGYMCPGIFDFLRYAHAKPRPTYVLVTVNSLARAVVFTEDHMLVFD PHSSAECHNAAVYHCEGLHQVLMVLTGFGVQLSPAFYYEALFLYMLDVATVPEAEIAA RLVSTYRDRDIDLTGVVRESADTAATTTTAAPSLPPLPDPIVDPGCPPGVAPSIPVYD PSSSPKKTPEKRRKDLSGSKHGGKKKPPSTTSKTLATASSSPSAIAAASSSSAVPPSY SCGEGALPALGRYQQLVDEVEQELKALTLPPLPANTSAWTLHAAGTESGANAATATAP …
67423	SNV	A	G	0.0090312	5	13	38.4615	0	17	0		No	UL48	HHV5wtgp052	complexed with tegument protein UL37; ubiquitin-specific protease (N-terminal region); involved in capsid transport	large tegument protein	AAR31613.1	GI:39842069	MKVTQASCHQGDIARFGARAGNQCVCNGIMFLHALHLGGTSAVL QTEALDAIMEEGARLDARLERELQKKLPAGGRLPVYRLGDEVPRRLESRFGRTVHALS RPFNGTTETCDLDGYMCPGIFDFLRYAHAKPRPTYVLVTVNSLARAVVFTEDHMLVFD PHSSAECHNAAVYHCEGLHQVLMVLTGFGVQLSPAFYYEALFLYMLDVATVPEAEIAA RLVSTYRDRDIDLTGVVRESADTAATTTTAAPSLPPLPDPIVDPGCPPGVAPSIPVYD PSSSPKKTPEKRRKDLSGSKHGGKKKPPSTTSKTLATASSSPSAIAAASSSSAVPPSY SCGEGALPALGRYQQLVDEVEQELKALTLPPLPANTSAWTLHAAGTESGANAATATAP …
67501	SNV	G	A	0.0090312	5	13	38.4615	0	17	0		No	UL48	HHV5wtgp052	complexed with tegument protein UL37; ubiquitin-specific protease (N-terminal region); involved in capsid transport	large tegument protein	AAR31613.1	GI:39842069	MKVTQASCHQGDIARFGARAGNQCVCNGIMFLHALHLGGTSAVL QTEALDAIMEEGARLDARLERELQKKLPAGGRLPVYRLGDEVPRRLESRFGRTVHALS RPFNGTTETCDLDGYMCPGIFDFLRYAHAKPRPTYVLVTVNSLARAVVFTEDHMLVFD PHSSAECHNAAVYHCEGLHQVLMVLTGFGVQLSPAFYYEALFLYMLDVATVPEAEIAA RLVSTYRDRDIDLTGVVRESADTAATTTTAAPSLPPLPDPIVDPGCPPGVAPSIPVYD PSSSPKKTPEKRRKDLSGSKHGGKKKPPSTTSKTLATASSSPSAIAAASSSSAVPPSY SCGEGALPALGRYQQLVDEVEQELKALTLPPLPANTSAWTLHAAGTESGANAATATAP …
67594	SNV	G	A	0.0090312	5	13	38.4615	0	17	0		No	UL48	HHV5wtgp052	complexed with tegument protein UL37; ubiquitin-specific protease (N-terminal region); involved in capsid transport	large tegument protein	AAR31613.1	GI:39842069	MKVTQASCHQGDIARFGARAGNQCVCNGIMFLHALHLGGTSAVL QTEALDAIMEEGARLDARLERELQKKLPAGGRLPVYRLGDEVPRRLESRFGRTVHALS RPFNGTTETCDLDGYMCPGIFDFLRYAHAKPRPTYVLVTVNSLARAVVFTEDHMLVFD PHSSAECHNAAVYHCEGLHQVLMVLTGFGVQLSPAFYYEALFLYMLDVATVPEAEIAA RLVSTYRDRDIDLTGVVRESADTAATTTTAAPSLPPLPDPIVDPGCPPGVAPSIPVYD PSSSPKKTPEKRRKDLSGSKHGGKKKPPSTTSKTLATASSSPSAIAAASSSSAVPPSY SCGEGALPALGRYQQLVDEVEQELKALTLPPLPANTSAWTLHAAGTESGANAATATAP …
67714	SNV	C	T	0.0397373	5	13	38.4615	1	17	5.88235		No	UL48	HHV5wtgp052	complexed with tegument protein UL37; ubiquitin-specific protease (N-terminal region); involved in capsid transport	large tegument protein	AAR31613.1	GI:39842069	MKVTQASCHQGDIARFGARAGNQCVCNGIMFLHALHLGGTSAVL QTEALDAIMEEGARLDARLERELQKKLPAGGRLPVYRLGDEVPRRLESRFGRTVHALS RPFNGTTETCDLDGYMCPGIFDFLRYAHAKPRPTYVLVTVNSLARAVVFTEDHMLVFD PHSSAECHNAAVYHCEGLHQVLMVLTGFGVQLSPAFYYEALFLYMLDVATVPEAEIAA RLVSTYRDRDIDLTGVVRESADTAATTTTAAPSLPPLPDPIVDPGCPPGVAPSIPVYD PSSSPKKTPEKRRKDLSGSKHGGKKKPPSTTSKTLATASSSPSAIAAASSSSAVPPSY SCGEGALPALGRYQQLVDEVEQELKALTLPPLPANTSAWTLHAAGTESGANAATATAP …
67735	SNV	C	T	0.0397373	5	13	38.4615	1	17	5.88235		No	UL48	HHV5wtgp052	complexed with tegument protein UL37; ubiquitin-specific protease (N-terminal region); involved in capsid transport	large tegument protein	AAR31613.1	GI:39842069	MKVTQASCHQGDIARFGARAGNQCVCNGIMFLHALHLGGTSAVL QTEALDAIMEEGARLDARLERELQKKLPAGGRLPVYRLGDEVPRRLESRFGRTVHALS RPFNGTTETCDLDGYMCPGIFDFLRYAHAKPRPTYVLVTVNSLARAVVFTEDHMLVFD PHSSAECHNAAVYHCEGLHQVLMVLTGFGVQLSPAFYYEALFLYMLDVATVPEAEIAA RLVSTYRDRDIDLTGVVRESADTAATTTTAAPSLPPLPDPIVDPGCPPGVAPSIPVYD PSSSPKKTPEKRRKDLSGSKHGGKKKPPSTTSKTLATASSSPSAIAAASSSSAVPPSY SCGEGALPALGRYQQLVDEVEQELKALTLPPLPANTSAWTLHAAGTESGANAATATAP …
68293	SNV	G	A	0.0159236	9	13	69.2308	4	17	23.5294		No	UL48	HHV5wtgp052	complexed with tegument protein UL37; ubiquitin-specific protease (N-terminal region); involved in capsid transport	large tegument protein	AAR31613.1	GI:39842069	MKVTQASCHQGDIARFGARAGNQCVCNGIMFLHALHLGGTSAVL QTEALDAIMEEGARLDARLERELQKKLPAGGRLPVYRLGDEVPRRLESRFGRTVHALS RPFNGTTETCDLDGYMCPGIFDFLRYAHAKPRPTYVLVTVNSLARAVVFTEDHMLVFD PHSSAECHNAAVYHCEGLHQVLMVLTGFGVQLSPAFYYEALFLYMLDVATVPEAEIAA RLVSTYRDRDIDLTGVVRESADTAATTTTAAPSLPPLPDPIVDPGCPPGVAPSIPVYD PSSSPKKTPEKRRKDLSGSKHGGKKKPPSTTSKTLATASSSPSAIAAASSSSAVPPSY SCGEGALPALGRYQQLVDEVEQELKALTLPPLPANTSAWTLHAAGTESGANAATATAP …
68310	SNV	C	T	0.0397373	5	13	38.4615	1	17	5.88235	AAR31613.1:p.Ala1229Val	Yes	UL48	HHV5wtgp052	complexed with tegument protein UL37; ubiquitin-specific protease (N-terminal region); involved in capsid transport	large tegument protein	AAR31613.1	GI:39842069	MKVTQASCHQGDIARFGARAGNQCVCNGIMFLHALHLGGTSAVL QTEALDAIMEEGARLDARLERELQKKLPAGGRLPVYRLGDEVPRRLESRFGRTVHALS RPFNGTTETCDLDGYMCPGIFDFLRYAHAKPRPTYVLVTVNSLARAVVFTEDHMLVFD PHSSAECHNAAVYHCEGLHQVLMVLTGFGVQLSPAFYYEALFLYMLDVATVPEAEIAA RLVSTYRDRDIDLTGVVRESADTAATTTTAAPSLPPLPDPIVDPGCPPGVAPSIPVYD PSSSPKKTPEKRRKDLSGSKHGGKKKPPSTTSKTLATASSSPSAIAAASSSSAVPPSY SCGEGALPALGRYQQLVDEVEQELKALTLPPLPANTSAWTLHAAGTESGANAATATAP …
68636	Deletion	C	-	0.0260901	4	13	30.7692	0	17	0	AAR31613.1:p.Leu1338fs	Yes	UL48	HHV5wtgp052	complexed with tegument protein UL37; ubiquitin-specific protease (N-terminal region); involved in capsid transport	large tegument protein	AAR31613.1	GI:39842069	MKVTQASCHQGDIARFGARAGNQCVCNGIMFLHALHLGGTSAVL QTEALDAIMEEGARLDARLERELQKKLPAGGRLPVYRLGDEVPRRLESRFGRTVHALS RPFNGTTETCDLDGYMCPGIFDFLRYAHAKPRPTYVLVTVNSLARAVVFTEDHMLVFD PHSSAECHNAAVYHCEGLHQVLMVLTGFGVQLSPAFYYEALFLYMLDVATVPEAEIAA RLVSTYRDRDIDLTGVVRESADTAATTTTAAPSLPPLPDPIVDPGCPPGVAPSIPVYD PSSSPKKTPEKRRKDLSGSKHGGKKKPPSTTSKTLATASSSPSAIAAASSSSAVPPSY SCGEGALPALGRYQQLVDEVEQELKALTLPPLPANTSAWTLHAAGTESGANAATATAP …
68713	SNV	G	A	0.0450775	7	13	53.8462	3	17	17.6471		No	UL48	HHV5wtgp052	complexed with tegument protein UL37; ubiquitin-specific protease (N-terminal region); involved in capsid transport	large tegument protein	AAR31613.1	GI:39842069	MKVTQASCHQGDIARFGARAGNQCVCNGIMFLHALHLGGTSAVL QTEALDAIMEEGARLDARLERELQKKLPAGGRLPVYRLGDEVPRRLESRFGRTVHALS RPFNGTTETCDLDGYMCPGIFDFLRYAHAKPRPTYVLVTVNSLARAVVFTEDHMLVFD PHSSAECHNAAVYHCEGLHQVLMVLTGFGVQLSPAFYYEALFLYMLDVATVPEAEIAA RLVSTYRDRDIDLTGVVRESADTAATTTTAAPSLPPLPDPIVDPGCPPGVAPSIPVYD PSSSPKKTPEKRRKDLSGSKHGGKKKPPSTTSKTLATASSSPSAIAAASSSSAVPPSY SCGEGALPALGRYQQLVDEVEQELKALTLPPLPANTSAWTLHAAGTESGANAATATAP …
68725	SNV	T	C	0.0278761	10	13	76.9231	6	17	35.2941		No	UL48	HHV5wtgp052	complexed with tegument protein UL37; ubiquitin-specific protease (N-terminal region); involved in capsid transport	large tegument protein	AAR31613.1	GI:39842069	MKVTQASCHQGDIARFGARAGNQCVCNGIMFLHALHLGGTSAVL QTEALDAIMEEGARLDARLERELQKKLPAGGRLPVYRLGDEVPRRLESRFGRTVHALS RPFNGTTETCDLDGYMCPGIFDFLRYAHAKPRPTYVLVTVNSLARAVVFTEDHMLVFD PHSSAECHNAAVYHCEGLHQVLMVLTGFGVQLSPAFYYEALFLYMLDVATVPEAEIAA RLVSTYRDRDIDLTGVVRESADTAATTTTAAPSLPPLPDPIVDPGCPPGVAPSIPVYD PSSSPKKTPEKRRKDLSGSKHGGKKKPPSTTSKTLATASSSPSAIAAASSSSAVPPSY SCGEGALPALGRYQQLVDEVEQELKALTLPPLPANTSAWTLHAAGTESGANAATATAP …
69376	SNV	T	C	0.0434227	13	13	100	12	17	70.5882		No	UL48	HHV5wtgp052	complexed with tegument protein UL37; ubiquitin-specific protease (N-terminal region); involved in capsid transport	large tegument protein	AAR31613.1	GI:39842069	MKVTQASCHQGDIARFGARAGNQCVCNGIMFLHALHLGGTSAVL QTEALDAIMEEGARLDARLERELQKKLPAGGRLPVYRLGDEVPRRLESRFGRTVHALS RPFNGTTETCDLDGYMCPGIFDFLRYAHAKPRPTYVLVTVNSLARAVVFTEDHMLVFD PHSSAECHNAAVYHCEGLHQVLMVLTGFGVQLSPAFYYEALFLYMLDVATVPEAEIAA RLVSTYRDRDIDLTGVVRESADTAATTTTAAPSLPPLPDPIVDPGCPPGVAPSIPVYD PSSSPKKTPEKRRKDLSGSKHGGKKKPPSTTSKTLATASSSPSAIAAASSSSAVPPSY SCGEGALPALGRYQQLVDEVEQELKALTLPPLPANTSAWTLHAAGTESGANAATATAP …
69616	SNV	G	A	0.0260901	4	13	30.7692	0	17	0		No	UL48	HHV5wtgp052	complexed with tegument protein UL37; ubiquitin-specific protease (N-terminal region); involved in capsid transport	large tegument protein	AAR31613.1	GI:39842069	MKVTQASCHQGDIARFGARAGNQCVCNGIMFLHALHLGGTSAVL QTEALDAIMEEGARLDARLERELQKKLPAGGRLPVYRLGDEVPRRLESRFGRTVHALS RPFNGTTETCDLDGYMCPGIFDFLRYAHAKPRPTYVLVTVNSLARAVVFTEDHMLVFD PHSSAECHNAAVYHCEGLHQVLMVLTGFGVQLSPAFYYEALFLYMLDVATVPEAEIAA RLVSTYRDRDIDLTGVVRESADTAATTTTAAPSLPPLPDPIVDPGCPPGVAPSIPVYD PSSSPKKTPEKRRKDLSGSKHGGKKKPPSTTSKTLATASSSPSAIAAASSSSAVPPSY SCGEGALPALGRYQQLVDEVEQELKALTLPPLPANTSAWTLHAAGTESGANAATATAP …
69913	SNV	G	A	0.0397373	5	13	38.4615	1	17	5.88235		No	UL48	HHV5wtgp052	complexed with tegument protein UL37; ubiquitin-specific protease (N-terminal region); involved in capsid transport	large tegument protein	AAR31613.1	GI:39842069	MKVTQASCHQGDIARFGARAGNQCVCNGIMFLHALHLGGTSAVL QTEALDAIMEEGARLDARLERELQKKLPAGGRLPVYRLGDEVPRRLESRFGRTVHALS RPFNGTTETCDLDGYMCPGIFDFLRYAHAKPRPTYVLVTVNSLARAVVFTEDHMLVFD PHSSAECHNAAVYHCEGLHQVLMVLTGFGVQLSPAFYYEALFLYMLDVATVPEAEIAA RLVSTYRDRDIDLTGVVRESADTAATTTTAAPSLPPLPDPIVDPGCPPGVAPSIPVYD PSSSPKKTPEKRRKDLSGSKHGGKKKPPSTTSKTLATASSSPSAIAAASSSSAVPPSY SCGEGALPALGRYQQLVDEVEQELKALTLPPLPANTSAWTLHAAGTESGANAATATAP …
69931	SNV	G	A	0.0434227	13	13	100	12	17	70.5882		No	UL48	HHV5wtgp052	complexed with tegument protein UL37; ubiquitin-specific protease (N-terminal region); involved in capsid transport	large tegument protein	AAR31613.1	GI:39842069	MKVTQASCHQGDIARFGARAGNQCVCNGIMFLHALHLGGTSAVL QTEALDAIMEEGARLDARLERELQKKLPAGGRLPVYRLGDEVPRRLESRFGRTVHALS RPFNGTTETCDLDGYMCPGIFDFLRYAHAKPRPTYVLVTVNSLARAVVFTEDHMLVFD PHSSAECHNAAVYHCEGLHQVLMVLTGFGVQLSPAFYYEALFLYMLDVATVPEAEIAA RLVSTYRDRDIDLTGVVRESADTAATTTTAAPSLPPLPDPIVDPGCPPGVAPSIPVYD PSSSPKKTPEKRRKDLSGSKHGGKKKPPSTTSKTLATASSSPSAIAAASSSSAVPPSY SCGEGALPALGRYQQLVDEVEQELKALTLPPLPANTSAWTLHAAGTESGANAATATAP …
70141..70142	MNV	AT	GC	0.00623974	8	13	61.5385	2	17	11.7647	AAR31613.1:p.Ser1840Pro	Yes	UL48	HHV5wtgp052	complexed with tegument protein UL37; ubiquitin-specific protease (N-terminal region); involved in capsid transport	large tegument protein	AAR31613.1	GI:39842069	MKVTQASCHQGDIARFGARAGNQCVCNGIMFLHALHLGGTSAVL QTEALDAIMEEGARLDARLERELQKKLPAGGRLPVYRLGDEVPRRLESRFGRTVHALS RPFNGTTETCDLDGYMCPGIFDFLRYAHAKPRPTYVLVTVNSLARAVVFTEDHMLVFD PHSSAECHNAAVYHCEGLHQVLMVLTGFGVQLSPAFYYEALFLYMLDVATVPEAEIAA RLVSTYRDRDIDLTGVVRESADTAATTTTAAPSLPPLPDPIVDPGCPPGVAPSIPVYD PSSSPKKTPEKRRKDLSGSKHGGKKKPPSTTSKTLATASSSPSAIAAASSSSAVPPSY SCGEGALPALGRYQQLVDEVEQELKALTLPPLPANTSAWTLHAAGTESGANAATATAP …
70142	SNV	T	C	0.0237881	12	13	92.3077	9	17	52.9412	AAR31613.1:p.Ser1840Pro	Yes	UL48	HHV5wtgp052	complexed with tegument protein UL37; ubiquitin-specific protease (N-terminal region); involved in capsid transport	large tegument protein	AAR31613.1	GI:39842069	MKVTQASCHQGDIARFGARAGNQCVCNGIMFLHALHLGGTSAVL QTEALDAIMEEGARLDARLERELQKKLPAGGRLPVYRLGDEVPRRLESRFGRTVHALS RPFNGTTETCDLDGYMCPGIFDFLRYAHAKPRPTYVLVTVNSLARAVVFTEDHMLVFD PHSSAECHNAAVYHCEGLHQVLMVLTGFGVQLSPAFYYEALFLYMLDVATVPEAEIAA RLVSTYRDRDIDLTGVVRESADTAATTTTAAPSLPPLPDPIVDPGCPPGVAPSIPVYD PSSSPKKTPEKRRKDLSGSKHGGKKKPPSTTSKTLATASSSPSAIAAASSSSAVPPSY SCGEGALPALGRYQQLVDEVEQELKALTLPPLPANTSAWTLHAAGTESGANAATATAP …
70145	SNV	C	T	0.0397373	5	13	38.4615	1	17	5.88235		No	UL48	HHV5wtgp052	complexed with tegument protein UL37; ubiquitin-specific protease (N-terminal region); involved in capsid transport	large tegument protein	AAR31613.1	GI:39842069	MKVTQASCHQGDIARFGARAGNQCVCNGIMFLHALHLGGTSAVL QTEALDAIMEEGARLDARLERELQKKLPAGGRLPVYRLGDEVPRRLESRFGRTVHALS RPFNGTTETCDLDGYMCPGIFDFLRYAHAKPRPTYVLVTVNSLARAVVFTEDHMLVFD PHSSAECHNAAVYHCEGLHQVLMVLTGFGVQLSPAFYYEALFLYMLDVATVPEAEIAA RLVSTYRDRDIDLTGVVRESADTAATTTTAAPSLPPLPDPIVDPGCPPGVAPSIPVYD PSSSPKKTPEKRRKDLSGSKHGGKKKPPSTTSKTLATASSSPSAIAAASSSSAVPPSY SCGEGALPALGRYQQLVDEVEQELKALTLPPLPANTSAWTLHAAGTESGANAATATAP …
70243	SNV	C	A	0.0397373	5	13	38.4615	1	17	5.88235		No	UL48	HHV5wtgp052	complexed with tegument protein UL37; ubiquitin-specific protease (N-terminal region); involved in capsid transport	large tegument protein	AAR31613.1	GI:39842069	MKVTQASCHQGDIARFGARAGNQCVCNGIMFLHALHLGGTSAVL QTEALDAIMEEGARLDARLERELQKKLPAGGRLPVYRLGDEVPRRLESRFGRTVHALS RPFNGTTETCDLDGYMCPGIFDFLRYAHAKPRPTYVLVTVNSLARAVVFTEDHMLVFD PHSSAECHNAAVYHCEGLHQVLMVLTGFGVQLSPAFYYEALFLYMLDVATVPEAEIAA RLVSTYRDRDIDLTGVVRESADTAATTTTAAPSLPPLPDPIVDPGCPPGVAPSIPVYD PSSSPKKTPEKRRKDLSGSKHGGKKKPPSTTSKTLATASSSPSAIAAASSSSAVPPSY SCGEGALPALGRYQQLVDEVEQELKALTLPPLPANTSAWTLHAAGTESGANAATATAP …
70303	SNV	G	A	0.0178911	8	13	61.5385	3	17	17.6471		No	UL48	HHV5wtgp052	complexed with tegument protein UL37; ubiquitin-specific protease (N-terminal region); involved in capsid transport	large tegument protein	AAR31613.1	GI:39842069	MKVTQASCHQGDIARFGARAGNQCVCNGIMFLHALHLGGTSAVL QTEALDAIMEEGARLDARLERELQKKLPAGGRLPVYRLGDEVPRRLESRFGRTVHALS RPFNGTTETCDLDGYMCPGIFDFLRYAHAKPRPTYVLVTVNSLARAVVFTEDHMLVFD PHSSAECHNAAVYHCEGLHQVLMVLTGFGVQLSPAFYYEALFLYMLDVATVPEAEIAA RLVSTYRDRDIDLTGVVRESADTAATTTTAAPSLPPLPDPIVDPGCPPGVAPSIPVYD PSSSPKKTPEKRRKDLSGSKHGGKKKPPSTTSKTLATASSSPSAIAAASSSSAVPPSY SCGEGALPALGRYQQLVDEVEQELKALTLPPLPANTSAWTLHAAGTESGANAATATAP …
70378	SNV	C	T	0.0397373	5	13	38.4615	1	17	5.88235		No	UL48	HHV5wtgp052	complexed with tegument protein UL37; ubiquitin-specific protease (N-terminal region); involved in capsid transport	large tegument protein	AAR31613.1	GI:39842069	MKVTQASCHQGDIARFGARAGNQCVCNGIMFLHALHLGGTSAVL QTEALDAIMEEGARLDARLERELQKKLPAGGRLPVYRLGDEVPRRLESRFGRTVHALS RPFNGTTETCDLDGYMCPGIFDFLRYAHAKPRPTYVLVTVNSLARAVVFTEDHMLVFD PHSSAECHNAAVYHCEGLHQVLMVLTGFGVQLSPAFYYEALFLYMLDVATVPEAEIAA RLVSTYRDRDIDLTGVVRESADTAATTTTAAPSLPPLPDPIVDPGCPPGVAPSIPVYD PSSSPKKTPEKRRKDLSGSKHGGKKKPPSTTSKTLATASSSPSAIAAASSSSAVPPSY SCGEGALPALGRYQQLVDEVEQELKALTLPPLPANTSAWTLHAAGTESGANAATATAP …
70381	SNV	A	G	0.00608643	9	13	69.2308	3	17	17.6471		No	UL48	HHV5wtgp052	complexed with tegument protein UL37; ubiquitin-specific protease (N-terminal region); involved in capsid transport	large tegument protein	AAR31613.1	GI:39842069	MKVTQASCHQGDIARFGARAGNQCVCNGIMFLHALHLGGTSAVL QTEALDAIMEEGARLDARLERELQKKLPAGGRLPVYRLGDEVPRRLESRFGRTVHALS RPFNGTTETCDLDGYMCPGIFDFLRYAHAKPRPTYVLVTVNSLARAVVFTEDHMLVFD PHSSAECHNAAVYHCEGLHQVLMVLTGFGVQLSPAFYYEALFLYMLDVATVPEAEIAA RLVSTYRDRDIDLTGVVRESADTAATTTTAAPSLPPLPDPIVDPGCPPGVAPSIPVYD PSSSPKKTPEKRRKDLSGSKHGGKKKPPSTTSKTLATASSSPSAIAAASSSSAVPPSY SCGEGALPALGRYQQLVDEVEQELKALTLPPLPANTSAWTLHAAGTESGANAATATAP …
70414	SNV	A	G	0.0434227	13	13	100	12	17	70.5882		No	UL48	HHV5wtgp052	complexed with tegument protein UL37; ubiquitin-specific protease (N-terminal region); involved in capsid transport	large tegument protein	AAR31613.1	GI:39842069	MKVTQASCHQGDIARFGARAGNQCVCNGIMFLHALHLGGTSAVL QTEALDAIMEEGARLDARLERELQKKLPAGGRLPVYRLGDEVPRRLESRFGRTVHALS RPFNGTTETCDLDGYMCPGIFDFLRYAHAKPRPTYVLVTVNSLARAVVFTEDHMLVFD PHSSAECHNAAVYHCEGLHQVLMVLTGFGVQLSPAFYYEALFLYMLDVATVPEAEIAA RLVSTYRDRDIDLTGVVRESADTAATTTTAAPSLPPLPDPIVDPGCPPGVAPSIPVYD PSSSPKKTPEKRRKDLSGSKHGGKKKPPSTTSKTLATASSSPSAIAAASSSSAVPPSY SCGEGALPALGRYQQLVDEVEQELKALTLPPLPANTSAWTLHAAGTESGANAATATAP …
70420	SNV	A	G	0.0397373	5	13	38.4615	1	17	5.88235		No	UL48	HHV5wtgp052	complexed with tegument protein UL37; ubiquitin-specific protease (N-terminal region); involved in capsid transport	large tegument protein	AAR31613.1	GI:39842069	MKVTQASCHQGDIARFGARAGNQCVCNGIMFLHALHLGGTSAVL QTEALDAIMEEGARLDARLERELQKKLPAGGRLPVYRLGDEVPRRLESRFGRTVHALS RPFNGTTETCDLDGYMCPGIFDFLRYAHAKPRPTYVLVTVNSLARAVVFTEDHMLVFD PHSSAECHNAAVYHCEGLHQVLMVLTGFGVQLSPAFYYEALFLYMLDVATVPEAEIAA RLVSTYRDRDIDLTGVVRESADTAATTTTAAPSLPPLPDPIVDPGCPPGVAPSIPVYD PSSSPKKTPEKRRKDLSGSKHGGKKKPPSTTSKTLATASSSPSAIAAASSSSAVPPSY SCGEGALPALGRYQQLVDEVEQELKALTLPPLPANTSAWTLHAAGTESGANAATATAP …
70513	SNV	C	T	0.0151724	6	13	46.1538	1	17	5.88235		No	UL48	HHV5wtgp052	complexed with tegument protein UL37; ubiquitin-specific protease (N-terminal region); involved in capsid transport	large tegument protein	AAR31613.1	GI:39842069	MKVTQASCHQGDIARFGARAGNQCVCNGIMFLHALHLGGTSAVL QTEALDAIMEEGARLDARLERELQKKLPAGGRLPVYRLGDEVPRRLESRFGRTVHALS RPFNGTTETCDLDGYMCPGIFDFLRYAHAKPRPTYVLVTVNSLARAVVFTEDHMLVFD PHSSAECHNAAVYHCEGLHQVLMVLTGFGVQLSPAFYYEALFLYMLDVATVPEAEIAA RLVSTYRDRDIDLTGVVRESADTAATTTTAAPSLPPLPDPIVDPGCPPGVAPSIPVYD PSSSPKKTPEKRRKDLSGSKHGGKKKPPSTTSKTLATASSSPSAIAAASSSSAVPPSY SCGEGALPALGRYQQLVDEVEQELKALTLPPLPANTSAWTLHAAGTESGANAATATAP …
70541	SNV	G	A	0.0151724	6	13	46.1538	1	17	5.88235	AAR31613.1:p.Val1973Ile	Yes	UL48	HHV5wtgp052	complexed with tegument protein UL37; ubiquitin-specific protease (N-terminal region); involved in capsid transport	large tegument protein	AAR31613.1	GI:39842069	MKVTQASCHQGDIARFGARAGNQCVCNGIMFLHALHLGGTSAVL QTEALDAIMEEGARLDARLERELQKKLPAGGRLPVYRLGDEVPRRLESRFGRTVHALS RPFNGTTETCDLDGYMCPGIFDFLRYAHAKPRPTYVLVTVNSLARAVVFTEDHMLVFD PHSSAECHNAAVYHCEGLHQVLMVLTGFGVQLSPAFYYEALFLYMLDVATVPEAEIAA RLVSTYRDRDIDLTGVVRESADTAATTTTAAPSLPPLPDPIVDPGCPPGVAPSIPVYD PSSSPKKTPEKRRKDLSGSKHGGKKKPPSTTSKTLATASSSPSAIAAASSSSAVPPSY SCGEGALPALGRYQQLVDEVEQELKALTLPPLPANTSAWTLHAAGTESGANAATATAP …
70544	SNV	T	C	0.00187049	9	13	69.2308	2	17	11.7647		No	UL48	HHV5wtgp052	complexed with tegument protein UL37; ubiquitin-specific protease (N-terminal region); involved in capsid transport	large tegument protein	AAR31613.1	GI:39842069	MKVTQASCHQGDIARFGARAGNQCVCNGIMFLHALHLGGTSAVL QTEALDAIMEEGARLDARLERELQKKLPAGGRLPVYRLGDEVPRRLESRFGRTVHALS RPFNGTTETCDLDGYMCPGIFDFLRYAHAKPRPTYVLVTVNSLARAVVFTEDHMLVFD PHSSAECHNAAVYHCEGLHQVLMVLTGFGVQLSPAFYYEALFLYMLDVATVPEAEIAA RLVSTYRDRDIDLTGVVRESADTAATTTTAAPSLPPLPDPIVDPGCPPGVAPSIPVYD PSSSPKKTPEKRRKDLSGSKHGGKKKPPSTTSKTLATASSSPSAIAAASSSSAVPPSY SCGEGALPALGRYQQLVDEVEQELKALTLPPLPANTSAWTLHAAGTESGANAATATAP …
70612	SNV	C	T	0.0090312	5	13	38.4615	0	17	0		No	UL48	HHV5wtgp052	complexed with tegument protein UL37; ubiquitin-specific protease (N-terminal region); involved in capsid transport	large tegument protein	AAR31613.1	GI:39842069	MKVTQASCHQGDIARFGARAGNQCVCNGIMFLHALHLGGTSAVL QTEALDAIMEEGARLDARLERELQKKLPAGGRLPVYRLGDEVPRRLESRFGRTVHALS RPFNGTTETCDLDGYMCPGIFDFLRYAHAKPRPTYVLVTVNSLARAVVFTEDHMLVFD PHSSAECHNAAVYHCEGLHQVLMVLTGFGVQLSPAFYYEALFLYMLDVATVPEAEIAA RLVSTYRDRDIDLTGVVRESADTAATTTTAAPSLPPLPDPIVDPGCPPGVAPSIPVYD PSSSPKKTPEKRRKDLSGSKHGGKKKPPSTTSKTLATASSSPSAIAAASSSSAVPPSY SCGEGALPALGRYQQLVDEVEQELKALTLPPLPANTSAWTLHAAGTESGANAATATAP …
70771	SNV	T	C	0.0278761	10	13	76.9231	6	17	35.2941		No	UL48	HHV5wtgp052	complexed with tegument protein UL37; ubiquitin-specific protease (N-terminal region); involved in capsid transport	large tegument protein	AAR31613.1	GI:39842069	MKVTQASCHQGDIARFGARAGNQCVCNGIMFLHALHLGGTSAVL QTEALDAIMEEGARLDARLERELQKKLPAGGRLPVYRLGDEVPRRLESRFGRTVHALS RPFNGTTETCDLDGYMCPGIFDFLRYAHAKPRPTYVLVTVNSLARAVVFTEDHMLVFD PHSSAECHNAAVYHCEGLHQVLMVLTGFGVQLSPAFYYEALFLYMLDVATVPEAEIAA RLVSTYRDRDIDLTGVVRESADTAATTTTAAPSLPPLPDPIVDPGCPPGVAPSIPVYD PSSSPKKTPEKRRKDLSGSKHGGKKKPPSTTSKTLATASSSPSAIAAASSSSAVPPSY SCGEGALPALGRYQQLVDEVEQELKALTLPPLPANTSAWTLHAAGTESGANAATATAP …
71140..71141	MNV	GC	AT	0.0415003	8	13	61.5385	4	17	23.5294		No	UL48	HHV5wtgp052	complexed with tegument protein UL37; ubiquitin-specific protease (N-terminal region); involved in capsid transport	large tegument protein	AAR31613.1	GI:39842069	MKVTQASCHQGDIARFGARAGNQCVCNGIMFLHALHLGGTSAVL QTEALDAIMEEGARLDARLERELQKKLPAGGRLPVYRLGDEVPRRLESRFGRTVHALS RPFNGTTETCDLDGYMCPGIFDFLRYAHAKPRPTYVLVTVNSLARAVVFTEDHMLVFD PHSSAECHNAAVYHCEGLHQVLMVLTGFGVQLSPAFYYEALFLYMLDVATVPEAEIAA RLVSTYRDRDIDLTGVVRESADTAATTTTAAPSLPPLPDPIVDPGCPPGVAPSIPVYD PSSSPKKTPEKRRKDLSGSKHGGKKKPPSTTSKTLATASSSPSAIAAASSSSAVPPSY SCGEGALPALGRYQQLVDEVEQELKALTLPPLPANTSAWTLHAAGTESGANAATATAP …
71176	SNV	G	T	0.0397373	5	13	38.4615	1	17	5.88235		No	UL48	HHV5wtgp052	complexed with tegument protein UL37; ubiquitin-specific protease (N-terminal region); involved in capsid transport	large tegument protein	AAR31613.1	GI:39842069	MKVTQASCHQGDIARFGARAGNQCVCNGIMFLHALHLGGTSAVL QTEALDAIMEEGARLDARLERELQKKLPAGGRLPVYRLGDEVPRRLESRFGRTVHALS RPFNGTTETCDLDGYMCPGIFDFLRYAHAKPRPTYVLVTVNSLARAVVFTEDHMLVFD PHSSAECHNAAVYHCEGLHQVLMVLTGFGVQLSPAFYYEALFLYMLDVATVPEAEIAA RLVSTYRDRDIDLTGVVRESADTAATTTTAAPSLPPLPDPIVDPGCPPGVAPSIPVYD PSSSPKKTPEKRRKDLSGSKHGGKKKPPSTTSKTLATASSSPSAIAAASSSSAVPPSY SCGEGALPALGRYQQLVDEVEQELKALTLPPLPANTSAWTLHAAGTESGANAATATAP …
71406	SNV	A	T	0.0415003	8	13	61.5385	4	17	23.5294		-
71420	SNV	G	A	0.0415003	8	13	61.5385	4	17	23.5294		-
71451	SNV	A	C	0.0415003	8	13	61.5385	4	17	23.5294		-
71451..71452	MNV	AC	CT	0.0450775	7	13	53.8462	3	17	17.6471		-
71461	SNV	A	G	0.0450775	6	13	46.1538	2	17	11.7647		-
71655	SNV	C	T	0.0450775	6	13	46.1538	2	17	11.7647		No	UL48A	HHV5wtgp053	located externally on capsid hexons; involved in capsid morphogenesis; possibly involved in capsid transport	small capsid protein	AAR31612.1	GI:39842068	MSNTAPGPTVANKRDEKHRHVVNVVLELPTEISEATHPVLATML SKYTRMSSLFNDKCAFKLDLLRMIAVSRTRR
72145	SNV	T	C	0.00505771	10	13	76.9231	4	17	23.5294		No	UL49	HHV5wtgp054		protein UL49	AAR31614.1	GI:39842070	MANRRLRHAPHTATDEFHQALRRLFAPLCVHEDHFHVQLVIGRG ALQPEEAAVETSQPPAQFAAQTSAVLQQQLVHHVPRSCVLHLFVTDKRFLNRELGDRL YQRFLREWLVCRQAEREAVTALFQRMVMTKPYFVFLAYVYSMDCLHTVAVRTMAFLRF ERYDTDYLLRRLRLYPPERLHALLDGVTVSLLGDLHRFLFGVDLRLPVLHPTSSPCLA LLRAKRFDARADLAVYHRNQWCHQRQPRSPQLRGLIAALRRHAGKVPCGNPLYVLARQ AVQTFCDTCPRYLVPLRALGLHDETRGGGSTAAAAAVGHAGAGQQAHHVEPTKIVLFA LSAALRGGLIGSVIDLPLWCLCRLKCERHLDARSLVAVVCRQCGHCLNLGKEKLHCQQ …
72223	SNV	A	G	0.00353648	11	13	84.6154	5	17	29.4118		No	UL49	HHV5wtgp054		protein UL49	AAR31614.1	GI:39842070	MANRRLRHAPHTATDEFHQALRRLFAPLCVHEDHFHVQLVIGRG ALQPEEAAVETSQPPAQFAAQTSAVLQQQLVHHVPRSCVLHLFVTDKRFLNRELGDRL YQRFLREWLVCRQAEREAVTALFQRMVMTKPYFVFLAYVYSMDCLHTVAVRTMAFLRF ERYDTDYLLRRLRLYPPERLHALLDGVTVSLLGDLHRFLFGVDLRLPVLHPTSSPCLA LLRAKRFDARADLAVYHRNQWCHQRQPRSPQLRGLIAALRRHAGKVPCGNPLYVLARQ AVQTFCDTCPRYLVPLRALGLHDETRGGGSTAAAAAVGHAGAGQQAHHVEPTKIVLFA LSAALRGGLIGSVIDLPLWCLCRLKCERHLDARSLVAVVCRQCGHCLNLGKEKLHCQQ …
72615	SNV	T	G	0.0354823	9	13	69.2308	5	17	29.4118	AAR31614.1:p.Lys263Gln	Yes	UL49	HHV5wtgp054		protein UL49	AAR31614.1	GI:39842070	MANRRLRHAPHTATDEFHQALRRLFAPLCVHEDHFHVQLVIGRG ALQPEEAAVETSQPPAQFAAQTSAVLQQQLVHHVPRSCVLHLFVTDKRFLNRELGDRL YQRFLREWLVCRQAEREAVTALFQRMVMTKPYFVFLAYVYSMDCLHTVAVRTMAFLRF ERYDTDYLLRRLRLYPPERLHALLDGVTVSLLGDLHRFLFGVDLRLPVLHPTSSPCLA LLRAKRFDARADLAVYHRNQWCHQRQPRSPQLRGLIAALRRHAGKVPCGNPLYVLARQ AVQTFCDTCPRYLVPLRALGLHDETRGGGSTAAAAAVGHAGAGQQAHHVEPTKIVLFA LSAALRGGLIGSVIDLPLWCLCRLKCERHLDARSLVAVVCRQCGHCLNLGKEKLHCQQ …
73433	SNV	A	G	0.0450775	6	13	46.1538	2	17	11.7647		No	UL50	HHV5wtgp055	type 2 membrane protein; interacts with nuclear egress lamina protein; involved in nuclear egress	nuclear egress membrane protein	AAR31616.1	GI:39842072	MEMNKVLHQDLVQATRRILKLGPSELRVTDAGLICKNPNYSVCD AMLKTDTVYCVEYLLSYWESRTDHVPCFIFKNTGCAVSLCCFVRAPVKLVSPARHVGE FNVLKVNESLIVTLKDIEEIKPSAYGVLTKCVVRKSNSASVFNIELIAFGPENEGEYE NLLRELYAKKAASTSLAVRNHVTVSSHSGSGPSLWRARMSAALTRTAGKRSPRTASPP PPPPRHPSCSPTMVAAGGAAAGPRPPPPPMAAGSWRLCRCEACMGRCGCASEGDADEE EEELLALAGEGKAAAAAAGQDIGGSARRPLEEHVSRRRGVSTHHRHPPSPPCTPSLER TGYRWAPSSWWRARSGPSRPQSGPWLPARFATLGPLVLALLLVLALLWRGHGQSSSPT …
73463	SNV	A	G	0.0450775	6	13	46.1538	2	17	11.7647		No	UL50	HHV5wtgp055	type 2 membrane protein; interacts with nuclear egress lamina protein; involved in nuclear egress	nuclear egress membrane protein	AAR31616.1	GI:39842072	MEMNKVLHQDLVQATRRILKLGPSELRVTDAGLICKNPNYSVCD AMLKTDTVYCVEYLLSYWESRTDHVPCFIFKNTGCAVSLCCFVRAPVKLVSPARHVGE FNVLKVNESLIVTLKDIEEIKPSAYGVLTKCVVRKSNSASVFNIELIAFGPENEGEYE NLLRELYAKKAASTSLAVRNHVTVSSHSGSGPSLWRARMSAALTRTAGKRSPRTASPP PPPPRHPSCSPTMVAAGGAAAGPRPPPPPMAAGSWRLCRCEACMGRCGCASEGDADEE EEELLALAGEGKAAAAAAGQDIGGSARRPLEEHVSRRRGVSTHHRHPPSPPCTPSLER TGYRWAPSSWWRARSGPSRPQSGPWLPARFATLGPLVLALLLVLALLWRGHGQSSSPT …
73887	SNV	C	T	0.0151724	6	13	46.1538	1	17	5.88235	AAR31616.1:p.Arg223His	Yes	UL50	HHV5wtgp055	type 2 membrane protein; interacts with nuclear egress lamina protein; involved in nuclear egress	nuclear egress membrane protein	AAR31616.1	GI:39842072	MEMNKVLHQDLVQATRRILKLGPSELRVTDAGLICKNPNYSVCD AMLKTDTVYCVEYLLSYWESRTDHVPCFIFKNTGCAVSLCCFVRAPVKLVSPARHVGE FNVLKVNESLIVTLKDIEEIKPSAYGVLTKCVVRKSNSASVFNIELIAFGPENEGEYE NLLRELYAKKAASTSLAVRNHVTVSSHSGSGPSLWRARMSAALTRTAGKRSPRTASPP PPPPRHPSCSPTMVAAGGAAAGPRPPPPPMAAGSWRLCRCEACMGRCGCASEGDADEE EEELLALAGEGKAAAAAAGQDIGGSARRPLEEHVSRRRGVSTHHRHPPSPPCTPSLER TGYRWAPSSWWRARSGPSRPQSGPWLPARFATLGPLVLALLLVLALLWRGHGQSSSPT …
76394	Deletion	G	-	0.0450775	6	13	46.1538	2	17	11.7647	AAR31618.1:p.Asn437fs	Yes	UL52	HHV5wtgp057	involved in DNA encapsidation; possibly involved in capsid transport	DNA packaging protein UL32	AAR31618.1	GI:39842074	MNPSTHVSSNGPTTPPHGPHTTFLPPTSPAPSTSSVAAATLCSP QRQAVSRYSGWSTEYTQWHSDLTTELLWHAHPRQVPMDEALAAAAAASYQVNPQHPAN RYRHYEFQTLSLGTSEVDELLNCCAEETTCGGTQSTVLTNATNTTSCGGAVAGSSNAG PAGASAACDLDAELAGLETSAADFEQLRRLCAPLAIDTRCNLCAIISICLKQDCDQSW LLEYSLLCFKCSYAPRAALSTLIIMSEFTHLLQQHFSDLRIDDLFRHHVLTVFDFHLH FFINRCFEKQVGDAVDNENVTLNHLAVVRAMVMGEDTVPYNKPRRHPQQKQKNNPYHV EVPQELIDNFLEHSSPSRDRFVQLLFYMWAGTGVMSTTPLTELTHTKFARLDALSTAS …
76628	SNV	G	A	0.0397373	5	13	38.4615	1	17	5.88235		No	UL52	HHV5wtgp057	involved in DNA encapsidation; possibly involved in capsid transport	DNA packaging protein UL32	AAR31618.1	GI:39842074	MNPSTHVSSNGPTTPPHGPHTTFLPPTSPAPSTSSVAAATLCSP QRQAVSRYSGWSTEYTQWHSDLTTELLWHAHPRQVPMDEALAAAAAASYQVNPQHPAN RYRHYEFQTLSLGTSEVDELLNCCAEETTCGGTQSTVLTNATNTTSCGGAVAGSSNAG PAGASAACDLDAELAGLETSAADFEQLRRLCAPLAIDTRCNLCAIISICLKQDCDQSW LLEYSLLCFKCSYAPRAALSTLIIMSEFTHLLQQHFSDLRIDDLFRHHVLTVFDFHLH FFINRCFEKQVGDAVDNENVTLNHLAVVRAMVMGEDTVPYNKPRRHPQQKQKNNPYHV EVPQELIDNFLEHSSPSRDRFVQLLFYMWAGTGVMSTTPLTELTHTKFARLDALSTAS …
77637	SNV	T	C	0.00608643	9	13	69.2308	3	17	17.6471		No	UL53	HHV5wtgp058	interacts with nuclear egress membrane protein; involved in nuclear egress	nuclear egress lamina protein	AAR31617.1	GI:39842073	MSSVSGVRTPRERRSALRSLLRKRRQRELASKVASTVNGATSAN NHGEPPSPADARPRLTLHDLHDIFREHPELELKYLNMMKMAITGKESICLPFNFHSHR QHTCLDISPYGNEQVSRIACTSCEDNRILPTASDAMVAFINQTSNIMKNRNFYYGFCK SSELLKLSTNQPPIFQIYYLLHAANHDIVPFMHAENGRLHMHVIFENSDVHIPCDCIT QMLTAAREDYSVTLNIVRDHVVISVLCHAVSASSVKIDVTILQRKIDEMDIPNDVSES FERYKELIQELCQSSGNNLYEEATSSYAIRSPLTASPLHVVSTNGCGPSSSSQSTPPH LHPPSQATQPHHYSHHQSQSQQHHHRPQSPPPPLFLNSIRAP
78721	SNV	A	G	0.0450775	6	13	46.1538	2	17	11.7647		No	UL54	HHV5wtgp059	involved in DNA replication	DNA polymerase catalytic subunit	AAR31619.1	GI:39842075	MFFNPYLSGGVTGGAVAGGRRQRSQPGSAQGSGKRPPQKQFLQI VPRGVMFDGQTGLIKHKTGRLPLMFYREIKHLLSHDMVWPCPWRETLVGRVVGPIRFH TYDQTDAVLFFDSPENVSPRYRQHLVPSGNVLRFFGATEHGYSICVNVFGQRSYFYCE YSDTDRLREVIASVGELVPEPRTPYAVSVTPATKTSIYGYGTRPVPDLQCVSISNWTM ARKIGEYLLEQGFPVYEVRVDPLTRLVIDRRITTFGWCSVNRYDWRQQGRASTCDIEV DCDVSDLVAVPDDSSWPRYRCLSFDIECMSGEGGFPCAEKSDDIVIQISCVCYETGGN TAVDQGIPNGNDGRGCTSEGVIFGHSGLHLFTIGTCGQVGPDVDVYEFPSEYELLLGF …
78737	SNV	A	G	0.0450775	6	13	46.1538	2	17	11.7647		No	UL54	HHV5wtgp059	involved in DNA replication	DNA polymerase catalytic subunit	AAR31619.1	GI:39842075	MFFNPYLSGGVTGGAVAGGRRQRSQPGSAQGSGKRPPQKQFLQI VPRGVMFDGQTGLIKHKTGRLPLMFYREIKHLLSHDMVWPCPWRETLVGRVVGPIRFH TYDQTDAVLFFDSPENVSPRYRQHLVPSGNVLRFFGATEHGYSICVNVFGQRSYFYCE YSDTDRLREVIASVGELVPEPRTPYAVSVTPATKTSIYGYGTRPVPDLQCVSISNWTM ARKIGEYLLEQGFPVYEVRVDPLTRLVIDRRITTFGWCSVNRYDWRQQGRASTCDIEV DCDVSDLVAVPDDSSWPRYRCLSFDIECMSGEGGFPCAEKSDDIVIQISCVCYETGGN TAVDQGIPNGNDGRGCTSEGVIFGHSGLHLFTIGTCGQVGPDVDVYEFPSEYELLLGF …
78808	SNV	G	A	0.0450775	6	13	46.1538	2	17	11.7647		No	UL54	HHV5wtgp059	involved in DNA replication	DNA polymerase catalytic subunit	AAR31619.1	GI:39842075	MFFNPYLSGGVTGGAVAGGRRQRSQPGSAQGSGKRPPQKQFLQI VPRGVMFDGQTGLIKHKTGRLPLMFYREIKHLLSHDMVWPCPWRETLVGRVVGPIRFH TYDQTDAVLFFDSPENVSPRYRQHLVPSGNVLRFFGATEHGYSICVNVFGQRSYFYCE YSDTDRLREVIASVGELVPEPRTPYAVSVTPATKTSIYGYGTRPVPDLQCVSISNWTM ARKIGEYLLEQGFPVYEVRVDPLTRLVIDRRITTFGWCSVNRYDWRQQGRASTCDIEV DCDVSDLVAVPDDSSWPRYRCLSFDIECMSGEGGFPCAEKSDDIVIQISCVCYETGGN TAVDQGIPNGNDGRGCTSEGVIFGHSGLHLFTIGTCGQVGPDVDVYEFPSEYELLLGF …
78815	SNV	C	T	0.0450775	6	13	46.1538	2	17	11.7647		No	UL54	HHV5wtgp059	involved in DNA replication	DNA polymerase catalytic subunit	AAR31619.1	GI:39842075	MFFNPYLSGGVTGGAVAGGRRQRSQPGSAQGSGKRPPQKQFLQI VPRGVMFDGQTGLIKHKTGRLPLMFYREIKHLLSHDMVWPCPWRETLVGRVVGPIRFH TYDQTDAVLFFDSPENVSPRYRQHLVPSGNVLRFFGATEHGYSICVNVFGQRSYFYCE YSDTDRLREVIASVGELVPEPRTPYAVSVTPATKTSIYGYGTRPVPDLQCVSISNWTM ARKIGEYLLEQGFPVYEVRVDPLTRLVIDRRITTFGWCSVNRYDWRQQGRASTCDIEV DCDVSDLVAVPDDSSWPRYRCLSFDIECMSGEGGFPCAEKSDDIVIQISCVCYETGGN TAVDQGIPNGNDGRGCTSEGVIFGHSGLHLFTIGTCGQVGPDVDVYEFPSEYELLLGF …
78848	SNV	T	C	0.0450775	6	13	46.1538	2	17	11.7647		No	UL54	HHV5wtgp059	involved in DNA replication	DNA polymerase catalytic subunit	AAR31619.1	GI:39842075	MFFNPYLSGGVTGGAVAGGRRQRSQPGSAQGSGKRPPQKQFLQI VPRGVMFDGQTGLIKHKTGRLPLMFYREIKHLLSHDMVWPCPWRETLVGRVVGPIRFH TYDQTDAVLFFDSPENVSPRYRQHLVPSGNVLRFFGATEHGYSICVNVFGQRSYFYCE YSDTDRLREVIASVGELVPEPRTPYAVSVTPATKTSIYGYGTRPVPDLQCVSISNWTM ARKIGEYLLEQGFPVYEVRVDPLTRLVIDRRITTFGWCSVNRYDWRQQGRASTCDIEV DCDVSDLVAVPDDSSWPRYRCLSFDIECMSGEGGFPCAEKSDDIVIQISCVCYETGGN TAVDQGIPNGNDGRGCTSEGVIFGHSGLHLFTIGTCGQVGPDVDVYEFPSEYELLLGF …
79604	SNV	A	G	0.0260901	4	13	30.7692	0	17	0		No	UL54	HHV5wtgp059	involved in DNA replication	DNA polymerase catalytic subunit	AAR31619.1	GI:39842075	MFFNPYLSGGVTGGAVAGGRRQRSQPGSAQGSGKRPPQKQFLQI VPRGVMFDGQTGLIKHKTGRLPLMFYREIKHLLSHDMVWPCPWRETLVGRVVGPIRFH TYDQTDAVLFFDSPENVSPRYRQHLVPSGNVLRFFGATEHGYSICVNVFGQRSYFYCE YSDTDRLREVIASVGELVPEPRTPYAVSVTPATKTSIYGYGTRPVPDLQCVSISNWTM ARKIGEYLLEQGFPVYEVRVDPLTRLVIDRRITTFGWCSVNRYDWRQQGRASTCDIEV DCDVSDLVAVPDDSSWPRYRCLSFDIECMSGEGGFPCAEKSDDIVIQISCVCYETGGN TAVDQGIPNGNDGRGCTSEGVIFGHSGLHLFTIGTCGQVGPDVDVYEFPSEYELLLGF …
80066	SNV	G	A	0.00608643	9	13	69.2308	3	17	17.6471		No	UL54	HHV5wtgp059	involved in DNA replication	DNA polymerase catalytic subunit	AAR31619.1	GI:39842075	MFFNPYLSGGVTGGAVAGGRRQRSQPGSAQGSGKRPPQKQFLQI VPRGVMFDGQTGLIKHKTGRLPLMFYREIKHLLSHDMVWPCPWRETLVGRVVGPIRFH TYDQTDAVLFFDSPENVSPRYRQHLVPSGNVLRFFGATEHGYSICVNVFGQRSYFYCE YSDTDRLREVIASVGELVPEPRTPYAVSVTPATKTSIYGYGTRPVPDLQCVSISNWTM ARKIGEYLLEQGFPVYEVRVDPLTRLVIDRRITTFGWCSVNRYDWRQQGRASTCDIEV DCDVSDLVAVPDDSSWPRYRCLSFDIECMSGEGGFPCAEKSDDIVIQISCVCYETGGN TAVDQGIPNGNDGRGCTSEGVIFGHSGLHLFTIGTCGQVGPDVDVYEFPSEYELLLGF …
80081	SNV	G	A	0.0178911	8	13	61.5385	3	17	17.6471		No	UL54	HHV5wtgp059	involved in DNA replication	DNA polymerase catalytic subunit	AAR31619.1	GI:39842075	MFFNPYLSGGVTGGAVAGGRRQRSQPGSAQGSGKRPPQKQFLQI VPRGVMFDGQTGLIKHKTGRLPLMFYREIKHLLSHDMVWPCPWRETLVGRVVGPIRFH TYDQTDAVLFFDSPENVSPRYRQHLVPSGNVLRFFGATEHGYSICVNVFGQRSYFYCE YSDTDRLREVIASVGELVPEPRTPYAVSVTPATKTSIYGYGTRPVPDLQCVSISNWTM ARKIGEYLLEQGFPVYEVRVDPLTRLVIDRRITTFGWCSVNRYDWRQQGRASTCDIEV DCDVSDLVAVPDDSSWPRYRCLSFDIECMSGEGGFPCAEKSDDIVIQISCVCYETGGN TAVDQGIPNGNDGRGCTSEGVIFGHSGLHLFTIGTCGQVGPDVDVYEFPSEYELLLGF …
80372	SNV	G	A	0.00520406	7	13	53.8462	1	17	5.88235		No	UL54	HHV5wtgp059	involved in DNA replication	DNA polymerase catalytic subunit	AAR31619.1	GI:39842075	MFFNPYLSGGVTGGAVAGGRRQRSQPGSAQGSGKRPPQKQFLQI VPRGVMFDGQTGLIKHKTGRLPLMFYREIKHLLSHDMVWPCPWRETLVGRVVGPIRFH TYDQTDAVLFFDSPENVSPRYRQHLVPSGNVLRFFGATEHGYSICVNVFGQRSYFYCE YSDTDRLREVIASVGELVPEPRTPYAVSVTPATKTSIYGYGTRPVPDLQCVSISNWTM ARKIGEYLLEQGFPVYEVRVDPLTRLVIDRRITTFGWCSVNRYDWRQQGRASTCDIEV DCDVSDLVAVPDDSSWPRYRCLSFDIECMSGEGGFPCAEKSDDIVIQISCVCYETGGN TAVDQGIPNGNDGRGCTSEGVIFGHSGLHLFTIGTCGQVGPDVDVYEFPSEYELLLGF …
80420	SNV	G	A	0.0090312	5	13	38.4615	0	17	0		No	UL54	HHV5wtgp059	involved in DNA replication	DNA polymerase catalytic subunit	AAR31619.1	GI:39842075	MFFNPYLSGGVTGGAVAGGRRQRSQPGSAQGSGKRPPQKQFLQI VPRGVMFDGQTGLIKHKTGRLPLMFYREIKHLLSHDMVWPCPWRETLVGRVVGPIRFH TYDQTDAVLFFDSPENVSPRYRQHLVPSGNVLRFFGATEHGYSICVNVFGQRSYFYCE YSDTDRLREVIASVGELVPEPRTPYAVSVTPATKTSIYGYGTRPVPDLQCVSISNWTM ARKIGEYLLEQGFPVYEVRVDPLTRLVIDRRITTFGWCSVNRYDWRQQGRASTCDIEV DCDVSDLVAVPDDSSWPRYRCLSFDIECMSGEGGFPCAEKSDDIVIQISCVCYETGGN TAVDQGIPNGNDGRGCTSEGVIFGHSGLHLFTIGTCGQVGPDVDVYEFPSEYELLLGF …
80663	SNV	G	A	0.0354823	9	13	69.2308	5	17	29.4118		No	UL54	HHV5wtgp059	involved in DNA replication	DNA polymerase catalytic subunit	AAR31619.1	GI:39842075	MFFNPYLSGGVTGGAVAGGRRQRSQPGSAQGSGKRPPQKQFLQI VPRGVMFDGQTGLIKHKTGRLPLMFYREIKHLLSHDMVWPCPWRETLVGRVVGPIRFH TYDQTDAVLFFDSPENVSPRYRQHLVPSGNVLRFFGATEHGYSICVNVFGQRSYFYCE YSDTDRLREVIASVGELVPEPRTPYAVSVTPATKTSIYGYGTRPVPDLQCVSISNWTM ARKIGEYLLEQGFPVYEVRVDPLTRLVIDRRITTFGWCSVNRYDWRQQGRASTCDIEV DCDVSDLVAVPDDSSWPRYRCLSFDIECMSGEGGFPCAEKSDDIVIQISCVCYETGGN TAVDQGIPNGNDGRGCTSEGVIFGHSGLHLFTIGTCGQVGPDVDVYEFPSEYELLLGF …
80882	SNV	G	A	0.0278761	10	13	76.9231	6	17	35.2941		No	UL54	HHV5wtgp059	involved in DNA replication	DNA polymerase catalytic subunit	AAR31619.1	GI:39842075	MFFNPYLSGGVTGGAVAGGRRQRSQPGSAQGSGKRPPQKQFLQI VPRGVMFDGQTGLIKHKTGRLPLMFYREIKHLLSHDMVWPCPWRETLVGRVVGPIRFH TYDQTDAVLFFDSPENVSPRYRQHLVPSGNVLRFFGATEHGYSICVNVFGQRSYFYCE YSDTDRLREVIASVGELVPEPRTPYAVSVTPATKTSIYGYGTRPVPDLQCVSISNWTM ARKIGEYLLEQGFPVYEVRVDPLTRLVIDRRITTFGWCSVNRYDWRQQGRASTCDIEV DCDVSDLVAVPDDSSWPRYRCLSFDIECMSGEGGFPCAEKSDDIVIQISCVCYETGGN TAVDQGIPNGNDGRGCTSEGVIFGHSGLHLFTIGTCGQVGPDVDVYEFPSEYELLLGF …
81005	SNV	G	A	0.0397373	5	13	38.4615	1	17	5.88235		No	UL54	HHV5wtgp059	involved in DNA replication	DNA polymerase catalytic subunit	AAR31619.1	GI:39842075	MFFNPYLSGGVTGGAVAGGRRQRSQPGSAQGSGKRPPQKQFLQI VPRGVMFDGQTGLIKHKTGRLPLMFYREIKHLLSHDMVWPCPWRETLVGRVVGPIRFH TYDQTDAVLFFDSPENVSPRYRQHLVPSGNVLRFFGATEHGYSICVNVFGQRSYFYCE YSDTDRLREVIASVGELVPEPRTPYAVSVTPATKTSIYGYGTRPVPDLQCVSISNWTM ARKIGEYLLEQGFPVYEVRVDPLTRLVIDRRITTFGWCSVNRYDWRQQGRASTCDIEV DCDVSDLVAVPDDSSWPRYRCLSFDIECMSGEGGFPCAEKSDDIVIQISCVCYETGGN TAVDQGIPNGNDGRGCTSEGVIFGHSGLHLFTIGTCGQVGPDVDVYEFPSEYELLLGF …
81335	SNV	C	A	0.0090312	5	13	38.4615	0	17	0		No	UL54	HHV5wtgp059	involved in DNA replication	DNA polymerase catalytic subunit	AAR31619.1	GI:39842075	MFFNPYLSGGVTGGAVAGGRRQRSQPGSAQGSGKRPPQKQFLQI VPRGVMFDGQTGLIKHKTGRLPLMFYREIKHLLSHDMVWPCPWRETLVGRVVGPIRFH TYDQTDAVLFFDSPENVSPRYRQHLVPSGNVLRFFGATEHGYSICVNVFGQRSYFYCE YSDTDRLREVIASVGELVPEPRTPYAVSVTPATKTSIYGYGTRPVPDLQCVSISNWTM ARKIGEYLLEQGFPVYEVRVDPLTRLVIDRRITTFGWCSVNRYDWRQQGRASTCDIEV DCDVSDLVAVPDDSSWPRYRCLSFDIECMSGEGGFPCAEKSDDIVIQISCVCYETGGN TAVDQGIPNGNDGRGCTSEGVIFGHSGLHLFTIGTCGQVGPDVDVYEFPSEYELLLGF …
81779	SNV	G	A	0.0178911	8	13	61.5385	3	17	17.6471		No	UL54	HHV5wtgp059	involved in DNA replication	DNA polymerase catalytic subunit	AAR31619.1	GI:39842075	MFFNPYLSGGVTGGAVAGGRRQRSQPGSAQGSGKRPPQKQFLQI VPRGVMFDGQTGLIKHKTGRLPLMFYREIKHLLSHDMVWPCPWRETLVGRVVGPIRFH TYDQTDAVLFFDSPENVSPRYRQHLVPSGNVLRFFGATEHGYSICVNVFGQRSYFYCE YSDTDRLREVIASVGELVPEPRTPYAVSVTPATKTSIYGYGTRPVPDLQCVSISNWTM ARKIGEYLLEQGFPVYEVRVDPLTRLVIDRRITTFGWCSVNRYDWRQQGRASTCDIEV DCDVSDLVAVPDDSSWPRYRCLSFDIECMSGEGGFPCAEKSDDIVIQISCVCYETGGN TAVDQGIPNGNDGRGCTSEGVIFGHSGLHLFTIGTCGQVGPDVDVYEFPSEYELLLGF …
81911	SNV	G	A	0.0090312	5	13	38.4615	0	17	0		No	UL54	HHV5wtgp059	involved in DNA replication	DNA polymerase catalytic subunit	AAR31619.1	GI:39842075	MFFNPYLSGGVTGGAVAGGRRQRSQPGSAQGSGKRPPQKQFLQI VPRGVMFDGQTGLIKHKTGRLPLMFYREIKHLLSHDMVWPCPWRETLVGRVVGPIRFH TYDQTDAVLFFDSPENVSPRYRQHLVPSGNVLRFFGATEHGYSICVNVFGQRSYFYCE YSDTDRLREVIASVGELVPEPRTPYAVSVTPATKTSIYGYGTRPVPDLQCVSISNWTM ARKIGEYLLEQGFPVYEVRVDPLTRLVIDRRITTFGWCSVNRYDWRQQGRASTCDIEV DCDVSDLVAVPDDSSWPRYRCLSFDIECMSGEGGFPCAEKSDDIVIQISCVCYETGGN TAVDQGIPNGNDGRGCTSEGVIFGHSGLHLFTIGTCGQVGPDVDVYEFPSEYELLLGF …
82043..82044	Deletion	TG	-	0.00288998	6	13	46.1538	0	17	0		-
82044	Deletion	G	-	0.0090312	5	13	38.4615	0	17	0		-
82630	SNV	G	A	0.0397373	5	13	38.4615	1	17	5.88235		No	UL55	HHV5wtgp060	type 1 membrane protein; possible membrane fusogen; binds cell surface heparan sulphate; involved in cell entry; involved in cell-to-cell spread	envelope glycoprotein B	AAR31620.1	GI:39842076	MESRIWCLVVCVNLCIVCLGAAVSSSSTRGTSATHSHHSSHTTS AAHSRSGSVSQRVTSSQTVSHGVNETIYNTTLKYGDVVGVNTTKYPYRVCSMAQGTDL IRFERNIVCTSMKPINEDLDEGIMVVYKRNIVAHTFKVRVYQKVLTFRRSYAYIHTTY LLGSNTEYVAPPMWEIHHINSHSQCYSSYSRVIAGTVFVAYHRDSYENKTMQLMPDDY SNTHSTRYVTVKDQWHSRGSTWLYRETCNLNCMVTITTARSKYPYHFFATSTGDVVDI SPFYNGTNRNASYFGENADKFFIFPNYTIVSDFGRPNSALETHRLVAFLERADSVISW DIQDEKNVTCQLTFWEASERTIRSEAEDSYHFSSAKMTATFLSKKQEVNMSDSALDCV …
83025	SNV	A	G	0.0090312	5	13	38.4615	0	17	0	AAR31620.1:p.Tyr589His	Yes	UL55	HHV5wtgp060	type 1 membrane protein; possible membrane fusogen; binds cell surface heparan sulphate; involved in cell entry; involved in cell-to-cell spread	envelope glycoprotein B	AAR31620.1	GI:39842076	MESRIWCLVVCVNLCIVCLGAAVSSSSTRGTSATHSHHSSHTTS AAHSRSGSVSQRVTSSQTVSHGVNETIYNTTLKYGDVVGVNTTKYPYRVCSMAQGTDL IRFERNIVCTSMKPINEDLDEGIMVVYKRNIVAHTFKVRVYQKVLTFRRSYAYIHTTY LLGSNTEYVAPPMWEIHHINSHSQCYSSYSRVIAGTVFVAYHRDSYENKTMQLMPDDY SNTHSTRYVTVKDQWHSRGSTWLYRETCNLNCMVTITTARSKYPYHFFATSTGDVVDI SPFYNGTNRNASYFGENADKFFIFPNYTIVSDFGRPNSALETHRLVAFLERADSVISW DIQDEKNVTCQLTFWEASERTIRSEAEDSYHFSSAKMTATFLSKKQEVNMSDSALDCV …
83041..83042	MNV	AT	GG	0.0090312	5	13	38.4615	0	17	0	AAR31620.1:p.Asn583Thr	Yes	UL55	HHV5wtgp060	type 1 membrane protein; possible membrane fusogen; binds cell surface heparan sulphate; involved in cell entry; involved in cell-to-cell spread	envelope glycoprotein B	AAR31620.1	GI:39842076	MESRIWCLVVCVNLCIVCLGAAVSSSSTRGTSATHSHHSSHTTS AAHSRSGSVSQRVTSSQTVSHGVNETIYNTTLKYGDVVGVNTTKYPYRVCSMAQGTDL IRFERNIVCTSMKPINEDLDEGIMVVYKRNIVAHTFKVRVYQKVLTFRRSYAYIHTTY LLGSNTEYVAPPMWEIHHINSHSQCYSSYSRVIAGTVFVAYHRDSYENKTMQLMPDDY SNTHSTRYVTVKDQWHSRGSTWLYRETCNLNCMVTITTARSKYPYHFFATSTGDVVDI SPFYNGTNRNASYFGENADKFFIFPNYTIVSDFGRPNSALETHRLVAFLERADSVISW DIQDEKNVTCQLTFWEASERTIRSEAEDSYHFSSAKMTATFLSKKQEVNMSDSALDCV …
83044	SNV	A	G	0.0090312	5	13	38.4615	0	17	0		No	UL55	HHV5wtgp060	type 1 membrane protein; possible membrane fusogen; binds cell surface heparan sulphate; involved in cell entry; involved in cell-to-cell spread	envelope glycoprotein B	AAR31620.1	GI:39842076	MESRIWCLVVCVNLCIVCLGAAVSSSSTRGTSATHSHHSSHTTS AAHSRSGSVSQRVTSSQTVSHGVNETIYNTTLKYGDVVGVNTTKYPYRVCSMAQGTDL IRFERNIVCTSMKPINEDLDEGIMVVYKRNIVAHTFKVRVYQKVLTFRRSYAYIHTTY LLGSNTEYVAPPMWEIHHINSHSQCYSSYSRVIAGTVFVAYHRDSYENKTMQLMPDDY SNTHSTRYVTVKDQWHSRGSTWLYRETCNLNCMVTITTARSKYPYHFFATSTGDVVDI SPFYNGTNRNASYFGENADKFFIFPNYTIVSDFGRPNSALETHRLVAFLERADSVISW DIQDEKNVTCQLTFWEASERTIRSEAEDSYHFSSAKMTATFLSKKQEVNMSDSALDCV …
83047	SNV	G	A	0.0090312	5	13	38.4615	0	17	0		No	UL55	HHV5wtgp060	type 1 membrane protein; possible membrane fusogen; binds cell surface heparan sulphate; involved in cell entry; involved in cell-to-cell spread	envelope glycoprotein B	AAR31620.1	GI:39842076	MESRIWCLVVCVNLCIVCLGAAVSSSSTRGTSATHSHHSSHTTS AAHSRSGSVSQRVTSSQTVSHGVNETIYNTTLKYGDVVGVNTTKYPYRVCSMAQGTDL IRFERNIVCTSMKPINEDLDEGIMVVYKRNIVAHTFKVRVYQKVLTFRRSYAYIHTTY LLGSNTEYVAPPMWEIHHINSHSQCYSSYSRVIAGTVFVAYHRDSYENKTMQLMPDDY SNTHSTRYVTVKDQWHSRGSTWLYRETCNLNCMVTITTARSKYPYHFFATSTGDVVDI SPFYNGTNRNASYFGENADKFFIFPNYTIVSDFGRPNSALETHRLVAFLERADSVISW DIQDEKNVTCQLTFWEASERTIRSEAEDSYHFSSAKMTATFLSKKQEVNMSDSALDCV …
83053	SNV	C	T	0.0090312	5	13	38.4615	0	17	0		No	UL55	HHV5wtgp060	type 1 membrane protein; possible membrane fusogen; binds cell surface heparan sulphate; involved in cell entry; involved in cell-to-cell spread	envelope glycoprotein B	AAR31620.1	GI:39842076	MESRIWCLVVCVNLCIVCLGAAVSSSSTRGTSATHSHHSSHTTS AAHSRSGSVSQRVTSSQTVSHGVNETIYNTTLKYGDVVGVNTTKYPYRVCSMAQGTDL IRFERNIVCTSMKPINEDLDEGIMVVYKRNIVAHTFKVRVYQKVLTFRRSYAYIHTTY LLGSNTEYVAPPMWEIHHINSHSQCYSSYSRVIAGTVFVAYHRDSYENKTMQLMPDDY SNTHSTRYVTVKDQWHSRGSTWLYRETCNLNCMVTITTARSKYPYHFFATSTGDVVDI SPFYNGTNRNASYFGENADKFFIFPNYTIVSDFGRPNSALETHRLVAFLERADSVISW DIQDEKNVTCQLTFWEASERTIRSEAEDSYHFSSAKMTATFLSKKQEVNMSDSALDCV …
83062	SNV	T	C	0.0090312	5	13	38.4615	0	17	0		No	UL55	HHV5wtgp060	type 1 membrane protein; possible membrane fusogen; binds cell surface heparan sulphate; involved in cell entry; involved in cell-to-cell spread	envelope glycoprotein B	AAR31620.1	GI:39842076	MESRIWCLVVCVNLCIVCLGAAVSSSSTRGTSATHSHHSSHTTS AAHSRSGSVSQRVTSSQTVSHGVNETIYNTTLKYGDVVGVNTTKYPYRVCSMAQGTDL IRFERNIVCTSMKPINEDLDEGIMVVYKRNIVAHTFKVRVYQKVLTFRRSYAYIHTTY LLGSNTEYVAPPMWEIHHINSHSQCYSSYSRVIAGTVFVAYHRDSYENKTMQLMPDDY SNTHSTRYVTVKDQWHSRGSTWLYRETCNLNCMVTITTARSKYPYHFFATSTGDVVDI SPFYNGTNRNASYFGENADKFFIFPNYTIVSDFGRPNSALETHRLVAFLERADSVISW DIQDEKNVTCQLTFWEASERTIRSEAEDSYHFSSAKMTATFLSKKQEVNMSDSALDCV …
83079	SNV	G	T	0.0090312	5	13	38.4615	0	17	0	AAR31620.1:p.Pro571Thr	Yes	UL55	HHV5wtgp060	type 1 membrane protein; possible membrane fusogen; binds cell surface heparan sulphate; involved in cell entry; involved in cell-to-cell spread	envelope glycoprotein B	AAR31620.1	GI:39842076	MESRIWCLVVCVNLCIVCLGAAVSSSSTRGTSATHSHHSSHTTS AAHSRSGSVSQRVTSSQTVSHGVNETIYNTTLKYGDVVGVNTTKYPYRVCSMAQGTDL IRFERNIVCTSMKPINEDLDEGIMVVYKRNIVAHTFKVRVYQKVLTFRRSYAYIHTTY LLGSNTEYVAPPMWEIHHINSHSQCYSSYSRVIAGTVFVAYHRDSYENKTMQLMPDDY SNTHSTRYVTVKDQWHSRGSTWLYRETCNLNCMVTITTARSKYPYHFFATSTGDVVDI SPFYNGTNRNASYFGENADKFFIFPNYTIVSDFGRPNSALETHRLVAFLERADSVISW DIQDEKNVTCQLTFWEASERTIRSEAEDSYHFSSAKMTATFLSKKQEVNMSDSALDCV …
83083	SNV	C	G	0.0090312	5	13	38.4615	0	17	0	AAR31620.1:p.Glu569Asp	Yes	UL55	HHV5wtgp060	type 1 membrane protein; possible membrane fusogen; binds cell surface heparan sulphate; involved in cell entry; involved in cell-to-cell spread	envelope glycoprotein B	AAR31620.1	GI:39842076	MESRIWCLVVCVNLCIVCLGAAVSSSSTRGTSATHSHHSSHTTS AAHSRSGSVSQRVTSSQTVSHGVNETIYNTTLKYGDVVGVNTTKYPYRVCSMAQGTDL IRFERNIVCTSMKPINEDLDEGIMVVYKRNIVAHTFKVRVYQKVLTFRRSYAYIHTTY LLGSNTEYVAPPMWEIHHINSHSQCYSSYSRVIAGTVFVAYHRDSYENKTMQLMPDDY SNTHSTRYVTVKDQWHSRGSTWLYRETCNLNCMVTITTARSKYPYHFFATSTGDVVDI SPFYNGTNRNASYFGENADKFFIFPNYTIVSDFGRPNSALETHRLVAFLERADSVISW DIQDEKNVTCQLTFWEASERTIRSEAEDSYHFSSAKMTATFLSKKQEVNMSDSALDCV …
83089	SNV	C	T	0.0090312	5	13	38.4615	0	17	0		No	UL55	HHV5wtgp060	type 1 membrane protein; possible membrane fusogen; binds cell surface heparan sulphate; involved in cell entry; involved in cell-to-cell spread	envelope glycoprotein B	AAR31620.1	GI:39842076	MESRIWCLVVCVNLCIVCLGAAVSSSSTRGTSATHSHHSSHTTS AAHSRSGSVSQRVTSSQTVSHGVNETIYNTTLKYGDVVGVNTTKYPYRVCSMAQGTDL IRFERNIVCTSMKPINEDLDEGIMVVYKRNIVAHTFKVRVYQKVLTFRRSYAYIHTTY LLGSNTEYVAPPMWEIHHINSHSQCYSSYSRVIAGTVFVAYHRDSYENKTMQLMPDDY SNTHSTRYVTVKDQWHSRGSTWLYRETCNLNCMVTITTARSKYPYHFFATSTGDVVDI SPFYNGTNRNASYFGENADKFFIFPNYTIVSDFGRPNSALETHRLVAFLERADSVISW DIQDEKNVTCQLTFWEASERTIRSEAEDSYHFSSAKMTATFLSKKQEVNMSDSALDCV …
83091..83093	MNV	CGT	TAG	0.0090312	5	13	38.4615	0	17	0	AAR31620.1:p.Asn566_Val567delinsThrMet	Yes	UL55	HHV5wtgp060	type 1 membrane protein; possible membrane fusogen; binds cell surface heparan sulphate; involved in cell entry; involved in cell-to-cell spread	envelope glycoprotein B	AAR31620.1	GI:39842076	MESRIWCLVVCVNLCIVCLGAAVSSSSTRGTSATHSHHSSHTTS AAHSRSGSVSQRVTSSQTVSHGVNETIYNTTLKYGDVVGVNTTKYPYRVCSMAQGTDL IRFERNIVCTSMKPINEDLDEGIMVVYKRNIVAHTFKVRVYQKVLTFRRSYAYIHTTY LLGSNTEYVAPPMWEIHHINSHSQCYSSYSRVIAGTVFVAYHRDSYENKTMQLMPDDY SNTHSTRYVTVKDQWHSRGSTWLYRETCNLNCMVTITTARSKYPYHFFATSTGDVVDI SPFYNGTNRNASYFGENADKFFIFPNYTIVSDFGRPNSALETHRLVAFLERADSVISW DIQDEKNVTCQLTFWEASERTIRSEAEDSYHFSSAKMTATFLSKKQEVNMSDSALDCV …
83137	SNV	G	A	0.0090312	5	13	38.4615	0	17	0		No	UL55	HHV5wtgp060	type 1 membrane protein; possible membrane fusogen; binds cell surface heparan sulphate; involved in cell entry; involved in cell-to-cell spread	envelope glycoprotein B	AAR31620.1	GI:39842076	MESRIWCLVVCVNLCIVCLGAAVSSSSTRGTSATHSHHSSHTTS AAHSRSGSVSQRVTSSQTVSHGVNETIYNTTLKYGDVVGVNTTKYPYRVCSMAQGTDL IRFERNIVCTSMKPINEDLDEGIMVVYKRNIVAHTFKVRVYQKVLTFRRSYAYIHTTY LLGSNTEYVAPPMWEIHHINSHSQCYSSYSRVIAGTVFVAYHRDSYENKTMQLMPDDY SNTHSTRYVTVKDQWHSRGSTWLYRETCNLNCMVTITTARSKYPYHFFATSTGDVVDI SPFYNGTNRNASYFGENADKFFIFPNYTIVSDFGRPNSALETHRLVAFLERADSVISW DIQDEKNVTCQLTFWEASERTIRSEAEDSYHFSSAKMTATFLSKKQEVNMSDSALDCV …
83161	SNV	A	G	0.0090312	5	13	38.4615	0	17	0		No	UL55	HHV5wtgp060	type 1 membrane protein; possible membrane fusogen; binds cell surface heparan sulphate; involved in cell entry; involved in cell-to-cell spread	envelope glycoprotein B	AAR31620.1	GI:39842076	MESRIWCLVVCVNLCIVCLGAAVSSSSTRGTSATHSHHSSHTTS AAHSRSGSVSQRVTSSQTVSHGVNETIYNTTLKYGDVVGVNTTKYPYRVCSMAQGTDL IRFERNIVCTSMKPINEDLDEGIMVVYKRNIVAHTFKVRVYQKVLTFRRSYAYIHTTY LLGSNTEYVAPPMWEIHHINSHSQCYSSYSRVIAGTVFVAYHRDSYENKTMQLMPDDY SNTHSTRYVTVKDQWHSRGSTWLYRETCNLNCMVTITTARSKYPYHFFATSTGDVVDI SPFYNGTNRNASYFGENADKFFIFPNYTIVSDFGRPNSALETHRLVAFLERADSVISW DIQDEKNVTCQLTFWEASERTIRSEAEDSYHFSSAKMTATFLSKKQEVNMSDSALDCV …
83182	SNV	C	T	0.0090312	5	13	38.4615	0	17	0		No	UL55	HHV5wtgp060	type 1 membrane protein; possible membrane fusogen; binds cell surface heparan sulphate; involved in cell entry; involved in cell-to-cell spread	envelope glycoprotein B	AAR31620.1	GI:39842076	MESRIWCLVVCVNLCIVCLGAAVSSSSTRGTSATHSHHSSHTTS AAHSRSGSVSQRVTSSQTVSHGVNETIYNTTLKYGDVVGVNTTKYPYRVCSMAQGTDL IRFERNIVCTSMKPINEDLDEGIMVVYKRNIVAHTFKVRVYQKVLTFRRSYAYIHTTY LLGSNTEYVAPPMWEIHHINSHSQCYSSYSRVIAGTVFVAYHRDSYENKTMQLMPDDY SNTHSTRYVTVKDQWHSRGSTWLYRETCNLNCMVTITTARSKYPYHFFATSTGDVVDI SPFYNGTNRNASYFGENADKFFIFPNYTIVSDFGRPNSALETHRLVAFLERADSVISW DIQDEKNVTCQLTFWEASERTIRSEAEDSYHFSSAKMTATFLSKKQEVNMSDSALDCV …
83200	SNV	C	T	0.0397373	5	13	38.4615	1	17	5.88235		No	UL55	HHV5wtgp060	type 1 membrane protein; possible membrane fusogen; binds cell surface heparan sulphate; involved in cell entry; involved in cell-to-cell spread	envelope glycoprotein B	AAR31620.1	GI:39842076	MESRIWCLVVCVNLCIVCLGAAVSSSSTRGTSATHSHHSSHTTS AAHSRSGSVSQRVTSSQTVSHGVNETIYNTTLKYGDVVGVNTTKYPYRVCSMAQGTDL IRFERNIVCTSMKPINEDLDEGIMVVYKRNIVAHTFKVRVYQKVLTFRRSYAYIHTTY LLGSNTEYVAPPMWEIHHINSHSQCYSSYSRVIAGTVFVAYHRDSYENKTMQLMPDDY SNTHSTRYVTVKDQWHSRGSTWLYRETCNLNCMVTITTARSKYPYHFFATSTGDVVDI SPFYNGTNRNASYFGENADKFFIFPNYTIVSDFGRPNSALETHRLVAFLERADSVISW DIQDEKNVTCQLTFWEASERTIRSEAEDSYHFSSAKMTATFLSKKQEVNMSDSALDCV …
83221	SNV	G	A	0.0090312	5	13	38.4615	0	17	0		No	UL55	HHV5wtgp060	type 1 membrane protein; possible membrane fusogen; binds cell surface heparan sulphate; involved in cell entry; involved in cell-to-cell spread	envelope glycoprotein B	AAR31620.1	GI:39842076	MESRIWCLVVCVNLCIVCLGAAVSSSSTRGTSATHSHHSSHTTS AAHSRSGSVSQRVTSSQTVSHGVNETIYNTTLKYGDVVGVNTTKYPYRVCSMAQGTDL IRFERNIVCTSMKPINEDLDEGIMVVYKRNIVAHTFKVRVYQKVLTFRRSYAYIHTTY LLGSNTEYVAPPMWEIHHINSHSQCYSSYSRVIAGTVFVAYHRDSYENKTMQLMPDDY SNTHSTRYVTVKDQWHSRGSTWLYRETCNLNCMVTITTARSKYPYHFFATSTGDVVDI SPFYNGTNRNASYFGENADKFFIFPNYTIVSDFGRPNSALETHRLVAFLERADSVISW DIQDEKNVTCQLTFWEASERTIRSEAEDSYHFSSAKMTATFLSKKQEVNMSDSALDCV …
83236	SNV	C	T	0.0260901	4	13	30.7692	0	17	0		No	UL55	HHV5wtgp060	type 1 membrane protein; possible membrane fusogen; binds cell surface heparan sulphate; involved in cell entry; involved in cell-to-cell spread	envelope glycoprotein B	AAR31620.1	GI:39842076	MESRIWCLVVCVNLCIVCLGAAVSSSSTRGTSATHSHHSSHTTS AAHSRSGSVSQRVTSSQTVSHGVNETIYNTTLKYGDVVGVNTTKYPYRVCSMAQGTDL IRFERNIVCTSMKPINEDLDEGIMVVYKRNIVAHTFKVRVYQKVLTFRRSYAYIHTTY LLGSNTEYVAPPMWEIHHINSHSQCYSSYSRVIAGTVFVAYHRDSYENKTMQLMPDDY SNTHSTRYVTVKDQWHSRGSTWLYRETCNLNCMVTITTARSKYPYHFFATSTGDVVDI SPFYNGTNRNASYFGENADKFFIFPNYTIVSDFGRPNSALETHRLVAFLERADSVISW DIQDEKNVTCQLTFWEASERTIRSEAEDSYHFSSAKMTATFLSKKQEVNMSDSALDCV …
83242	SNV	G	A	0.0260901	4	13	30.7692	0	17	0		No	UL55	HHV5wtgp060	type 1 membrane protein; possible membrane fusogen; binds cell surface heparan sulphate; involved in cell entry; involved in cell-to-cell spread	envelope glycoprotein B	AAR31620.1	GI:39842076	MESRIWCLVVCVNLCIVCLGAAVSSSSTRGTSATHSHHSSHTTS AAHSRSGSVSQRVTSSQTVSHGVNETIYNTTLKYGDVVGVNTTKYPYRVCSMAQGTDL IRFERNIVCTSMKPINEDLDEGIMVVYKRNIVAHTFKVRVYQKVLTFRRSYAYIHTTY LLGSNTEYVAPPMWEIHHINSHSQCYSSYSRVIAGTVFVAYHRDSYENKTMQLMPDDY SNTHSTRYVTVKDQWHSRGSTWLYRETCNLNCMVTITTARSKYPYHFFATSTGDVVDI SPFYNGTNRNASYFGENADKFFIFPNYTIVSDFGRPNSALETHRLVAFLERADSVISW DIQDEKNVTCQLTFWEASERTIRSEAEDSYHFSSAKMTATFLSKKQEVNMSDSALDCV …
83251	SNV	G	A	0.0260901	4	13	30.7692	0	17	0		No	UL55	HHV5wtgp060	type 1 membrane protein; possible membrane fusogen; binds cell surface heparan sulphate; involved in cell entry; involved in cell-to-cell spread	envelope glycoprotein B	AAR31620.1	GI:39842076	MESRIWCLVVCVNLCIVCLGAAVSSSSTRGTSATHSHHSSHTTS AAHSRSGSVSQRVTSSQTVSHGVNETIYNTTLKYGDVVGVNTTKYPYRVCSMAQGTDL IRFERNIVCTSMKPINEDLDEGIMVVYKRNIVAHTFKVRVYQKVLTFRRSYAYIHTTY LLGSNTEYVAPPMWEIHHINSHSQCYSSYSRVIAGTVFVAYHRDSYENKTMQLMPDDY SNTHSTRYVTVKDQWHSRGSTWLYRETCNLNCMVTITTARSKYPYHFFATSTGDVVDI SPFYNGTNRNASYFGENADKFFIFPNYTIVSDFGRPNSALETHRLVAFLERADSVISW DIQDEKNVTCQLTFWEASERTIRSEAEDSYHFSSAKMTATFLSKKQEVNMSDSALDCV …
83269	SNV	A	G	0.0260901	4	13	30.7692	0	17	0		No	UL55	HHV5wtgp060	type 1 membrane protein; possible membrane fusogen; binds cell surface heparan sulphate; involved in cell entry; involved in cell-to-cell spread	envelope glycoprotein B	AAR31620.1	GI:39842076	MESRIWCLVVCVNLCIVCLGAAVSSSSTRGTSATHSHHSSHTTS AAHSRSGSVSQRVTSSQTVSHGVNETIYNTTLKYGDVVGVNTTKYPYRVCSMAQGTDL IRFERNIVCTSMKPINEDLDEGIMVVYKRNIVAHTFKVRVYQKVLTFRRSYAYIHTTY LLGSNTEYVAPPMWEIHHINSHSQCYSSYSRVIAGTVFVAYHRDSYENKTMQLMPDDY SNTHSTRYVTVKDQWHSRGSTWLYRETCNLNCMVTITTARSKYPYHFFATSTGDVVDI SPFYNGTNRNASYFGENADKFFIFPNYTIVSDFGRPNSALETHRLVAFLERADSVISW DIQDEKNVTCQLTFWEASERTIRSEAEDSYHFSSAKMTATFLSKKQEVNMSDSALDCV …
83311..83313	MNV	ACC	GTT	0.0260901	4	13	30.7692	0	17	0	AAR31620.1:p.Gly493Asn	Yes	UL55	HHV5wtgp060	type 1 membrane protein; possible membrane fusogen; binds cell surface heparan sulphate; involved in cell entry; involved in cell-to-cell spread	envelope glycoprotein B	AAR31620.1	GI:39842076	MESRIWCLVVCVNLCIVCLGAAVSSSSTRGTSATHSHHSSHTTS AAHSRSGSVSQRVTSSQTVSHGVNETIYNTTLKYGDVVGVNTTKYPYRVCSMAQGTDL IRFERNIVCTSMKPINEDLDEGIMVVYKRNIVAHTFKVRVYQKVLTFRRSYAYIHTTY LLGSNTEYVAPPMWEIHHINSHSQCYSSYSRVIAGTVFVAYHRDSYENKTMQLMPDDY SNTHSTRYVTVKDQWHSRGSTWLYRETCNLNCMVTITTARSKYPYHFFATSTGDVVDI SPFYNGTNRNASYFGENADKFFIFPNYTIVSDFGRPNSALETHRLVAFLERADSVISW DIQDEKNVTCQLTFWEASERTIRSEAEDSYHFSSAKMTATFLSKKQEVNMSDSALDCV …
83332	SNV	G	A	0.0260901	4	13	30.7692	0	17	0		No	UL55	HHV5wtgp060	type 1 membrane protein; possible membrane fusogen; binds cell surface heparan sulphate; involved in cell entry; involved in cell-to-cell spread	envelope glycoprotein B	AAR31620.1	GI:39842076	MESRIWCLVVCVNLCIVCLGAAVSSSSTRGTSATHSHHSSHTTS AAHSRSGSVSQRVTSSQTVSHGVNETIYNTTLKYGDVVGVNTTKYPYRVCSMAQGTDL IRFERNIVCTSMKPINEDLDEGIMVVYKRNIVAHTFKVRVYQKVLTFRRSYAYIHTTY LLGSNTEYVAPPMWEIHHINSHSQCYSSYSRVIAGTVFVAYHRDSYENKTMQLMPDDY SNTHSTRYVTVKDQWHSRGSTWLYRETCNLNCMVTITTARSKYPYHFFATSTGDVVDI SPFYNGTNRNASYFGENADKFFIFPNYTIVSDFGRPNSALETHRLVAFLERADSVISW DIQDEKNVTCQLTFWEASERTIRSEAEDSYHFSSAKMTATFLSKKQEVNMSDSALDCV …
83446	SNV	G	T	0.0397373	5	13	38.4615	1	17	5.88235		No	UL55	HHV5wtgp060	type 1 membrane protein; possible membrane fusogen; binds cell surface heparan sulphate; involved in cell entry; involved in cell-to-cell spread	envelope glycoprotein B	AAR31620.1	GI:39842076	MESRIWCLVVCVNLCIVCLGAAVSSSSTRGTSATHSHHSSHTTS AAHSRSGSVSQRVTSSQTVSHGVNETIYNTTLKYGDVVGVNTTKYPYRVCSMAQGTDL IRFERNIVCTSMKPINEDLDEGIMVVYKRNIVAHTFKVRVYQKVLTFRRSYAYIHTTY LLGSNTEYVAPPMWEIHHINSHSQCYSSYSRVIAGTVFVAYHRDSYENKTMQLMPDDY SNTHSTRYVTVKDQWHSRGSTWLYRETCNLNCMVTITTARSKYPYHFFATSTGDVVDI SPFYNGTNRNASYFGENADKFFIFPNYTIVSDFGRPNSALETHRLVAFLERADSVISW DIQDEKNVTCQLTFWEASERTIRSEAEDSYHFSSAKMTATFLSKKQEVNMSDSALDCV …
83455	SNV	C	T	0.0260901	4	13	30.7692	0	17	0		No	UL55	HHV5wtgp060	type 1 membrane protein; possible membrane fusogen; binds cell surface heparan sulphate; involved in cell entry; involved in cell-to-cell spread	envelope glycoprotein B	AAR31620.1	GI:39842076	MESRIWCLVVCVNLCIVCLGAAVSSSSTRGTSATHSHHSSHTTS AAHSRSGSVSQRVTSSQTVSHGVNETIYNTTLKYGDVVGVNTTKYPYRVCSMAQGTDL IRFERNIVCTSMKPINEDLDEGIMVVYKRNIVAHTFKVRVYQKVLTFRRSYAYIHTTY LLGSNTEYVAPPMWEIHHINSHSQCYSSYSRVIAGTVFVAYHRDSYENKTMQLMPDDY SNTHSTRYVTVKDQWHSRGSTWLYRETCNLNCMVTITTARSKYPYHFFATSTGDVVDI SPFYNGTNRNASYFGENADKFFIFPNYTIVSDFGRPNSALETHRLVAFLERADSVISW DIQDEKNVTCQLTFWEASERTIRSEAEDSYHFSSAKMTATFLSKKQEVNMSDSALDCV …
83464	SNV	G	T	0.0260901	4	13	30.7692	0	17	0		No	UL55	HHV5wtgp060	type 1 membrane protein; possible membrane fusogen; binds cell surface heparan sulphate; involved in cell entry; involved in cell-to-cell spread	envelope glycoprotein B	AAR31620.1	GI:39842076	MESRIWCLVVCVNLCIVCLGAAVSSSSTRGTSATHSHHSSHTTS AAHSRSGSVSQRVTSSQTVSHGVNETIYNTTLKYGDVVGVNTTKYPYRVCSMAQGTDL IRFERNIVCTSMKPINEDLDEGIMVVYKRNIVAHTFKVRVYQKVLTFRRSYAYIHTTY LLGSNTEYVAPPMWEIHHINSHSQCYSSYSRVIAGTVFVAYHRDSYENKTMQLMPDDY SNTHSTRYVTVKDQWHSRGSTWLYRETCNLNCMVTITTARSKYPYHFFATSTGDVVDI SPFYNGTNRNASYFGENADKFFIFPNYTIVSDFGRPNSALETHRLVAFLERADSVISW DIQDEKNVTCQLTFWEASERTIRSEAEDSYHFSSAKMTATFLSKKQEVNMSDSALDCV …
83466	SNV	G	A	0.00157921	8	13	61.5385	1	17	5.88235	AAR31620.1:p.Leu442Phe	Yes	UL55	HHV5wtgp060	type 1 membrane protein; possible membrane fusogen; binds cell surface heparan sulphate; involved in cell entry; involved in cell-to-cell spread	envelope glycoprotein B	AAR31620.1	GI:39842076	MESRIWCLVVCVNLCIVCLGAAVSSSSTRGTSATHSHHSSHTTS AAHSRSGSVSQRVTSSQTVSHGVNETIYNTTLKYGDVVGVNTTKYPYRVCSMAQGTDL IRFERNIVCTSMKPINEDLDEGIMVVYKRNIVAHTFKVRVYQKVLTFRRSYAYIHTTY LLGSNTEYVAPPMWEIHHINSHSQCYSSYSRVIAGTVFVAYHRDSYENKTMQLMPDDY SNTHSTRYVTVKDQWHSRGSTWLYRETCNLNCMVTITTARSKYPYHFFATSTGDVVDI SPFYNGTNRNASYFGENADKFFIFPNYTIVSDFGRPNSALETHRLVAFLERADSVISW DIQDEKNVTCQLTFWEASERTIRSEAEDSYHFSSAKMTATFLSKKQEVNMSDSALDCV …
83482	SNV	T	C	0.0260901	4	13	30.7692	0	17	0		No	UL55	HHV5wtgp060	type 1 membrane protein; possible membrane fusogen; binds cell surface heparan sulphate; involved in cell entry; involved in cell-to-cell spread	envelope glycoprotein B	AAR31620.1	GI:39842076	MESRIWCLVVCVNLCIVCLGAAVSSSSTRGTSATHSHHSSHTTS AAHSRSGSVSQRVTSSQTVSHGVNETIYNTTLKYGDVVGVNTTKYPYRVCSMAQGTDL IRFERNIVCTSMKPINEDLDEGIMVVYKRNIVAHTFKVRVYQKVLTFRRSYAYIHTTY LLGSNTEYVAPPMWEIHHINSHSQCYSSYSRVIAGTVFVAYHRDSYENKTMQLMPDDY SNTHSTRYVTVKDQWHSRGSTWLYRETCNLNCMVTITTARSKYPYHFFATSTGDVVDI SPFYNGTNRNASYFGENADKFFIFPNYTIVSDFGRPNSALETHRLVAFLERADSVISW DIQDEKNVTCQLTFWEASERTIRSEAEDSYHFSSAKMTATFLSKKQEVNMSDSALDCV …
83527	SNV	A	G	0.00353648	11	13	84.6154	5	17	29.4118		No	UL55	HHV5wtgp060	type 1 membrane protein; possible membrane fusogen; binds cell surface heparan sulphate; involved in cell entry; involved in cell-to-cell spread	envelope glycoprotein B	AAR31620.1	GI:39842076	MESRIWCLVVCVNLCIVCLGAAVSSSSTRGTSATHSHHSSHTTS AAHSRSGSVSQRVTSSQTVSHGVNETIYNTTLKYGDVVGVNTTKYPYRVCSMAQGTDL IRFERNIVCTSMKPINEDLDEGIMVVYKRNIVAHTFKVRVYQKVLTFRRSYAYIHTTY LLGSNTEYVAPPMWEIHHINSHSQCYSSYSRVIAGTVFVAYHRDSYENKTMQLMPDDY SNTHSTRYVTVKDQWHSRGSTWLYRETCNLNCMVTITTARSKYPYHFFATSTGDVVDI SPFYNGTNRNASYFGENADKFFIFPNYTIVSDFGRPNSALETHRLVAFLERADSVISW DIQDEKNVTCQLTFWEASERTIRSEAEDSYHFSSAKMTATFLSKKQEVNMSDSALDCV …
83599	SNV	T	C	0.0397373	5	13	38.4615	1	17	5.88235	AAR31620.1:p.Ile397Met	Yes	UL55	HHV5wtgp060	type 1 membrane protein; possible membrane fusogen; binds cell surface heparan sulphate; involved in cell entry; involved in cell-to-cell spread	envelope glycoprotein B	AAR31620.1	GI:39842076	MESRIWCLVVCVNLCIVCLGAAVSSSSTRGTSATHSHHSSHTTS AAHSRSGSVSQRVTSSQTVSHGVNETIYNTTLKYGDVVGVNTTKYPYRVCSMAQGTDL IRFERNIVCTSMKPINEDLDEGIMVVYKRNIVAHTFKVRVYQKVLTFRRSYAYIHTTY LLGSNTEYVAPPMWEIHHINSHSQCYSSYSRVIAGTVFVAYHRDSYENKTMQLMPDDY SNTHSTRYVTVKDQWHSRGSTWLYRETCNLNCMVTITTARSKYPYHFFATSTGDVVDI SPFYNGTNRNASYFGENADKFFIFPNYTIVSDFGRPNSALETHRLVAFLERADSVISW DIQDEKNVTCQLTFWEASERTIRSEAEDSYHFSSAKMTATFLSKKQEVNMSDSALDCV …
83695	SNV	G	A	0.0397373	5	13	38.4615	1	17	5.88235		No	UL55	HHV5wtgp060	type 1 membrane protein; possible membrane fusogen; binds cell surface heparan sulphate; involved in cell entry; involved in cell-to-cell spread	envelope glycoprotein B	AAR31620.1	GI:39842076	MESRIWCLVVCVNLCIVCLGAAVSSSSTRGTSATHSHHSSHTTS AAHSRSGSVSQRVTSSQTVSHGVNETIYNTTLKYGDVVGVNTTKYPYRVCSMAQGTDL IRFERNIVCTSMKPINEDLDEGIMVVYKRNIVAHTFKVRVYQKVLTFRRSYAYIHTTY LLGSNTEYVAPPMWEIHHINSHSQCYSSYSRVIAGTVFVAYHRDSYENKTMQLMPDDY SNTHSTRYVTVKDQWHSRGSTWLYRETCNLNCMVTITTARSKYPYHFFATSTGDVVDI SPFYNGTNRNASYFGENADKFFIFPNYTIVSDFGRPNSALETHRLVAFLERADSVISW DIQDEKNVTCQLTFWEASERTIRSEAEDSYHFSSAKMTATFLSKKQEVNMSDSALDCV …
83709	SNV	C	T	0.0397373	5	13	38.4615	1	17	5.88235	AAR31620.1:p.Glu361Lys	Yes	UL55	HHV5wtgp060	type 1 membrane protein; possible membrane fusogen; binds cell surface heparan sulphate; involved in cell entry; involved in cell-to-cell spread	envelope glycoprotein B	AAR31620.1	GI:39842076	MESRIWCLVVCVNLCIVCLGAAVSSSSTRGTSATHSHHSSHTTS AAHSRSGSVSQRVTSSQTVSHGVNETIYNTTLKYGDVVGVNTTKYPYRVCSMAQGTDL IRFERNIVCTSMKPINEDLDEGIMVVYKRNIVAHTFKVRVYQKVLTFRRSYAYIHTTY LLGSNTEYVAPPMWEIHHINSHSQCYSSYSRVIAGTVFVAYHRDSYENKTMQLMPDDY SNTHSTRYVTVKDQWHSRGSTWLYRETCNLNCMVTITTARSKYPYHFFATSTGDVVDI SPFYNGTNRNASYFGENADKFFIFPNYTIVSDFGRPNSALETHRLVAFLERADSVISW DIQDEKNVTCQLTFWEASERTIRSEAEDSYHFSSAKMTATFLSKKQEVNMSDSALDCV …
83716	SNV	G	A	0.0397373	5	13	38.4615	1	17	5.88235		No	UL55	HHV5wtgp060	type 1 membrane protein; possible membrane fusogen; binds cell surface heparan sulphate; involved in cell entry; involved in cell-to-cell spread	envelope glycoprotein B	AAR31620.1	GI:39842076	MESRIWCLVVCVNLCIVCLGAAVSSSSTRGTSATHSHHSSHTTS AAHSRSGSVSQRVTSSQTVSHGVNETIYNTTLKYGDVVGVNTTKYPYRVCSMAQGTDL IRFERNIVCTSMKPINEDLDEGIMVVYKRNIVAHTFKVRVYQKVLTFRRSYAYIHTTY LLGSNTEYVAPPMWEIHHINSHSQCYSSYSRVIAGTVFVAYHRDSYENKTMQLMPDDY SNTHSTRYVTVKDQWHSRGSTWLYRETCNLNCMVTITTARSKYPYHFFATSTGDVVDI SPFYNGTNRNASYFGENADKFFIFPNYTIVSDFGRPNSALETHRLVAFLERADSVISW DIQDEKNVTCQLTFWEASERTIRSEAEDSYHFSSAKMTATFLSKKQEVNMSDSALDCV …
83719	SNV	A	G	0.0397373	5	13	38.4615	1	17	5.88235		No	UL55	HHV5wtgp060	type 1 membrane protein; possible membrane fusogen; binds cell surface heparan sulphate; involved in cell entry; involved in cell-to-cell spread	envelope glycoprotein B	AAR31620.1	GI:39842076	MESRIWCLVVCVNLCIVCLGAAVSSSSTRGTSATHSHHSSHTTS AAHSRSGSVSQRVTSSQTVSHGVNETIYNTTLKYGDVVGVNTTKYPYRVCSMAQGTDL IRFERNIVCTSMKPINEDLDEGIMVVYKRNIVAHTFKVRVYQKVLTFRRSYAYIHTTY LLGSNTEYVAPPMWEIHHINSHSQCYSSYSRVIAGTVFVAYHRDSYENKTMQLMPDDY SNTHSTRYVTVKDQWHSRGSTWLYRETCNLNCMVTITTARSKYPYHFFATSTGDVVDI SPFYNGTNRNASYFGENADKFFIFPNYTIVSDFGRPNSALETHRLVAFLERADSVISW DIQDEKNVTCQLTFWEASERTIRSEAEDSYHFSSAKMTATFLSKKQEVNMSDSALDCV …
83722	SNV	A	G	0.00623974	8	13	61.5385	2	17	11.7647		No	UL55	HHV5wtgp060	type 1 membrane protein; possible membrane fusogen; binds cell surface heparan sulphate; involved in cell entry; involved in cell-to-cell spread	envelope glycoprotein B	AAR31620.1	GI:39842076	MESRIWCLVVCVNLCIVCLGAAVSSSSTRGTSATHSHHSSHTTS AAHSRSGSVSQRVTSSQTVSHGVNETIYNTTLKYGDVVGVNTTKYPYRVCSMAQGTDL IRFERNIVCTSMKPINEDLDEGIMVVYKRNIVAHTFKVRVYQKVLTFRRSYAYIHTTY LLGSNTEYVAPPMWEIHHINSHSQCYSSYSRVIAGTVFVAYHRDSYENKTMQLMPDDY SNTHSTRYVTVKDQWHSRGSTWLYRETCNLNCMVTITTARSKYPYHFFATSTGDVVDI SPFYNGTNRNASYFGENADKFFIFPNYTIVSDFGRPNSALETHRLVAFLERADSVISW DIQDEKNVTCQLTFWEASERTIRSEAEDSYHFSSAKMTATFLSKKQEVNMSDSALDCV …
83746	SNV	G	A	0.0151724	6	13	46.1538	1	17	5.88235		No	UL55	HHV5wtgp060	type 1 membrane protein; possible membrane fusogen; binds cell surface heparan sulphate; involved in cell entry; involved in cell-to-cell spread	envelope glycoprotein B	AAR31620.1	GI:39842076	MESRIWCLVVCVNLCIVCLGAAVSSSSTRGTSATHSHHSSHTTS AAHSRSGSVSQRVTSSQTVSHGVNETIYNTTLKYGDVVGVNTTKYPYRVCSMAQGTDL IRFERNIVCTSMKPINEDLDEGIMVVYKRNIVAHTFKVRVYQKVLTFRRSYAYIHTTY LLGSNTEYVAPPMWEIHHINSHSQCYSSYSRVIAGTVFVAYHRDSYENKTMQLMPDDY SNTHSTRYVTVKDQWHSRGSTWLYRETCNLNCMVTITTARSKYPYHFFATSTGDVVDI SPFYNGTNRNASYFGENADKFFIFPNYTIVSDFGRPNSALETHRLVAFLERADSVISW DIQDEKNVTCQLTFWEASERTIRSEAEDSYHFSSAKMTATFLSKKQEVNMSDSALDCV …
83791	SNV	G	A	0.00623974	8	13	61.5385	2	17	11.7647		No	UL55	HHV5wtgp060	type 1 membrane protein; possible membrane fusogen; binds cell surface heparan sulphate; involved in cell entry; involved in cell-to-cell spread	envelope glycoprotein B	AAR31620.1	GI:39842076	MESRIWCLVVCVNLCIVCLGAAVSSSSTRGTSATHSHHSSHTTS AAHSRSGSVSQRVTSSQTVSHGVNETIYNTTLKYGDVVGVNTTKYPYRVCSMAQGTDL IRFERNIVCTSMKPINEDLDEGIMVVYKRNIVAHTFKVRVYQKVLTFRRSYAYIHTTY LLGSNTEYVAPPMWEIHHINSHSQCYSSYSRVIAGTVFVAYHRDSYENKTMQLMPDDY SNTHSTRYVTVKDQWHSRGSTWLYRETCNLNCMVTITTARSKYPYHFFATSTGDVVDI SPFYNGTNRNASYFGENADKFFIFPNYTIVSDFGRPNSALETHRLVAFLERADSVISW DIQDEKNVTCQLTFWEASERTIRSEAEDSYHFSSAKMTATFLSKKQEVNMSDSALDCV …
83803	SNV	G	A	0.0397373	5	13	38.4615	1	17	5.88235		No	UL55	HHV5wtgp060	type 1 membrane protein; possible membrane fusogen; binds cell surface heparan sulphate; involved in cell entry; involved in cell-to-cell spread	envelope glycoprotein B	AAR31620.1	GI:39842076	MESRIWCLVVCVNLCIVCLGAAVSSSSTRGTSATHSHHSSHTTS AAHSRSGSVSQRVTSSQTVSHGVNETIYNTTLKYGDVVGVNTTKYPYRVCSMAQGTDL IRFERNIVCTSMKPINEDLDEGIMVVYKRNIVAHTFKVRVYQKVLTFRRSYAYIHTTY LLGSNTEYVAPPMWEIHHINSHSQCYSSYSRVIAGTVFVAYHRDSYENKTMQLMPDDY SNTHSTRYVTVKDQWHSRGSTWLYRETCNLNCMVTITTARSKYPYHFFATSTGDVVDI SPFYNGTNRNASYFGENADKFFIFPNYTIVSDFGRPNSALETHRLVAFLERADSVISW DIQDEKNVTCQLTFWEASERTIRSEAEDSYHFSSAKMTATFLSKKQEVNMSDSALDCV …
83806	SNV	C	G	0.00623974	8	13	61.5385	2	17	11.7647		No	UL55	HHV5wtgp060	type 1 membrane protein; possible membrane fusogen; binds cell surface heparan sulphate; involved in cell entry; involved in cell-to-cell spread	envelope glycoprotein B	AAR31620.1	GI:39842076	MESRIWCLVVCVNLCIVCLGAAVSSSSTRGTSATHSHHSSHTTS AAHSRSGSVSQRVTSSQTVSHGVNETIYNTTLKYGDVVGVNTTKYPYRVCSMAQGTDL IRFERNIVCTSMKPINEDLDEGIMVVYKRNIVAHTFKVRVYQKVLTFRRSYAYIHTTY LLGSNTEYVAPPMWEIHHINSHSQCYSSYSRVIAGTVFVAYHRDSYENKTMQLMPDDY SNTHSTRYVTVKDQWHSRGSTWLYRETCNLNCMVTITTARSKYPYHFFATSTGDVVDI SPFYNGTNRNASYFGENADKFFIFPNYTIVSDFGRPNSALETHRLVAFLERADSVISW DIQDEKNVTCQLTFWEASERTIRSEAEDSYHFSSAKMTATFLSKKQEVNMSDSALDCV …
83815	SNV	A	G	0.00157921	8	13	61.5385	1	17	5.88235		No	UL55	HHV5wtgp060	type 1 membrane protein; possible membrane fusogen; binds cell surface heparan sulphate; involved in cell entry; involved in cell-to-cell spread	envelope glycoprotein B	AAR31620.1	GI:39842076	MESRIWCLVVCVNLCIVCLGAAVSSSSTRGTSATHSHHSSHTTS AAHSRSGSVSQRVTSSQTVSHGVNETIYNTTLKYGDVVGVNTTKYPYRVCSMAQGTDL IRFERNIVCTSMKPINEDLDEGIMVVYKRNIVAHTFKVRVYQKVLTFRRSYAYIHTTY LLGSNTEYVAPPMWEIHHINSHSQCYSSYSRVIAGTVFVAYHRDSYENKTMQLMPDDY SNTHSTRYVTVKDQWHSRGSTWLYRETCNLNCMVTITTARSKYPYHFFATSTGDVVDI SPFYNGTNRNASYFGENADKFFIFPNYTIVSDFGRPNSALETHRLVAFLERADSVISW DIQDEKNVTCQLTFWEASERTIRSEAEDSYHFSSAKMTATFLSKKQEVNMSDSALDCV …
83839	SNV	C	T	0.00623974	8	13	61.5385	2	17	11.7647		No	UL55	HHV5wtgp060	type 1 membrane protein; possible membrane fusogen; binds cell surface heparan sulphate; involved in cell entry; involved in cell-to-cell spread	envelope glycoprotein B	AAR31620.1	GI:39842076	MESRIWCLVVCVNLCIVCLGAAVSSSSTRGTSATHSHHSSHTTS AAHSRSGSVSQRVTSSQTVSHGVNETIYNTTLKYGDVVGVNTTKYPYRVCSMAQGTDL IRFERNIVCTSMKPINEDLDEGIMVVYKRNIVAHTFKVRVYQKVLTFRRSYAYIHTTY LLGSNTEYVAPPMWEIHHINSHSQCYSSYSRVIAGTVFVAYHRDSYENKTMQLMPDDY SNTHSTRYVTVKDQWHSRGSTWLYRETCNLNCMVTITTARSKYPYHFFATSTGDVVDI SPFYNGTNRNASYFGENADKFFIFPNYTIVSDFGRPNSALETHRLVAFLERADSVISW DIQDEKNVTCQLTFWEASERTIRSEAEDSYHFSSAKMTATFLSKKQEVNMSDSALDCV …
83843..83844	MNV	AA	TG	0.0397373	5	13	38.4615	1	17	5.88235	AAR31620.1:p.Leu316Gln	Yes	UL55	HHV5wtgp060	type 1 membrane protein; possible membrane fusogen; binds cell surface heparan sulphate; involved in cell entry; involved in cell-to-cell spread	envelope glycoprotein B	AAR31620.1	GI:39842076	MESRIWCLVVCVNLCIVCLGAAVSSSSTRGTSATHSHHSSHTTS AAHSRSGSVSQRVTSSQTVSHGVNETIYNTTLKYGDVVGVNTTKYPYRVCSMAQGTDL IRFERNIVCTSMKPINEDLDEGIMVVYKRNIVAHTFKVRVYQKVLTFRRSYAYIHTTY LLGSNTEYVAPPMWEIHHINSHSQCYSSYSRVIAGTVFVAYHRDSYENKTMQLMPDDY SNTHSTRYVTVKDQWHSRGSTWLYRETCNLNCMVTITTARSKYPYHFFATSTGDVVDI SPFYNGTNRNASYFGENADKFFIFPNYTIVSDFGRPNSALETHRLVAFLERADSVISW DIQDEKNVTCQLTFWEASERTIRSEAEDSYHFSSAKMTATFLSKKQEVNMSDSALDCV …
83850..83851	MNV	AA	CG	0.00623974	8	13	61.5385	2	17	11.7647	AAR31620.1:p.Ser314Ala	Yes	UL55	HHV5wtgp060	type 1 membrane protein; possible membrane fusogen; binds cell surface heparan sulphate; involved in cell entry; involved in cell-to-cell spread	envelope glycoprotein B	AAR31620.1	GI:39842076	MESRIWCLVVCVNLCIVCLGAAVSSSSTRGTSATHSHHSSHTTS AAHSRSGSVSQRVTSSQTVSHGVNETIYNTTLKYGDVVGVNTTKYPYRVCSMAQGTDL IRFERNIVCTSMKPINEDLDEGIMVVYKRNIVAHTFKVRVYQKVLTFRRSYAYIHTTY LLGSNTEYVAPPMWEIHHINSHSQCYSSYSRVIAGTVFVAYHRDSYENKTMQLMPDDY SNTHSTRYVTVKDQWHSRGSTWLYRETCNLNCMVTITTARSKYPYHFFATSTGDVVDI SPFYNGTNRNASYFGENADKFFIFPNYTIVSDFGRPNSALETHRLVAFLERADSVISW DIQDEKNVTCQLTFWEASERTIRSEAEDSYHFSSAKMTATFLSKKQEVNMSDSALDCV …
83854	SNV	C	G	0.00623974	8	13	61.5385	2	17	11.7647		No	UL55	HHV5wtgp060	type 1 membrane protein; possible membrane fusogen; binds cell surface heparan sulphate; involved in cell entry; involved in cell-to-cell spread	envelope glycoprotein B	AAR31620.1	GI:39842076	MESRIWCLVVCVNLCIVCLGAAVSSSSTRGTSATHSHHSSHTTS AAHSRSGSVSQRVTSSQTVSHGVNETIYNTTLKYGDVVGVNTTKYPYRVCSMAQGTDL IRFERNIVCTSMKPINEDLDEGIMVVYKRNIVAHTFKVRVYQKVLTFRRSYAYIHTTY LLGSNTEYVAPPMWEIHHINSHSQCYSSYSRVIAGTVFVAYHRDSYENKTMQLMPDDY SNTHSTRYVTVKDQWHSRGSTWLYRETCNLNCMVTITTARSKYPYHFFATSTGDVVDI SPFYNGTNRNASYFGENADKFFIFPNYTIVSDFGRPNSALETHRLVAFLERADSVISW DIQDEKNVTCQLTFWEASERTIRSEAEDSYHFSSAKMTATFLSKKQEVNMSDSALDCV …
83866	SNV	G	A	0.0397373	5	13	38.4615	1	17	5.88235		No	UL55	HHV5wtgp060	type 1 membrane protein; possible membrane fusogen; binds cell surface heparan sulphate; involved in cell entry; involved in cell-to-cell spread	envelope glycoprotein B	AAR31620.1	GI:39842076	MESRIWCLVVCVNLCIVCLGAAVSSSSTRGTSATHSHHSSHTTS AAHSRSGSVSQRVTSSQTVSHGVNETIYNTTLKYGDVVGVNTTKYPYRVCSMAQGTDL IRFERNIVCTSMKPINEDLDEGIMVVYKRNIVAHTFKVRVYQKVLTFRRSYAYIHTTY LLGSNTEYVAPPMWEIHHINSHSQCYSSYSRVIAGTVFVAYHRDSYENKTMQLMPDDY SNTHSTRYVTVKDQWHSRGSTWLYRETCNLNCMVTITTARSKYPYHFFATSTGDVVDI SPFYNGTNRNASYFGENADKFFIFPNYTIVSDFGRPNSALETHRLVAFLERADSVISW DIQDEKNVTCQLTFWEASERTIRSEAEDSYHFSSAKMTATFLSKKQEVNMSDSALDCV …
83872	SNV	G	A	0.00623974	8	13	61.5385	2	17	11.7647		No	UL55	HHV5wtgp060	type 1 membrane protein; possible membrane fusogen; binds cell surface heparan sulphate; involved in cell entry; involved in cell-to-cell spread	envelope glycoprotein B	AAR31620.1	GI:39842076	MESRIWCLVVCVNLCIVCLGAAVSSSSTRGTSATHSHHSSHTTS AAHSRSGSVSQRVTSSQTVSHGVNETIYNTTLKYGDVVGVNTTKYPYRVCSMAQGTDL IRFERNIVCTSMKPINEDLDEGIMVVYKRNIVAHTFKVRVYQKVLTFRRSYAYIHTTY LLGSNTEYVAPPMWEIHHINSHSQCYSSYSRVIAGTVFVAYHRDSYENKTMQLMPDDY SNTHSTRYVTVKDQWHSRGSTWLYRETCNLNCMVTITTARSKYPYHFFATSTGDVVDI SPFYNGTNRNASYFGENADKFFIFPNYTIVSDFGRPNSALETHRLVAFLERADSVISW DIQDEKNVTCQLTFWEASERTIRSEAEDSYHFSSAKMTATFLSKKQEVNMSDSALDCV …
83878	SNV	A	G	0.00623974	8	13	61.5385	2	17	11.7647		No	UL55	HHV5wtgp060	type 1 membrane protein; possible membrane fusogen; binds cell surface heparan sulphate; involved in cell entry; involved in cell-to-cell spread	envelope glycoprotein B	AAR31620.1	GI:39842076	MESRIWCLVVCVNLCIVCLGAAVSSSSTRGTSATHSHHSSHTTS AAHSRSGSVSQRVTSSQTVSHGVNETIYNTTLKYGDVVGVNTTKYPYRVCSMAQGTDL IRFERNIVCTSMKPINEDLDEGIMVVYKRNIVAHTFKVRVYQKVLTFRRSYAYIHTTY LLGSNTEYVAPPMWEIHHINSHSQCYSSYSRVIAGTVFVAYHRDSYENKTMQLMPDDY SNTHSTRYVTVKDQWHSRGSTWLYRETCNLNCMVTITTARSKYPYHFFATSTGDVVDI SPFYNGTNRNASYFGENADKFFIFPNYTIVSDFGRPNSALETHRLVAFLERADSVISW DIQDEKNVTCQLTFWEASERTIRSEAEDSYHFSSAKMTATFLSKKQEVNMSDSALDCV …
83911	SNV	G	A	0.0397373	5	13	38.4615	1	17	5.88235		No	UL55	HHV5wtgp060	type 1 membrane protein; possible membrane fusogen; binds cell surface heparan sulphate; involved in cell entry; involved in cell-to-cell spread	envelope glycoprotein B	AAR31620.1	GI:39842076	MESRIWCLVVCVNLCIVCLGAAVSSSSTRGTSATHSHHSSHTTS AAHSRSGSVSQRVTSSQTVSHGVNETIYNTTLKYGDVVGVNTTKYPYRVCSMAQGTDL IRFERNIVCTSMKPINEDLDEGIMVVYKRNIVAHTFKVRVYQKVLTFRRSYAYIHTTY LLGSNTEYVAPPMWEIHHINSHSQCYSSYSRVIAGTVFVAYHRDSYENKTMQLMPDDY SNTHSTRYVTVKDQWHSRGSTWLYRETCNLNCMVTITTARSKYPYHFFATSTGDVVDI SPFYNGTNRNASYFGENADKFFIFPNYTIVSDFGRPNSALETHRLVAFLERADSVISW DIQDEKNVTCQLTFWEASERTIRSEAEDSYHFSSAKMTATFLSKKQEVNMSDSALDCV …
83917	SNV	T	C	0.0397373	5	13	38.4615	1	17	5.88235		No	UL55	HHV5wtgp060	type 1 membrane protein; possible membrane fusogen; binds cell surface heparan sulphate; involved in cell entry; involved in cell-to-cell spread	envelope glycoprotein B	AAR31620.1	GI:39842076	MESRIWCLVVCVNLCIVCLGAAVSSSSTRGTSATHSHHSSHTTS AAHSRSGSVSQRVTSSQTVSHGVNETIYNTTLKYGDVVGVNTTKYPYRVCSMAQGTDL IRFERNIVCTSMKPINEDLDEGIMVVYKRNIVAHTFKVRVYQKVLTFRRSYAYIHTTY LLGSNTEYVAPPMWEIHHINSHSQCYSSYSRVIAGTVFVAYHRDSYENKTMQLMPDDY SNTHSTRYVTVKDQWHSRGSTWLYRETCNLNCMVTITTARSKYPYHFFATSTGDVVDI SPFYNGTNRNASYFGENADKFFIFPNYTIVSDFGRPNSALETHRLVAFLERADSVISW DIQDEKNVTCQLTFWEASERTIRSEAEDSYHFSSAKMTATFLSKKQEVNMSDSALDCV …
83956	SNV	A	G	0.0397373	5	13	38.4615	1	17	5.88235		No	UL55	HHV5wtgp060	type 1 membrane protein; possible membrane fusogen; binds cell surface heparan sulphate; involved in cell entry; involved in cell-to-cell spread	envelope glycoprotein B	AAR31620.1	GI:39842076	MESRIWCLVVCVNLCIVCLGAAVSSSSTRGTSATHSHHSSHTTS AAHSRSGSVSQRVTSSQTVSHGVNETIYNTTLKYGDVVGVNTTKYPYRVCSMAQGTDL IRFERNIVCTSMKPINEDLDEGIMVVYKRNIVAHTFKVRVYQKVLTFRRSYAYIHTTY LLGSNTEYVAPPMWEIHHINSHSQCYSSYSRVIAGTVFVAYHRDSYENKTMQLMPDDY SNTHSTRYVTVKDQWHSRGSTWLYRETCNLNCMVTITTARSKYPYHFFATSTGDVVDI SPFYNGTNRNASYFGENADKFFIFPNYTIVSDFGRPNSALETHRLVAFLERADSVISW DIQDEKNVTCQLTFWEASERTIRSEAEDSYHFSSAKMTATFLSKKQEVNMSDSALDCV …
83995	SNV	A	G	0.0397373	5	13	38.4615	1	17	5.88235		No	UL55	HHV5wtgp060	type 1 membrane protein; possible membrane fusogen; binds cell surface heparan sulphate; involved in cell entry; involved in cell-to-cell spread	envelope glycoprotein B	AAR31620.1	GI:39842076	MESRIWCLVVCVNLCIVCLGAAVSSSSTRGTSATHSHHSSHTTS AAHSRSGSVSQRVTSSQTVSHGVNETIYNTTLKYGDVVGVNTTKYPYRVCSMAQGTDL IRFERNIVCTSMKPINEDLDEGIMVVYKRNIVAHTFKVRVYQKVLTFRRSYAYIHTTY LLGSNTEYVAPPMWEIHHINSHSQCYSSYSRVIAGTVFVAYHRDSYENKTMQLMPDDY SNTHSTRYVTVKDQWHSRGSTWLYRETCNLNCMVTITTARSKYPYHFFATSTGDVVDI SPFYNGTNRNASYFGENADKFFIFPNYTIVSDFGRPNSALETHRLVAFLERADSVISW DIQDEKNVTCQLTFWEASERTIRSEAEDSYHFSSAKMTATFLSKKQEVNMSDSALDCV …
84022	SNV	A	G	0.0397373	5	13	38.4615	1	17	5.88235		No	UL55	HHV5wtgp060	type 1 membrane protein; possible membrane fusogen; binds cell surface heparan sulphate; involved in cell entry; involved in cell-to-cell spread	envelope glycoprotein B	AAR31620.1	GI:39842076	MESRIWCLVVCVNLCIVCLGAAVSSSSTRGTSATHSHHSSHTTS AAHSRSGSVSQRVTSSQTVSHGVNETIYNTTLKYGDVVGVNTTKYPYRVCSMAQGTDL IRFERNIVCTSMKPINEDLDEGIMVVYKRNIVAHTFKVRVYQKVLTFRRSYAYIHTTY LLGSNTEYVAPPMWEIHHINSHSQCYSSYSRVIAGTVFVAYHRDSYENKTMQLMPDDY SNTHSTRYVTVKDQWHSRGSTWLYRETCNLNCMVTITTARSKYPYHFFATSTGDVVDI SPFYNGTNRNASYFGENADKFFIFPNYTIVSDFGRPNSALETHRLVAFLERADSVISW DIQDEKNVTCQLTFWEASERTIRSEAEDSYHFSSAKMTATFLSKKQEVNMSDSALDCV …
84024..84025	MNV	TA	CG	0.0397373	5	13	38.4615	1	17	5.88235	AAR31620.1:p.Thr256Ala	Yes	UL55	HHV5wtgp060	type 1 membrane protein; possible membrane fusogen; binds cell surface heparan sulphate; involved in cell entry; involved in cell-to-cell spread	envelope glycoprotein B	AAR31620.1	GI:39842076	MESRIWCLVVCVNLCIVCLGAAVSSSSTRGTSATHSHHSSHTTS AAHSRSGSVSQRVTSSQTVSHGVNETIYNTTLKYGDVVGVNTTKYPYRVCSMAQGTDL IRFERNIVCTSMKPINEDLDEGIMVVYKRNIVAHTFKVRVYQKVLTFRRSYAYIHTTY LLGSNTEYVAPPMWEIHHINSHSQCYSSYSRVIAGTVFVAYHRDSYENKTMQLMPDDY SNTHSTRYVTVKDQWHSRGSTWLYRETCNLNCMVTITTARSKYPYHFFATSTGDVVDI SPFYNGTNRNASYFGENADKFFIFPNYTIVSDFGRPNSALETHRLVAFLERADSVISW DIQDEKNVTCQLTFWEASERTIRSEAEDSYHFSSAKMTATFLSKKQEVNMSDSALDCV …
84028	SNV	G	C	0.0397373	5	13	38.4615	1	17	5.88235	AAR31620.1:p.Ile254Met	Yes	UL55	HHV5wtgp060	type 1 membrane protein; possible membrane fusogen; binds cell surface heparan sulphate; involved in cell entry; involved in cell-to-cell spread	envelope glycoprotein B	AAR31620.1	GI:39842076	MESRIWCLVVCVNLCIVCLGAAVSSSSTRGTSATHSHHSSHTTS AAHSRSGSVSQRVTSSQTVSHGVNETIYNTTLKYGDVVGVNTTKYPYRVCSMAQGTDL IRFERNIVCTSMKPINEDLDEGIMVVYKRNIVAHTFKVRVYQKVLTFRRSYAYIHTTY LLGSNTEYVAPPMWEIHHINSHSQCYSSYSRVIAGTVFVAYHRDSYENKTMQLMPDDY SNTHSTRYVTVKDQWHSRGSTWLYRETCNLNCMVTITTARSKYPYHFFATSTGDVVDI SPFYNGTNRNASYFGENADKFFIFPNYTIVSDFGRPNSALETHRLVAFLERADSVISW DIQDEKNVTCQLTFWEASERTIRSEAEDSYHFSSAKMTATFLSKKQEVNMSDSALDCV …
84046	SNV	C	G	0.0397373	5	13	38.4615	1	17	5.88235		No	UL55	HHV5wtgp060	type 1 membrane protein; possible membrane fusogen; binds cell surface heparan sulphate; involved in cell entry; involved in cell-to-cell spread	envelope glycoprotein B	AAR31620.1	GI:39842076	MESRIWCLVVCVNLCIVCLGAAVSSSSTRGTSATHSHHSSHTTS AAHSRSGSVSQRVTSSQTVSHGVNETIYNTTLKYGDVVGVNTTKYPYRVCSMAQGTDL IRFERNIVCTSMKPINEDLDEGIMVVYKRNIVAHTFKVRVYQKVLTFRRSYAYIHTTY LLGSNTEYVAPPMWEIHHINSHSQCYSSYSRVIAGTVFVAYHRDSYENKTMQLMPDDY SNTHSTRYVTVKDQWHSRGSTWLYRETCNLNCMVTITTARSKYPYHFFATSTGDVVDI SPFYNGTNRNASYFGENADKFFIFPNYTIVSDFGRPNSALETHRLVAFLERADSVISW DIQDEKNVTCQLTFWEASERTIRSEAEDSYHFSSAKMTATFLSKKQEVNMSDSALDCV …
84058	SNV	C	T	0.0397373	5	13	38.4615	1	17	5.88235		No	UL55	HHV5wtgp060	type 1 membrane protein; possible membrane fusogen; binds cell surface heparan sulphate; involved in cell entry; involved in cell-to-cell spread	envelope glycoprotein B	AAR31620.1	GI:39842076	MESRIWCLVVCVNLCIVCLGAAVSSSSTRGTSATHSHHSSHTTS AAHSRSGSVSQRVTSSQTVSHGVNETIYNTTLKYGDVVGVNTTKYPYRVCSMAQGTDL IRFERNIVCTSMKPINEDLDEGIMVVYKRNIVAHTFKVRVYQKVLTFRRSYAYIHTTY LLGSNTEYVAPPMWEIHHINSHSQCYSSYSRVIAGTVFVAYHRDSYENKTMQLMPDDY SNTHSTRYVTVKDQWHSRGSTWLYRETCNLNCMVTITTARSKYPYHFFATSTGDVVDI SPFYNGTNRNASYFGENADKFFIFPNYTIVSDFGRPNSALETHRLVAFLERADSVISW DIQDEKNVTCQLTFWEASERTIRSEAEDSYHFSSAKMTATFLSKKQEVNMSDSALDCV …
84062	SNV	C	T	0.0397373	5	13	38.4615	1	17	5.88235	AAR31620.1:p.Arg243His	Yes	UL55	HHV5wtgp060	type 1 membrane protein; possible membrane fusogen; binds cell surface heparan sulphate; involved in cell entry; involved in cell-to-cell spread	envelope glycoprotein B	AAR31620.1	GI:39842076	MESRIWCLVVCVNLCIVCLGAAVSSSSTRGTSATHSHHSSHTTS AAHSRSGSVSQRVTSSQTVSHGVNETIYNTTLKYGDVVGVNTTKYPYRVCSMAQGTDL IRFERNIVCTSMKPINEDLDEGIMVVYKRNIVAHTFKVRVYQKVLTFRRSYAYIHTTY LLGSNTEYVAPPMWEIHHINSHSQCYSSYSRVIAGTVFVAYHRDSYENKTMQLMPDDY SNTHSTRYVTVKDQWHSRGSTWLYRETCNLNCMVTITTARSKYPYHFFATSTGDVVDI SPFYNGTNRNASYFGENADKFFIFPNYTIVSDFGRPNSALETHRLVAFLERADSVISW DIQDEKNVTCQLTFWEASERTIRSEAEDSYHFSSAKMTATFLSKKQEVNMSDSALDCV …
84112	SNV	G	A	0.0397373	5	13	38.4615	1	17	5.88235		No	UL55	HHV5wtgp060	type 1 membrane protein; possible membrane fusogen; binds cell surface heparan sulphate; involved in cell entry; involved in cell-to-cell spread	envelope glycoprotein B	AAR31620.1	GI:39842076	MESRIWCLVVCVNLCIVCLGAAVSSSSTRGTSATHSHHSSHTTS AAHSRSGSVSQRVTSSQTVSHGVNETIYNTTLKYGDVVGVNTTKYPYRVCSMAQGTDL IRFERNIVCTSMKPINEDLDEGIMVVYKRNIVAHTFKVRVYQKVLTFRRSYAYIHTTY LLGSNTEYVAPPMWEIHHINSHSQCYSSYSRVIAGTVFVAYHRDSYENKTMQLMPDDY SNTHSTRYVTVKDQWHSRGSTWLYRETCNLNCMVTITTARSKYPYHFFATSTGDVVDI SPFYNGTNRNASYFGENADKFFIFPNYTIVSDFGRPNSALETHRLVAFLERADSVISW DIQDEKNVTCQLTFWEASERTIRSEAEDSYHFSSAKMTATFLSKKQEVNMSDSALDCV …
84147	SNV	G	A	0.0397373	5	13	38.4615	1	17	5.88235	AAR31620.1:p.Pro215Ser	Yes	UL55	HHV5wtgp060	type 1 membrane protein; possible membrane fusogen; binds cell surface heparan sulphate; involved in cell entry; involved in cell-to-cell spread	envelope glycoprotein B	AAR31620.1	GI:39842076	MESRIWCLVVCVNLCIVCLGAAVSSSSTRGTSATHSHHSSHTTS AAHSRSGSVSQRVTSSQTVSHGVNETIYNTTLKYGDVVGVNTTKYPYRVCSMAQGTDL IRFERNIVCTSMKPINEDLDEGIMVVYKRNIVAHTFKVRVYQKVLTFRRSYAYIHTTY LLGSNTEYVAPPMWEIHHINSHSQCYSSYSRVIAGTVFVAYHRDSYENKTMQLMPDDY SNTHSTRYVTVKDQWHSRGSTWLYRETCNLNCMVTITTARSKYPYHFFATSTGDVVDI SPFYNGTNRNASYFGENADKFFIFPNYTIVSDFGRPNSALETHRLVAFLERADSVISW DIQDEKNVTCQLTFWEASERTIRSEAEDSYHFSSAKMTATFLSKKQEVNMSDSALDCV …
84201	SNV	C	G	0.0397373	5	13	38.4615	1	17	5.88235	AAR31620.1:p.Val197Leu	Yes	UL55	HHV5wtgp060	type 1 membrane protein; possible membrane fusogen; binds cell surface heparan sulphate; involved in cell entry; involved in cell-to-cell spread	envelope glycoprotein B	AAR31620.1	GI:39842076	MESRIWCLVVCVNLCIVCLGAAVSSSSTRGTSATHSHHSSHTTS AAHSRSGSVSQRVTSSQTVSHGVNETIYNTTLKYGDVVGVNTTKYPYRVCSMAQGTDL IRFERNIVCTSMKPINEDLDEGIMVVYKRNIVAHTFKVRVYQKVLTFRRSYAYIHTTY LLGSNTEYVAPPMWEIHHINSHSQCYSSYSRVIAGTVFVAYHRDSYENKTMQLMPDDY SNTHSTRYVTVKDQWHSRGSTWLYRETCNLNCMVTITTARSKYPYHFFATSTGDVVDI SPFYNGTNRNASYFGENADKFFIFPNYTIVSDFGRPNSALETHRLVAFLERADSVISW DIQDEKNVTCQLTFWEASERTIRSEAEDSYHFSSAKMTATFLSKKQEVNMSDSALDCV …
84217	SNV	G	A	0.0397373	5	13	38.4615	1	17	5.88235		No	UL55	HHV5wtgp060	type 1 membrane protein; possible membrane fusogen; binds cell surface heparan sulphate; involved in cell entry; involved in cell-to-cell spread	envelope glycoprotein B	AAR31620.1	GI:39842076	MESRIWCLVVCVNLCIVCLGAAVSSSSTRGTSATHSHHSSHTTS AAHSRSGSVSQRVTSSQTVSHGVNETIYNTTLKYGDVVGVNTTKYPYRVCSMAQGTDL IRFERNIVCTSMKPINEDLDEGIMVVYKRNIVAHTFKVRVYQKVLTFRRSYAYIHTTY LLGSNTEYVAPPMWEIHHINSHSQCYSSYSRVIAGTVFVAYHRDSYENKTMQLMPDDY SNTHSTRYVTVKDQWHSRGSTWLYRETCNLNCMVTITTARSKYPYHFFATSTGDVVDI SPFYNGTNRNASYFGENADKFFIFPNYTIVSDFGRPNSALETHRLVAFLERADSVISW DIQDEKNVTCQLTFWEASERTIRSEAEDSYHFSSAKMTATFLSKKQEVNMSDSALDCV …
84223	SNV	G	A	0.0397373	5	13	38.4615	1	17	5.88235		No	UL55	HHV5wtgp060	type 1 membrane protein; possible membrane fusogen; binds cell surface heparan sulphate; involved in cell entry; involved in cell-to-cell spread	envelope glycoprotein B	AAR31620.1	GI:39842076	MESRIWCLVVCVNLCIVCLGAAVSSSSTRGTSATHSHHSSHTTS AAHSRSGSVSQRVTSSQTVSHGVNETIYNTTLKYGDVVGVNTTKYPYRVCSMAQGTDL IRFERNIVCTSMKPINEDLDEGIMVVYKRNIVAHTFKVRVYQKVLTFRRSYAYIHTTY LLGSNTEYVAPPMWEIHHINSHSQCYSSYSRVIAGTVFVAYHRDSYENKTMQLMPDDY SNTHSTRYVTVKDQWHSRGSTWLYRETCNLNCMVTITTARSKYPYHFFATSTGDVVDI SPFYNGTNRNASYFGENADKFFIFPNYTIVSDFGRPNSALETHRLVAFLERADSVISW DIQDEKNVTCQLTFWEASERTIRSEAEDSYHFSSAKMTATFLSKKQEVNMSDSALDCV …
84232	SNV	G	A	0.0397373	5	13	38.4615	1	17	5.88235		No	UL55	HHV5wtgp060	type 1 membrane protein; possible membrane fusogen; binds cell surface heparan sulphate; involved in cell entry; involved in cell-to-cell spread	envelope glycoprotein B	AAR31620.1	GI:39842076	MESRIWCLVVCVNLCIVCLGAAVSSSSTRGTSATHSHHSSHTTS AAHSRSGSVSQRVTSSQTVSHGVNETIYNTTLKYGDVVGVNTTKYPYRVCSMAQGTDL IRFERNIVCTSMKPINEDLDEGIMVVYKRNIVAHTFKVRVYQKVLTFRRSYAYIHTTY LLGSNTEYVAPPMWEIHHINSHSQCYSSYSRVIAGTVFVAYHRDSYENKTMQLMPDDY SNTHSTRYVTVKDQWHSRGSTWLYRETCNLNCMVTITTARSKYPYHFFATSTGDVVDI SPFYNGTNRNASYFGENADKFFIFPNYTIVSDFGRPNSALETHRLVAFLERADSVISW DIQDEKNVTCQLTFWEASERTIRSEAEDSYHFSSAKMTATFLSKKQEVNMSDSALDCV …
84241	SNV	A	G	0.0151724	6	13	46.1538	1	17	5.88235		No	UL55	HHV5wtgp060	type 1 membrane protein; possible membrane fusogen; binds cell surface heparan sulphate; involved in cell entry; involved in cell-to-cell spread	envelope glycoprotein B	AAR31620.1	GI:39842076	MESRIWCLVVCVNLCIVCLGAAVSSSSTRGTSATHSHHSSHTTS AAHSRSGSVSQRVTSSQTVSHGVNETIYNTTLKYGDVVGVNTTKYPYRVCSMAQGTDL IRFERNIVCTSMKPINEDLDEGIMVVYKRNIVAHTFKVRVYQKVLTFRRSYAYIHTTY LLGSNTEYVAPPMWEIHHINSHSQCYSSYSRVIAGTVFVAYHRDSYENKTMQLMPDDY SNTHSTRYVTVKDQWHSRGSTWLYRETCNLNCMVTITTARSKYPYHFFATSTGDVVDI SPFYNGTNRNASYFGENADKFFIFPNYTIVSDFGRPNSALETHRLVAFLERADSVISW DIQDEKNVTCQLTFWEASERTIRSEAEDSYHFSSAKMTATFLSKKQEVNMSDSALDCV …
84241..84248	MNV	ACTGTGGC	GGCAAACT	0.0151724	6	13	46.1538	1	17	5.88235	AAR31620.1:p.Ser181_Ser183delinsLysPheAla	Yes	UL55	HHV5wtgp060	type 1 membrane protein; possible membrane fusogen; binds cell surface heparan sulphate; involved in cell entry; involved in cell-to-cell spread	envelope glycoprotein B	AAR31620.1	GI:39842076	MESRIWCLVVCVNLCIVCLGAAVSSSSTRGTSATHSHHSSHTTS AAHSRSGSVSQRVTSSQTVSHGVNETIYNTTLKYGDVVGVNTTKYPYRVCSMAQGTDL IRFERNIVCTSMKPINEDLDEGIMVVYKRNIVAHTFKVRVYQKVLTFRRSYAYIHTTY LLGSNTEYVAPPMWEIHHINSHSQCYSSYSRVIAGTVFVAYHRDSYENKTMQLMPDDY SNTHSTRYVTVKDQWHSRGSTWLYRETCNLNCMVTITTARSKYPYHFFATSTGDVVDI SPFYNGTNRNASYFGENADKFFIFPNYTIVSDFGRPNSALETHRLVAFLERADSVISW DIQDEKNVTCQLTFWEASERTIRSEAEDSYHFSSAKMTATFLSKKQEVNMSDSALDCV …
84242..84248	MNV	CTGTGGC	GCAAACT	0.00623974	8	13	61.5385	2	17	11.7647	AAR31620.1:p.Ser181_Ser183delinsLysPheAla	Yes	UL55	HHV5wtgp060	type 1 membrane protein; possible membrane fusogen; binds cell surface heparan sulphate; involved in cell entry; involved in cell-to-cell spread	envelope glycoprotein B	AAR31620.1	GI:39842076	MESRIWCLVVCVNLCIVCLGAAVSSSSTRGTSATHSHHSSHTTS AAHSRSGSVSQRVTSSQTVSHGVNETIYNTTLKYGDVVGVNTTKYPYRVCSMAQGTDL IRFERNIVCTSMKPINEDLDEGIMVVYKRNIVAHTFKVRVYQKVLTFRRSYAYIHTTY LLGSNTEYVAPPMWEIHHINSHSQCYSSYSRVIAGTVFVAYHRDSYENKTMQLMPDDY SNTHSTRYVTVKDQWHSRGSTWLYRETCNLNCMVTITTARSKYPYHFFATSTGDVVDI SPFYNGTNRNASYFGENADKFFIFPNYTIVSDFGRPNSALETHRLVAFLERADSVISW DIQDEKNVTCQLTFWEASERTIRSEAEDSYHFSSAKMTATFLSKKQEVNMSDSALDCV …
84256	SNV	A	G	0.00623974	8	13	61.5385	2	17	11.7647		No	UL55	HHV5wtgp060	type 1 membrane protein; possible membrane fusogen; binds cell surface heparan sulphate; involved in cell entry; involved in cell-to-cell spread	envelope glycoprotein B	AAR31620.1	GI:39842076	MESRIWCLVVCVNLCIVCLGAAVSSSSTRGTSATHSHHSSHTTS AAHSRSGSVSQRVTSSQTVSHGVNETIYNTTLKYGDVVGVNTTKYPYRVCSMAQGTDL IRFERNIVCTSMKPINEDLDEGIMVVYKRNIVAHTFKVRVYQKVLTFRRSYAYIHTTY LLGSNTEYVAPPMWEIHHINSHSQCYSSYSRVIAGTVFVAYHRDSYENKTMQLMPDDY SNTHSTRYVTVKDQWHSRGSTWLYRETCNLNCMVTITTARSKYPYHFFATSTGDVVDI SPFYNGTNRNASYFGENADKFFIFPNYTIVSDFGRPNSALETHRLVAFLERADSVISW DIQDEKNVTCQLTFWEASERTIRSEAEDSYHFSSAKMTATFLSKKQEVNMSDSALDCV …
84313	SNV	A	G	0.0397373	5	13	38.4615	1	17	5.88235		No	UL55	HHV5wtgp060	type 1 membrane protein; possible membrane fusogen; binds cell surface heparan sulphate; involved in cell entry; involved in cell-to-cell spread	envelope glycoprotein B	AAR31620.1	GI:39842076	MESRIWCLVVCVNLCIVCLGAAVSSSSTRGTSATHSHHSSHTTS AAHSRSGSVSQRVTSSQTVSHGVNETIYNTTLKYGDVVGVNTTKYPYRVCSMAQGTDL IRFERNIVCTSMKPINEDLDEGIMVVYKRNIVAHTFKVRVYQKVLTFRRSYAYIHTTY LLGSNTEYVAPPMWEIHHINSHSQCYSSYSRVIAGTVFVAYHRDSYENKTMQLMPDDY SNTHSTRYVTVKDQWHSRGSTWLYRETCNLNCMVTITTARSKYPYHFFATSTGDVVDI SPFYNGTNRNASYFGENADKFFIFPNYTIVSDFGRPNSALETHRLVAFLERADSVISW DIQDEKNVTCQLTFWEASERTIRSEAEDSYHFSSAKMTATFLSKKQEVNMSDSALDCV …
84316	SNV	G	A	0.0151724	6	13	46.1538	1	17	5.88235		No	UL55	HHV5wtgp060	type 1 membrane protein; possible membrane fusogen; binds cell surface heparan sulphate; involved in cell entry; involved in cell-to-cell spread	envelope glycoprotein B	AAR31620.1	GI:39842076	MESRIWCLVVCVNLCIVCLGAAVSSSSTRGTSATHSHHSSHTTS AAHSRSGSVSQRVTSSQTVSHGVNETIYNTTLKYGDVVGVNTTKYPYRVCSMAQGTDL IRFERNIVCTSMKPINEDLDEGIMVVYKRNIVAHTFKVRVYQKVLTFRRSYAYIHTTY LLGSNTEYVAPPMWEIHHINSHSQCYSSYSRVIAGTVFVAYHRDSYENKTMQLMPDDY SNTHSTRYVTVKDQWHSRGSTWLYRETCNLNCMVTITTARSKYPYHFFATSTGDVVDI SPFYNGTNRNASYFGENADKFFIFPNYTIVSDFGRPNSALETHRLVAFLERADSVISW DIQDEKNVTCQLTFWEASERTIRSEAEDSYHFSSAKMTATFLSKKQEVNMSDSALDCV …
84316..84317	MNV	GG	AC	0.0397373	5	13	38.4615	1	17	5.88235	AAR31620.1:p.Thr158Ser	Yes	UL55	HHV5wtgp060	type 1 membrane protein; possible membrane fusogen; binds cell surface heparan sulphate; involved in cell entry; involved in cell-to-cell spread	envelope glycoprotein B	AAR31620.1	GI:39842076	MESRIWCLVVCVNLCIVCLGAAVSSSSTRGTSATHSHHSSHTTS AAHSRSGSVSQRVTSSQTVSHGVNETIYNTTLKYGDVVGVNTTKYPYRVCSMAQGTDL IRFERNIVCTSMKPINEDLDEGIMVVYKRNIVAHTFKVRVYQKVLTFRRSYAYIHTTY LLGSNTEYVAPPMWEIHHINSHSQCYSSYSRVIAGTVFVAYHRDSYENKTMQLMPDDY SNTHSTRYVTVKDQWHSRGSTWLYRETCNLNCMVTITTARSKYPYHFFATSTGDVVDI SPFYNGTNRNASYFGENADKFFIFPNYTIVSDFGRPNSALETHRLVAFLERADSVISW DIQDEKNVTCQLTFWEASERTIRSEAEDSYHFSSAKMTATFLSKKQEVNMSDSALDCV …
84321	SNV	G	A	0.00623974	8	13	61.5385	2	17	11.7647	AAR31620.1:p.His157Tyr	Yes	UL55	HHV5wtgp060	type 1 membrane protein; possible membrane fusogen; binds cell surface heparan sulphate; involved in cell entry; involved in cell-to-cell spread	envelope glycoprotein B	AAR31620.1	GI:39842076	MESRIWCLVVCVNLCIVCLGAAVSSSSTRGTSATHSHHSSHTTS AAHSRSGSVSQRVTSSQTVSHGVNETIYNTTLKYGDVVGVNTTKYPYRVCSMAQGTDL IRFERNIVCTSMKPINEDLDEGIMVVYKRNIVAHTFKVRVYQKVLTFRRSYAYIHTTY LLGSNTEYVAPPMWEIHHINSHSQCYSSYSRVIAGTVFVAYHRDSYENKTMQLMPDDY SNTHSTRYVTVKDQWHSRGSTWLYRETCNLNCMVTITTARSKYPYHFFATSTGDVVDI SPFYNGTNRNASYFGENADKFFIFPNYTIVSDFGRPNSALETHRLVAFLERADSVISW DIQDEKNVTCQLTFWEASERTIRSEAEDSYHFSSAKMTATFLSKKQEVNMSDSALDCV …
84321..84322	MNV	GG	AT	0.0397373	5	13	38.4615	1	17	5.88235	AAR31620.1:p.His157Tyr	Yes	UL55	HHV5wtgp060	type 1 membrane protein; possible membrane fusogen; binds cell surface heparan sulphate; involved in cell entry; involved in cell-to-cell spread	envelope glycoprotein B	AAR31620.1	GI:39842076	MESRIWCLVVCVNLCIVCLGAAVSSSSTRGTSATHSHHSSHTTS AAHSRSGSVSQRVTSSQTVSHGVNETIYNTTLKYGDVVGVNTTKYPYRVCSMAQGTDL IRFERNIVCTSMKPINEDLDEGIMVVYKRNIVAHTFKVRVYQKVLTFRRSYAYIHTTY LLGSNTEYVAPPMWEIHHINSHSQCYSSYSRVIAGTVFVAYHRDSYENKTMQLMPDDY SNTHSTRYVTVKDQWHSRGSTWLYRETCNLNCMVTITTARSKYPYHFFATSTGDVVDI SPFYNGTNRNASYFGENADKFFIFPNYTIVSDFGRPNSALETHRLVAFLERADSVISW DIQDEKNVTCQLTFWEASERTIRSEAEDSYHFSSAKMTATFLSKKQEVNMSDSALDCV …
84337	SNV	A	G	0.0397373	5	13	38.4615	1	17	5.88235		No	UL55	HHV5wtgp060	type 1 membrane protein; possible membrane fusogen; binds cell surface heparan sulphate; involved in cell entry; involved in cell-to-cell spread	envelope glycoprotein B	AAR31620.1	GI:39842076	MESRIWCLVVCVNLCIVCLGAAVSSSSTRGTSATHSHHSSHTTS AAHSRSGSVSQRVTSSQTVSHGVNETIYNTTLKYGDVVGVNTTKYPYRVCSMAQGTDL IRFERNIVCTSMKPINEDLDEGIMVVYKRNIVAHTFKVRVYQKVLTFRRSYAYIHTTY LLGSNTEYVAPPMWEIHHINSHSQCYSSYSRVIAGTVFVAYHRDSYENKTMQLMPDDY SNTHSTRYVTVKDQWHSRGSTWLYRETCNLNCMVTITTARSKYPYHFFATSTGDVVDI SPFYNGTNRNASYFGENADKFFIFPNYTIVSDFGRPNSALETHRLVAFLERADSVISW DIQDEKNVTCQLTFWEASERTIRSEAEDSYHFSSAKMTATFLSKKQEVNMSDSALDCV …
84364	SNV	G	A	0.0397373	5	13	38.4615	1	17	5.88235		No	UL55	HHV5wtgp060	type 1 membrane protein; possible membrane fusogen; binds cell surface heparan sulphate; involved in cell entry; involved in cell-to-cell spread	envelope glycoprotein B	AAR31620.1	GI:39842076	MESRIWCLVVCVNLCIVCLGAAVSSSSTRGTSATHSHHSSHTTS AAHSRSGSVSQRVTSSQTVSHGVNETIYNTTLKYGDVVGVNTTKYPYRVCSMAQGTDL IRFERNIVCTSMKPINEDLDEGIMVVYKRNIVAHTFKVRVYQKVLTFRRSYAYIHTTY LLGSNTEYVAPPMWEIHHINSHSQCYSSYSRVIAGTVFVAYHRDSYENKTMQLMPDDY SNTHSTRYVTVKDQWHSRGSTWLYRETCNLNCMVTITTARSKYPYHFFATSTGDVVDI SPFYNGTNRNASYFGENADKFFIFPNYTIVSDFGRPNSALETHRLVAFLERADSVISW DIQDEKNVTCQLTFWEASERTIRSEAEDSYHFSSAKMTATFLSKKQEVNMSDSALDCV …
84400	SNV	T	C	0.00623974	8	13	61.5385	2	17	11.7647		No	UL55	HHV5wtgp060	type 1 membrane protein; possible membrane fusogen; binds cell surface heparan sulphate; involved in cell entry; involved in cell-to-cell spread	envelope glycoprotein B	AAR31620.1	GI:39842076	MESRIWCLVVCVNLCIVCLGAAVSSSSTRGTSATHSHHSSHTTS AAHSRSGSVSQRVTSSQTVSHGVNETIYNTTLKYGDVVGVNTTKYPYRVCSMAQGTDL IRFERNIVCTSMKPINEDLDEGIMVVYKRNIVAHTFKVRVYQKVLTFRRSYAYIHTTY LLGSNTEYVAPPMWEIHHINSHSQCYSSYSRVIAGTVFVAYHRDSYENKTMQLMPDDY SNTHSTRYVTVKDQWHSRGSTWLYRETCNLNCMVTITTARSKYPYHFFATSTGDVVDI SPFYNGTNRNASYFGENADKFFIFPNYTIVSDFGRPNSALETHRLVAFLERADSVISW DIQDEKNVTCQLTFWEASERTIRSEAEDSYHFSSAKMTATFLSKKQEVNMSDSALDCV …
84450	SNV	T	C	0.0397373	5	13	38.4615	1	17	5.88235	AAR31620.1:p.Met114Val	Yes	UL55	HHV5wtgp060	type 1 membrane protein; possible membrane fusogen; binds cell surface heparan sulphate; involved in cell entry; involved in cell-to-cell spread	envelope glycoprotein B	AAR31620.1	GI:39842076	MESRIWCLVVCVNLCIVCLGAAVSSSSTRGTSATHSHHSSHTTS AAHSRSGSVSQRVTSSQTVSHGVNETIYNTTLKYGDVVGVNTTKYPYRVCSMAQGTDL IRFERNIVCTSMKPINEDLDEGIMVVYKRNIVAHTFKVRVYQKVLTFRRSYAYIHTTY LLGSNTEYVAPPMWEIHHINSHSQCYSSYSRVIAGTVFVAYHRDSYENKTMQLMPDDY SNTHSTRYVTVKDQWHSRGSTWLYRETCNLNCMVTITTARSKYPYHFFATSTGDVVDI SPFYNGTNRNASYFGENADKFFIFPNYTIVSDFGRPNSALETHRLVAFLERADSVISW DIQDEKNVTCQLTFWEASERTIRSEAEDSYHFSSAKMTATFLSKKQEVNMSDSALDCV …
84453..84454	MNV	AG	GA	0.0397373	5	13	38.4615	1	17	5.88235	AAR31620.1:p.Ser113Pro	Yes	UL55	HHV5wtgp060	type 1 membrane protein; possible membrane fusogen; binds cell surface heparan sulphate; involved in cell entry; involved in cell-to-cell spread	envelope glycoprotein B	AAR31620.1	GI:39842076	MESRIWCLVVCVNLCIVCLGAAVSSSSTRGTSATHSHHSSHTTS AAHSRSGSVSQRVTSSQTVSHGVNETIYNTTLKYGDVVGVNTTKYPYRVCSMAQGTDL IRFERNIVCTSMKPINEDLDEGIMVVYKRNIVAHTFKVRVYQKVLTFRRSYAYIHTTY LLGSNTEYVAPPMWEIHHINSHSQCYSSYSRVIAGTVFVAYHRDSYENKTMQLMPDDY SNTHSTRYVTVKDQWHSRGSTWLYRETCNLNCMVTITTARSKYPYHFFATSTGDVVDI SPFYNGTNRNASYFGENADKFFIFPNYTIVSDFGRPNSALETHRLVAFLERADSVISW DIQDEKNVTCQLTFWEASERTIRSEAEDSYHFSSAKMTATFLSKKQEVNMSDSALDCV …
84475	SNV	A	G	0.0397373	5	13	38.4615	1	17	5.88235		No	UL55	HHV5wtgp060	type 1 membrane protein; possible membrane fusogen; binds cell surface heparan sulphate; involved in cell entry; involved in cell-to-cell spread	envelope glycoprotein B	AAR31620.1	GI:39842076	MESRIWCLVVCVNLCIVCLGAAVSSSSTRGTSATHSHHSSHTTS AAHSRSGSVSQRVTSSQTVSHGVNETIYNTTLKYGDVVGVNTTKYPYRVCSMAQGTDL IRFERNIVCTSMKPINEDLDEGIMVVYKRNIVAHTFKVRVYQKVLTFRRSYAYIHTTY LLGSNTEYVAPPMWEIHHINSHSQCYSSYSRVIAGTVFVAYHRDSYENKTMQLMPDDY SNTHSTRYVTVKDQWHSRGSTWLYRETCNLNCMVTITTARSKYPYHFFATSTGDVVDI SPFYNGTNRNASYFGENADKFFIFPNYTIVSDFGRPNSALETHRLVAFLERADSVISW DIQDEKNVTCQLTFWEASERTIRSEAEDSYHFSSAKMTATFLSKKQEVNMSDSALDCV …
84490	SNV	C	T	0.0397373	5	13	38.4615	1	17	5.88235		No	UL55	HHV5wtgp060	type 1 membrane protein; possible membrane fusogen; binds cell surface heparan sulphate; involved in cell entry; involved in cell-to-cell spread	envelope glycoprotein B	AAR31620.1	GI:39842076	MESRIWCLVVCVNLCIVCLGAAVSSSSTRGTSATHSHHSSHTTS AAHSRSGSVSQRVTSSQTVSHGVNETIYNTTLKYGDVVGVNTTKYPYRVCSMAQGTDL IRFERNIVCTSMKPINEDLDEGIMVVYKRNIVAHTFKVRVYQKVLTFRRSYAYIHTTY LLGSNTEYVAPPMWEIHHINSHSQCYSSYSRVIAGTVFVAYHRDSYENKTMQLMPDDY SNTHSTRYVTVKDQWHSRGSTWLYRETCNLNCMVTITTARSKYPYHFFATSTGDVVDI SPFYNGTNRNASYFGENADKFFIFPNYTIVSDFGRPNSALETHRLVAFLERADSVISW DIQDEKNVTCQLTFWEASERTIRSEAEDSYHFSSAKMTATFLSKKQEVNMSDSALDCV …
84493	SNV	A	G	0.0397373	5	13	38.4615	1	17	5.88235		No	UL55	HHV5wtgp060	type 1 membrane protein; possible membrane fusogen; binds cell surface heparan sulphate; involved in cell entry; involved in cell-to-cell spread	envelope glycoprotein B	AAR31620.1	GI:39842076	MESRIWCLVVCVNLCIVCLGAAVSSSSTRGTSATHSHHSSHTTS AAHSRSGSVSQRVTSSQTVSHGVNETIYNTTLKYGDVVGVNTTKYPYRVCSMAQGTDL IRFERNIVCTSMKPINEDLDEGIMVVYKRNIVAHTFKVRVYQKVLTFRRSYAYIHTTY LLGSNTEYVAPPMWEIHHINSHSQCYSSYSRVIAGTVFVAYHRDSYENKTMQLMPDDY SNTHSTRYVTVKDQWHSRGSTWLYRETCNLNCMVTITTARSKYPYHFFATSTGDVVDI SPFYNGTNRNASYFGENADKFFIFPNYTIVSDFGRPNSALETHRLVAFLERADSVISW DIQDEKNVTCQLTFWEASERTIRSEAEDSYHFSSAKMTATFLSKKQEVNMSDSALDCV …
84532	SNV	G	A	0.00623974	8	13	61.5385	2	17	11.7647		No	UL55	HHV5wtgp060	type 1 membrane protein; possible membrane fusogen; binds cell surface heparan sulphate; involved in cell entry; involved in cell-to-cell spread	envelope glycoprotein B	AAR31620.1	GI:39842076	MESRIWCLVVCVNLCIVCLGAAVSSSSTRGTSATHSHHSSHTTS AAHSRSGSVSQRVTSSQTVSHGVNETIYNTTLKYGDVVGVNTTKYPYRVCSMAQGTDL IRFERNIVCTSMKPINEDLDEGIMVVYKRNIVAHTFKVRVYQKVLTFRRSYAYIHTTY LLGSNTEYVAPPMWEIHHINSHSQCYSSYSRVIAGTVFVAYHRDSYENKTMQLMPDDY SNTHSTRYVTVKDQWHSRGSTWLYRETCNLNCMVTITTARSKYPYHFFATSTGDVVDI SPFYNGTNRNASYFGENADKFFIFPNYTIVSDFGRPNSALETHRLVAFLERADSVISW DIQDEKNVTCQLTFWEASERTIRSEAEDSYHFSSAKMTATFLSKKQEVNMSDSALDCV …
84565	SNV	G	A	0.0397373	5	13	38.4615	1	17	5.88235		No	UL55	HHV5wtgp060	type 1 membrane protein; possible membrane fusogen; binds cell surface heparan sulphate; involved in cell entry; involved in cell-to-cell spread	envelope glycoprotein B	AAR31620.1	GI:39842076	MESRIWCLVVCVNLCIVCLGAAVSSSSTRGTSATHSHHSSHTTS AAHSRSGSVSQRVTSSQTVSHGVNETIYNTTLKYGDVVGVNTTKYPYRVCSMAQGTDL IRFERNIVCTSMKPINEDLDEGIMVVYKRNIVAHTFKVRVYQKVLTFRRSYAYIHTTY LLGSNTEYVAPPMWEIHHINSHSQCYSSYSRVIAGTVFVAYHRDSYENKTMQLMPDDY SNTHSTRYVTVKDQWHSRGSTWLYRETCNLNCMVTITTARSKYPYHFFATSTGDVVDI SPFYNGTNRNASYFGENADKFFIFPNYTIVSDFGRPNSALETHRLVAFLERADSVISW DIQDEKNVTCQLTFWEASERTIRSEAEDSYHFSSAKMTATFLSKKQEVNMSDSALDCV …
84592..84593	MNV	AC	GT	0.0397373	5	13	38.4615	1	17	5.88235	AAR31620.1:p.Gly66Asp	Yes	UL55	HHV5wtgp060	type 1 membrane protein; possible membrane fusogen; binds cell surface heparan sulphate; involved in cell entry; involved in cell-to-cell spread	envelope glycoprotein B	AAR31620.1	GI:39842076	MESRIWCLVVCVNLCIVCLGAAVSSSSTRGTSATHSHHSSHTTS AAHSRSGSVSQRVTSSQTVSHGVNETIYNTTLKYGDVVGVNTTKYPYRVCSMAQGTDL IRFERNIVCTSMKPINEDLDEGIMVVYKRNIVAHTFKVRVYQKVLTFRRSYAYIHTTY LLGSNTEYVAPPMWEIHHINSHSQCYSSYSRVIAGTVFVAYHRDSYENKTMQLMPDDY SNTHSTRYVTVKDQWHSRGSTWLYRETCNLNCMVTITTARSKYPYHFFATSTGDVVDI SPFYNGTNRNASYFGENADKFFIFPNYTIVSDFGRPNSALETHRLVAFLERADSVISW DIQDEKNVTCQLTFWEASERTIRSEAEDSYHFSSAKMTATFLSKKQEVNMSDSALDCV …
84644	SNV	C	T	0.0397373	5	13	38.4615	1	17	5.88235	AAR31620.1:p.Arg49Gln	Yes	UL55	HHV5wtgp060	type 1 membrane protein; possible membrane fusogen; binds cell surface heparan sulphate; involved in cell entry; involved in cell-to-cell spread	envelope glycoprotein B	AAR31620.1	GI:39842076	MESRIWCLVVCVNLCIVCLGAAVSSSSTRGTSATHSHHSSHTTS AAHSRSGSVSQRVTSSQTVSHGVNETIYNTTLKYGDVVGVNTTKYPYRVCSMAQGTDL IRFERNIVCTSMKPINEDLDEGIMVVYKRNIVAHTFKVRVYQKVLTFRRSYAYIHTTY LLGSNTEYVAPPMWEIHHINSHSQCYSSYSRVIAGTVFVAYHRDSYENKTMQLMPDDY SNTHSTRYVTVKDQWHSRGSTWLYRETCNLNCMVTITTARSKYPYHFFATSTGDVVDI SPFYNGTNRNASYFGENADKFFIFPNYTIVSDFGRPNSALETHRLVAFLERADSVISW DIQDEKNVTCQLTFWEASERTIRSEAEDSYHFSSAKMTATFLSKKQEVNMSDSALDCV …
84649..84650	MNV	GT	CC	0.0397373	5	13	38.4615	1	17	5.88235	AAR31620.1:p.His47Arg	Yes	UL55	HHV5wtgp060	type 1 membrane protein; possible membrane fusogen; binds cell surface heparan sulphate; involved in cell entry; involved in cell-to-cell spread	envelope glycoprotein B	AAR31620.1	GI:39842076	MESRIWCLVVCVNLCIVCLGAAVSSSSTRGTSATHSHHSSHTTS AAHSRSGSVSQRVTSSQTVSHGVNETIYNTTLKYGDVVGVNTTKYPYRVCSMAQGTDL IRFERNIVCTSMKPINEDLDEGIMVVYKRNIVAHTFKVRVYQKVLTFRRSYAYIHTTY LLGSNTEYVAPPMWEIHHINSHSQCYSSYSRVIAGTVFVAYHRDSYENKTMQLMPDDY SNTHSTRYVTVKDQWHSRGSTWLYRETCNLNCMVTITTARSKYPYHFFATSTGDVVDI SPFYNGTNRNASYFGENADKFFIFPNYTIVSDFGRPNSALETHRLVAFLERADSVISW DIQDEKNVTCQLTFWEASERTIRSEAEDSYHFSSAKMTATFLSKKQEVNMSDSALDCV …
84655	SNV	A	G	0.0397373	5	13	38.4615	1	17	5.88235		No	UL55	HHV5wtgp060	type 1 membrane protein; possible membrane fusogen; binds cell surface heparan sulphate; involved in cell entry; involved in cell-to-cell spread	envelope glycoprotein B	AAR31620.1	GI:39842076	MESRIWCLVVCVNLCIVCLGAAVSSSSTRGTSATHSHHSSHTTS AAHSRSGSVSQRVTSSQTVSHGVNETIYNTTLKYGDVVGVNTTKYPYRVCSMAQGTDL IRFERNIVCTSMKPINEDLDEGIMVVYKRNIVAHTFKVRVYQKVLTFRRSYAYIHTTY LLGSNTEYVAPPMWEIHHINSHSQCYSSYSRVIAGTVFVAYHRDSYENKTMQLMPDDY SNTHSTRYVTVKDQWHSRGSTWLYRETCNLNCMVTITTARSKYPYHFFATSTGDVVDI SPFYNGTNRNASYFGENADKFFIFPNYTIVSDFGRPNSALETHRLVAFLERADSVISW DIQDEKNVTCQLTFWEASERTIRSEAEDSYHFSSAKMTATFLSKKQEVNMSDSALDCV …
84689	SNV	G	A	0.0397373	5	13	38.4615	1	17	5.88235	AAR31620.1:p.Thr34Ile	Yes	UL55	HHV5wtgp060	type 1 membrane protein; possible membrane fusogen; binds cell surface heparan sulphate; involved in cell entry; involved in cell-to-cell spread	envelope glycoprotein B	AAR31620.1	GI:39842076	MESRIWCLVVCVNLCIVCLGAAVSSSSTRGTSATHSHHSSHTTS AAHSRSGSVSQRVTSSQTVSHGVNETIYNTTLKYGDVVGVNTTKYPYRVCSMAQGTDL IRFERNIVCTSMKPINEDLDEGIMVVYKRNIVAHTFKVRVYQKVLTFRRSYAYIHTTY LLGSNTEYVAPPMWEIHHINSHSQCYSSYSRVIAGTVFVAYHRDSYENKTMQLMPDDY SNTHSTRYVTVKDQWHSRGSTWLYRETCNLNCMVTITTARSKYPYHFFATSTGDVVDI SPFYNGTNRNASYFGENADKFFIFPNYTIVSDFGRPNSALETHRLVAFLERADSVISW DIQDEKNVTCQLTFWEASERTIRSEAEDSYHFSSAKMTATFLSKKQEVNMSDSALDCV …
84689..84690	Deletion	GT	-	0.0397373	5	13	38.4615	1	17	5.88235	AAR31620.1:p.Thr34fs	Yes	UL55	HHV5wtgp060	type 1 membrane protein; possible membrane fusogen; binds cell surface heparan sulphate; involved in cell entry; involved in cell-to-cell spread	envelope glycoprotein B	AAR31620.1	GI:39842076	MESRIWCLVVCVNLCIVCLGAAVSSSSTRGTSATHSHHSSHTTS AAHSRSGSVSQRVTSSQTVSHGVNETIYNTTLKYGDVVGVNTTKYPYRVCSMAQGTDL IRFERNIVCTSMKPINEDLDEGIMVVYKRNIVAHTFKVRVYQKVLTFRRSYAYIHTTY LLGSNTEYVAPPMWEIHHINSHSQCYSSYSRVIAGTVFVAYHRDSYENKTMQLMPDDY SNTHSTRYVTVKDQWHSRGSTWLYRETCNLNCMVTITTARSKYPYHFFATSTGDVVDI SPFYNGTNRNASYFGENADKFFIFPNYTIVSDFGRPNSALETHRLVAFLERADSVISW DIQDEKNVTCQLTFWEASERTIRSEAEDSYHFSSAKMTATFLSKKQEVNMSDSALDCV …
84692..84693	Replacement	GC	T	0.0397373	5	13	38.4615	1	17	5.88235	AAR31620.1:p.Ala33fs	Yes	UL55	HHV5wtgp060	type 1 membrane protein; possible membrane fusogen; binds cell surface heparan sulphate; involved in cell entry; involved in cell-to-cell spread	envelope glycoprotein B	AAR31620.1	GI:39842076	MESRIWCLVVCVNLCIVCLGAAVSSSSTRGTSATHSHHSSHTTS AAHSRSGSVSQRVTSSQTVSHGVNETIYNTTLKYGDVVGVNTTKYPYRVCSMAQGTDL IRFERNIVCTSMKPINEDLDEGIMVVYKRNIVAHTFKVRVYQKVLTFRRSYAYIHTTY LLGSNTEYVAPPMWEIHHINSHSQCYSSYSRVIAGTVFVAYHRDSYENKTMQLMPDDY SNTHSTRYVTVKDQWHSRGSTWLYRETCNLNCMVTITTARSKYPYHFFATSTGDVVDI SPFYNGTNRNASYFGENADKFFIFPNYTIVSDFGRPNSALETHRLVAFLERADSVISW DIQDEKNVTCQLTFWEASERTIRSEAEDSYHFSSAKMTATFLSKKQEVNMSDSALDCV …
84695^84696	Insertion	-	TTCC	0.0397373	5	13	38.4615	1	17	5.88235	AAR31620.1:p.Ser32fs	Yes	UL55	HHV5wtgp060	type 1 membrane protein; possible membrane fusogen; binds cell surface heparan sulphate; involved in cell entry; involved in cell-to-cell spread	envelope glycoprotein B	AAR31620.1	GI:39842076	MESRIWCLVVCVNLCIVCLGAAVSSSSTRGTSATHSHHSSHTTS AAHSRSGSVSQRVTSSQTVSHGVNETIYNTTLKYGDVVGVNTTKYPYRVCSMAQGTDL IRFERNIVCTSMKPINEDLDEGIMVVYKRNIVAHTFKVRVYQKVLTFRRSYAYIHTTY LLGSNTEYVAPPMWEIHHINSHSQCYSSYSRVIAGTVFVAYHRDSYENKTMQLMPDDY SNTHSTRYVTVKDQWHSRGSTWLYRETCNLNCMVTITTARSKYPYHFFATSTGDVVDI SPFYNGTNRNASYFGENADKFFIFPNYTIVSDFGRPNSALETHRLVAFLERADSVISW DIQDEKNVTCQLTFWEASERTIRSEAEDSYHFSSAKMTATFLSKKQEVNMSDSALDCV …
84696^84697	Insertion	-	CG	0.0397373	5	13	38.4615	1	17	5.88235	AAR31620.1:p.Ser32fs	Yes	UL55	HHV5wtgp060	type 1 membrane protein; possible membrane fusogen; binds cell surface heparan sulphate; involved in cell entry; involved in cell-to-cell spread	envelope glycoprotein B	AAR31620.1	GI:39842076	MESRIWCLVVCVNLCIVCLGAAVSSSSTRGTSATHSHHSSHTTS AAHSRSGSVSQRVTSSQTVSHGVNETIYNTTLKYGDVVGVNTTKYPYRVCSMAQGTDL IRFERNIVCTSMKPINEDLDEGIMVVYKRNIVAHTFKVRVYQKVLTFRRSYAYIHTTY LLGSNTEYVAPPMWEIHHINSHSQCYSSYSRVIAGTVFVAYHRDSYENKTMQLMPDDY SNTHSTRYVTVKDQWHSRGSTWLYRETCNLNCMVTITTARSKYPYHFFATSTGDVVDI SPFYNGTNRNASYFGENADKFFIFPNYTIVSDFGRPNSALETHRLVAFLERADSVISW DIQDEKNVTCQLTFWEASERTIRSEAEDSYHFSSAKMTATFLSKKQEVNMSDSALDCV …
84699	SNV	T	A	0.0397373	5	13	38.4615	1	17	5.88235	AAR31620.1:p.Thr31Ser	Yes	UL55	HHV5wtgp060	type 1 membrane protein; possible membrane fusogen; binds cell surface heparan sulphate; involved in cell entry; involved in cell-to-cell spread	envelope glycoprotein B	AAR31620.1	GI:39842076	MESRIWCLVVCVNLCIVCLGAAVSSSSTRGTSATHSHHSSHTTS AAHSRSGSVSQRVTSSQTVSHGVNETIYNTTLKYGDVVGVNTTKYPYRVCSMAQGTDL IRFERNIVCTSMKPINEDLDEGIMVVYKRNIVAHTFKVRVYQKVLTFRRSYAYIHTTY LLGSNTEYVAPPMWEIHHINSHSQCYSSYSRVIAGTVFVAYHRDSYENKTMQLMPDDY SNTHSTRYVTVKDQWHSRGSTWLYRETCNLNCMVTITTARSKYPYHFFATSTGDVVDI SPFYNGTNRNASYFGENADKFFIFPNYTIVSDFGRPNSALETHRLVAFLERADSVISW DIQDEKNVTCQLTFWEASERTIRSEAEDSYHFSSAKMTATFLSKKQEVNMSDSALDCV …
84704..84705	MNV	CG	GT	0.0397373	5	13	38.4615	1	17	5.88235	AAR31620.1:p.Arg29Thr	Yes	UL55	HHV5wtgp060	type 1 membrane protein; possible membrane fusogen; binds cell surface heparan sulphate; involved in cell entry; involved in cell-to-cell spread	envelope glycoprotein B	AAR31620.1	GI:39842076	MESRIWCLVVCVNLCIVCLGAAVSSSSTRGTSATHSHHSSHTTS AAHSRSGSVSQRVTSSQTVSHGVNETIYNTTLKYGDVVGVNTTKYPYRVCSMAQGTDL IRFERNIVCTSMKPINEDLDEGIMVVYKRNIVAHTFKVRVYQKVLTFRRSYAYIHTTY LLGSNTEYVAPPMWEIHHINSHSQCYSSYSRVIAGTVFVAYHRDSYENKTMQLMPDDY SNTHSTRYVTVKDQWHSRGSTWLYRETCNLNCMVTITTARSKYPYHFFATSTGDVVDI SPFYNGTNRNASYFGENADKFFIFPNYTIVSDFGRPNSALETHRLVAFLERADSVISW DIQDEKNVTCQLTFWEASERTIRSEAEDSYHFSSAKMTATFLSKKQEVNMSDSALDCV …
84806	SNV	A	G	0.0397373	5	13	38.4615	1	17	5.88235		No	UL56	HHV5wtgp061	involved in DNA encapsidation	DNA packaging terminase subunit 2	AAR31621.1	GI:39842077	MEMNLLQKLCVVCSKCNEYAMELECLKYCDPNVLLAESTPFKRN AAAIVYLYRKIYPEVVAQNRTQSSLLTLYLEMLLKALHEDTALLDRALMAYSRQPDRA AFYRTVLRLDRCDRHHTVELQFTDNVRFSVSLATLNDIERFLCKMNYVYGILAPEAGL EVCAQLLELLRRLCGISPVARQEVYVEGTTCAQCYEELTIIPNQGRSLNKRLQGLLCN HIAVHRPSSQSDVNIQTVEQDLLDLTTRIPHLAGVLSALKSLFSSSSAYHSYIQEAEE ALREYNLFTDIPERIYSLSDFTYWSRTSEVIVKRVGITIQQLNVYHQLCRALMNGISR HLYGEDVEDIFVLGEKALDGEERMFVGSVFAAPNRIIDLITSLSIQAFEDNPVFNKLH …
84818	SNV	T	G	0.0397373	5	13	38.4615	1	17	5.88235		No	UL56	HHV5wtgp061	involved in DNA encapsidation	DNA packaging terminase subunit 2	AAR31621.1	GI:39842077	MEMNLLQKLCVVCSKCNEYAMELECLKYCDPNVLLAESTPFKRN AAAIVYLYRKIYPEVVAQNRTQSSLLTLYLEMLLKALHEDTALLDRALMAYSRQPDRA AFYRTVLRLDRCDRHHTVELQFTDNVRFSVSLATLNDIERFLCKMNYVYGILAPEAGL EVCAQLLELLRRLCGISPVARQEVYVEGTTCAQCYEELTIIPNQGRSLNKRLQGLLCN HIAVHRPSSQSDVNIQTVEQDLLDLTTRIPHLAGVLSALKSLFSSSSAYHSYIQEAEE ALREYNLFTDIPERIYSLSDFTYWSRTSEVIVKRVGITIQQLNVYHQLCRALMNGISR HLYGEDVEDIFVLGEKALDGEERMFVGSVFAAPNRIIDLITSLSIQAFEDNPVFNKLH …
84851	SNV	G	A	0.0397373	5	13	38.4615	1	17	5.88235		No	UL56	HHV5wtgp061	involved in DNA encapsidation	DNA packaging terminase subunit 2	AAR31621.1	GI:39842077	MEMNLLQKLCVVCSKCNEYAMELECLKYCDPNVLLAESTPFKRN AAAIVYLYRKIYPEVVAQNRTQSSLLTLYLEMLLKALHEDTALLDRALMAYSRQPDRA AFYRTVLRLDRCDRHHTVELQFTDNVRFSVSLATLNDIERFLCKMNYVYGILAPEAGL EVCAQLLELLRRLCGISPVARQEVYVEGTTCAQCYEELTIIPNQGRSLNKRLQGLLCN HIAVHRPSSQSDVNIQTVEQDLLDLTTRIPHLAGVLSALKSLFSSSSAYHSYIQEAEE ALREYNLFTDIPERIYSLSDFTYWSRTSEVIVKRVGITIQQLNVYHQLCRALMNGISR HLYGEDVEDIFVLGEKALDGEERMFVGSVFAAPNRIIDLITSLSIQAFEDNPVFNKLH …
84869	SNV	C	T	0.0397373	5	13	38.4615	1	17	5.88235		No	UL56	HHV5wtgp061	involved in DNA encapsidation	DNA packaging terminase subunit 2	AAR31621.1	GI:39842077	MEMNLLQKLCVVCSKCNEYAMELECLKYCDPNVLLAESTPFKRN AAAIVYLYRKIYPEVVAQNRTQSSLLTLYLEMLLKALHEDTALLDRALMAYSRQPDRA AFYRTVLRLDRCDRHHTVELQFTDNVRFSVSLATLNDIERFLCKMNYVYGILAPEAGL EVCAQLLELLRRLCGISPVARQEVYVEGTTCAQCYEELTIIPNQGRSLNKRLQGLLCN HIAVHRPSSQSDVNIQTVEQDLLDLTTRIPHLAGVLSALKSLFSSSSAYHSYIQEAEE ALREYNLFTDIPERIYSLSDFTYWSRTSEVIVKRVGITIQQLNVYHQLCRALMNGISR HLYGEDVEDIFVLGEKALDGEERMFVGSVFAAPNRIIDLITSLSIQAFEDNPVFNKLH …
85418	SNV	A	G	0.0278761	10	13	76.9231	6	17	35.2941		No	UL56	HHV5wtgp061	involved in DNA encapsidation	DNA packaging terminase subunit 2	AAR31621.1	GI:39842077	MEMNLLQKLCVVCSKCNEYAMELECLKYCDPNVLLAESTPFKRN AAAIVYLYRKIYPEVVAQNRTQSSLLTLYLEMLLKALHEDTALLDRALMAYSRQPDRA AFYRTVLRLDRCDRHHTVELQFTDNVRFSVSLATLNDIERFLCKMNYVYGILAPEAGL EVCAQLLELLRRLCGISPVARQEVYVEGTTCAQCYEELTIIPNQGRSLNKRLQGLLCN HIAVHRPSSQSDVNIQTVEQDLLDLTTRIPHLAGVLSALKSLFSSSSAYHSYIQEAEE ALREYNLFTDIPERIYSLSDFTYWSRTSEVIVKRVGITIQQLNVYHQLCRALMNGISR HLYGEDVEDIFVLGEKALDGEERMFVGSVFAAPNRIIDLITSLSIQAFEDNPVFNKLH …
85430	SNV	G	A	0.0151724	6	13	46.1538	1	17	5.88235		No	UL56	HHV5wtgp061	involved in DNA encapsidation	DNA packaging terminase subunit 2	AAR31621.1	GI:39842077	MEMNLLQKLCVVCSKCNEYAMELECLKYCDPNVLLAESTPFKRN AAAIVYLYRKIYPEVVAQNRTQSSLLTLYLEMLLKALHEDTALLDRALMAYSRQPDRA AFYRTVLRLDRCDRHHTVELQFTDNVRFSVSLATLNDIERFLCKMNYVYGILAPEAGL EVCAQLLELLRRLCGISPVARQEVYVEGTTCAQCYEELTIIPNQGRSLNKRLQGLLCN HIAVHRPSSQSDVNIQTVEQDLLDLTTRIPHLAGVLSALKSLFSSSSAYHSYIQEAEE ALREYNLFTDIPERIYSLSDFTYWSRTSEVIVKRVGITIQQLNVYHQLCRALMNGISR HLYGEDVEDIFVLGEKALDGEERMFVGSVFAAPNRIIDLITSLSIQAFEDNPVFNKLH …
85648	SNV	G	A	0.0397373	5	13	38.4615	1	17	5.88235		No	UL56	HHV5wtgp061	involved in DNA encapsidation	DNA packaging terminase subunit 2	AAR31621.1	GI:39842077	MEMNLLQKLCVVCSKCNEYAMELECLKYCDPNVLLAESTPFKRN AAAIVYLYRKIYPEVVAQNRTQSSLLTLYLEMLLKALHEDTALLDRALMAYSRQPDRA AFYRTVLRLDRCDRHHTVELQFTDNVRFSVSLATLNDIERFLCKMNYVYGILAPEAGL EVCAQLLELLRRLCGISPVARQEVYVEGTTCAQCYEELTIIPNQGRSLNKRLQGLLCN HIAVHRPSSQSDVNIQTVEQDLLDLTTRIPHLAGVLSALKSLFSSSSAYHSYIQEAEE ALREYNLFTDIPERIYSLSDFTYWSRTSEVIVKRVGITIQQLNVYHQLCRALMNGISR HLYGEDVEDIFVLGEKALDGEERMFVGSVFAAPNRIIDLITSLSIQAFEDNPVFNKLH …
85892..85893	MNV	AG	CA	0.0178911	7	13	53.8462	2	17	11.7647	AAR31621.1:p.Ala471Val	Yes	UL56	HHV5wtgp061	involved in DNA encapsidation	DNA packaging terminase subunit 2	AAR31621.1	GI:39842077	MEMNLLQKLCVVCSKCNEYAMELECLKYCDPNVLLAESTPFKRN AAAIVYLYRKIYPEVVAQNRTQSSLLTLYLEMLLKALHEDTALLDRALMAYSRQPDRA AFYRTVLRLDRCDRHHTVELQFTDNVRFSVSLATLNDIERFLCKMNYVYGILAPEAGL EVCAQLLELLRRLCGISPVARQEVYVEGTTCAQCYEELTIIPNQGRSLNKRLQGLLCN HIAVHRPSSQSDVNIQTVEQDLLDLTTRIPHLAGVLSALKSLFSSSSAYHSYIQEAEE ALREYNLFTDIPERIYSLSDFTYWSRTSEVIVKRVGITIQQLNVYHQLCRALMNGISR HLYGEDVEDIFVLGEKALDGEERMFVGSVFAAPNRIIDLITSLSIQAFEDNPVFNKLH …
88429	SNV	G	A	0.0450775	6	13	46.1538	2	17	11.7647		No	UL57	HHV5wtgp062	contains zinc-finger; involved in DNA replication; possibly involved in gene regulation	single-stranded DNA-binding protein	AAR31622.1	GI:39842078	MSHEELTALAPVGPAAFLYFSRLNAETQEILATLSLCDRSSSVV IAPLLAGLTVEADFGVSVRTPVLCYDGGVLTKVTSFCPFALYFHHTQGIVAFTEDHGD VHRLCEDARQKYALEAYTPEADRVPTDLAALCAAVGCQASETTVHVVVGNGLKEFLFA GQLIPCVEEATTVRLHGGEAVRVPLYPPTLFNSLQLDAEADEVSLDARSAFVEARGLY VPAVSETLFYYVYTSWCQSLRFSEPRVLIEAALRQFVHDSQQSVKLAPHKRYLGYMSQ RLSSLEKDHLMLSDAVVCELAFSFASVFFDSAYQPAESMLFSEWPLVTNATDHRDLIR ALTELKLHLSTHVAALVFSANSVLYQHRLVYLQSSARHPSAGGTASQETLLKAIQFTN …
89068	SNV	A	G	0.0450775	7	13	53.8462	3	17	17.6471		No	UL57	HHV5wtgp062	contains zinc-finger; involved in DNA replication; possibly involved in gene regulation	single-stranded DNA-binding protein	AAR31622.1	GI:39842078	MSHEELTALAPVGPAAFLYFSRLNAETQEILATLSLCDRSSSVV IAPLLAGLTVEADFGVSVRTPVLCYDGGVLTKVTSFCPFALYFHHTQGIVAFTEDHGD VHRLCEDARQKYALEAYTPEADRVPTDLAALCAAVGCQASETTVHVVVGNGLKEFLFA GQLIPCVEEATTVRLHGGEAVRVPLYPPTLFNSLQLDAEADEVSLDARSAFVEARGLY VPAVSETLFYYVYTSWCQSLRFSEPRVLIEAALRQFVHDSQQSVKLAPHKRYLGYMSQ RLSSLEKDHLMLSDAVVCELAFSFASVFFDSAYQPAESMLFSEWPLVTNATDHRDLIR ALTELKLHLSTHVAALVFSANSVLYQHRLVYLQSSARHPSAGGTASQETLLKAIQFTN …
89128	SNV	A	G	0.0450775	7	13	53.8462	3	17	17.6471		No	UL57	HHV5wtgp062	contains zinc-finger; involved in DNA replication; possibly involved in gene regulation	single-stranded DNA-binding protein	AAR31622.1	GI:39842078	MSHEELTALAPVGPAAFLYFSRLNAETQEILATLSLCDRSSSVV IAPLLAGLTVEADFGVSVRTPVLCYDGGVLTKVTSFCPFALYFHHTQGIVAFTEDHGD VHRLCEDARQKYALEAYTPEADRVPTDLAALCAAVGCQASETTVHVVVGNGLKEFLFA GQLIPCVEEATTVRLHGGEAVRVPLYPPTLFNSLQLDAEADEVSLDARSAFVEARGLY VPAVSETLFYYVYTSWCQSLRFSEPRVLIEAALRQFVHDSQQSVKLAPHKRYLGYMSQ RLSSLEKDHLMLSDAVVCELAFSFASVFFDSAYQPAESMLFSEWPLVTNATDHRDLIR ALTELKLHLSTHVAALVFSANSVLYQHRLVYLQSSARHPSAGGTASQETLLKAIQFTN …
89908	SNV	C	T	0.0126638	10	13	76.9231	5	17	29.4118		No	UL57	HHV5wtgp062	contains zinc-finger; involved in DNA replication; possibly involved in gene regulation	single-stranded DNA-binding protein	AAR31622.1	GI:39842078	MSHEELTALAPVGPAAFLYFSRLNAETQEILATLSLCDRSSSVV IAPLLAGLTVEADFGVSVRTPVLCYDGGVLTKVTSFCPFALYFHHTQGIVAFTEDHGD VHRLCEDARQKYALEAYTPEADRVPTDLAALCAAVGCQASETTVHVVVGNGLKEFLFA GQLIPCVEEATTVRLHGGEAVRVPLYPPTLFNSLQLDAEADEVSLDARSAFVEARGLY VPAVSETLFYYVYTSWCQSLRFSEPRVLIEAALRQFVHDSQQSVKLAPHKRYLGYMSQ RLSSLEKDHLMLSDAVVCELAFSFASVFFDSAYQPAESMLFSEWPLVTNATDHRDLIR ALTELKLHLSTHVAALVFSANSVLYQHRLVYLQSSARHPSAGGTASQETLLKAIQFTN …
90343	SNV	T	C	0.0415003	8	13	61.5385	4	17	23.5294		No	UL57	HHV5wtgp062	contains zinc-finger; involved in DNA replication; possibly involved in gene regulation	single-stranded DNA-binding protein	AAR31622.1	GI:39842078	MSHEELTALAPVGPAAFLYFSRLNAETQEILATLSLCDRSSSVV IAPLLAGLTVEADFGVSVRTPVLCYDGGVLTKVTSFCPFALYFHHTQGIVAFTEDHGD VHRLCEDARQKYALEAYTPEADRVPTDLAALCAAVGCQASETTVHVVVGNGLKEFLFA GQLIPCVEEATTVRLHGGEAVRVPLYPPTLFNSLQLDAEADEVSLDARSAFVEARGLY VPAVSETLFYYVYTSWCQSLRFSEPRVLIEAALRQFVHDSQQSVKLAPHKRYLGYMSQ RLSSLEKDHLMLSDAVVCELAFSFASVFFDSAYQPAESMLFSEWPLVTNATDHRDLIR ALTELKLHLSTHVAALVFSANSVLYQHRLVYLQSSARHPSAGGTASQETLLKAIQFTN …
91132	SNV	C	T	0.0450775	6	13	46.1538	2	17	11.7647		No	UL57	HHV5wtgp062	contains zinc-finger; involved in DNA replication; possibly involved in gene regulation	single-stranded DNA-binding protein	AAR31622.1	GI:39842078	MSHEELTALAPVGPAAFLYFSRLNAETQEILATLSLCDRSSSVV IAPLLAGLTVEADFGVSVRTPVLCYDGGVLTKVTSFCPFALYFHHTQGIVAFTEDHGD VHRLCEDARQKYALEAYTPEADRVPTDLAALCAAVGCQASETTVHVVVGNGLKEFLFA GQLIPCVEEATTVRLHGGEAVRVPLYPPTLFNSLQLDAEADEVSLDARSAFVEARGLY VPAVSETLFYYVYTSWCQSLRFSEPRVLIEAALRQFVHDSQQSVKLAPHKRYLGYMSQ RLSSLEKDHLMLSDAVVCELAFSFASVFFDSAYQPAESMLFSEWPLVTNATDHRDLIR ALTELKLHLSTHVAALVFSANSVLYQHRLVYLQSSARHPSAGGTASQETLLKAIQFTN …
92327	SNV	G	A	0.0151724	6	13	46.1538	1	17	5.88235		-
92620	SNV	G	A	0.0151724	6	13	46.1538	1	17	5.88235		-
93356	Deletion	G	-	0.0397373	5	13	38.4615	1	17	5.88235		-
95126	SNV	C	T	0.0450775	7	13	53.8462	3	17	17.6471		-
95131	SNV	A	G	0.0450775	7	13	53.8462	3	17	17.6471		-
95139	SNV	C	T	0.0450775	7	13	53.8462	3	17	17.6471		-
95182	SNV	T	C	0.0450775	7	13	53.8462	3	17	17.6471		-
95231..95232	Deletion	AA	-	0.0450775	7	13	53.8462	3	17	17.6471		-
95258	SNV	C	T	0.0178911	8	13	61.5385	3	17	17.6471		-
95483	SNV	G	T	0.00608643	9	13	69.2308	3	17	17.6471		-
95525	SNV	C	T	0.00608643	9	13	69.2308	3	17	17.6471		-
95599	SNV	C	T	0.0397373	5	13	38.4615	1	17	5.88235		-
96211	SNV	C	T	0.0260901	4	13	30.7692	0	17	0		-
98903	SNV	T	C	0.0397373	5	13	38.4615	1	17	5.88235		-
98905	SNV	T	C	0.0397373	5	13	38.4615	1	17	5.88235		-
98907	SNV	T	A	0.0397373	5	13	38.4615	1	17	5.88235		-
98910	Deletion	A	-	0.0397373	5	13	38.4615	1	17	5.88235		-
99616..99618	Deletion	GGC	-	0.0450775	6	13	46.1538	2	17	11.7647	AAR31623.1:p.Pro713del	Yes	UL69	HHV5wtgp063	RNA-binding protein; shuttles between nucleus and cytoplasm; inhibits pre-mRNA splicing; exports virus mRNA from nucleus; exerts most effects post-transcriptionally; involved in gene regulation; involved in RNA metabolism and transport	multifunctional expression regulator	AAR31623.1	GI:39842079	MELHSRGRHDAPSLSSLSERERRARRARRFCLDYEPVPRKFRRE RSPTSPSTRNGAAASEYHLAEDTVGAASHHHRPCVPARRPRYSKDDDTEGDPDHYPPP LPPSSRHALGGTGGHIIMGTAGFRGGHRASSSFKRRVAASASVPLNPHYGKSYDNDDG EPHHHGGDSTHLRRRVPSCPTTFGSSHPSSANNHHGSSAGPQQQQMLALIDDELDAMD EDELQQLSRLIEKKKRARLQRGAASSGTSPSSTSPVYDLQRYTAESLRLAPYPADLKV PTAFPQDHQPRGRILLSHDELMHTDYLLHIRQQFDWLEEPLLRKLVVEKIFAVYNAPN LHTLLAIIDETLSYMKYHHLHGLPVNPHDPYLETVGGMRQLLFNKLNNLDLGCILDHQ …
99634..99636	Deletion	TGT	-	0.0178911	7	13	53.8462	2	17	11.7647	AAR31623.1:p.Gln707del	Yes	UL69	HHV5wtgp063	RNA-binding protein; shuttles between nucleus and cytoplasm; inhibits pre-mRNA splicing; exports virus mRNA from nucleus; exerts most effects post-transcriptionally; involved in gene regulation; involved in RNA metabolism and transport	multifunctional expression regulator	AAR31623.1	GI:39842079	MELHSRGRHDAPSLSSLSERERRARRARRFCLDYEPVPRKFRRE RSPTSPSTRNGAAASEYHLAEDTVGAASHHHRPCVPARRPRYSKDDDTEGDPDHYPPP LPPSSRHALGGTGGHIIMGTAGFRGGHRASSSFKRRVAASASVPLNPHYGKSYDNDDG EPHHHGGDSTHLRRRVPSCPTTFGSSHPSSANNHHGSSAGPQQQQMLALIDDELDAMD EDELQQLSRLIEKKKRARLQRGAASSGTSPSSTSPVYDLQRYTAESLRLAPYPADLKV PTAFPQDHQPRGRILLSHDELMHTDYLLHIRQQFDWLEEPLLRKLVVEKIFAVYNAPN LHTLLAIIDETLSYMKYHHLHGLPVNPHDPYLETVGGMRQLLFNKLNNLDLGCILDHQ …
102462	SNV	A	G	0.0450775	7	13	53.8462	3	17	17.6471		No	UL70	HHV5wtgp064	involved in DNA replication	helicase-primase primase subunit	AAR31624.1	GI:39842080	MTLVLFATEYDSAHIVANVLSQTPTDHCVFPLLVKHQVSRRVYF CLQTQKCSDSRRVAPVFAVNNETLQLSRYLAARQPIPLSALIASLDEAETRPLYRHLF RTPVLSPEHGGEVREFKHLVYFHHAAVLRHLNQVFLCPTSPSWFISVFGHTEGQVLLT MAYYLFEGQYSTISTVEEYVRSFCTRDLGTIIPTHASMGEFARLLLGSPFRQRVSAFV AYAVARNRRDYTELEQVDTQINAFRERARLPDTVCVHYVYLAYRTALARARLLEYRRV VAYDADAAPEAQCTREPGFLGRRLSTELLDVMQKYFSLDNFLHDYVETHLLRLDESPH SATSPHGLGLAGYGGRIDGTHLAGFFGTSTQLARQLERINTLSESVFSPLERSLSGLL …
103590	SNV	C	T	0.0415003	8	13	61.5385	4	17	23.5294		No	UL70	HHV5wtgp064	involved in DNA replication	helicase-primase primase subunit	AAR31624.1	GI:39842080	MTLVLFATEYDSAHIVANVLSQTPTDHCVFPLLVKHQVSRRVYF CLQTQKCSDSRRVAPVFAVNNETLQLSRYLAARQPIPLSALIASLDEAETRPLYRHLF RTPVLSPEHGGEVREFKHLVYFHHAAVLRHLNQVFLCPTSPSWFISVFGHTEGQVLLT MAYYLFEGQYSTISTVEEYVRSFCTRDLGTIIPTHASMGEFARLLLGSPFRQRVSAFV AYAVARNRRDYTELEQVDTQINAFRERARLPDTVCVHYVYLAYRTALARARLLEYRRV VAYDADAAPEAQCTREPGFLGRRLSTELLDVMQKYFSLDNFLHDYVETHLLRLDESPH SATSPHGLGLAGYGGRIDGTHLAGFFGTSTQLARQLERINTLSESVFSPLERSLSGLL …
103821	SNV	A	G	0.0473497	12	13	92.3077	10	17	58.8235		No	UL70	HHV5wtgp064	involved in DNA replication	helicase-primase primase subunit	AAR31624.1	GI:39842080	MTLVLFATEYDSAHIVANVLSQTPTDHCVFPLLVKHQVSRRVYF CLQTQKCSDSRRVAPVFAVNNETLQLSRYLAARQPIPLSALIASLDEAETRPLYRHLF RTPVLSPEHGGEVREFKHLVYFHHAAVLRHLNQVFLCPTSPSWFISVFGHTEGQVLLT MAYYLFEGQYSTISTVEEYVRSFCTRDLGTIIPTHASMGEFARLLLGSPFRQRVSAFV AYAVARNRRDYTELEQVDTQINAFRERARLPDTVCVHYVYLAYRTALARARLLEYRRV VAYDADAAPEAQCTREPGFLGRRLSTELLDVMQKYFSLDNFLHDYVETHLLRLDESPH SATSPHGLGLAGYGGRIDGTHLAGFFGTSTQLARQLERINTLSESVFSPLERSLSGLL …
104559	SNV	A	G	0.0415003	8	13	61.5385	4	17	23.5294		No	UL70	HHV5wtgp064	involved in DNA replication	helicase-primase primase subunit	AAR31624.1	GI:39842080	MTLVLFATEYDSAHIVANVLSQTPTDHCVFPLLVKHQVSRRVYF CLQTQKCSDSRRVAPVFAVNNETLQLSRYLAARQPIPLSALIASLDEAETRPLYRHLF RTPVLSPEHGGEVREFKHLVYFHHAAVLRHLNQVFLCPTSPSWFISVFGHTEGQVLLT MAYYLFEGQYSTISTVEEYVRSFCTRDLGTIIPTHASMGEFARLLLGSPFRQRVSAFV AYAVARNRRDYTELEQVDTQINAFRERARLPDTVCVHYVYLAYRTALARARLLEYRRV VAYDADAAPEAQCTREPGFLGRRLSTELLDVMQKYFSLDNFLHDYVETHLLRLDESPH SATSPHGLGLAGYGGRIDGTHLAGFFGTSTQLARQLERINTLSESVFSPLERSLSGLL …
105239	SNV	A	G	0.0415003	8	13	61.5385	4	17	23.5294		No	UL71	HHV5wtgp065	involved in virion morphogenesis	tegument protein UL51	AAR31724.1	GI:39842180	MQLAQRLCELLMCRRKAAPVADYVLLQPSEDVELRELQAFLDEN FKQLEITPADLRTFSRDTDVVNHLLKLLPLYRQCQSKCAFLKGYLSEGCLPHTRPAAE VECKKSQRILEALDILILKLVVGEFAMSEADSLEMLLDKFSTDQASLVEVQRVMGLVD MDCEKSAYMLEAGAAATVAPPTPPAVVQGESGVREDGETVAAVSAFACSSVSDSLIPE ETGVTRPMMSLAHINTVSCPTVMRFDQRLLEEGDEEDEVTVMSPSPEPVQQQPPVEPV QQQPQGRGSHRRRYKESAPQETLPTNHEREILDLMRHSPDVPREAVMSPTMVTIPPPQ IPFVGSARELRGVKKKKPTAAALLSSA
107274	SNV	G	A	0.0415003	8	13	61.5385	4	17	23.5294	AAR31725.1:p.Arg75Lys	Yes	UL73	HHV5wtgp067	type 1 membrane protein; complexed with envelope glycoprotein M; involved in virion morphogenesis; involved in membrane fusion	envelope glycoprotein N	AAR31725.1	GI:39842181	MEWNTLVLGLLVLSVVASSNNTSTASTPRPSSSTHASTTVKATT VATTSTTTATSTSSTTSAKPGSTTHDPNVMRPHAHNDFYNAHCTSHMYELSLSSFAAW WTMLNALILMGAFCIVLRHCCFQNFTATTTKGY
107305	SNV	G	A	0.01947	11	13	84.6154	7	17	41.1765		No	UL73	HHV5wtgp067	type 1 membrane protein; complexed with envelope glycoprotein M; involved in virion morphogenesis; involved in membrane fusion	envelope glycoprotein N	AAR31725.1	GI:39842181	MEWNTLVLGLLVLSVVASSNNTSTASTPRPSSSTHASTTVKATT VATTSTTTATSTSSTTSAKPGSTTHDPNVMRPHAHNDFYNAHCTSHMYELSLSSFAAW WTMLNALILMGAFCIVLRHCCFQNFTATTTKGY
107457	SNV	G	A	0.0354823	9	13	69.2308	5	17	29.4118		No	UL73, UL74	HHV5wtgp067, HHV5wtgp068	type 1 membrane protein; complexed with envelope glycoprotein M; involved in virion morphogenesis; involved in membrane fusion, contains signal peptide; associated with envelope glycoprotein H and envelope glycoprotein L; involved in virion morphogenesis	envelope glycoprotein N, envelope glycoprotein O	AAR31725.1, AAR31626.1	GI:39842181, GI:39842082	MEWNTLVLGLLVLSVVASSNNTSTASTPRPSSSTHASTTVKATT VATTSTTTATSTSSTTSAKPGSTTHDPNVMRPHAHNDFYNAHCTSHMYELSLSSFAAW WTMLNALILMGAFCIVLRHCCFQNFTATTTKGY, MGKKEMIMVKGIPKIMLLISITFLLLSLINCNVLVNSRGTRRSW PYTVLSYRGKEILKKQKEDILKRLMSTSSDGYRFLMYPSQQKFHAIVISMDKFPQDYI LAGPIRNDSITHMWFDFYSTQLRKPAKYVYSEYNHTAHKITLRPPPCGTVPSMNCLSE MLNVSKRNDTGEKGCGNFTTFNPMFFNVPRWNTKLYIGSNKVNVDSQTIYFLGLTALL LRYAQRNCTRSFYLVNAMSRNLFRVPKYINGTKLKNTM…
107478	SNV	C	T	0.0415003	8	13	61.5385	4	17	23.5294		No	UL74	HHV5wtgp068	contains signal peptide; associated with envelope glycoprotein H and envelope glycoprotein L; involved in virion morphogenesis	envelope glycoprotein O	AAR31626.1	GI:39842082	MGKKEMIMVKGIPKIMLLISITFLLLSLINCNVLVNSRGTRRSW PYTVLSYRGKEILKKQKEDILKRLMSTSSDGYRFLMYPSQQKFHAIVISMDKFPQDYI LAGPIRNDSITHMWFDFYSTQLRKPAKYVYSEYNHTAHKITLRPPPCGTVPSMNCLSE MLNVSKRNDTGEKGCGNFTTFNPMFFNVPRWNTKLYIGSNKVNVDSQTIYFLGLTALL LRYAQRNCTRSFYLVNAMSRNLFRVPKYINGTKLKNTMRKLKRKQALVKEQPQKKNKK SQSTTTPYLSYTTSTAFNVTTNVTYSATAAVTRVATSTTGYRPDSNFMKSIMATQLRD LATWVYTTLRYRNEPFCKPDRNRTAVSEFMKNTHVLIRNETPYTIYGTLDMSSLYYNE …
111382	SNV	C	T	0.0450775	7	13	53.8462	3	17	17.6471	AAR31627.1:p.Arg24Gln	Yes	UL75	HHV5wtgp069	type 1 membrane protein; possible membrane fusogen; complexed with envelope glycoprotein L; involved in cell entry; involved in cell-to-cell spread	envelope glycoprotein H	AAR31627.1	GI:39842083	MRPGLPSYLIILAVCLFSHLLSSRYGAEAVSEPLDKAFHLLLNT YGRPIRFLRENTTQCTYNSSLRNSTVVRENAISFNFFQSYNQYYVFHMPRCLFAGPLA EQFLNQVDLTETLERYQQRLNTYALVSKDLASYRSFSQQLKAQDSLGEQPTTVPPPID LSIPHVWMPPQTTPHGWTESHTTSGLHRPHFNQTCILFDGHDLLFSTVTPCLHQGFYL IDELRYVKITLTEDFFVVTVSIDDDTPMLLIFGHLPRVLFKAPYQRDNFILRQTEKHE LLVLVKKDQLNRHSYLKDPDFLDAALDFNYLDLSALLRNSFHRYAVDVLKSGRCQMLD RRTVEMAFAYALALFAAARQEEAGAQVSVPRALDRQAALLQIQEFMITCLSQTPPRTT …
111727	SNV	T	C	0.0178911	7	13	53.8462	2	17	11.7647		No	UL76	HHV5wtgp070		nuclear protein UL24	AAR31628.1	GI:39842084	MPSGCGDDADSTGNALRRLPHVRKRIGKRKHLDIYRRLLRVFPS FVALNRLLGGLFPPELQKYRRRLFIEVRLSRRIPDCVLVFLPPDSGSRGIVYCYVIEF KTTYSDADDQSVRWHATHSLQYAEGLRQLKGALVDFDFLRLPRGGGQVWSVVPSLVFF QQKADRPSFYRAFRSGRFDLCTDSVLDYLGRRQDESVAHLLAATRRRLLRAARGKRAA LPRARASAVAGGRGGGNARRGLARGRAHGPGAQTVSASGAEGSGSQGTDLLRGSRRAR VRGGGAVEPAVRARRRTVAADAATTTVSSAFVVPRDRRGRSFRRPTRSL
111797	SNV	C	T	0.0178911	7	13	53.8462	2	17	11.7647		No	UL76	HHV5wtgp070		nuclear protein UL24	AAR31628.1	GI:39842084	MPSGCGDDADSTGNALRRLPHVRKRIGKRKHLDIYRRLLRVFPS FVALNRLLGGLFPPELQKYRRRLFIEVRLSRRIPDCVLVFLPPDSGSRGIVYCYVIEF KTTYSDADDQSVRWHATHSLQYAEGLRQLKGALVDFDFLRLPRGGGQVWSVVPSLVFF QQKADRPSFYRAFRSGRFDLCTDSVLDYLGRRQDESVAHLLAATRRRLLRAARGKRAA LPRARASAVAGGRGGGNARRGLARGRAHGPGAQTVSASGAEGSGSQGTDLLRGSRRAR VRGGGAVEPAVRARRRTVAADAATTTVSSAFVVPRDRRGRSFRRPTRSL
111826	SNV	G	A	0.0450775	7	13	53.8462	3	17	17.6471		No	UL76	HHV5wtgp070		nuclear protein UL24	AAR31628.1	GI:39842084	MPSGCGDDADSTGNALRRLPHVRKRIGKRKHLDIYRRLLRVFPS FVALNRLLGGLFPPELQKYRRRLFIEVRLSRRIPDCVLVFLPPDSGSRGIVYCYVIEF KTTYSDADDQSVRWHATHSLQYAEGLRQLKGALVDFDFLRLPRGGGQVWSVVPSLVFF QQKADRPSFYRAFRSGRFDLCTDSVLDYLGRRQDESVAHLLAATRRRLLRAARGKRAA LPRARASAVAGGRGGGNARRGLARGRAHGPGAQTVSASGAEGSGSQGTDLLRGSRRAR VRGGGAVEPAVRARRRTVAADAATTTVSSAFVVPRDRRGRSFRRPTRSL
113030	SNV	C	A	0.0415003	8	13	61.5385	4	17	23.5294		No	UL77	HHV5wtgp071	located on capsid near vertices; possibly stabilizes the capsid and retains the genome; involved in DNA encapsidation	DNA packaging tegument protein UL25	AAR31629.1	GI:39842085	MSLLHTFWRLPVAVFFEPHEENVLRCPERVLRRLLEDAAVAMRG GGWREDVLMDRVRKRYLRQELRDLGHRVQTYCEDLEGRVSEAEALLNQQCELDEGPSP RTLLQPPCRPRSSSPGTGVAGASAVPHGLYSRHDAITGPVAAPSDAVAASAAAGASST WLAQCAEQPLPGNVPNYFGITQNDPFIRFHTDFRGEVVNTMFENASTWTFSFGIWYYR LKRGLYTQPRWKRVYHLAQMDNFSISQELLLGVVNALENVTVYPTYDCVLSDLEAAAC LLVAYGHALWEGRDPPDSVTAVLSELPQLLPRLADDVSREIAAWEGPVAAGNNYYAYR DSPDLRYYMPLSGGRHYHPGTFDRHVLVRLFHKRGVLQHLPGYGTITEELVQERLSGQ …
113051	SNV	C	T	0.0415003	8	13	61.5385	4	17	23.5294		No	UL77	HHV5wtgp071	located on capsid near vertices; possibly stabilizes the capsid and retains the genome; involved in DNA encapsidation	DNA packaging tegument protein UL25	AAR31629.1	GI:39842085	MSLLHTFWRLPVAVFFEPHEENVLRCPERVLRRLLEDAAVAMRG GGWREDVLMDRVRKRYLRQELRDLGHRVQTYCEDLEGRVSEAEALLNQQCELDEGPSP RTLLQPPCRPRSSSPGTGVAGASAVPHGLYSRHDAITGPVAAPSDAVAASAAAGASST WLAQCAEQPLPGNVPNYFGITQNDPFIRFHTDFRGEVVNTMFENASTWTFSFGIWYYR LKRGLYTQPRWKRVYHLAQMDNFSISQELLLGVVNALENVTVYPTYDCVLSDLEAAAC LLVAYGHALWEGRDPPDSVTAVLSELPQLLPRLADDVSREIAAWEGPVAAGNNYYAYR DSPDLRYYMPLSGGRHYHPGTFDRHVLVRLFHKRGVLQHLPGYGTITEELVQERLSGQ …
113060	SNV	A	G	0.0434227	13	13	100	12	17	70.5882		No	UL77	HHV5wtgp071	located on capsid near vertices; possibly stabilizes the capsid and retains the genome; involved in DNA encapsidation	DNA packaging tegument protein UL25	AAR31629.1	GI:39842085	MSLLHTFWRLPVAVFFEPHEENVLRCPERVLRRLLEDAAVAMRG GGWREDVLMDRVRKRYLRQELRDLGHRVQTYCEDLEGRVSEAEALLNQQCELDEGPSP RTLLQPPCRPRSSSPGTGVAGASAVPHGLYSRHDAITGPVAAPSDAVAASAAAGASST WLAQCAEQPLPGNVPNYFGITQNDPFIRFHTDFRGEVVNTMFENASTWTFSFGIWYYR LKRGLYTQPRWKRVYHLAQMDNFSISQELLLGVVNALENVTVYPTYDCVLSDLEAAAC LLVAYGHALWEGRDPPDSVTAVLSELPQLLPRLADDVSREIAAWEGPVAAGNNYYAYR DSPDLRYYMPLSGGRHYHPGTFDRHVLVRLFHKRGVLQHLPGYGTITEELVQERLSGQ …
113532	SNV	T	C	0.0237881	12	13	92.3077	9	17	52.9412		No	UL77	HHV5wtgp071	located on capsid near vertices; possibly stabilizes the capsid and retains the genome; involved in DNA encapsidation	DNA packaging tegument protein UL25	AAR31629.1	GI:39842085	MSLLHTFWRLPVAVFFEPHEENVLRCPERVLRRLLEDAAVAMRG GGWREDVLMDRVRKRYLRQELRDLGHRVQTYCEDLEGRVSEAEALLNQQCELDEGPSP RTLLQPPCRPRSSSPGTGVAGASAVPHGLYSRHDAITGPVAAPSDAVAASAAAGASST WLAQCAEQPLPGNVPNYFGITQNDPFIRFHTDFRGEVVNTMFENASTWTFSFGIWYYR LKRGLYTQPRWKRVYHLAQMDNFSISQELLLGVVNALENVTVYPTYDCVLSDLEAAAC LLVAYGHALWEGRDPPDSVTAVLSELPQLLPRLADDVSREIAAWEGPVAAGNNYYAYR DSPDLRYYMPLSGGRHYHPGTFDRHVLVRLFHKRGVLQHLPGYGTITEELVQERLSGQ …
113900	SNV	C	T	0.0415003	8	13	61.5385	4	17	23.5294		No	UL77	HHV5wtgp071	located on capsid near vertices; possibly stabilizes the capsid and retains the genome; involved in DNA encapsidation	DNA packaging tegument protein UL25	AAR31629.1	GI:39842085	MSLLHTFWRLPVAVFFEPHEENVLRCPERVLRRLLEDAAVAMRG GGWREDVLMDRVRKRYLRQELRDLGHRVQTYCEDLEGRVSEAEALLNQQCELDEGPSP RTLLQPPCRPRSSSPGTGVAGASAVPHGLYSRHDAITGPVAAPSDAVAASAAAGASST WLAQCAEQPLPGNVPNYFGITQNDPFIRFHTDFRGEVVNTMFENASTWTFSFGIWYYR LKRGLYTQPRWKRVYHLAQMDNFSISQELLLGVVNALENVTVYPTYDCVLSDLEAAAC LLVAYGHALWEGRDPPDSVTAVLSELPQLLPRLADDVSREIAAWEGPVAAGNNYYAYR DSPDLRYYMPLSGGRHYHPGTFDRHVLVRLFHKRGVLQHLPGYGTITEELVQERLSGQ …
115029	SNV	C	A	0.0450775	7	13	53.8462	3	17	17.6471		No	UL78	HHV5wtgp072	type 3 membrane protein; 7 transmembrane domains; putative chemokine receptor; possibly involved in intracellular signalling; GPCR family	envelope protein UL78	AAR31630.1	GI:39842086	MSPSVEETTSVTESIMFAIVSFKHMGPFEGYSMSADRAASDLLI GMFGSVSLVNLLTIIGCLWVLRVTRPPVSVMIFTWNLVLSQFFSILATMLSKGIMLRG ALNLSLCRLVLFVDDVGLYSTALFFLFLILDRLSAISYGRDLWHHETRENAGVALYAV AFAWVLSIVAAVPTAATGSLDYRWLGCQIPIQYAAVDLTIKMWFLLGAPMIAVLANVV ELAYSDRRDHVWSYVGRVCTFYVTCLMLFVPYYCFRVLRGVLQPASAAGTGFGIMDYV ELATRTLLTMRLGILPLFIIAFFSREPTKDLDDSFDYLVERCQQSCHGHFVRRLVQAL KRAMYSVELAVCYFSTSVRDVAEAVKKSSSRCYADATSAAVVVTTTTSEKATLVEHAE …
117482	SNV	C	T	0.0415003	8	13	61.5385	4	17	23.5294	AAR31632.1:p.Ser328Leu	Yes	UL80	HHV5wtgp074	serine protease (N-terminal region); minor scaffold protein (remainder of protein, clipped near C terminus); involved in capsid morphogenesis	capsid maturation protease	AAR31632.1	GI:39842088	MTMDEQQSQAVAPVYVGGFLARYDQSPDEAELLLPRDVVEHWLH AQGQGQPSLSVALPLNINHDDTAVVGHVAAMQSVRDGLFCLGCVTSPRFLEIVRRASE KSELVSRGPVSPLQPDKVVEFLSGSYAGLSLSSRRCDDVEAATSLSGSETTPFKHVAL CSVGRRRGTLAVYGRDPEWVTQRFPDLTAADRDGLRAQWQRCGSTAVDASGDPFRSDS YGLLGNSVDALYIRERLPKLRYDKQLVGVTERESYVKASVSPEAACVIKAASAERSGD SRSQAATPAAGARVPSSSPSPPVEPPSPVQPPALPASPSVLPAESPPSLSPSEPAEAA SMSHPLSAAVPAATAPPGATVAGASPAVSSLAWPHDGVYLPKDAFFSLLGASRSAAPV …
118284..118285	MNV	CT	TG	0.0178911	8	13	61.5385	3	17	17.6471	AAR31632.1:p.Ser596Ala; AAR31633.1:p.Ser261Ala	Yes	UL80, UL80.5	HHV5wtgp074, HHV5wtgp075	serine protease (N-terminal region); minor scaffold protein (remainder of protein, clipped near C terminus); involved in capsid morphogenesis, clipped near C terminus; involved in capsid morphogenesis	capsid maturation protease, capsid scaffold protein	AAR31632.1, AAR31633.1	GI:39842088, GI:39842089	MTMDEQQSQAVAPVYVGGFLARYDQSPDEAELLLPRDVVEHWLH AQGQGQPSLSVALPLNINHDDTAVVGHVAAMQSVRDGLFCLGCVTSPRFLEIVRRASE KSELVSRGPVSPLQPDKVVEFLSGSYAGLSLSSRRCDDVEAATSLSGSETTPFKHVAL CSVGRRRGTLAVYGRDPEWVTQRFPDLTAADRDGLRAQWQRCGSTAVDASGDPFRSDS YGLLGNSVDALYIRERLPKLRYDKQLVGVTERESYVKASVSPEAACVIKAASAERSGD SRSQAATPAAGARVPSSSPSPPVEPPSPVQPPALPASPSVLPAESPPSLSPSEPAEAA SMSHPLSAAVPAATAPPGATVAGASPAVSSLAWPHDGVYLPKDAFFSLLGASRSAAPV …
118768	Deletion	A	-	0.0260901	4	13	30.7692	0	17	0		-
120585..120586	MNV	GC	CT	0.0450775	7	13	53.8462	3	17	17.6471		-
123513	SNV	A	G	0.0178911	8	13	61.5385	3	17	17.6471		No	UL84	HHV5wtgp078	involved in gene regulation; involved in DNA replication; DURP family	protein UL84	AAR31636.1	GI:39842092	MPRVDPNLRNRARRPRARRGGGGGVGSNSSRHSGKCRRQRRALS TPPLTFLATTTTTTMMGVASTDDDSLLLKTPDELDKHSGSPQTILTLTDKHDIRQPRV HRGTYHLIQLHLDLRPEELRDPFQILLSTPLQLGEANGESQTAPATSQEEETAASHEP EKKKEKEEKKEEEDEDDRNDDRERGILCVVSNEDSDVRPAFSLFPARPGCHILRSVID QQLTRMAIVRLSLNLFALRIITPLLKRLPLRRKAAHHTALHDCLALHLPELTFEPTLD INNVTENAASVADTAESTDADLTPTLTVRVRHALCWHRVEGGISGPRGLTSRISARLS ETTAKTLGPSVFGRLELDPNESPPDLTLSSLTLYQDGILRFNVTCDRTEAPADPVAFR …
123531	SNV	C	T	0.0397373	5	13	38.4615	1	17	5.88235		No	UL84	HHV5wtgp078	involved in gene regulation; involved in DNA replication; DURP family	protein UL84	AAR31636.1	GI:39842092	MPRVDPNLRNRARRPRARRGGGGGVGSNSSRHSGKCRRQRRALS TPPLTFLATTTTTTMMGVASTDDDSLLLKTPDELDKHSGSPQTILTLTDKHDIRQPRV HRGTYHLIQLHLDLRPEELRDPFQILLSTPLQLGEANGESQTAPATSQEEETAASHEP EKKKEKEEKKEEEDEDDRNDDRERGILCVVSNEDSDVRPAFSLFPARPGCHILRSVID QQLTRMAIVRLSLNLFALRIITPLLKRLPLRRKAAHHTALHDCLALHLPELTFEPTLD INNVTENAASVADTAESTDADLTPTLTVRVRHALCWHRVEGGISGPRGLTSRISARLS ETTAKTLGPSVFGRLELDPNESPPDLTLSSLTLYQDGILRFNVTCDRTEAPADPVAFR …
124291	SNV	C	T	0.0260901	4	13	30.7692	0	17	0	AAR31636.1:p.Ser29Asn	Yes	UL84	HHV5wtgp078	involved in gene regulation; involved in DNA replication; DURP family	protein UL84	AAR31636.1	GI:39842092	MPRVDPNLRNRARRPRARRGGGGGVGSNSSRHSGKCRRQRRALS TPPLTFLATTTTTTMMGVASTDDDSLLLKTPDELDKHSGSPQTILTLTDKHDIRQPRV HRGTYHLIQLHLDLRPEELRDPFQILLSTPLQLGEANGESQTAPATSQEEETAASHEP EKKKEKEEKKEEEDEDDRNDDRERGILCVVSNEDSDVRPAFSLFPARPGCHILRSVID QQLTRMAIVRLSLNLFALRIITPLLKRLPLRRKAAHHTALHDCLALHLPELTFEPTLD INNVTENAASVADTAESTDADLTPTLTVRVRHALCWHRVEGGISGPRGLTSRISARLS ETTAKTLGPSVFGRLELDPNESPPDLTLSSLTLYQDGILRFNVTCDRTEAPADPVAFR …
124897	SNV	C	A	0.0450775	6	13	46.1538	2	17	11.7647		No	UL85	HHV5wtgp079	complexed 2:1 with capsid triplex subunit 1 to connect capsid hexons and pentons; involved in capsid morphogenesis	capsid triplex subunit 2	AAR31637.1	GI:39842093	MAAMEANIFCTFDHKLSIADVGKLTKLVAAVVPIPQRLHLIKHY QLGLHQFVDHTRGYVRLRGLLRNMTLTLMRRVEGNQILLHVPTHGLLYTVLNTGPVTW EKGDALCVLPPLFHGPLARENLLTLGQWELVLPWIVPMPLALEINQRLLIMGLFSLDR SYEEVKAAVQQLQTITFRDATFTIPDPVIDQHLLIDMKTACLSMSMVANLASELTMTY VRKLALEDSSMLLVKCQELLMRLDRERSVGEPRTPARPQHVSPDDEIARLSALFVMLR QLDDLIREQVVFTVCDVSPDNKSATCIFKG
125835	SNV	G	A	0.0450775	6	13	46.1538	2	17	11.7647		No	UL86	HHV5wtgp080	6 copies form hexons, 5 copies form pentons; involved in capsid morphogenesis	major capsid protein	AAR31638.1	GI:39842094	MENWSALELLPKVGIPTDFLTHVKTSAGEEMFEALRIYYGDDPE RYNIHFEAIFGTFCNRLEWVYFLTSGLAAAAHAIKFHDLNKLTTGKMLFHVQVPRVAS GAGLPTSRQTTIMVTKYSEKSPITIPFELSAACLTYLRETFEGTILDKILNVEAMHTV LRALKNTADAMERGLIHSFLQTLLRKAPPYFVVQTLVENATLARQALNRIQRSNILQS FKAKMLATLFLLNRTRDRDYVLKFLTRLAEAATDSILDNPTTYTTSSGAKISGVMVST ANVMQIIMSLLSSHITKETVSAPATYGNFVLSPENAVTAISYHSILADFNSYKAHLTS GQPHLPNDSLSQAGAHSLTPLSMDVIRLGEKTVIMENLRRVYKNTDTKDPLERNVDLT …
127032	SNV	C	T	0.0397373	5	13	38.4615	1	17	5.88235		No	UL86	HHV5wtgp080	6 copies form hexons, 5 copies form pentons; involved in capsid morphogenesis	major capsid protein	AAR31638.1	GI:39842094	MENWSALELLPKVGIPTDFLTHVKTSAGEEMFEALRIYYGDDPE RYNIHFEAIFGTFCNRLEWVYFLTSGLAAAAHAIKFHDLNKLTTGKMLFHVQVPRVAS GAGLPTSRQTTIMVTKYSEKSPITIPFELSAACLTYLRETFEGTILDKILNVEAMHTV LRALKNTADAMERGLIHSFLQTLLRKAPPYFVVQTLVENATLARQALNRIQRSNILQS FKAKMLATLFLLNRTRDRDYVLKFLTRLAEAATDSILDNPTTYTTSSGAKISGVMVST ANVMQIIMSLLSSHITKETVSAPATYGNFVLSPENAVTAISYHSILADFNSYKAHLTS GQPHLPNDSLSQAGAHSLTPLSMDVIRLGEKTVIMENLRRVYKNTDTKDPLERNVDLT …
127599	SNV	C	T	0.0178911	7	13	53.8462	2	17	11.7647		No	UL86	HHV5wtgp080	6 copies form hexons, 5 copies form pentons; involved in capsid morphogenesis	major capsid protein	AAR31638.1	GI:39842094	MENWSALELLPKVGIPTDFLTHVKTSAGEEMFEALRIYYGDDPE RYNIHFEAIFGTFCNRLEWVYFLTSGLAAAAHAIKFHDLNKLTTGKMLFHVQVPRVAS GAGLPTSRQTTIMVTKYSEKSPITIPFELSAACLTYLRETFEGTILDKILNVEAMHTV LRALKNTADAMERGLIHSFLQTLLRKAPPYFVVQTLVENATLARQALNRIQRSNILQS FKAKMLATLFLLNRTRDRDYVLKFLTRLAEAATDSILDNPTTYTTSSGAKISGVMVST ANVMQIIMSLLSSHITKETVSAPATYGNFVLSPENAVTAISYHSILADFNSYKAHLTS GQPHLPNDSLSQAGAHSLTPLSMDVIRLGEKTVIMENLRRVYKNTDTKDPLERNVDLT …
127872	SNV	C	T	0.0450775	6	13	46.1538	2	17	11.7647		No	UL86	HHV5wtgp080	6 copies form hexons, 5 copies form pentons; involved in capsid morphogenesis	major capsid protein	AAR31638.1	GI:39842094	MENWSALELLPKVGIPTDFLTHVKTSAGEEMFEALRIYYGDDPE RYNIHFEAIFGTFCNRLEWVYFLTSGLAAAAHAIKFHDLNKLTTGKMLFHVQVPRVAS GAGLPTSRQTTIMVTKYSEKSPITIPFELSAACLTYLRETFEGTILDKILNVEAMHTV LRALKNTADAMERGLIHSFLQTLLRKAPPYFVVQTLVENATLARQALNRIQRSNILQS FKAKMLATLFLLNRTRDRDYVLKFLTRLAEAATDSILDNPTTYTTSSGAKISGVMVST ANVMQIIMSLLSSHITKETVSAPATYGNFVLSPENAVTAISYHSILADFNSYKAHLTS GQPHLPNDSLSQAGAHSLTPLSMDVIRLGEKTVIMENLRRVYKNTDTKDPLERNVDLT …
128259	SNV	C	T	0.0450775	6	13	46.1538	2	17	11.7647		No	UL86	HHV5wtgp080	6 copies form hexons, 5 copies form pentons; involved in capsid morphogenesis	major capsid protein	AAR31638.1	GI:39842094	MENWSALELLPKVGIPTDFLTHVKTSAGEEMFEALRIYYGDDPE RYNIHFEAIFGTFCNRLEWVYFLTSGLAAAAHAIKFHDLNKLTTGKMLFHVQVPRVAS GAGLPTSRQTTIMVTKYSEKSPITIPFELSAACLTYLRETFEGTILDKILNVEAMHTV LRALKNTADAMERGLIHSFLQTLLRKAPPYFVVQTLVENATLARQALNRIQRSNILQS FKAKMLATLFLLNRTRDRDYVLKFLTRLAEAATDSILDNPTTYTTSSGAKISGVMVST ANVMQIIMSLLSSHITKETVSAPATYGNFVLSPENAVTAISYHSILADFNSYKAHLTS GQPHLPNDSLSQAGAHSLTPLSMDVIRLGEKTVIMENLRRVYKNTDTKDPLERNVDLT …
128391	SNV	A	G	0.0178911	7	13	53.8462	2	17	11.7647		No	UL86	HHV5wtgp080	6 copies form hexons, 5 copies form pentons; involved in capsid morphogenesis	major capsid protein	AAR31638.1	GI:39842094	MENWSALELLPKVGIPTDFLTHVKTSAGEEMFEALRIYYGDDPE RYNIHFEAIFGTFCNRLEWVYFLTSGLAAAAHAIKFHDLNKLTTGKMLFHVQVPRVAS GAGLPTSRQTTIMVTKYSEKSPITIPFELSAACLTYLRETFEGTILDKILNVEAMHTV LRALKNTADAMERGLIHSFLQTLLRKAPPYFVVQTLVENATLARQALNRIQRSNILQS FKAKMLATLFLLNRTRDRDYVLKFLTRLAEAATDSILDNPTTYTTSSGAKISGVMVST ANVMQIIMSLLSSHITKETVSAPATYGNFVLSPENAVTAISYHSILADFNSYKAHLTS GQPHLPNDSLSQAGAHSLTPLSMDVIRLGEKTVIMENLRRVYKNTDTKDPLERNVDLT …
128400	SNV	C	A	0.0450775	7	13	53.8462	3	17	17.6471		No	UL86	HHV5wtgp080	6 copies form hexons, 5 copies form pentons; involved in capsid morphogenesis	major capsid protein	AAR31638.1	GI:39842094	MENWSALELLPKVGIPTDFLTHVKTSAGEEMFEALRIYYGDDPE RYNIHFEAIFGTFCNRLEWVYFLTSGLAAAAHAIKFHDLNKLTTGKMLFHVQVPRVAS GAGLPTSRQTTIMVTKYSEKSPITIPFELSAACLTYLRETFEGTILDKILNVEAMHTV LRALKNTADAMERGLIHSFLQTLLRKAPPYFVVQTLVENATLARQALNRIQRSNILQS FKAKMLATLFLLNRTRDRDYVLKFLTRLAEAATDSILDNPTTYTTSSGAKISGVMVST ANVMQIIMSLLSSHITKETVSAPATYGNFVLSPENAVTAISYHSILADFNSYKAHLTS GQPHLPNDSLSQAGAHSLTPLSMDVIRLGEKTVIMENLRRVYKNTDTKDPLERNVDLT …
128427	SNV	C	A	0.0450775	7	13	53.8462	3	17	17.6471		No	UL86	HHV5wtgp080	6 copies form hexons, 5 copies form pentons; involved in capsid morphogenesis	major capsid protein	AAR31638.1	GI:39842094	MENWSALELLPKVGIPTDFLTHVKTSAGEEMFEALRIYYGDDPE RYNIHFEAIFGTFCNRLEWVYFLTSGLAAAAHAIKFHDLNKLTTGKMLFHVQVPRVAS GAGLPTSRQTTIMVTKYSEKSPITIPFELSAACLTYLRETFEGTILDKILNVEAMHTV LRALKNTADAMERGLIHSFLQTLLRKAPPYFVVQTLVENATLARQALNRIQRSNILQS FKAKMLATLFLLNRTRDRDYVLKFLTRLAEAATDSILDNPTTYTTSSGAKISGVMVST ANVMQIIMSLLSSHITKETVSAPATYGNFVLSPENAVTAISYHSILADFNSYKAHLTS GQPHLPNDSLSQAGAHSLTPLSMDVIRLGEKTVIMENLRRVYKNTDTKDPLERNVDLT …
128549	SNV	A	G	0.0354823	9	13	69.2308	5	17	29.4118		No	UL86	HHV5wtgp080	6 copies form hexons, 5 copies form pentons; involved in capsid morphogenesis	major capsid protein	AAR31638.1	GI:39842094	MENWSALELLPKVGIPTDFLTHVKTSAGEEMFEALRIYYGDDPE RYNIHFEAIFGTFCNRLEWVYFLTSGLAAAAHAIKFHDLNKLTTGKMLFHVQVPRVAS GAGLPTSRQTTIMVTKYSEKSPITIPFELSAACLTYLRETFEGTILDKILNVEAMHTV LRALKNTADAMERGLIHSFLQTLLRKAPPYFVVQTLVENATLARQALNRIQRSNILQS FKAKMLATLFLLNRTRDRDYVLKFLTRLAEAATDSILDNPTTYTTSSGAKISGVMVST ANVMQIIMSLLSSHITKETVSAPATYGNFVLSPENAVTAISYHSILADFNSYKAHLTS GQPHLPNDSLSQAGAHSLTPLSMDVIRLGEKTVIMENLRRVYKNTDTKDPLERNVDLT …
128820	SNV	G	A	0.0415003	8	13	61.5385	4	17	23.5294		No	UL86	HHV5wtgp080	6 copies form hexons, 5 copies form pentons; involved in capsid morphogenesis	major capsid protein	AAR31638.1	GI:39842094	MENWSALELLPKVGIPTDFLTHVKTSAGEEMFEALRIYYGDDPE RYNIHFEAIFGTFCNRLEWVYFLTSGLAAAAHAIKFHDLNKLTTGKMLFHVQVPRVAS GAGLPTSRQTTIMVTKYSEKSPITIPFELSAACLTYLRETFEGTILDKILNVEAMHTV LRALKNTADAMERGLIHSFLQTLLRKAPPYFVVQTLVENATLARQALNRIQRSNILQS FKAKMLATLFLLNRTRDRDYVLKFLTRLAEAATDSILDNPTTYTTSSGAKISGVMVST ANVMQIIMSLLSSHITKETVSAPATYGNFVLSPENAVTAISYHSILADFNSYKAHLTS GQPHLPNDSLSQAGAHSLTPLSMDVIRLGEKTVIMENLRRVYKNTDTKDPLERNVDLT …
130089	SNV	A	G	0.0159236	9	13	69.2308	4	17	23.5294	AAR31639.1:p.Tyr143Cys	Yes	UL87	HHV5wtgp081	promotes accumulation of late transcripts	protein UL87	AAR31639.1	GI:39842095	MAGAAPRRLGCDALIVVGGSAMPRRVLHVPVHVRACNLTQELST GEDARFCRPRPVNVERVRAVFAALYRACPIHVRTEPERVKLVLGRLLLGPVAVPCFCD GEVEGHGEHLVPTTQFCRGPLLYVHRRCCCGSVTAGRALSYHVLENHVATHVLRGLLS LTEWNRELPSLFCDCPGGGGASGTEERYAMACLPRDLSLHLDDYPYLMVEIGRVLSVS EVDDYVTAVSGYLGEAAAPRIQVHYKLLFGLNVRPQAPCALDATRDFFLLELQKLWLG VEYHHEVTSEFFGRVLAQLHRDRARVMMALRLPEQTVCHLSTFVLSRFKRQVLYFKLQ VSYGKCRTGHADRSGGGGNGGNQGHHNLLCYRRLSVTFADTDTVWRNLFYVYYELARD …
130728	SNV	A	G	0.0159236	9	13	69.2308	4	17	23.5294	AAR31639.1:p.Asn356Ser	Yes	UL87	HHV5wtgp081	promotes accumulation of late transcripts	protein UL87	AAR31639.1	GI:39842095	MAGAAPRRLGCDALIVVGGSAMPRRVLHVPVHVRACNLTQELST GEDARFCRPRPVNVERVRAVFAALYRACPIHVRTEPERVKLVLGRLLLGPVAVPCFCD GEVEGHGEHLVPTTQFCRGPLLYVHRRCCCGSVTAGRALSYHVLENHVATHVLRGLLS LTEWNRELPSLFCDCPGGGGASGTEERYAMACLPRDLSLHLDDYPYLMVEIGRVLSVS EVDDYVTAVSGYLGEAAAPRIQVHYKLLFGLNVRPQAPCALDATRDFFLLELQKLWLG VEYHHEVTSEFFGRVLAQLHRDRARVMMALRLPEQTVCHLSTFVLSRFKRQVLYFKLQ VSYGKCRTGHADRSGGGGNGGNQGHHNLLCYRRLSVTFADTDTVWRNLFYVYYELARD …
130942	SNV	G	A	0.0354823	9	13	69.2308	5	17	29.4118		No	UL87	HHV5wtgp081	promotes accumulation of late transcripts	protein UL87	AAR31639.1	GI:39842095	MAGAAPRRLGCDALIVVGGSAMPRRVLHVPVHVRACNLTQELST GEDARFCRPRPVNVERVRAVFAALYRACPIHVRTEPERVKLVLGRLLLGPVAVPCFCD GEVEGHGEHLVPTTQFCRGPLLYVHRRCCCGSVTAGRALSYHVLENHVATHVLRGLLS LTEWNRELPSLFCDCPGGGGASGTEERYAMACLPRDLSLHLDDYPYLMVEIGRVLSVS EVDDYVTAVSGYLGEAAAPRIQVHYKLLFGLNVRPQAPCALDATRDFFLLELQKLWLG VEYHHEVTSEFFGRVLAQLHRDRARVMMALRLPEQTVCHLSTFVLSRFKRQVLYFKLQ VSYGKCRTGHADRSGGGGNGGNQGHHNLLCYRRLSVTFADTDTVWRNLFYVYYELARD …
130945	SNV	G	C	0.0354823	9	13	69.2308	5	17	29.4118		No	UL87	HHV5wtgp081	promotes accumulation of late transcripts	protein UL87	AAR31639.1	GI:39842095	MAGAAPRRLGCDALIVVGGSAMPRRVLHVPVHVRACNLTQELST GEDARFCRPRPVNVERVRAVFAALYRACPIHVRTEPERVKLVLGRLLLGPVAVPCFCD GEVEGHGEHLVPTTQFCRGPLLYVHRRCCCGSVTAGRALSYHVLENHVATHVLRGLLS LTEWNRELPSLFCDCPGGGGASGTEERYAMACLPRDLSLHLDDYPYLMVEIGRVLSVS EVDDYVTAVSGYLGEAAAPRIQVHYKLLFGLNVRPQAPCALDATRDFFLLELQKLWLG VEYHHEVTSEFFGRVLAQLHRDRARVMMALRLPEQTVCHLSTFVLSRFKRQVLYFKLQ VSYGKCRTGHADRSGGGGNGGNQGHHNLLCYRRLSVTFADTDTVWRNLFYVYYELARD …
131005	SNV	A	G	0.0415003	8	13	61.5385	4	17	23.5294		No	UL87	HHV5wtgp081	promotes accumulation of late transcripts	protein UL87	AAR31639.1	GI:39842095	MAGAAPRRLGCDALIVVGGSAMPRRVLHVPVHVRACNLTQELST GEDARFCRPRPVNVERVRAVFAALYRACPIHVRTEPERVKLVLGRLLLGPVAVPCFCD GEVEGHGEHLVPTTQFCRGPLLYVHRRCCCGSVTAGRALSYHVLENHVATHVLRGLLS LTEWNRELPSLFCDCPGGGGASGTEERYAMACLPRDLSLHLDDYPYLMVEIGRVLSVS EVDDYVTAVSGYLGEAAAPRIQVHYKLLFGLNVRPQAPCALDATRDFFLLELQKLWLG VEYHHEVTSEFFGRVLAQLHRDRARVMMALRLPEQTVCHLSTFVLSRFKRQVLYFKLQ VSYGKCRTGHADRSGGGGNGGNQGHHNLLCYRRLSVTFADTDTVWRNLFYVYYELARD …
131887	SNV	C	T	0.0450775	7	13	53.8462	3	17	17.6471		No	UL87	HHV5wtgp081	promotes accumulation of late transcripts	protein UL87	AAR31639.1	GI:39842095	MAGAAPRRLGCDALIVVGGSAMPRRVLHVPVHVRACNLTQELST GEDARFCRPRPVNVERVRAVFAALYRACPIHVRTEPERVKLVLGRLLLGPVAVPCFCD GEVEGHGEHLVPTTQFCRGPLLYVHRRCCCGSVTAGRALSYHVLENHVATHVLRGLLS LTEWNRELPSLFCDCPGGGGASGTEERYAMACLPRDLSLHLDDYPYLMVEIGRVLSVS EVDDYVTAVSGYLGEAAAPRIQVHYKLLFGLNVRPQAPCALDATRDFFLLELQKLWLG VEYHHEVTSEFFGRVLAQLHRDRARVMMALRLPEQTVCHLSTFVLSRFKRQVLYFKLQ VSYGKCRTGHADRSGGGGNGGNQGHHNLLCYRRLSVTFADTDTVWRNLFYVYYELARD …
131950	SNV	A	G	0.0415003	8	13	61.5385	4	17	23.5294		No	UL87	HHV5wtgp081	promotes accumulation of late transcripts	protein UL87	AAR31639.1	GI:39842095	MAGAAPRRLGCDALIVVGGSAMPRRVLHVPVHVRACNLTQELST GEDARFCRPRPVNVERVRAVFAALYRACPIHVRTEPERVKLVLGRLLLGPVAVPCFCD GEVEGHGEHLVPTTQFCRGPLLYVHRRCCCGSVTAGRALSYHVLENHVATHVLRGLLS LTEWNRELPSLFCDCPGGGGASGTEERYAMACLPRDLSLHLDDYPYLMVEIGRVLSVS EVDDYVTAVSGYLGEAAAPRIQVHYKLLFGLNVRPQAPCALDATRDFFLLELQKLWLG VEYHHEVTSEFFGRVLAQLHRDRARVMMALRLPEQTVCHLSTFVLSRFKRQVLYFKLQ VSYGKCRTGHADRSGGGGNGGNQGHHNLLCYRRLSVTFADTDTVWRNLFYVYYELARD …
132355	SNV	A	C	0.0415003	8	13	61.5385	4	17	23.5294		No	UL87	HHV5wtgp081	promotes accumulation of late transcripts	protein UL87	AAR31639.1	GI:39842095	MAGAAPRRLGCDALIVVGGSAMPRRVLHVPVHVRACNLTQELST GEDARFCRPRPVNVERVRAVFAALYRACPIHVRTEPERVKLVLGRLLLGPVAVPCFCD GEVEGHGEHLVPTTQFCRGPLLYVHRRCCCGSVTAGRALSYHVLENHVATHVLRGLLS LTEWNRELPSLFCDCPGGGGASGTEERYAMACLPRDLSLHLDDYPYLMVEIGRVLSVS EVDDYVTAVSGYLGEAAAPRIQVHYKLLFGLNVRPQAPCALDATRDFFLLELQKLWLG VEYHHEVTSEFFGRVLAQLHRDRARVMMALRLPEQTVCHLSTFVLSRFKRQVLYFKLQ VSYGKCRTGHADRSGGGGNGGNQGHHNLLCYRRLSVTFADTDTVWRNLFYVYYELARD …
132408	SNV	T	C	0.0159236	9	13	69.2308	4	17	23.5294	AAR31639.1:p.Val916Ala	Yes	UL87	HHV5wtgp081	promotes accumulation of late transcripts	protein UL87	AAR31639.1	GI:39842095	MAGAAPRRLGCDALIVVGGSAMPRRVLHVPVHVRACNLTQELST GEDARFCRPRPVNVERVRAVFAALYRACPIHVRTEPERVKLVLGRLLLGPVAVPCFCD GEVEGHGEHLVPTTQFCRGPLLYVHRRCCCGSVTAGRALSYHVLENHVATHVLRGLLS LTEWNRELPSLFCDCPGGGGASGTEERYAMACLPRDLSLHLDDYPYLMVEIGRVLSVS EVDDYVTAVSGYLGEAAAPRIQVHYKLLFGLNVRPQAPCALDATRDFFLLELQKLWLG VEYHHEVTSEFFGRVLAQLHRDRARVMMALRLPEQTVCHLSTFVLSRFKRQVLYFKLQ VSYGKCRTGHADRSGGGGNGGNQGHHNLLCYRRLSVTFADTDTVWRNLFYVYYELARD …
132663	SNV	C	T	0.00623974	8	13	61.5385	2	17	11.7647		No	UL88	HHV5wtgp082		tegument protein UL88	AAR31640.1	GI:39842096	MMEAAAAAAAAFRPEERPTPGWHDAALLMDDGTVREHAFRNGPL SQLIRRVLPPPPDAEDDVVFASELCFYCSGRFNRRSSVFSIYWQKHSDLVYALTGITH CAKLVVECGQLGSSRLRWRDGDASGEERRGDDDSRDELYDVPGIYMIRVNDGGSTGPR HVIWPGTSVLWAPDVVITTVQRRISAARALVNTFRQYFFLLERRSHEELVLCPPEMEE RLAPLLQSATRGDSDMFDGVVASAYHRLRMSNIPRSSARLLEHCVGLAGAKKLLLLDV PRLENYFLCQVCLYELDEDEMGEEMLGMLAGKPEDAAVSGASGGFLLHRKTMKLAACL CLLLNSLHLHQEALEALDPPPPRVEENDLVNVVLRRYYRSHGGVQARTLAAARALLAD …
132681	SNV	C	A	0.00623974	8	13	61.5385	2	17	11.7647		No	UL88	HHV5wtgp082		tegument protein UL88	AAR31640.1	GI:39842096	MMEAAAAAAAAFRPEERPTPGWHDAALLMDDGTVREHAFRNGPL SQLIRRVLPPPPDAEDDVVFASELCFYCSGRFNRRSSVFSIYWQKHSDLVYALTGITH CAKLVVECGQLGSSRLRWRDGDASGEERRGDDDSRDELYDVPGIYMIRVNDGGSTGPR HVIWPGTSVLWAPDVVITTVQRRISAARALVNTFRQYFFLLERRSHEELVLCPPEMEE RLAPLLQSATRGDSDMFDGVVASAYHRLRMSNIPRSSARLLEHCVGLAGAKKLLLLDV PRLENYFLCQVCLYELDEDEMGEEMLGMLAGKPEDAAVSGASGGFLLHRKTMKLAACL CLLLNSLHLHQEALEALDPPPPRVEENDLVNVVLRRYYRSHGGVQARTLAAARALLAD …
132829	SNV	A	G	0.000414079	9	13	69.2308	1	17	5.88235	AAR31640.1:p.Ser116Gly	Yes	UL88	HHV5wtgp082		tegument protein UL88	AAR31640.1	GI:39842096	MMEAAAAAAAAFRPEERPTPGWHDAALLMDDGTVREHAFRNGPL SQLIRRVLPPPPDAEDDVVFASELCFYCSGRFNRRSSVFSIYWQKHSDLVYALTGITH CAKLVVECGQLGSSRLRWRDGDASGEERRGDDDSRDELYDVPGIYMIRVNDGGSTGPR HVIWPGTSVLWAPDVVITTVQRRISAARALVNTFRQYFFLLERRSHEELVLCPPEMEE RLAPLLQSATRGDSDMFDGVVASAYHRLRMSNIPRSSARLLEHCVGLAGAKKLLLLDV PRLENYFLCQVCLYELDEDEMGEEMLGMLAGKPEDAAVSGASGGFLLHRKTMKLAACL CLLLNSLHLHQEALEALDPPPPRVEENDLVNVVLRRYYRSHGGVQARTLAAARALLAD …
132855	SNV	T	C	0.00157921	8	13	61.5385	1	17	5.88235		No	UL88	HHV5wtgp082		tegument protein UL88	AAR31640.1	GI:39842096	MMEAAAAAAAAFRPEERPTPGWHDAALLMDDGTVREHAFRNGPL SQLIRRVLPPPPDAEDDVVFASELCFYCSGRFNRRSSVFSIYWQKHSDLVYALTGITH CAKLVVECGQLGSSRLRWRDGDASGEERRGDDDSRDELYDVPGIYMIRVNDGGSTGPR HVIWPGTSVLWAPDVVITTVQRRISAARALVNTFRQYFFLLERRSHEELVLCPPEMEE RLAPLLQSATRGDSDMFDGVVASAYHRLRMSNIPRSSARLLEHCVGLAGAKKLLLLDV PRLENYFLCQVCLYELDEDEMGEEMLGMLAGKPEDAAVSGASGGFLLHRKTMKLAACL CLLLNSLHLHQEALEALDPPPPRVEENDLVNVVLRRYYRSHGGVQARTLAAARALLAD …
132859	SNV	A	G	0.00623974	8	13	61.5385	2	17	11.7647	AAR31640.1:p.Ser126Gly	Yes	UL88	HHV5wtgp082		tegument protein UL88	AAR31640.1	GI:39842096	MMEAAAAAAAAFRPEERPTPGWHDAALLMDDGTVREHAFRNGPL SQLIRRVLPPPPDAEDDVVFASELCFYCSGRFNRRSSVFSIYWQKHSDLVYALTGITH CAKLVVECGQLGSSRLRWRDGDASGEERRGDDDSRDELYDVPGIYMIRVNDGGSTGPR HVIWPGTSVLWAPDVVITTVQRRISAARALVNTFRQYFFLLERRSHEELVLCPPEMEE RLAPLLQSATRGDSDMFDGVVASAYHRLRMSNIPRSSARLLEHCVGLAGAKKLLLLDV PRLENYFLCQVCLYELDEDEMGEEMLGMLAGKPEDAAVSGASGGFLLHRKTMKLAACL CLLLNSLHLHQEALEALDPPPPRVEENDLVNVVLRRYYRSHGGVQARTLAAARALLAD …
132918	SNV	C	A	0.00623974	8	13	61.5385	2	17	11.7647		No	UL88	HHV5wtgp082		tegument protein UL88	AAR31640.1	GI:39842096	MMEAAAAAAAAFRPEERPTPGWHDAALLMDDGTVREHAFRNGPL SQLIRRVLPPPPDAEDDVVFASELCFYCSGRFNRRSSVFSIYWQKHSDLVYALTGITH CAKLVVECGQLGSSRLRWRDGDASGEERRGDDDSRDELYDVPGIYMIRVNDGGSTGPR HVIWPGTSVLWAPDVVITTVQRRISAARALVNTFRQYFFLLERRSHEELVLCPPEMEE RLAPLLQSATRGDSDMFDGVVASAYHRLRMSNIPRSSARLLEHCVGLAGAKKLLLLDV PRLENYFLCQVCLYELDEDEMGEEMLGMLAGKPEDAAVSGASGGFLLHRKTMKLAACL CLLLNSLHLHQEALEALDPPPPRVEENDLVNVVLRRYYRSHGGVQARTLAAARALLAD …
132924	SNV	T	C	0.00608643	9	13	69.2308	3	17	17.6471		No	UL88	HHV5wtgp082		tegument protein UL88	AAR31640.1	GI:39842096	MMEAAAAAAAAFRPEERPTPGWHDAALLMDDGTVREHAFRNGPL SQLIRRVLPPPPDAEDDVVFASELCFYCSGRFNRRSSVFSIYWQKHSDLVYALTGITH CAKLVVECGQLGSSRLRWRDGDASGEERRGDDDSRDELYDVPGIYMIRVNDGGSTGPR HVIWPGTSVLWAPDVVITTVQRRISAARALVNTFRQYFFLLERRSHEELVLCPPEMEE RLAPLLQSATRGDSDMFDGVVASAYHRLRMSNIPRSSARLLEHCVGLAGAKKLLLLDV PRLENYFLCQVCLYELDEDEMGEEMLGMLAGKPEDAAVSGASGGFLLHRKTMKLAACL CLLLNSLHLHQEALEALDPPPPRVEENDLVNVVLRRYYRSHGGVQARTLAAARALLAD …
132930	SNV	T	C	0.00608643	9	13	69.2308	3	17	17.6471		No	UL88	HHV5wtgp082		tegument protein UL88	AAR31640.1	GI:39842096	MMEAAAAAAAAFRPEERPTPGWHDAALLMDDGTVREHAFRNGPL SQLIRRVLPPPPDAEDDVVFASELCFYCSGRFNRRSSVFSIYWQKHSDLVYALTGITH CAKLVVECGQLGSSRLRWRDGDASGEERRGDDDSRDELYDVPGIYMIRVNDGGSTGPR HVIWPGTSVLWAPDVVITTVQRRISAARALVNTFRQYFFLLERRSHEELVLCPPEMEE RLAPLLQSATRGDSDMFDGVVASAYHRLRMSNIPRSSARLLEHCVGLAGAKKLLLLDV PRLENYFLCQVCLYELDEDEMGEEMLGMLAGKPEDAAVSGASGGFLLHRKTMKLAACL CLLLNSLHLHQEALEALDPPPPRVEENDLVNVVLRRYYRSHGGVQARTLAAARALLAD …
132963	SNV	A	G	0.0159236	9	13	69.2308	4	17	23.5294		No	UL88	HHV5wtgp082		tegument protein UL88	AAR31640.1	GI:39842096	MMEAAAAAAAAFRPEERPTPGWHDAALLMDDGTVREHAFRNGPL SQLIRRVLPPPPDAEDDVVFASELCFYCSGRFNRRSSVFSIYWQKHSDLVYALTGITH CAKLVVECGQLGSSRLRWRDGDASGEERRGDDDSRDELYDVPGIYMIRVNDGGSTGPR HVIWPGTSVLWAPDVVITTVQRRISAARALVNTFRQYFFLLERRSHEELVLCPPEMEE RLAPLLQSATRGDSDMFDGVVASAYHRLRMSNIPRSSARLLEHCVGLAGAKKLLLLDV PRLENYFLCQVCLYELDEDEMGEEMLGMLAGKPEDAAVSGASGGFLLHRKTMKLAACL CLLLNSLHLHQEALEALDPPPPRVEENDLVNVVLRRYYRSHGGVQARTLAAARALLAD …
133008	SNV	T	G	0.00187049	9	13	69.2308	2	17	11.7647		No	UL88	HHV5wtgp082		tegument protein UL88	AAR31640.1	GI:39842096	MMEAAAAAAAAFRPEERPTPGWHDAALLMDDGTVREHAFRNGPL SQLIRRVLPPPPDAEDDVVFASELCFYCSGRFNRRSSVFSIYWQKHSDLVYALTGITH CAKLVVECGQLGSSRLRWRDGDASGEERRGDDDSRDELYDVPGIYMIRVNDGGSTGPR HVIWPGTSVLWAPDVVITTVQRRISAARALVNTFRQYFFLLERRSHEELVLCPPEMEE RLAPLLQSATRGDSDMFDGVVASAYHRLRMSNIPRSSARLLEHCVGLAGAKKLLLLDV PRLENYFLCQVCLYELDEDEMGEEMLGMLAGKPEDAAVSGASGGFLLHRKTMKLAACL CLLLNSLHLHQEALEALDPPPPRVEENDLVNVVLRRYYRSHGGVQARTLAAARALLAD …
133071	SNV	A	G	0.0178911	8	13	61.5385	3	17	17.6471		No	UL88	HHV5wtgp082		tegument protein UL88	AAR31640.1	GI:39842096	MMEAAAAAAAAFRPEERPTPGWHDAALLMDDGTVREHAFRNGPL SQLIRRVLPPPPDAEDDVVFASELCFYCSGRFNRRSSVFSIYWQKHSDLVYALTGITH CAKLVVECGQLGSSRLRWRDGDASGEERRGDDDSRDELYDVPGIYMIRVNDGGSTGPR HVIWPGTSVLWAPDVVITTVQRRISAARALVNTFRQYFFLLERRSHEELVLCPPEMEE RLAPLLQSATRGDSDMFDGVVASAYHRLRMSNIPRSSARLLEHCVGLAGAKKLLLLDV PRLENYFLCQVCLYELDEDEMGEEMLGMLAGKPEDAAVSGASGGFLLHRKTMKLAACL CLLLNSLHLHQEALEALDPPPPRVEENDLVNVVLRRYYRSHGGVQARTLAAARALLAD …
133362	SNV	C	T	0.0450775	6	13	46.1538	2	17	11.7647		No	UL88	HHV5wtgp082		tegument protein UL88	AAR31640.1	GI:39842096	MMEAAAAAAAAFRPEERPTPGWHDAALLMDDGTVREHAFRNGPL SQLIRRVLPPPPDAEDDVVFASELCFYCSGRFNRRSSVFSIYWQKHSDLVYALTGITH CAKLVVECGQLGSSRLRWRDGDASGEERRGDDDSRDELYDVPGIYMIRVNDGGSTGPR HVIWPGTSVLWAPDVVITTVQRRISAARALVNTFRQYFFLLERRSHEELVLCPPEMEE RLAPLLQSATRGDSDMFDGVVASAYHRLRMSNIPRSSARLLEHCVGLAGAKKLLLLDV PRLENYFLCQVCLYELDEDEMGEEMLGMLAGKPEDAAVSGASGGFLLHRKTMKLAACL CLLLNSLHLHQEALEALDPPPPRVEENDLVNVVLRRYYRSHGGVQARTLAAARALLAD …
134808	SNV	A	G	0.0178911	7	13	53.8462	2	17	11.7647		No	UL89	HHV5wtgp083	contains ATPase domain; involved in DNA encapsidation	DNA packaging terminase subunit 1	AAR31641.1	GI:39842097	MLRGDSAAKIQERYAELQKRKSHPTSCISTAFTNVAALCRKRYQ MMHPELGLAHSCNEAFLPLMAFCGRHRDYNSPEESQRELLFHERLKSALDELTFRPCS EEQRASYQKLDALTELYRDPQFQQINNFMTDFKKWLDGGFSTAVEGDAKAIRLEPFQK NLLIHVIFFIAVTKIPVLANRVLQYLIHAFQIDFLSQTSIDIFKQKATVFLVPRRHGK TWFIIPIISFLLKHMIGISIGYVAHQKHVSQFVLKEVEFRCRHTFARDYVVENKDNVI SIDHRGAKSTALFASCYNTNSIRGQNFHLLLVDEAHFIKKEAFNTILGFLAQNTTKII FISSTNTTSDATCFLTRLNNAPFDMLNVVSYVCEEHLHSFTEKGDATACPCYRLHKPT …
134913..134914	Deletion	AG	-	0.0450775	7	13	53.8462	3	17	17.6471		-
134968	SNV	C	T	0.0450775	7	13	53.8462	3	17	17.6471		-
134975	SNV	G	T	0.0450775	7	13	53.8462	3	17	17.6471		-
136611	SNV	T	C	0.0415003	8	13	61.5385	4	17	23.5294		No	UL93	HHV5wtgp086	capsid-associated; involved in DNA encapsidation; involved in capsid transport	DNA packaging tegument protein UL17	AAR31644.1	GI:39842100	METHLYSDLAFEARFADDEQLPLHLVLDQEVLSNEEAETLRYVY YRNVDSAGRSAGRVPSGDEDDAPASDDAEDAVGGDRAFDRERRTWQRACFRVLPRPLE LLDYLRQSGLTVTLEKEQRVRMFYAVFTTLGLRCPDNRLSGAQTLHLRLVWPDGSYRD WEFLARDLLREEMEANKRDRQHQLATTTNHRRRGGLRNNLDNGSDRRLPEAAVASLET AVSTPFFEIPNGAGTSSANGGGRFSNLEQRVARLLRGDEEFIYHAGPLEPPSKIRGHE LVQLRLDVNPDLMYATDPHDRDEVARTDEWKGAGVSRLREVWDVQHRVRLRVLWYVNS FWRSRELSYDDHEVELYRALDAYRARIAVEYVLIRAVRDEIYAVLRRDSGALPQRFAC …
136634	SNV	G	A	0.0450775	6	13	46.1538	2	17	11.7647	AAR31644.1:p.Arg206His	Yes	UL93	HHV5wtgp086	capsid-associated; involved in DNA encapsidation; involved in capsid transport	DNA packaging tegument protein UL17	AAR31644.1	GI:39842100	METHLYSDLAFEARFADDEQLPLHLVLDQEVLSNEEAETLRYVY YRNVDSAGRSAGRVPSGDEDDAPASDDAEDAVGGDRAFDRERRTWQRACFRVLPRPLE LLDYLRQSGLTVTLEKEQRVRMFYAVFTTLGLRCPDNRLSGAQTLHLRLVWPDGSYRD WEFLARDLLREEMEANKRDRQHQLATTTNHRRRGGLRNNLDNGSDRRLPEAAVASLET AVSTPFFEIPNGAGTSSANGGGRFSNLEQRVARLLRGDEEFIYHAGPLEPPSKIRGHE LVQLRLDVNPDLMYATDPHDRDEVARTDEWKGAGVSRLREVWDVQHRVRLRVLWYVNS FWRSRELSYDDHEVELYRALDAYRARIAVEYVLIRAVRDEIYAVLRRDSGALPQRFAC …
136692	SNV	T	C	0.0415003	8	13	61.5385	4	17	23.5294		No	UL93	HHV5wtgp086	capsid-associated; involved in DNA encapsidation; involved in capsid transport	DNA packaging tegument protein UL17	AAR31644.1	GI:39842100	METHLYSDLAFEARFADDEQLPLHLVLDQEVLSNEEAETLRYVY YRNVDSAGRSAGRVPSGDEDDAPASDDAEDAVGGDRAFDRERRTWQRACFRVLPRPLE LLDYLRQSGLTVTLEKEQRVRMFYAVFTTLGLRCPDNRLSGAQTLHLRLVWPDGSYRD WEFLARDLLREEMEANKRDRQHQLATTTNHRRRGGLRNNLDNGSDRRLPEAAVASLET AVSTPFFEIPNGAGTSSANGGGRFSNLEQRVARLLRGDEEFIYHAGPLEPPSKIRGHE LVQLRLDVNPDLMYATDPHDRDEVARTDEWKGAGVSRLREVWDVQHRVRLRVLWYVNS FWRSRELSYDDHEVELYRALDAYRARIAVEYVLIRAVRDEIYAVLRRDSGALPQRFAC …
136947	SNV	T	C	0.0415003	8	13	61.5385	4	17	23.5294		No	UL93	HHV5wtgp086	capsid-associated; involved in DNA encapsidation; involved in capsid transport	DNA packaging tegument protein UL17	AAR31644.1	GI:39842100	METHLYSDLAFEARFADDEQLPLHLVLDQEVLSNEEAETLRYVY YRNVDSAGRSAGRVPSGDEDDAPASDDAEDAVGGDRAFDRERRTWQRACFRVLPRPLE LLDYLRQSGLTVTLEKEQRVRMFYAVFTTLGLRCPDNRLSGAQTLHLRLVWPDGSYRD WEFLARDLLREEMEANKRDRQHQLATTTNHRRRGGLRNNLDNGSDRRLPEAAVASLET AVSTPFFEIPNGAGTSSANGGGRFSNLEQRVARLLRGDEEFIYHAGPLEPPSKIRGHE LVQLRLDVNPDLMYATDPHDRDEVARTDEWKGAGVSRLREVWDVQHRVRLRVLWYVNS FWRSRELSYDDHEVELYRALDAYRARIAVEYVLIRAVRDEIYAVLRRDSGALPQRFAC …
137385	SNV	G	A	0.00288998	6	13	46.1538	0	17	0		No	UL93	HHV5wtgp086	capsid-associated; involved in DNA encapsidation; involved in capsid transport	DNA packaging tegument protein UL17	AAR31644.1	GI:39842100	METHLYSDLAFEARFADDEQLPLHLVLDQEVLSNEEAETLRYVY YRNVDSAGRSAGRVPSGDEDDAPASDDAEDAVGGDRAFDRERRTWQRACFRVLPRPLE LLDYLRQSGLTVTLEKEQRVRMFYAVFTTLGLRCPDNRLSGAQTLHLRLVWPDGSYRD WEFLARDLLREEMEANKRDRQHQLATTTNHRRRGGLRNNLDNGSDRRLPEAAVASLET AVSTPFFEIPNGAGTSSANGGGRFSNLEQRVARLLRGDEEFIYHAGPLEPPSKIRGHE LVQLRLDVNPDLMYATDPHDRDEVARTDEWKGAGVSRLREVWDVQHRVRLRVLWYVNS FWRSRELSYDDHEVELYRALDAYRARIAVEYVLIRAVRDEIYAVLRRDSGALPQRFAC …
137394	SNV	C	T	0.0090312	5	13	38.4615	0	17	0		No	UL93	HHV5wtgp086	capsid-associated; involved in DNA encapsidation; involved in capsid transport	DNA packaging tegument protein UL17	AAR31644.1	GI:39842100	METHLYSDLAFEARFADDEQLPLHLVLDQEVLSNEEAETLRYVY YRNVDSAGRSAGRVPSGDEDDAPASDDAEDAVGGDRAFDRERRTWQRACFRVLPRPLE LLDYLRQSGLTVTLEKEQRVRMFYAVFTTLGLRCPDNRLSGAQTLHLRLVWPDGSYRD WEFLARDLLREEMEANKRDRQHQLATTTNHRRRGGLRNNLDNGSDRRLPEAAVASLET AVSTPFFEIPNGAGTSSANGGGRFSNLEQRVARLLRGDEEFIYHAGPLEPPSKIRGHE LVQLRLDVNPDLMYATDPHDRDEVARTDEWKGAGVSRLREVWDVQHRVRLRVLWYVNS FWRSRELSYDDHEVELYRALDAYRARIAVEYVLIRAVRDEIYAVLRRDSGALPQRFAC …
137529	SNV	C	T	0.0450775	7	13	53.8462	3	17	17.6471		No	UL93	HHV5wtgp086	capsid-associated; involved in DNA encapsidation; involved in capsid transport	DNA packaging tegument protein UL17	AAR31644.1	GI:39842100	METHLYSDLAFEARFADDEQLPLHLVLDQEVLSNEEAETLRYVY YRNVDSAGRSAGRVPSGDEDDAPASDDAEDAVGGDRAFDRERRTWQRACFRVLPRPLE LLDYLRQSGLTVTLEKEQRVRMFYAVFTTLGLRCPDNRLSGAQTLHLRLVWPDGSYRD WEFLARDLLREEMEANKRDRQHQLATTTNHRRRGGLRNNLDNGSDRRLPEAAVASLET AVSTPFFEIPNGAGTSSANGGGRFSNLEQRVARLLRGDEEFIYHAGPLEPPSKIRGHE LVQLRLDVNPDLMYATDPHDRDEVARTDEWKGAGVSRLREVWDVQHRVRLRVLWYVNS FWRSRELSYDDHEVELYRALDAYRARIAVEYVLIRAVRDEIYAVLRRDSGALPQRFAC …
137637	SNV	C	T	0.0178911	8	13	61.5385	3	17	17.6471		No	UL93	HHV5wtgp086	capsid-associated; involved in DNA encapsidation; involved in capsid transport	DNA packaging tegument protein UL17	AAR31644.1	GI:39842100	METHLYSDLAFEARFADDEQLPLHLVLDQEVLSNEEAETLRYVY YRNVDSAGRSAGRVPSGDEDDAPASDDAEDAVGGDRAFDRERRTWQRACFRVLPRPLE LLDYLRQSGLTVTLEKEQRVRMFYAVFTTLGLRCPDNRLSGAQTLHLRLVWPDGSYRD WEFLARDLLREEMEANKRDRQHQLATTTNHRRRGGLRNNLDNGSDRRLPEAAVASLET AVSTPFFEIPNGAGTSSANGGGRFSNLEQRVARLLRGDEEFIYHAGPLEPPSKIRGHE LVQLRLDVNPDLMYATDPHDRDEVARTDEWKGAGVSRLREVWDVQHRVRLRVLWYVNS FWRSRELSYDDHEVELYRALDAYRARIAVEYVLIRAVRDEIYAVLRRDSGALPQRFAC …
137640	SNV	C	G	0.00623974	8	13	61.5385	2	17	11.7647		No	UL93	HHV5wtgp086	capsid-associated; involved in DNA encapsidation; involved in capsid transport	DNA packaging tegument protein UL17	AAR31644.1	GI:39842100	METHLYSDLAFEARFADDEQLPLHLVLDQEVLSNEEAETLRYVY YRNVDSAGRSAGRVPSGDEDDAPASDDAEDAVGGDRAFDRERRTWQRACFRVLPRPLE LLDYLRQSGLTVTLEKEQRVRMFYAVFTTLGLRCPDNRLSGAQTLHLRLVWPDGSYRD WEFLARDLLREEMEANKRDRQHQLATTTNHRRRGGLRNNLDNGSDRRLPEAAVASLET AVSTPFFEIPNGAGTSSANGGGRFSNLEQRVARLLRGDEEFIYHAGPLEPPSKIRGHE LVQLRLDVNPDLMYATDPHDRDEVARTDEWKGAGVSRLREVWDVQHRVRLRVLWYVNS FWRSRELSYDDHEVELYRALDAYRARIAVEYVLIRAVRDEIYAVLRRDSGALPQRFAC …
137642..137643	MNV	CT	TC	0.00623974	8	13	61.5385	2	17	11.7647	AAR31644.1:p.Ser542Phe	Yes	UL93	HHV5wtgp086	capsid-associated; involved in DNA encapsidation; involved in capsid transport	DNA packaging tegument protein UL17	AAR31644.1	GI:39842100	METHLYSDLAFEARFADDEQLPLHLVLDQEVLSNEEAETLRYVY YRNVDSAGRSAGRVPSGDEDDAPASDDAEDAVGGDRAFDRERRTWQRACFRVLPRPLE LLDYLRQSGLTVTLEKEQRVRMFYAVFTTLGLRCPDNRLSGAQTLHLRLVWPDGSYRD WEFLARDLLREEMEANKRDRQHQLATTTNHRRRGGLRNNLDNGSDRRLPEAAVASLET AVSTPFFEIPNGAGTSSANGGGRFSNLEQRVARLLRGDEEFIYHAGPLEPPSKIRGHE LVQLRLDVNPDLMYATDPHDRDEVARTDEWKGAGVSRLREVWDVQHRVRLRVLWYVNS FWRSRELSYDDHEVELYRALDAYRARIAVEYVLIRAVRDEIYAVLRRDSGALPQRFAC …
137816	SNV	G	A	0.0178911	8	13	61.5385	3	17	17.6471	AAR31645.1:p.Gly53Ser	Yes	UL94	HHV5wtgp087	possibly involved in virion morphogenesis	tegument protein UL16	AAR31645.1	GI:39842101	MAWRSGLCETDSRTLKQFLQEECMWKLVGKSRKHREYRAVACRS TIFSPEDDGSCILCQLLLFYRDGEWILCLCCNGRYQGHYGVGHVHRRRRRICHLPTLY QLSFGGPLGPASIDFLPSFSQVTSSMTCDGITPDVIYEVCMLVPQDEAKRILVKGHGA MDLTCQKAVTLGGAGAWLLPRPEGYTLFFYILCYDLFTSCGNRCDIPSMTRLMAAATA CGQAGCSFCTDHEGHVDPTGNYVGCTPDMGRCLCYVPCGPMTQSLIHNEEPATFFCES DDAKYLCAVGSKTAAQVTLGDGLDYHIGVKDSEGRWLPVKTDVWDLVKVEEPVSRMIV CSCPVLKNLVH
137876	SNV	C	T	0.00623974	8	13	61.5385	2	17	11.7647	AAR31645.1:p.Leu73Phe	Yes	UL94	HHV5wtgp087	possibly involved in virion morphogenesis	tegument protein UL16	AAR31645.1	GI:39842101	MAWRSGLCETDSRTLKQFLQEECMWKLVGKSRKHREYRAVACRS TIFSPEDDGSCILCQLLLFYRDGEWILCLCCNGRYQGHYGVGHVHRRRRRICHLPTLY QLSFGGPLGPASIDFLPSFSQVTSSMTCDGITPDVIYEVCMLVPQDEAKRILVKGHGA MDLTCQKAVTLGGAGAWLLPRPEGYTLFFYILCYDLFTSCGNRCDIPSMTRLMAAATA CGQAGCSFCTDHEGHVDPTGNYVGCTPDMGRCLCYVPCGPMTQSLIHNEEPATFFCES DDAKYLCAVGSKTAAQVTLGDGLDYHIGVKDSEGRWLPVKTDVWDLVKVEEPVSRMIV CSCPVLKNLVH
137915	SNV	G	A	0.00623974	8	13	61.5385	2	17	11.7647	AAR31645.1:p.Gly86Ser	Yes	UL94	HHV5wtgp087	possibly involved in virion morphogenesis	tegument protein UL16	AAR31645.1	GI:39842101	MAWRSGLCETDSRTLKQFLQEECMWKLVGKSRKHREYRAVACRS TIFSPEDDGSCILCQLLLFYRDGEWILCLCCNGRYQGHYGVGHVHRRRRRICHLPTLY QLSFGGPLGPASIDFLPSFSQVTSSMTCDGITPDVIYEVCMLVPQDEAKRILVKGHGA MDLTCQKAVTLGGAGAWLLPRPEGYTLFFYILCYDLFTSCGNRCDIPSMTRLMAAATA CGQAGCSFCTDHEGHVDPTGNYVGCTPDMGRCLCYVPCGPMTQSLIHNEEPATFFCES DDAKYLCAVGSKTAAQVTLGDGLDYHIGVKDSEGRWLPVKTDVWDLVKVEEPVSRMIV CSCPVLKNLVH
138271	SNV	C	T	0.000842912	7	13	53.8462	0	17	0		No	UL94	HHV5wtgp087	possibly involved in virion morphogenesis	tegument protein UL16	AAR31645.1	GI:39842101	MAWRSGLCETDSRTLKQFLQEECMWKLVGKSRKHREYRAVACRS TIFSPEDDGSCILCQLLLFYRDGEWILCLCCNGRYQGHYGVGHVHRRRRRICHLPTLY QLSFGGPLGPASIDFLPSFSQVTSSMTCDGITPDVIYEVCMLVPQDEAKRILVKGHGA MDLTCQKAVTLGGAGAWLLPRPEGYTLFFYILCYDLFTSCGNRCDIPSMTRLMAAATA CGQAGCSFCTDHEGHVDPTGNYVGCTPDMGRCLCYVPCGPMTQSLIHNEEPATFFCES DDAKYLCAVGSKTAAQVTLGDGLDYHIGVKDSEGRWLPVKTDVWDLVKVEEPVSRMIV CSCPVLKNLVH
138574	SNV	C	T	0.0415003	8	13	61.5385	4	17	23.5294		No	UL94	HHV5wtgp087	possibly involved in virion morphogenesis	tegument protein UL16	AAR31645.1	GI:39842101	MAWRSGLCETDSRTLKQFLQEECMWKLVGKSRKHREYRAVACRS TIFSPEDDGSCILCQLLLFYRDGEWILCLCCNGRYQGHYGVGHVHRRRRRICHLPTLY QLSFGGPLGPASIDFLPSFSQVTSSMTCDGITPDVIYEVCMLVPQDEAKRILVKGHGA MDLTCQKAVTLGGAGAWLLPRPEGYTLFFYILCYDLFTSCGNRCDIPSMTRLMAAATA CGQAGCSFCTDHEGHVDPTGNYVGCTPDMGRCLCYVPCGPMTQSLIHNEEPATFFCES DDAKYLCAVGSKTAAQVTLGDGLDYHIGVKDSEGRWLPVKTDVWDLVKVEEPVSRMIV CSCPVLKNLVH
139765	SNV	T	G	0.0415003	8	13	61.5385	4	17	23.5294	AAR31646.1:p.Ser24Ala	Yes	UL95	HHV5wtgp088	promotes accumulation of late transcripts	protein UL95	AAR31646.1	GI:39842102	MMAAAVVRAEVRRQRREERKKMASARTTEDPPENHVVADVACGT GAVTRSSSSSLVVSSSSASGSDESSSASPLSFPVSSPSTAVRSPGSAGVSTSLCSVER MVELSAQSPAADFSVSEAWRFEEAVNMALVACEAVSPYDRFRLIETPDENFLLVTNVI PRESAEVPVLDSSSSGGDSGPEDKKKNVGNKTAGEKNGGGSRAKRRRRRRAPKNDAAT PSFLRRHDVLERFAAAAEPLPSLCVHDYALRNADRVTYDGELIYGSYLLYRKAHVELS LSSNKVQHVEAVLRQVYTPGLLDHHNVCDVEALLWLLYCGPRSFCARDTCFGREKNGC PFPALLPKLFYEPVRDYMTYMNLAELYVFVWYRGYEFPAPTPQATTAGGGGGGGSGGG …
139890	SNV	A	G	0.0415003	8	13	61.5385	4	17	23.5294		No	UL95	HHV5wtgp088	promotes accumulation of late transcripts	protein UL95	AAR31646.1	GI:39842102	MMAAAVVRAEVRRQRREERKKMASARTTEDPPENHVVADVACGT GAVTRSSSSSLVVSSSSASGSDESSSASPLSFPVSSPSTAVRSPGSAGVSTSLCSVER MVELSAQSPAADFSVSEAWRFEEAVNMALVACEAVSPYDRFRLIETPDENFLLVTNVI PRESAEVPVLDSSSSGGDSGPEDKKKNVGNKTAGEKNGGGSRAKRRRRRRAPKNDAAT PSFLRRHDVLERFAAAAEPLPSLCVHDYALRNADRVTYDGELIYGSYLLYRKAHVELS LSSNKVQHVEAVLRQVYTPGLLDHHNVCDVEALLWLLYCGPRSFCARDTCFGREKNGC PFPALLPKLFYEPVRDYMTYMNLAELYVFVWYRGYEFPAPTPQATTAGGGGGGGSGGG …
139929	SNV	C	G	0.0151724	6	13	46.1538	1	17	5.88235		No	UL95	HHV5wtgp088	promotes accumulation of late transcripts	protein UL95	AAR31646.1	GI:39842102	MMAAAVVRAEVRRQRREERKKMASARTTEDPPENHVVADVACGT GAVTRSSSSSLVVSSSSASGSDESSSASPLSFPVSSPSTAVRSPGSAGVSTSLCSVER MVELSAQSPAADFSVSEAWRFEEAVNMALVACEAVSPYDRFRLIETPDENFLLVTNVI PRESAEVPVLDSSSSGGDSGPEDKKKNVGNKTAGEKNGGGSRAKRRRRRRAPKNDAAT PSFLRRHDVLERFAAAAEPLPSLCVHDYALRNADRVTYDGELIYGSYLLYRKAHVELS LSSNKVQHVEAVLRQVYTPGLLDHHNVCDVEALLWLLYCGPRSFCARDTCFGREKNGC PFPALLPKLFYEPVRDYMTYMNLAELYVFVWYRGYEFPAPTPQATTAGGGGGGGSGGG …
140157	SNV	G	A	0.0151724	6	13	46.1538	1	17	5.88235		No	UL95	HHV5wtgp088	promotes accumulation of late transcripts	protein UL95	AAR31646.1	GI:39842102	MMAAAVVRAEVRRQRREERKKMASARTTEDPPENHVVADVACGT GAVTRSSSSSLVVSSSSASGSDESSSASPLSFPVSSPSTAVRSPGSAGVSTSLCSVER MVELSAQSPAADFSVSEAWRFEEAVNMALVACEAVSPYDRFRLIETPDENFLLVTNVI PRESAEVPVLDSSSSGGDSGPEDKKKNVGNKTAGEKNGGGSRAKRRRRRRAPKNDAAT PSFLRRHDVLERFAAAAEPLPSLCVHDYALRNADRVTYDGELIYGSYLLYRKAHVELS LSSNKVQHVEAVLRQVYTPGLLDHHNVCDVEALLWLLYCGPRSFCARDTCFGREKNGC PFPALLPKLFYEPVRDYMTYMNLAELYVFVWYRGYEFPAPTPQATTAGGGGGGGSGGG …
140288	SNV	G	A	0.0151724	6	13	46.1538	1	17	5.88235	AAR31646.1:p.Gly198Asp	Yes	UL95	HHV5wtgp088	promotes accumulation of late transcripts	protein UL95	AAR31646.1	GI:39842102	MMAAAVVRAEVRRQRREERKKMASARTTEDPPENHVVADVACGT GAVTRSSSSSLVVSSSSASGSDESSSASPLSFPVSSPSTAVRSPGSAGVSTSLCSVER MVELSAQSPAADFSVSEAWRFEEAVNMALVACEAVSPYDRFRLIETPDENFLLVTNVI PRESAEVPVLDSSSSGGDSGPEDKKKNVGNKTAGEKNGGGSRAKRRRRRRAPKNDAAT PSFLRRHDVLERFAAAAEPLPSLCVHDYALRNADRVTYDGELIYGSYLLYRKAHVELS LSSNKVQHVEAVLRQVYTPGLLDHHNVCDVEALLWLLYCGPRSFCARDTCFGREKNGC PFPALLPKLFYEPVRDYMTYMNLAELYVFVWYRGYEFPAPTPQATTAGGGGGGGSGGG …
140839..140847	Deletion	GGTGGTGGT	-	0.0354823	9	13	69.2308	5	17	29.4118	AAR31646.1:p.Gly386_Gly388del	Yes	UL95	HHV5wtgp088	promotes accumulation of late transcripts	protein UL95	AAR31646.1	GI:39842102	MMAAAVVRAEVRRQRREERKKMASARTTEDPPENHVVADVACGT GAVTRSSSSSLVVSSSSASGSDESSSASPLSFPVSSPSTAVRSPGSAGVSTSLCSVER MVELSAQSPAADFSVSEAWRFEEAVNMALVACEAVSPYDRFRLIETPDENFLLVTNVI PRESAEVPVLDSSSSGGDSGPEDKKKNVGNKTAGEKNGGGSRAKRRRRRRAPKNDAAT PSFLRRHDVLERFAAAAEPLPSLCVHDYALRNADRVTYDGELIYGSYLLYRKAHVELS LSSNKVQHVEAVLRQVYTPGLLDHHNVCDVEALLWLLYCGPRSFCARDTCFGREKNGC PFPALLPKLFYEPVRDYMTYMNLAELYVFVWYRGYEFPAPTPQATTAGGGGGGGSGGG …
140851	SNV	G	A	0.0415003	8	13	61.5385	4	17	23.5294	AAR31646.1:p.Gly386Ser	Yes	UL95	HHV5wtgp088	promotes accumulation of late transcripts	protein UL95	AAR31646.1	GI:39842102	MMAAAVVRAEVRRQRREERKKMASARTTEDPPENHVVADVACGT GAVTRSSSSSLVVSSSSASGSDESSSASPLSFPVSSPSTAVRSPGSAGVSTSLCSVER MVELSAQSPAADFSVSEAWRFEEAVNMALVACEAVSPYDRFRLIETPDENFLLVTNVI PRESAEVPVLDSSSSGGDSGPEDKKKNVGNKTAGEKNGGGSRAKRRRRRRAPKNDAAT PSFLRRHDVLERFAAAAEPLPSLCVHDYALRNADRVTYDGELIYGSYLLYRKAHVELS LSSNKVQHVEAVLRQVYTPGLLDHHNVCDVEALLWLLYCGPRSFCARDTCFGREKNGC PFPALLPKLFYEPVRDYMTYMNLAELYVFVWYRGYEFPAPTPQATTAGGGGGGGSGGG …
144899	SNV	G	A	0.0397373	5	13	38.4615	1	17	5.88235		No	UL98	HHV5wtgp091	involved in DNA processing	deoxyribonuclease	AAR31649.1	GI:39842105	MWGVSSLDYDDDEELTRLLAVWDDEPLSLFLMNTFLLHQEGFRN LPFTVLRLSYAYRIFAKMLRAHGTPVAEDFMTRVAALARDEGLRDILGQRHAAEASRA EIAEALERVAERCDDRHGGSDDYVWLSRLLDLAPNYRQVELFQLLEKESRGQSRNSVW HLLRMDTVSATKFYEAFVSGCLPGAAAADGSGGGGSHYTGSRAGVSPGIQFGIKHEGL VKTLVECYVMHGREPVRDGLGLLIDPTSGLLGASMDLCFGVLKQGSGRTLLVEPCARV YEIKCRYKYLRKKEDPFVQNVLRRHDAAAVASLLQSHPVPGVEFRGERETPSAREFLL SHDAALFRATLKRARPLKPPEPLREYLADLLYLNKAECSEVIVFDAKHLNDDNSDGDA …
146170	SNV	T	C	0.0450775	7	13	53.8462	3	17	17.6471		No	UL99	HHV5wtgp092	envelope-associated; involved in virion morphogenesis	myristylated tegument protein	AAR31650.1	GI:39842106	MGAELCKRICCEFGTTSGEPLKDALGRQVSLRSYDNIPPTSSSD EGEDDDDGEDDDNEERQQKLRLCGSGCGGNDSSSGSHREATHDGPKKNAVRSTFREDK APKPSKQSKKKKKPSKHHHHQQSSIMQETDDLDEEDTSIYLSPPPVPPVQVVAKRLPR PDTPRTPRQKKISQRPPTPGTKKPAASLPF
146280	SNV	T	C	0.0415003	8	13	61.5385	4	17	23.5294		-
146314	SNV	G	A	0.0397373	5	13	38.4615	1	17	5.88235		-
146664	SNV	G	A	0.0450775	6	13	46.1538	2	17	11.7647		No	UL100	HHV5wtgp093	type 3 membrane protein; 8 transmembrane domains; complexed with envelope glycoprotein N; involved in virion morphogenesis; involved in membrane fusion	envelope glycoprotein M	AAR31651.1	GI:39842107	MAPSHVDKVNTRTWSASIVFMVLTFVNVSVHLVLSNFPHLGYPC VYYHVVDFERLNMSAYNVMHLHTPMLFLDSVQLVCYAVFMQLVFLAVTIYYLVCWIKI SMRKDKGMSLNQSTRDISYMGDSLTAFLFILSMDTFQLFTLTMSFRLPSMIAFMAAVH FFCLTIFNVSMVTQYRSYKRSLFFFSRLHPKLKGTVQFRTLIVNLVEVALGFNTTVVA MALCYGFGNNFFVRTGHMVLAVFVVYAIISIIYFLLIEAVFFQYVKVQFGYHLGAFFG LCGLIYPIVQYDTFLSNEYRTGISWSFGMLFFIWAMFTTCRAVRYFRGRGSGSVKYQA LATASGEEVAALSHHDSLESRRLREEEDDDDEDFEDA
146694	SNV	G	A	0.0450775	6	13	46.1538	2	17	11.7647		No	UL100	HHV5wtgp093	type 3 membrane protein; 8 transmembrane domains; complexed with envelope glycoprotein N; involved in virion morphogenesis; involved in membrane fusion	envelope glycoprotein M	AAR31651.1	GI:39842107	MAPSHVDKVNTRTWSASIVFMVLTFVNVSVHLVLSNFPHLGYPC VYYHVVDFERLNMSAYNVMHLHTPMLFLDSVQLVCYAVFMQLVFLAVTIYYLVCWIKI SMRKDKGMSLNQSTRDISYMGDSLTAFLFILSMDTFQLFTLTMSFRLPSMIAFMAAVH FFCLTIFNVSMVTQYRSYKRSLFFFSRLHPKLKGTVQFRTLIVNLVEVALGFNTTVVA MALCYGFGNNFFVRTGHMVLAVFVVYAIISIIYFLLIEAVFFQYVKVQFGYHLGAFFG LCGLIYPIVQYDTFLSNEYRTGISWSFGMLFFIWAMFTTCRAVRYFRGRGSGSVKYQA LATASGEEVAALSHHDSLESRRLREEEDDDDEDFEDA
148646	SNV	C	T	0.0415003	8	13	61.5385	4	17	23.5294		No	UL102	HHV5wtgp094	involved in DNA replication	helicase-primase subunit	AAR31652.1	GI:39842108	MTAQPPLHHRHHPYTLFGTSCHLSWYGLLEASVPIVQCLFLDLG GGRAEPRLHTFVVRGDRLPPAEVRAVHRASYAALASAVTTDADERRRGLEQRSAVLAR VLLEGSALIRVLARTFTPVQIQTDASGVEILEAAPALGVETTALSNALSLFHVAKLVV IGSYPEVHEPRVVTHAAERVSEEYGTHAHKKLRRGYYAYDLAMSFRVGTHKYVLERDD EAVLARLFEVREVCFLRTCLRLVTPVGFVAVAVTDEQCCLLLQSAWTHLYDVLFRGFA GQPPLRDYLGPDLFETGAARSFFFPGFPPVPVYAVHGLHTLMRETALDAAAEVLSWCG LPDIVGSAGKLEVEPCALSLGVPEDEWQVFGTEAGGGAVRLNATAFRERPAGGDRRWL …
151872	SNV	G	A	0.0450775	7	13	53.8462	3	17	17.6471		No	UL104	HHV5wtgp096	dodecamer located at one capsid vertex in place of penton; involved in DNA encapsidation	capsid portal protein	AAR31654.1	GI:39842110	MERNHWNEKSSGAKRSRERDLTLSTIRSILAADERLRIKASSYL GVGRGVDDEAVIDIFPTGQTMSFLRLLHGFLGTCRGQSMHQVLRDPCVLRKQLLYGVC KTLFDTITVRRVAEEWKLHAALFPYRALDEEDLEQYLLVWSASLRQSVQTGVLGALRD ILYQYADNDDYGLYVDWCVTVGLVPLLDVKTKPSEAAERAQFVRAAVQRATETHPLAQ DLLQANLALLLQVAERLGAVRIANAPEVRVFKKVRSERLEAQLRGKHIRLYVAAEPLA YERDKLLFTTPVAHLHEEILRYDGLCRHQKICQLLNTFPVKVVTASRHELNCKKLVEM MEQHDRGSDAKKSIMKFLLNVSDSKSRIGIEDSVESFLQDLTPSLVDQNRLLPARGPG …
151882	SNV	G	A	0.0450775	7	13	53.8462	3	17	17.6471		No	UL104	HHV5wtgp096	dodecamer located at one capsid vertex in place of penton; involved in DNA encapsidation	capsid portal protein	AAR31654.1	GI:39842110	MERNHWNEKSSGAKRSRERDLTLSTIRSILAADERLRIKASSYL GVGRGVDDEAVIDIFPTGQTMSFLRLLHGFLGTCRGQSMHQVLRDPCVLRKQLLYGVC KTLFDTITVRRVAEEWKLHAALFPYRALDEEDLEQYLLVWSASLRQSVQTGVLGALRD ILYQYADNDDYGLYVDWCVTVGLVPLLDVKTKPSEAAERAQFVRAAVQRATETHPLAQ DLLQANLALLLQVAERLGAVRIANAPEVRVFKKVRSERLEAQLRGKHIRLYVAAEPLA YERDKLLFTTPVAHLHEEILRYDGLCRHQKICQLLNTFPVKVVTASRHELNCKKLVEM MEQHDRGSDAKKSIMKFLLNVSDSKSRIGIEDSVESFLQDLTPSLVDQNRLLPARGPG …
151945	SNV	G	A	0.0151724	6	13	46.1538	1	17	5.88235		No	UL104	HHV5wtgp096	dodecamer located at one capsid vertex in place of penton; involved in DNA encapsidation	capsid portal protein	AAR31654.1	GI:39842110	MERNHWNEKSSGAKRSRERDLTLSTIRSILAADERLRIKASSYL GVGRGVDDEAVIDIFPTGQTMSFLRLLHGFLGTCRGQSMHQVLRDPCVLRKQLLYGVC KTLFDTITVRRVAEEWKLHAALFPYRALDEEDLEQYLLVWSASLRQSVQTGVLGALRD ILYQYADNDDYGLYVDWCVTVGLVPLLDVKTKPSEAAERAQFVRAAVQRATETHPLAQ DLLQANLALLLQVAERLGAVRIANAPEVRVFKKVRSERLEAQLRGKHIRLYVAAEPLA YERDKLLFTTPVAHLHEEILRYDGLCRHQKICQLLNTFPVKVVTASRHELNCKKLVEM MEQHDRGSDAKKSIMKFLLNVSDSKSRIGIEDSVESFLQDLTPSLVDQNRLLPARGPG …
151975	SNV	C	G	0.0415003	8	13	61.5385	4	17	23.5294		No	UL104	HHV5wtgp096	dodecamer located at one capsid vertex in place of penton; involved in DNA encapsidation	capsid portal protein	AAR31654.1	GI:39842110	MERNHWNEKSSGAKRSRERDLTLSTIRSILAADERLRIKASSYL GVGRGVDDEAVIDIFPTGQTMSFLRLLHGFLGTCRGQSMHQVLRDPCVLRKQLLYGVC KTLFDTITVRRVAEEWKLHAALFPYRALDEEDLEQYLLVWSASLRQSVQTGVLGALRD ILYQYADNDDYGLYVDWCVTVGLVPLLDVKTKPSEAAERAQFVRAAVQRATETHPLAQ DLLQANLALLLQVAERLGAVRIANAPEVRVFKKVRSERLEAQLRGKHIRLYVAAEPLA YERDKLLFTTPVAHLHEEILRYDGLCRHQKICQLLNTFPVKVVTASRHELNCKKLVEM MEQHDRGSDAKKSIMKFLLNVSDSKSRIGIEDSVESFLQDLTPSLVDQNRLLPARGPG …
152041	SNV	C	A	0.0151724	6	13	46.1538	1	17	5.88235		No	UL104	HHV5wtgp096	dodecamer located at one capsid vertex in place of penton; involved in DNA encapsidation	capsid portal protein	AAR31654.1	GI:39842110	MERNHWNEKSSGAKRSRERDLTLSTIRSILAADERLRIKASSYL GVGRGVDDEAVIDIFPTGQTMSFLRLLHGFLGTCRGQSMHQVLRDPCVLRKQLLYGVC KTLFDTITVRRVAEEWKLHAALFPYRALDEEDLEQYLLVWSASLRQSVQTGVLGALRD ILYQYADNDDYGLYVDWCVTVGLVPLLDVKTKPSEAAERAQFVRAAVQRATETHPLAQ DLLQANLALLLQVAERLGAVRIANAPEVRVFKKVRSERLEAQLRGKHIRLYVAAEPLA YERDKLLFTTPVAHLHEEILRYDGLCRHQKICQLLNTFPVKVVTASRHELNCKKLVEM MEQHDRGSDAKKSIMKFLLNVSDSKSRIGIEDSVESFLQDLTPSLVDQNRLLPARGPG …
152065	SNV	C	T	0.0450775	7	13	53.8462	3	17	17.6471		No	UL104	HHV5wtgp096	dodecamer located at one capsid vertex in place of penton; involved in DNA encapsidation	capsid portal protein	AAR31654.1	GI:39842110	MERNHWNEKSSGAKRSRERDLTLSTIRSILAADERLRIKASSYL GVGRGVDDEAVIDIFPTGQTMSFLRLLHGFLGTCRGQSMHQVLRDPCVLRKQLLYGVC KTLFDTITVRRVAEEWKLHAALFPYRALDEEDLEQYLLVWSASLRQSVQTGVLGALRD ILYQYADNDDYGLYVDWCVTVGLVPLLDVKTKPSEAAERAQFVRAAVQRATETHPLAQ DLLQANLALLLQVAERLGAVRIANAPEVRVFKKVRSERLEAQLRGKHIRLYVAAEPLA YERDKLLFTTPVAHLHEEILRYDGLCRHQKICQLLNTFPVKVVTASRHELNCKKLVEM MEQHDRGSDAKKSIMKFLLNVSDSKSRIGIEDSVESFLQDLTPSLVDQNRLLPARGPG …
152197	SNV	C	T	0.0151724	6	13	46.1538	1	17	5.88235		No	UL104	HHV5wtgp096	dodecamer located at one capsid vertex in place of penton; involved in DNA encapsidation	capsid portal protein	AAR31654.1	GI:39842110	MERNHWNEKSSGAKRSRERDLTLSTIRSILAADERLRIKASSYL GVGRGVDDEAVIDIFPTGQTMSFLRLLHGFLGTCRGQSMHQVLRDPCVLRKQLLYGVC KTLFDTITVRRVAEEWKLHAALFPYRALDEEDLEQYLLVWSASLRQSVQTGVLGALRD ILYQYADNDDYGLYVDWCVTVGLVPLLDVKTKPSEAAERAQFVRAAVQRATETHPLAQ DLLQANLALLLQVAERLGAVRIANAPEVRVFKKVRSERLEAQLRGKHIRLYVAAEPLA YERDKLLFTTPVAHLHEEILRYDGLCRHQKICQLLNTFPVKVVTASRHELNCKKLVEM MEQHDRGSDAKKSIMKFLLNVSDSKSRIGIEDSVESFLQDLTPSLVDQNRLLPARGPG …
152212	SNV	T	C	0.0450775	7	13	53.8462	3	17	17.6471		No	UL104	HHV5wtgp096	dodecamer located at one capsid vertex in place of penton; involved in DNA encapsidation	capsid portal protein	AAR31654.1	GI:39842110	MERNHWNEKSSGAKRSRERDLTLSTIRSILAADERLRIKASSYL GVGRGVDDEAVIDIFPTGQTMSFLRLLHGFLGTCRGQSMHQVLRDPCVLRKQLLYGVC KTLFDTITVRRVAEEWKLHAALFPYRALDEEDLEQYLLVWSASLRQSVQTGVLGALRD ILYQYADNDDYGLYVDWCVTVGLVPLLDVKTKPSEAAERAQFVRAAVQRATETHPLAQ DLLQANLALLLQVAERLGAVRIANAPEVRVFKKVRSERLEAQLRGKHIRLYVAAEPLA YERDKLLFTTPVAHLHEEILRYDGLCRHQKICQLLNTFPVKVVTASRHELNCKKLVEM MEQHDRGSDAKKSIMKFLLNVSDSKSRIGIEDSVESFLQDLTPSLVDQNRLLPARGPG …
152251	SNV	T	C	0.0450775	7	13	53.8462	3	17	17.6471		No	UL104	HHV5wtgp096	dodecamer located at one capsid vertex in place of penton; involved in DNA encapsidation	capsid portal protein	AAR31654.1	GI:39842110	MERNHWNEKSSGAKRSRERDLTLSTIRSILAADERLRIKASSYL GVGRGVDDEAVIDIFPTGQTMSFLRLLHGFLGTCRGQSMHQVLRDPCVLRKQLLYGVC KTLFDTITVRRVAEEWKLHAALFPYRALDEEDLEQYLLVWSASLRQSVQTGVLGALRD ILYQYADNDDYGLYVDWCVTVGLVPLLDVKTKPSEAAERAQFVRAAVQRATETHPLAQ DLLQANLALLLQVAERLGAVRIANAPEVRVFKKVRSERLEAQLRGKHIRLYVAAEPLA YERDKLLFTTPVAHLHEEILRYDGLCRHQKICQLLNTFPVKVVTASRHELNCKKLVEM MEQHDRGSDAKKSIMKFLLNVSDSKSRIGIEDSVESFLQDLTPSLVDQNRLLPARGPG …
152293	SNV	A	G	0.0415003	8	13	61.5385	4	17	23.5294		No	UL104	HHV5wtgp096	dodecamer located at one capsid vertex in place of penton; involved in DNA encapsidation	capsid portal protein	AAR31654.1	GI:39842110	MERNHWNEKSSGAKRSRERDLTLSTIRSILAADERLRIKASSYL GVGRGVDDEAVIDIFPTGQTMSFLRLLHGFLGTCRGQSMHQVLRDPCVLRKQLLYGVC KTLFDTITVRRVAEEWKLHAALFPYRALDEEDLEQYLLVWSASLRQSVQTGVLGALRD ILYQYADNDDYGLYVDWCVTVGLVPLLDVKTKPSEAAERAQFVRAAVQRATETHPLAQ DLLQANLALLLQVAERLGAVRIANAPEVRVFKKVRSERLEAQLRGKHIRLYVAAEPLA YERDKLLFTTPVAHLHEEILRYDGLCRHQKICQLLNTFPVKVVTASRHELNCKKLVEM MEQHDRGSDAKKSIMKFLLNVSDSKSRIGIEDSVESFLQDLTPSLVDQNRLLPARGPG …
152353	SNV	A	G	0.0450775	6	13	46.1538	2	17	11.7647		No	UL104	HHV5wtgp096	dodecamer located at one capsid vertex in place of penton; involved in DNA encapsidation	capsid portal protein	AAR31654.1	GI:39842110	MERNHWNEKSSGAKRSRERDLTLSTIRSILAADERLRIKASSYL GVGRGVDDEAVIDIFPTGQTMSFLRLLHGFLGTCRGQSMHQVLRDPCVLRKQLLYGVC KTLFDTITVRRVAEEWKLHAALFPYRALDEEDLEQYLLVWSASLRQSVQTGVLGALRD ILYQYADNDDYGLYVDWCVTVGLVPLLDVKTKPSEAAERAQFVRAAVQRATETHPLAQ DLLQANLALLLQVAERLGAVRIANAPEVRVFKKVRSERLEAQLRGKHIRLYVAAEPLA YERDKLLFTTPVAHLHEEILRYDGLCRHQKICQLLNTFPVKVVTASRHELNCKKLVEM MEQHDRGSDAKKSIMKFLLNVSDSKSRIGIEDSVESFLQDLTPSLVDQNRLLPARGPG …
152584	SNV	C	T	0.0450775	6	13	46.1538	2	17	11.7647		No	UL104	HHV5wtgp096	dodecamer located at one capsid vertex in place of penton; involved in DNA encapsidation	capsid portal protein	AAR31654.1	GI:39842110	MERNHWNEKSSGAKRSRERDLTLSTIRSILAADERLRIKASSYL GVGRGVDDEAVIDIFPTGQTMSFLRLLHGFLGTCRGQSMHQVLRDPCVLRKQLLYGVC KTLFDTITVRRVAEEWKLHAALFPYRALDEEDLEQYLLVWSASLRQSVQTGVLGALRD ILYQYADNDDYGLYVDWCVTVGLVPLLDVKTKPSEAAERAQFVRAAVQRATETHPLAQ DLLQANLALLLQVAERLGAVRIANAPEVRVFKKVRSERLEAQLRGKHIRLYVAAEPLA YERDKLLFTTPVAHLHEEILRYDGLCRHQKICQLLNTFPVKVVTASRHELNCKKLVEM MEQHDRGSDAKKSIMKFLLNVSDSKSRIGIEDSVESFLQDLTPSLVDQNRLLPARGPG …
152686	SNV	T	C	0.0450775	6	13	46.1538	2	17	11.7647	AAR31654.1:p.Ile240Met	Yes	UL104	HHV5wtgp096	dodecamer located at one capsid vertex in place of penton; involved in DNA encapsidation	capsid portal protein	AAR31654.1	GI:39842110	MERNHWNEKSSGAKRSRERDLTLSTIRSILAADERLRIKASSYL GVGRGVDDEAVIDIFPTGQTMSFLRLLHGFLGTCRGQSMHQVLRDPCVLRKQLLYGVC KTLFDTITVRRVAEEWKLHAALFPYRALDEEDLEQYLLVWSASLRQSVQTGVLGALRD ILYQYADNDDYGLYVDWCVTVGLVPLLDVKTKPSEAAERAQFVRAAVQRATETHPLAQ DLLQANLALLLQVAERLGAVRIANAPEVRVFKKVRSERLEAQLRGKHIRLYVAAEPLA YERDKLLFTTPVAHLHEEILRYDGLCRHQKICQLLNTFPVKVVTASRHELNCKKLVEM MEQHDRGSDAKKSIMKFLLNVSDSKSRIGIEDSVESFLQDLTPSLVDQNRLLPARGPG …
152943	SNV	G	A	0.0450775	6	13	46.1538	2	17	11.7647		No	UL104	HHV5wtgp096	dodecamer located at one capsid vertex in place of penton; involved in DNA encapsidation	capsid portal protein	AAR31654.1	GI:39842110	MERNHWNEKSSGAKRSRERDLTLSTIRSILAADERLRIKASSYL GVGRGVDDEAVIDIFPTGQTMSFLRLLHGFLGTCRGQSMHQVLRDPCVLRKQLLYGVC KTLFDTITVRRVAEEWKLHAALFPYRALDEEDLEQYLLVWSASLRQSVQTGVLGALRD ILYQYADNDDYGLYVDWCVTVGLVPLLDVKTKPSEAAERAQFVRAAVQRATETHPLAQ DLLQANLALLLQVAERLGAVRIANAPEVRVFKKVRSERLEAQLRGKHIRLYVAAEPLA YERDKLLFTTPVAHLHEEILRYDGLCRHQKICQLLNTFPVKVVTASRHELNCKKLVEM MEQHDRGSDAKKSIMKFLLNVSDSKSRIGIEDSVESFLQDLTPSLVDQNRLLPARGPG …
160812^160813	Insertion	-	AA	0.0450775	7	13	53.8462	3	17	17.6471		-
162542	SNV	C	G	0.0397373	5	13	38.4615	1	17	5.88235	AAR31657.1:p.Ala209Gly	Yes	UL112	HHV5wtgp099	involved in gene regulation; involved in DNA replication	protein UL112	AAR31657.1	GI:39842113	MDLPTTVVRKYWTFTNPNRILHQSVNQTFDVRQFVFDNARLVNC VDGDGKVLHLNKGWLCATIMQHGEASAGAKTQQGFMSIDITGDGELQEHLFVRGGIVF NKSVSSVVGSSGPNESALLTMISENGNLQVTYVRHYLKNHGESSGGGGGCGAASTASA VCVSSLGGSGGTRDGPSAEEQQRRRQEQRHEERRKKSSSSAGGGGGGGASGGGGGGGS GGQHSSDSANGLLRDPRLMNRQKERRPPPSSENDGSPPLREAKRQKTTAQHEGHGGGG KNETEQQSGGAGGGGGGGSGRMSLPLDTSEAVAFLNYSSSSSAVSSSSNNHHHHHHHH NAVTDVAAGTDGALLLPIERGAVVSSPSSTSPSSLLSLPRPSSAHSAGETVQESEAAA …
164134	SNV	A	C	0.0434227	13	13	100	12	17	70.5882		-
164153	SNV	T	A	0.0415003	8	13	61.5385	4	17	23.5294		-
164266	SNV	C	T	0.0354823	9	13	69.2308	5	17	29.4118		-
164316	SNV	G	A	0.0178911	8	13	61.5385	3	17	17.6471		No	UL114	HHV5wtgp100	involved in DNA repair	uracil-DNA glycosylase	AAR31658.1	GI:39842114	MALKQWMLANIADNKGSLLTPDEQARVFCLSADWIRFLSLPDHD TVLLRDTVAAVEGARQLEMVYPAPEHVHRWSYLCPPEQVRVVIVGQDPYCDGSASGLA FGTLAGRPPPPSLNNVFRELARTVDGFQRPASGCLDAWARRGVLLLNTVFTVVHGQPG SHRHLGWQTLSNHVIRRLSERREHLVFMLWGADAHTCEYLIDRRRHLVLKSCHPSPRN TTRAFVGNDHFILANAYLDTHYRETMDWRLCG
164391	SNV	G	A	0.0178911	8	13	61.5385	3	17	17.6471		No	UL114	HHV5wtgp100	involved in DNA repair	uracil-DNA glycosylase	AAR31658.1	GI:39842114	MALKQWMLANIADNKGSLLTPDEQARVFCLSADWIRFLSLPDHD TVLLRDTVAAVEGARQLEMVYPAPEHVHRWSYLCPPEQVRVVIVGQDPYCDGSASGLA FGTLAGRPPPPSLNNVFRELARTVDGFQRPASGCLDAWARRGVLLLNTVFTVVHGQPG SHRHLGWQTLSNHVIRRLSERREHLVFMLWGADAHTCEYLIDRRRHLVLKSCHPSPRN TTRAFVGNDHFILANAYLDTHYRETMDWRLCG
164615	SNV	G	A	0.0178911	8	13	61.5385	3	17	17.6471		No	UL114	HHV5wtgp100	involved in DNA repair	uracil-DNA glycosylase	AAR31658.1	GI:39842114	MALKQWMLANIADNKGSLLTPDEQARVFCLSADWIRFLSLPDHD TVLLRDTVAAVEGARQLEMVYPAPEHVHRWSYLCPPEQVRVVIVGQDPYCDGSASGLA FGTLAGRPPPPSLNNVFRELARTVDGFQRPASGCLDAWARRGVLLLNTVFTVVHGQPG SHRHLGWQTLSNHVIRRLSERREHLVFMLWGADAHTCEYLIDRRRHLVLKSCHPSPRN TTRAFVGNDHFILANAYLDTHYRETMDWRLCG
164658	SNV	A	G	0.0415003	8	13	61.5385	4	17	23.5294		No	UL114	HHV5wtgp100	involved in DNA repair	uracil-DNA glycosylase	AAR31658.1	GI:39842114	MALKQWMLANIADNKGSLLTPDEQARVFCLSADWIRFLSLPDHD TVLLRDTVAAVEGARQLEMVYPAPEHVHRWSYLCPPEQVRVVIVGQDPYCDGSASGLA FGTLAGRPPPPSLNNVFRELARTVDGFQRPASGCLDAWARRGVLLLNTVFTVVHGQPG SHRHLGWQTLSNHVIRRLSERREHLVFMLWGADAHTCEYLIDRRRHLVLKSCHPSPRN TTRAFVGNDHFILANAYLDTHYRETMDWRLCG
164706	SNV	G	T	0.00623974	8	13	61.5385	2	17	11.7647		No	UL114	HHV5wtgp100	involved in DNA repair	uracil-DNA glycosylase	AAR31658.1	GI:39842114	MALKQWMLANIADNKGSLLTPDEQARVFCLSADWIRFLSLPDHD TVLLRDTVAAVEGARQLEMVYPAPEHVHRWSYLCPPEQVRVVIVGQDPYCDGSASGLA FGTLAGRPPPPSLNNVFRELARTVDGFQRPASGCLDAWARRGVLLLNTVFTVVHGQPG SHRHLGWQTLSNHVIRRLSERREHLVFMLWGADAHTCEYLIDRRRHLVLKSCHPSPRN TTRAFVGNDHFILANAYLDTHYRETMDWRLCG
164850	SNV	T	C	0.0415003	8	13	61.5385	4	17	23.5294		No	UL114	HHV5wtgp100	involved in DNA repair	uracil-DNA glycosylase	AAR31658.1	GI:39842114	MALKQWMLANIADNKGSLLTPDEQARVFCLSADWIRFLSLPDHD TVLLRDTVAAVEGARQLEMVYPAPEHVHRWSYLCPPEQVRVVIVGQDPYCDGSASGLA FGTLAGRPPPPSLNNVFRELARTVDGFQRPASGCLDAWARRGVLLLNTVFTVVHGQPG SHRHLGWQTLSNHVIRRLSERREHLVFMLWGADAHTCEYLIDRRRHLVLKSCHPSPRN TTRAFVGNDHFILANAYLDTHYRETMDWRLCG
165736	SNV	C	T	0.0415003	8	13	61.5385	4	17	23.5294		No	UL115	HHV5wtgp101	contains signal peptide; complexed with envelope glycoprotein H; involved in cell entry; involved in cell-to-cell spread	envelope glycoprotein L	AAR31659.1	GI:39842115	MCRRPDCGFSFSPGPVILLWCCLLLPIVSSAAVSVAPTAAEKVP AECPELTRRCLLGEVFEGDKYESWLRPLVNVTGRDGPLSQLIRYRPVTPEAANSVLLD EAFLDTLALLYNNPDQLRALLTLLSSDTAPRWMTVMRGYSECGDGSPAVYTCVDDLCR GYDLTRLSYGRSIFTEHVLGFELVPPSLFNVVVAIRNEATRTNRAVRLPVSTAAAPEG ITLFYGLYNAVKEFCLRHQLDPPLLRHLDKYYAGLPPELKQTRVNLPAHSRYGPQAVD AR
165832	SNV	G	T	0.0415003	8	13	61.5385	4	17	23.5294	AAR31659.1:p.Phe9Leu	Yes	UL115	HHV5wtgp101	contains signal peptide; complexed with envelope glycoprotein H; involved in cell entry; involved in cell-to-cell spread	envelope glycoprotein L	AAR31659.1	GI:39842115	MCRRPDCGFSFSPGPVILLWCCLLLPIVSSAAVSVAPTAAEKVP AECPELTRRCLLGEVFEGDKYESWLRPLVNVTGRDGPLSQLIRYRPVTPEAANSVLLD EAFLDTLALLYNNPDQLRALLTLLSSDTAPRWMTVMRGYSECGDGSPAVYTCVDDLCR GYDLTRLSYGRSIFTEHVLGFELVPPSLFNVVVAIRNEATRTNRAVRLPVSTAAAPEG ITLFYGLYNAVKEFCLRHQLDPPLLRHLDKYYAGLPPELKQTRVNLPAHSRYGPQAVD AR
166104	SNV	C	A	0.0415003	8	13	61.5385	4	17	23.5294		No	UL116	HHV5wtgp102	contains signal peptide	protein UL116	AAR31660.1	GI:39842116	MKRRRRWRGWLLFLALCFCLLCEAVETNATTVTSTTAAAATTNT TVATTGTTTTSPNVTSTTSNTVTTPTTVSSVSNLTSSATSILISTSTVSGTRNTRNNN TTTIGTNATSPSSSVSILTTVTPAATSTTSNNGDVTSDYTPTFDLENITTTRAPTRPP AQDLCSHNLSIILYEEESQSSVDIAVDEEEPELEDDDEYDELWFPLYFEAECNLNYTL QYVNHSCDYSVRQSSVSFPPWRDIDSVTFVPRNLSNCSAHGLAVIVAGNQTWYVNPFS LAHLLDAIYNVLGIEDLSANFWRQLAPYRHTLIVPQT
166511..166513	Deletion	TTC	-	0.0415003	8	13	61.5385	4	17	23.5294	AAR31660.1:p.Arg96del	Yes	UL116	HHV5wtgp102	contains signal peptide	protein UL116	AAR31660.1	GI:39842116	MKRRRRWRGWLLFLALCFCLLCEAVETNATTVTSTTAAAATTNT TVATTGTTTTSPNVTSTTSNTVTTPTTVSSVSNLTSSATSILISTSTVSGTRNTRNNN TTTIGTNATSPSSSVSILTTVTPAATSTTSNNGDVTSDYTPTFDLENITTTRAPTRPP AQDLCSHNLSIILYEEESQSSVDIAVDEEEPELEDDDEYDELWFPLYFEAECNLNYTL QYVNHSCDYSVRQSSVSFPPWRDIDSVTFVPRNLSNCSAHGLAVIVAGNQTWYVNPFS LAHLLDAIYNVLGIEDLSANFWRQLAPYRHTLIVPQT
166715..166716	MNV	CG	TA	0.0415003	8	13	61.5385	4	17	23.5294	AAR31660.1:p.Ala29Thr	Yes	UL116	HHV5wtgp102	contains signal peptide	protein UL116	AAR31660.1	GI:39842116	MKRRRRWRGWLLFLALCFCLLCEAVETNATTVTSTTAAAATTNT TVATTGTTTTSPNVTSTTSNTVTTPTTVSSVSNLTSSATSILISTSTVSGTRNTRNNN TTTIGTNATSPSSSVSILTTVTPAATSTTSNNGDVTSDYTPTFDLENITTTRAPTRPP AQDLCSHNLSIILYEEESQSSVDIAVDEEEPELEDDDEYDELWFPLYFEAECNLNYTL QYVNHSCDYSVRQSSVSFPPWRDIDSVTFVPRNLSNCSAHGLAVIVAGNQTWYVNPFS LAHLLDAIYNVLGIEDLSANFWRQLAPYRHTLIVPQT
167315	SNV	C	T	0.0450775	6	13	46.1538	2	17	11.7647		No	UL117	HHV5wtgp103		protein UL117	AAR31661.1	GI:39842117	MVMFSQDHVQIVYGSTRICKSLAPANKRKTHRTIVVAPRRGFLR IPPDGQDVNHVKIVPTTTSSSLAPPRDDERRPTPPLRPPLTVYPYGTSLIRRSARDAK LRSKLIVFHITRPALGQHPQNPGISGPAAMDHSEFLTSFRREVDRQTVLTAESAPATV EVCLGDALPGGVMGGGGLPAGVGSASAAVAAAAAAVAGVPVAANPVMPATATVTTPPM IDLTSHHRPLTLFTPASAAAAPAVATNGGNATYILPADCRYAPLFASKYKYVFEEVSR LMRLHDSTAVQLQISASCGNAFQALKSALLKLHNVTVLAGQQLITQTMPHTPQAVATF KFFHQDPNRVLDCIRPVVPRSTSYHETGVYQMWVSGATKKDLFDAVTLCASIVEKQPD …
167405	SNV	G	A	0.0151724	6	13	46.1538	1	17	5.88235		No	UL117	HHV5wtgp103		protein UL117	AAR31661.1	GI:39842117	MVMFSQDHVQIVYGSTRICKSLAPANKRKTHRTIVVAPRRGFLR IPPDGQDVNHVKIVPTTTSSSLAPPRDDERRPTPPLRPPLTVYPYGTSLIRRSARDAK LRSKLIVFHITRPALGQHPQNPGISGPAAMDHSEFLTSFRREVDRQTVLTAESAPATV EVCLGDALPGGVMGGGGLPAGVGSASAAVAAAAAAVAGVPVAANPVMPATATVTTPPM IDLTSHHRPLTLFTPASAAAAPAVATNGGNATYILPADCRYAPLFASKYKYVFEEVSR LMRLHDSTAVQLQISASCGNAFQALKSALLKLHNVTVLAGQQLITQTMPHTPQAVATF KFFHQDPNRVLDCIRPVVPRSTSYHETGVYQMWVSGATKKDLFDAVTLCASIVEKQPD …
167855	SNV	T	C	0.0473497	12	13	92.3077	10	17	58.8235		No	UL117	HHV5wtgp103		protein UL117	AAR31661.1	GI:39842117	MVMFSQDHVQIVYGSTRICKSLAPANKRKTHRTIVVAPRRGFLR IPPDGQDVNHVKIVPTTTSSSLAPPRDDERRPTPPLRPPLTVYPYGTSLIRRSARDAK LRSKLIVFHITRPALGQHPQNPGISGPAAMDHSEFLTSFRREVDRQTVLTAESAPATV EVCLGDALPGGVMGGGGLPAGVGSASAAVAAAAAAVAGVPVAANPVMPATATVTTPPM IDLTSHHRPLTLFTPASAAAAPAVATNGGNATYILPADCRYAPLFASKYKYVFEEVSR LMRLHDSTAVQLQISASCGNAFQALKSALLKLHNVTVLAGQQLITQTMPHTPQAVATF KFFHQDPNRVLDCIRPVVPRSTSYHETGVYQMWVSGATKKDLFDAVTLCASIVEKQPD …
167918	SNV	A	G	0.0237881	12	13	92.3077	9	17	52.9412		No	UL117	HHV5wtgp103		protein UL117	AAR31661.1	GI:39842117	MVMFSQDHVQIVYGSTRICKSLAPANKRKTHRTIVVAPRRGFLR IPPDGQDVNHVKIVPTTTSSSLAPPRDDERRPTPPLRPPLTVYPYGTSLIRRSARDAK LRSKLIVFHITRPALGQHPQNPGISGPAAMDHSEFLTSFRREVDRQTVLTAESAPATV EVCLGDALPGGVMGGGGLPAGVGSASAAVAAAAAAVAGVPVAANPVMPATATVTTPPM IDLTSHHRPLTLFTPASAAAAPAVATNGGNATYILPADCRYAPLFASKYKYVFEEVSR LMRLHDSTAVQLQISASCGNAFQALKSALLKLHNVTVLAGQQLITQTMPHTPQAVATF KFFHQDPNRVLDCIRPVVPRSTSYHETGVYQMWVSGATKKDLFDAVTLCASIVEKQPD …
168142	SNV	G	A	0.0450775	6	13	46.1538	2	17	11.7647		-
168176	SNV	G	T	0.0450775	6	13	46.1538	2	17	11.7647		-
168181	SNV	G	A	0.0450775	6	13	46.1538	2	17	11.7647		-
168231	SNV	G	A	0.0450775	6	13	46.1538	2	17	11.7647		No	UL119	HHV5wtgp104	type 1 membrane protein; IgG Fc-binding; similar to OX-2; involved in immune regulation; possibly related to UL120 family	membrane glycoprotein UL119	AAR31662.1	GI:39842118	MCSVLAIALVVALLGDMHPGVKSSTTSAVTSPSNTTVTSTTSIS TSNNVSSAVTTTVQTSTSSASTSVIATTQKEGHLYTVNCEASYSYDQVSLNATCKVIL LNNTKNPDILSVTCYARTDCKGPFTQVGYLSAFPSNDKGKLHLSYNATAQELLISGLR PQETTEYTCSFFSWGRHHNATWDLFTYPIYAVYGTRLNATTMRVRVLLQEHEHCLLNG SSLYHPNSTVHLHQGDQLIPPWNISNVTYNGQRLREFVFYLNGTYTVVRLHVQIAGRS FTTTYVFIKSDPLFEDRLLAYGVLAFLVFMVIILLYVTYMLARRRDWSYKRLEEPVEE KKHPVPYFKQW
168285	SNV	C	T	0.0450775	6	13	46.1538	2	17	11.7647		No	UL119	HHV5wtgp104	type 1 membrane protein; IgG Fc-binding; similar to OX-2; involved in immune regulation; possibly related to UL120 family	membrane glycoprotein UL119	AAR31662.1	GI:39842118	MCSVLAIALVVALLGDMHPGVKSSTTSAVTSPSNTTVTSTTSIS TSNNVSSAVTTTVQTSTSSASTSVIATTQKEGHLYTVNCEASYSYDQVSLNATCKVIL LNNTKNPDILSVTCYARTDCKGPFTQVGYLSAFPSNDKGKLHLSYNATAQELLISGLR PQETTEYTCSFFSWGRHHNATWDLFTYPIYAVYGTRLNATTMRVRVLLQEHEHCLLNG SSLYHPNSTVHLHQGDQLIPPWNISNVTYNGQRLREFVFYLNGTYTVVRLHVQIAGRS FTTTYVFIKSDPLFEDRLLAYGVLAFLVFMVIILLYVTYMLARRRDWSYKRLEEPVEE KKHPVPYFKQW
168744	SNV	C	T	0.0450775	6	13	46.1538	2	17	11.7647		No	UL119	HHV5wtgp104	type 1 membrane protein; IgG Fc-binding; similar to OX-2; involved in immune regulation; possibly related to UL120 family	membrane glycoprotein UL119	AAR31662.1	GI:39842118	MCSVLAIALVVALLGDMHPGVKSSTTSAVTSPSNTTVTSTTSIS TSNNVSSAVTTTVQTSTSSASTSVIATTQKEGHLYTVNCEASYSYDQVSLNATCKVIL LNNTKNPDILSVTCYARTDCKGPFTQVGYLSAFPSNDKGKLHLSYNATAQELLISGLR PQETTEYTCSFFSWGRHHNATWDLFTYPIYAVYGTRLNATTMRVRVLLQEHEHCLLNG SSLYHPNSTVHLHQGDQLIPPWNISNVTYNGQRLREFVFYLNGTYTVVRLHVQIAGRS FTTTYVFIKSDPLFEDRLLAYGVLAFLVFMVIILLYVTYMLARRRDWSYKRLEEPVEE KKHPVPYFKQW
168822..168823	MNV	GT	AC	0.0450775	7	13	53.8462	3	17	17.6471		-
168837..168838	MNV	AG	GT	0.0450775	7	13	53.8462	3	17	17.6471		-
168845	SNV	G	A	0.0450775	7	13	53.8462	3	17	17.6471		-
168849	SNV	A	G	0.0278761	10	13	76.9231	6	17	35.2941		-
168864..168865	Replacement	CA	T	0.0450775	7	13	53.8462	3	17	17.6471		-
168867	SNV	A	G	0.0450775	7	13	53.8462	3	17	17.6471		-
168870	SNV	A	G	0.0450775	7	13	53.8462	3	17	17.6471		-
168937	SNV	G	A	0.0450775	7	13	53.8462	3	17	17.6471		No	UL119	HHV5wtgp104	type 1 membrane protein; IgG Fc-binding; similar to OX-2; involved in immune regulation; possibly related to UL120 family	membrane glycoprotein UL119	AAR31662.1	GI:39842118	MCSVLAIALVVALLGDMHPGVKSSTTSAVTSPSNTTVTSTTSIS TSNNVSSAVTTTVQTSTSSASTSVIATTQKEGHLYTVNCEASYSYDQVSLNATCKVIL LNNTKNPDILSVTCYARTDCKGPFTQVGYLSAFPSNDKGKLHLSYNATAQELLISGLR PQETTEYTCSFFSWGRHHNATWDLFTYPIYAVYGTRLNATTMRVRVLLQEHEHCLLNG SSLYHPNSTVHLHQGDQLIPPWNISNVTYNGQRLREFVFYLNGTYTVVRLHVQIAGRS FTTTYVFIKSDPLFEDRLLAYGVLAFLVFMVIILLYVTYMLARRRDWSYKRLEEPVEE KKHPVPYFKQW
169010	SNV	A	T	0.0450775	7	13	53.8462	3	17	17.6471	AAR31662.1:p.Ile101Asn	Yes	UL119	HHV5wtgp104	type 1 membrane protein; IgG Fc-binding; similar to OX-2; involved in immune regulation; possibly related to UL120 family	membrane glycoprotein UL119	AAR31662.1	GI:39842118	MCSVLAIALVVALLGDMHPGVKSSTTSAVTSPSNTTVTSTTSIS TSNNVSSAVTTTVQTSTSSASTSVIATTQKEGHLYTVNCEASYSYDQVSLNATCKVIL LNNTKNPDILSVTCYARTDCKGPFTQVGYLSAFPSNDKGKLHLSYNATAQELLISGLR PQETTEYTCSFFSWGRHHNATWDLFTYPIYAVYGTRLNATTMRVRVLLQEHEHCLLNG SSLYHPNSTVHLHQGDQLIPPWNISNVTYNGQRLREFVFYLNGTYTVVRLHVQIAGRS FTTTYVFIKSDPLFEDRLLAYGVLAFLVFMVIILLYVTYMLARRRDWSYKRLEEPVEE KKHPVPYFKQW
169030	SNV	T	C	0.0450775	7	13	53.8462	3	17	17.6471		No	UL119	HHV5wtgp104	type 1 membrane protein; IgG Fc-binding; similar to OX-2; involved in immune regulation; possibly related to UL120 family	membrane glycoprotein UL119	AAR31662.1	GI:39842118	MCSVLAIALVVALLGDMHPGVKSSTTSAVTSPSNTTVTSTTSIS TSNNVSSAVTTTVQTSTSSASTSVIATTQKEGHLYTVNCEASYSYDQVSLNATCKVIL LNNTKNPDILSVTCYARTDCKGPFTQVGYLSAFPSNDKGKLHLSYNATAQELLISGLR PQETTEYTCSFFSWGRHHNATWDLFTYPIYAVYGTRLNATTMRVRVLLQEHEHCLLNG SSLYHPNSTVHLHQGDQLIPPWNISNVTYNGQRLREFVFYLNGTYTVVRLHVQIAGRS FTTTYVFIKSDPLFEDRLLAYGVLAFLVFMVIILLYVTYMLARRRDWSYKRLEEPVEE KKHPVPYFKQW
169073	SNV	G	T	0.0450775	7	13	53.8462	3	17	17.6471	AAR31662.1:p.Thr80Asn	Yes	UL119	HHV5wtgp104	type 1 membrane protein; IgG Fc-binding; similar to OX-2; involved in immune regulation; possibly related to UL120 family	membrane glycoprotein UL119	AAR31662.1	GI:39842118	MCSVLAIALVVALLGDMHPGVKSSTTSAVTSPSNTTVTSTTSIS TSNNVSSAVTTTVQTSTSSASTSVIATTQKEGHLYTVNCEASYSYDQVSLNATCKVIL LNNTKNPDILSVTCYARTDCKGPFTQVGYLSAFPSNDKGKLHLSYNATAQELLISGLR PQETTEYTCSFFSWGRHHNATWDLFTYPIYAVYGTRLNATTMRVRVLLQEHEHCLLNG SSLYHPNSTVHLHQGDQLIPPWNISNVTYNGQRLREFVFYLNGTYTVVRLHVQIAGRS FTTTYVFIKSDPLFEDRLLAYGVLAFLVFMVIILLYVTYMLARRRDWSYKRLEEPVEE KKHPVPYFKQW
169104	SNV	C	T	0.0450775	7	13	53.8462	3	17	17.6471	AAR31662.1:p.Ala70Thr	Yes	UL119	HHV5wtgp104	type 1 membrane protein; IgG Fc-binding; similar to OX-2; involved in immune regulation; possibly related to UL120 family	membrane glycoprotein UL119	AAR31662.1	GI:39842118	MCSVLAIALVVALLGDMHPGVKSSTTSAVTSPSNTTVTSTTSIS TSNNVSSAVTTTVQTSTSSASTSVIATTQKEGHLYTVNCEASYSYDQVSLNATCKVIL LNNTKNPDILSVTCYARTDCKGPFTQVGYLSAFPSNDKGKLHLSYNATAQELLISGLR PQETTEYTCSFFSWGRHHNATWDLFTYPIYAVYGTRLNATTMRVRVLLQEHEHCLLNG SSLYHPNSTVHLHQGDQLIPPWNISNVTYNGQRLREFVFYLNGTYTVVRLHVQIAGRS FTTTYVFIKSDPLFEDRLLAYGVLAFLVFMVIILLYVTYMLARRRDWSYKRLEEPVEE KKHPVPYFKQW
169279	SNV	A	G	0.0415003	8	13	61.5385	4	17	23.5294		No	UL119	HHV5wtgp104	type 1 membrane protein; IgG Fc-binding; similar to OX-2; involved in immune regulation; possibly related to UL120 family	membrane glycoprotein UL119	AAR31662.1	GI:39842118	MCSVLAIALVVALLGDMHPGVKSSTTSAVTSPSNTTVTSTTSIS TSNNVSSAVTTTVQTSTSSASTSVIATTQKEGHLYTVNCEASYSYDQVSLNATCKVIL LNNTKNPDILSVTCYARTDCKGPFTQVGYLSAFPSNDKGKLHLSYNATAQELLISGLR PQETTEYTCSFFSWGRHHNATWDLFTYPIYAVYGTRLNATTMRVRVLLQEHEHCLLNG SSLYHPNSTVHLHQGDQLIPPWNISNVTYNGQRLREFVFYLNGTYTVVRLHVQIAGRS FTTTYVFIKSDPLFEDRLLAYGVLAFLVFMVIILLYVTYMLARRRDWSYKRLEEPVEE KKHPVPYFKQW
169511	SNV	C	T	0.0395659	11	13	84.6154	8	17	47.0588	AAR31663.1:p.Ser154Asn	Yes	UL120	HHV5wtgp105	type 1 membrane protein; UL120 family	membrane protein UL120	AAR31663.1	GI:39842119	MYRAGVTLLVVAVVSFGRWDSVTVATTIRVGWWYEPQVKMAYIY EHNDTNLTIFCNTTAYDSPFLASGMMIVLPHRTQFLTRKVNYSEDMENIKQNYTHQLT HMLTGEPGTYVNGSVTCWGSNGTFGAGTFIVRSMVNKTAGNTNTFIHFVEDSELVENP AYFRRSDHRAFMIVILTQVVFVVFIINASFIWSWTFRRHKR
169513	SNV	A	C	0.0395659	11	13	84.6154	8	17	47.0588	AAR31663.1:p.Asp153Glu	Yes	UL120	HHV5wtgp105	type 1 membrane protein; UL120 family	membrane protein UL120	AAR31663.1	GI:39842119	MYRAGVTLLVVAVVSFGRWDSVTVATTIRVGWWYEPQVKMAYIY EHNDTNLTIFCNTTAYDSPFLASGMMIVLPHRTQFLTRKVNYSEDMENIKQNYTHQLT HMLTGEPGTYVNGSVTCWGSNGTFGAGTFIVRSMVNKTAGNTNTFIHFVEDSELVENP AYFRRSDHRAFMIVILTQVVFVVFIINASFIWSWTFRRHKR
169538	SNV	T	C	0.0434227	13	13	100	12	17	70.5882	AAR31663.1:p.Asn145Ser	Yes	UL120	HHV5wtgp105	type 1 membrane protein; UL120 family	membrane protein UL120	AAR31663.1	GI:39842119	MYRAGVTLLVVAVVSFGRWDSVTVATTIRVGWWYEPQVKMAYIY EHNDTNLTIFCNTTAYDSPFLASGMMIVLPHRTQFLTRKVNYSEDMENIKQNYTHQLT HMLTGEPGTYVNGSVTCWGSNGTFGAGTFIVRSMVNKTAGNTNTFIHFVEDSELVENP AYFRRSDHRAFMIVILTQVVFVVFIINASFIWSWTFRRHKR
169598	Deletion	G	-	0.0090312	5	13	38.4615	0	17	0	AAR31663.1:p.Thr125fs	Yes	UL120	HHV5wtgp105	type 1 membrane protein; UL120 family	membrane protein UL120	AAR31663.1	GI:39842119	MYRAGVTLLVVAVVSFGRWDSVTVATTIRVGWWYEPQVKMAYIY EHNDTNLTIFCNTTAYDSPFLASGMMIVLPHRTQFLTRKVNYSEDMENIKQNYTHQLT HMLTGEPGTYVNGSVTCWGSNGTFGAGTFIVRSMVNKTAGNTNTFIHFVEDSELVENP AYFRRSDHRAFMIVILTQVVFVVFIINASFIWSWTFRRHKR
169689..169691	MNV	GTT	TCC	0.0415003	8	13	61.5385	4	17	23.5294	AAR31663.1:p.Lys94_Gln95delinsArgLys	Yes	UL120	HHV5wtgp105	type 1 membrane protein; UL120 family	membrane protein UL120	AAR31663.1	GI:39842119	MYRAGVTLLVVAVVSFGRWDSVTVATTIRVGWWYEPQVKMAYIY EHNDTNLTIFCNTTAYDSPFLASGMMIVLPHRTQFLTRKVNYSEDMENIKQNYTHQLT HMLTGEPGTYVNGSVTCWGSNGTFGAGTFIVRSMVNKTAGNTNTFIHFVEDSELVENP AYFRRSDHRAFMIVILTQVVFVVFIINASFIWSWTFRRHKR
169711	SNV	G	A	0.0415003	8	13	61.5385	4	17	23.5294		No	UL120	HHV5wtgp105	type 1 membrane protein; UL120 family	membrane protein UL120	AAR31663.1	GI:39842119	MYRAGVTLLVVAVVSFGRWDSVTVATTIRVGWWYEPQVKMAYIY EHNDTNLTIFCNTTAYDSPFLASGMMIVLPHRTQFLTRKVNYSEDMENIKQNYTHQLT HMLTGEPGTYVNGSVTCWGSNGTFGAGTFIVRSMVNKTAGNTNTFIHFVEDSELVENP AYFRRSDHRAFMIVILTQVVFVVFIINASFIWSWTFRRHKR
169750	SNV	C	T	0.0415003	8	13	61.5385	4	17	23.5294		No	UL120	HHV5wtgp105	type 1 membrane protein; UL120 family	membrane protein UL120	AAR31663.1	GI:39842119	MYRAGVTLLVVAVVSFGRWDSVTVATTIRVGWWYEPQVKMAYIY EHNDTNLTIFCNTTAYDSPFLASGMMIVLPHRTQFLTRKVNYSEDMENIKQNYTHQLT HMLTGEPGTYVNGSVTCWGSNGTFGAGTFIVRSMVNKTAGNTNTFIHFVEDSELVENP AYFRRSDHRAFMIVILTQVVFVVFIINASFIWSWTFRRHKR
169755	SNV	G	T	0.0415003	8	13	61.5385	4	17	23.5294	AAR31663.1:p.Leu73Ile	Yes	UL120	HHV5wtgp105	type 1 membrane protein; UL120 family	membrane protein UL120	AAR31663.1	GI:39842119	MYRAGVTLLVVAVVSFGRWDSVTVATTIRVGWWYEPQVKMAYIY EHNDTNLTIFCNTTAYDSPFLASGMMIVLPHRTQFLTRKVNYSEDMENIKQNYTHQLT HMLTGEPGTYVNGSVTCWGSNGTFGAGTFIVRSMVNKTAGNTNTFIHFVEDSELVENP AYFRRSDHRAFMIVILTQVVFVVFIINASFIWSWTFRRHKR
169757..169758	MNV	AC	CT	0.0415003	8	13	61.5385	4	17	23.5294	AAR31663.1:p.Val72Ser	Yes	UL120	HHV5wtgp105	type 1 membrane protein; UL120 family	membrane protein UL120	AAR31663.1	GI:39842119	MYRAGVTLLVVAVVSFGRWDSVTVATTIRVGWWYEPQVKMAYIY EHNDTNLTIFCNTTAYDSPFLASGMMIVLPHRTQFLTRKVNYSEDMENIKQNYTHQLT HMLTGEPGTYVNGSVTCWGSNGTFGAGTFIVRSMVNKTAGNTNTFIHFVEDSELVENP AYFRRSDHRAFMIVILTQVVFVVFIINASFIWSWTFRRHKR
171484	SNV	G	A	0.0450775	6	13	46.1538	2	17	11.7647		No	UL122	HHV5wtgp107	interacts with basal transcriptional machinery and cellular transcription factors; specific DNA-binding protein; involved in gene regulation	regulatory protein IE2	AAR31665.1	GI:39842121	MESSAKRKMDPDNPDEGPSSKVPRPETPVTKATTFLQTMLRKEV NSQLSLGDPLFPELAEESLKTFEQVTEDCNENPEKDVLTELGDILAQAVNHAGIDSSS TGPTLTTHSCSVSSAPLNKPTPTSVAVTNTPLPGASATPELSPRKKPRKTTRPFKVII KPPVPPAPIMLPLIKQEDIKPEPDFTIQYRNKIIDTAGCIVISDSEEEQGEEVETRGA TASSPSTGSGTPRVTSPTHPLSQMNHPPLPDPLGRPDEDSSSSSSSSCSSASDSESES EEMKCSSGGGASVTSSHHGRGGFGGAASSSLLSCGHQSSGGASTGPRKKKSKRISELD NEKVRNIMKDKNTPFCTPNVQTRRGRVKIDEVSRMFRHTNRSLEYKNLPFMIPSMHQV …
171513	SNV	G	A	0.0450775	6	13	46.1538	2	17	11.7647		No	UL122	HHV5wtgp107	interacts with basal transcriptional machinery and cellular transcription factors; specific DNA-binding protein; involved in gene regulation	regulatory protein IE2	AAR31665.1	GI:39842121	MESSAKRKMDPDNPDEGPSSKVPRPETPVTKATTFLQTMLRKEV NSQLSLGDPLFPELAEESLKTFEQVTEDCNENPEKDVLTELGDILAQAVNHAGIDSSS TGPTLTTHSCSVSSAPLNKPTPTSVAVTNTPLPGASATPELSPRKKPRKTTRPFKVII KPPVPPAPIMLPLIKQEDIKPEPDFTIQYRNKIIDTAGCIVISDSEEEQGEEVETRGA TASSPSTGSGTPRVTSPTHPLSQMNHPPLPDPLGRPDEDSSSSSSSSCSSASDSESES EEMKCSSGGGASVTSSHHGRGGFGGAASSSLLSCGHQSSGGASTGPRKKKSKRISELD NEKVRNIMKDKNTPFCTPNVQTRRGRVKIDEVSRMFRHTNRSLEYKNLPFMIPSMHQV …
172320^172321	Insertion	-	AC	0.0450775	6	13	46.1538	2	17	11.7647		-
172476	SNV	C	A	0.0450775	6	13	46.1538	2	17	11.7647		No	UL123	HHV5wtgp108	enhances activation by IE2; interacts with basal transcriptional machinery and cellular transcription factor; disrupts ND10; involved in gene regulation	regulatory protein IE1	AAR31666.1	GI:39842122	MESSAKRKMDPDNPDEGPSSKVPRPETPVTKATTFLQTMLRKEV NSQLSLGDPLFPELAEESLKTFEQVTEDCNENPEKDVLTELVKQIKVRVDMVRHRIKE HMLKKYTQTEEKFTGAFNMMGGCLQNALDILDKVHEPFEDMKCIGLTMQSMYENYIVP EDKREMWMACIKELHDVSKGAANKLGGALQAKARAKKDELRRKMMYMCYRNIEFFTKN SAFPKTTNGCSQAMAALQNLPQCSPDEIMSYAQKIFKILDEERDKVLTHIDHIFMDIL TTCVETMCNEYKVTSDACMMTMYGGISLLSEFCRVLCCYVLEETSVMLAKRPLITKPE VISVMKRRIEEICMKVFAQYILGADPLRVCSPSVDDLRAIAEESDEEEAIVAYTLATA …
172502	SNV	G	C	0.0159236	9	13	69.2308	4	17	23.5294	AAR31666.1:p.Gln435Glu	Yes	UL123	HHV5wtgp108	enhances activation by IE2; interacts with basal transcriptional machinery and cellular transcription factor; disrupts ND10; involved in gene regulation	regulatory protein IE1	AAR31666.1	GI:39842122	MESSAKRKMDPDNPDEGPSSKVPRPETPVTKATTFLQTMLRKEV NSQLSLGDPLFPELAEESLKTFEQVTEDCNENPEKDVLTELVKQIKVRVDMVRHRIKE HMLKKYTQTEEKFTGAFNMMGGCLQNALDILDKVHEPFEDMKCIGLTMQSMYENYIVP EDKREMWMACIKELHDVSKGAANKLGGALQAKARAKKDELRRKMMYMCYRNIEFFTKN SAFPKTTNGCSQAMAALQNLPQCSPDEIMSYAQKIFKILDEERDKVLTHIDHIFMDIL TTCVETMCNEYKVTSDACMMTMYGGISLLSEFCRVLCCYVLEETSVMLAKRPLITKPE VISVMKRRIEEICMKVFAQYILGADPLRVCSPSVDDLRAIAEESDEEEAIVAYTLATA …
173046	SNV	G	T	0.0415003	8	13	61.5385	4	17	23.5294		No	UL123	HHV5wtgp108	enhances activation by IE2; interacts with basal transcriptional machinery and cellular transcription factor; disrupts ND10; involved in gene regulation	regulatory protein IE1	AAR31666.1	GI:39842122	MESSAKRKMDPDNPDEGPSSKVPRPETPVTKATTFLQTMLRKEV NSQLSLGDPLFPELAEESLKTFEQVTEDCNENPEKDVLTELVKQIKVRVDMVRHRIKE HMLKKYTQTEEKFTGAFNMMGGCLQNALDILDKVHEPFEDMKCIGLTMQSMYENYIVP EDKREMWMACIKELHDVSKGAANKLGGALQAKARAKKDELRRKMMYMCYRNIEFFTKN SAFPKTTNGCSQAMAALQNLPQCSPDEIMSYAQKIFKILDEERDKVLTHIDHIFMDIL TTCVETMCNEYKVTSDACMMTMYGGISLLSEFCRVLCCYVLEETSVMLAKRPLITKPE VISVMKRRIEEICMKVFAQYILGADPLRVCSPSVDDLRAIAEESDEEEAIVAYTLATA …
173828	SNV	G	A	0.0415003	8	13	61.5385	4	17	23.5294		No	UL122, UL123	HHV5wtgp107, HHV5wtgp108	interacts with basal transcriptional machinery and cellular transcription factors; specific DNA-binding protein; involved in gene regulation, enhances activation by IE2; interacts with basal transcriptional machinery and cellular transcription factor; disrupts ND10; involved in gene regulation	regulatory protein IE2, regulatory protein IE1	AAR31665.1, AAR31666.1	GI:39842121, GI:39842122	MESSAKRKMDPDNPDEGPSSKVPRPETPVTKATTFLQTMLRKEV NSQLSLGDPLFPELAEESLKTFEQVTEDCNENPEKDVLTELGDILAQAVNHAGIDSSS TGPTLTTHSCSVSSAPLNKPTPTSVAVTNTPLPGASATPELSPRKKPRKTTRPFKVII KPPVPPAPIMLPLIKQEDIKPEPDFTIQYRNKIIDTAGCIVISDSEEEQGEEVETRGA TASSPSTGSGTPRVTSPTHPLSQMNHPPLPDPLGRPDEDSSSSSSSSCSSASDSESES EEMKCSSGGGASVTSSHHGRGGFGGAASSSLLSCGHQSSGGASTGPRKKKSKRISELD NEKVRNIMKDKNTPFCTPNVQTRRGRVKIDEVSRMFRHTNRSLEYKNLPFMIPSMHQV …
173986..173987	Replacement	TT	A	0.0450775	6	13	46.1538	2	17	11.7647		-
174233	SNV	A	G	0.0434227	13	13	100	12	17	70.5882		No	UL124	HHV5wtgp109	type 1 membrane protein	membrane protein UL124	AAR31667.1	GI:39842123	MERNSLLVCQLLCLVARAAATSTAQTTLPSTVNSTATGVTSDSQ QNTTQLPASSAAALSLPSASAVQAHSPSSFSDTYPTATALCGTLVVVGIVLCLSLAST VRSKELPSDHEPLEAWEQGSDVEAPPLPEKSPCPEHVPEIRVEIPRYV
174252	SNV	C	T	0.0473497	12	13	92.3077	10	17	58.8235	AAR31667.1:p.Gln44*	Yes	UL124	HHV5wtgp109	type 1 membrane protein	membrane protein UL124	AAR31667.1	GI:39842123	MERNSLLVCQLLCLVARAAATSTAQTTLPSTVNSTATGVTSDSQ QNTTQLPASSAAALSLPSASAVQAHSPSSFSDTYPTATALCGTLVVVGIVLCLSLAST VRSKELPSDHEPLEAWEQGSDVEAPPLPEKSPCPEHVPEIRVEIPRYV
174254	SNV	A	T	0.0473497	12	13	92.3077	10	17	58.8235	AAR31667.1:p.Gln44His	Yes	UL124	HHV5wtgp109	type 1 membrane protein	membrane protein UL124	AAR31667.1	GI:39842123	MERNSLLVCQLLCLVARAAATSTAQTTLPSTVNSTATGVTSDSQ QNTTQLPASSAAALSLPSASAVQAHSPSSFSDTYPTATALCGTLVVVGIVLCLSLAST VRSKELPSDHEPLEAWEQGSDVEAPPLPEKSPCPEHVPEIRVEIPRYV
174258^174259	Insertion	-	AT	0.0415003	8	13	61.5385	4	17	23.5294	AAR31667.1:p.Thr48fs	Yes	UL124	HHV5wtgp109	type 1 membrane protein	membrane protein UL124	AAR31667.1	GI:39842123	MERNSLLVCQLLCLVARAAATSTAQTTLPSTVNSTATGVTSDSQ QNTTQLPASSAAALSLPSASAVQAHSPSSFSDTYPTATALCGTLVVVGIVLCLSLAST VRSKELPSDHEPLEAWEQGSDVEAPPLPEKSPCPEHVPEIRVEIPRYV
174260^174261	Insertion	-	A	0.0415003	8	13	61.5385	4	17	23.5294	AAR31667.1:p.Thr47fs	Yes	UL124	HHV5wtgp109	type 1 membrane protein	membrane protein UL124	AAR31667.1	GI:39842123	MERNSLLVCQLLCLVARAAATSTAQTTLPSTVNSTATGVTSDSQ QNTTQLPASSAAALSLPSASAVQAHSPSSFSDTYPTATALCGTLVVVGIVLCLSLAST VRSKELPSDHEPLEAWEQGSDVEAPPLPEKSPCPEHVPEIRVEIPRYV
174276	Deletion	G	-	0.0450775	7	13	53.8462	3	17	17.6471	AAR31667.1:p.Ala52fs	Yes	UL124	HHV5wtgp109	type 1 membrane protein	membrane protein UL124	AAR31667.1	GI:39842123	MERNSLLVCQLLCLVARAAATSTAQTTLPSTVNSTATGVTSDSQ QNTTQLPASSAAALSLPSASAVQAHSPSSFSDTYPTATALCGTLVVVGIVLCLSLAST VRSKELPSDHEPLEAWEQGSDVEAPPLPEKSPCPEHVPEIRVEIPRYV
174276^174277	Insertion	-	CAT	0.0237881	12	13	92.3077	9	17	52.9412	AAR31667.1:p.Ser54_Ala55insSer	Yes	UL124	HHV5wtgp109	type 1 membrane protein	membrane protein UL124	AAR31667.1	GI:39842123	MERNSLLVCQLLCLVARAAATSTAQTTLPSTVNSTATGVTSDSQ QNTTQLPASSAAALSLPSASAVQAHSPSSFSDTYPTATALCGTLVVVGIVLCLSLAST VRSKELPSDHEPLEAWEQGSDVEAPPLPEKSPCPEHVPEIRVEIPRYV
174278	SNV	T	A	0.0415003	8	13	61.5385	4	17	23.5294		No	UL124	HHV5wtgp109	type 1 membrane protein	membrane protein UL124	AAR31667.1	GI:39842123	MERNSLLVCQLLCLVARAAATSTAQTTLPSTVNSTATGVTSDSQ QNTTQLPASSAAALSLPSASAVQAHSPSSFSDTYPTATALCGTLVVVGIVLCLSLAST VRSKELPSDHEPLEAWEQGSDVEAPPLPEKSPCPEHVPEIRVEIPRYV
174285	SNV	G	T	0.0415003	8	13	61.5385	4	17	23.5294	AAR31667.1:p.Ala55Ser	Yes	UL124	HHV5wtgp109	type 1 membrane protein	membrane protein UL124	AAR31667.1	GI:39842123	MERNSLLVCQLLCLVARAAATSTAQTTLPSTVNSTATGVTSDSQ QNTTQLPASSAAALSLPSASAVQAHSPSSFSDTYPTATALCGTLVVVGIVLCLSLAST VRSKELPSDHEPLEAWEQGSDVEAPPLPEKSPCPEHVPEIRVEIPRYV
174290	SNV	T	C	0.00505771	10	13	76.9231	4	17	23.5294		No	UL124	HHV5wtgp109	type 1 membrane protein	membrane protein UL124	AAR31667.1	GI:39842123	MERNSLLVCQLLCLVARAAATSTAQTTLPSTVNSTATGVTSDSQ QNTTQLPASSAAALSLPSASAVQAHSPSSFSDTYPTATALCGTLVVVGIVLCLSLAST VRSKELPSDHEPLEAWEQGSDVEAPPLPEKSPCPEHVPEIRVEIPRYV
174401	SNV	C	T	0.00623974	8	13	61.5385	2	17	11.7647		No	UL124	HHV5wtgp109	type 1 membrane protein	membrane protein UL124	AAR31667.1	GI:39842123	MERNSLLVCQLLCLVARAAATSTAQTTLPSTVNSTATGVTSDSQ QNTTQLPASSAAALSLPSASAVQAHSPSSFSDTYPTATALCGTLVVVGIVLCLSLAST VRSKELPSDHEPLEAWEQGSDVEAPPLPEKSPCPEHVPEIRVEIPRYV
174479	SNV	G	C	0.0178911	8	13	61.5385	3	17	17.6471	AAR31667.1:p.Glu119Asp	Yes	UL124	HHV5wtgp109	type 1 membrane protein	membrane protein UL124	AAR31667.1	GI:39842123	MERNSLLVCQLLCLVARAAATSTAQTTLPSTVNSTATGVTSDSQ QNTTQLPASSAAALSLPSASAVQAHSPSSFSDTYPTATALCGTLVVVGIVLCLSLAST VRSKELPSDHEPLEAWEQGSDVEAPPLPEKSPCPEHVPEIRVEIPRYV
174592	SNV	T	G	0.0178911	8	13	61.5385	3	17	17.6471		-
174601	SNV	T	C	0.0178911	8	13	61.5385	3	17	17.6471		-
174946	SNV	G	A	0.0397373	5	13	38.4615	1	17	5.88235		-
175118	SNV	T	C	0.0450775	6	13	46.1538	2	17	11.7647		-
175493..175494	MNV	AT	GC	0.0397373	5	13	38.4615	1	17	5.88235		-
175623	SNV	T	A	0.0151724	6	13	46.1538	1	17	5.88235		-
175701	SNV	A	G	0.0354823	9	13	69.2308	5	17	29.4118		-
175835	SNV	C	A	0.0397373	5	13	38.4615	1	17	5.88235		-
175848	SNV	T	C	0.0397373	5	13	38.4615	1	17	5.88235		-
179891	SNV	C	T	0.0415003	8	13	61.5385	4	17	23.5294		No	UL148	HHV5wtgp114	type 1 membrane protein	membrane protein UL148	AAR31672.1	GI:39842128	MLRLLFTLVLLALYGPSVDASRDYVHVRLLSYRGDPLVFKHTFS GVRRPFTELGWAACRDWDSMHCTPFWSTDLEQMTDSVRRYSTVSPGKEVTLQLHGNQT VQPSFLSFTCRLQLEPVVENVGLYVAYVVNDGERPQQFFTPQVDVVRFALYLETLSRI VEPLESGRLTVEFDTPDLALAPDLVSSLFVAGHGETDFYMNWTLRRSQTHYLEEMALQ VEILKPRGVRHRAIIHHPKLQPGVGLWIDFCVYRYNARLTRGYVRYTLSPKARLPAKA EGWLVSLDRFIVQYLNTLLITMMAAIWARVLITYLVSRRR
181804	SNV	A	G	0.0450775	6	13	46.1538	2	17	11.7647		No	UL145	HHV5wtgp118	RL1 family	protein UL145	AAR31676.1	GI:39842132	MYGVLAHYYSFISSPSVMVNFKHHNAVQLLCARTRDGTAGWERL THHASYHANYGAYAVLMATSQRKSLVLHRYSAVTAVALQLMPVEMLRRLDQSDWVRGA WIVSETFPTSDPKGFWSDDDSPMGGSED
182416	SNV	G	A	0.0354823	9	13	69.2308	5	17	29.4118		No	UL144	HHV5wtgp119	type 1 membrane protein; similar to TNFR; interacts with BTLA and inhibits T cell proliferation; does not bind TNF superfamily ligands; activates NFkappaB via TRAF6-dependent mechanism to upregulate CCL22; involved in immune regulation	membrane glycoprotein UL144	AAR31677.1	GI:39842133	MKPLVMLICFGVILLQLGVTKVCQHNEVQLGNECCPPCGLGQRV TKVCTERTSVTCTPCPNGTYVSGLYNCTDCTQCNVTQVMIRNCTSTNNTVCAPKNHTY FSTPGVQHHKQRQQNHTAHITVKQGKSGRHTLAWLSLFIFLVGIILLILYLIAAYRSE RCQQCCSIGKIFYRTL
183323	SNV	T	C	0.0450775	7	13	53.8462	3	17	17.6471		-
183669	SNV	A	G	0.0354823	9	13	69.2308	5	17	29.4118	AAR31678.1:p.Tyr219His	Yes	UL142	HHV5wtgp120	type 1 membrane protein; similar to MHC-I; inhibits NK cell cytotoxicity; downregulates MICA; acts on activating receptor NKG2D; involved in immune regulation; MHC family	membrane glycoprotein UL142	AAR31678.1	GI:39842134	MRIEWACWLFGYFVSSVGSERSLSYRYHLESNSSANVVCNGNIS VFVNGTLGVRYNITVGISSSLLIGHLTIQTLESWFTPWVQNKSYSKQPLSTTETLYNI DSENIHRVSQYFHTRWIKSLQENHTCDLTNSTPTYTYQANVNNTNYLTLTSSGWQDRL NYTAINSTHFNLTESNITSIHKYLNTTCIERLRNYTLEPVYTTAVPQNVTPEHAITTL YTTPPNAITIKDTTQSHTVQTPSFNDTHNVTEHTLNISYVLSQKTNNTTSPWVYAIPM GATATIGAGLYIGKHFTPVKFVYEVWRGQ
183693	SNV	G	A	0.0415003	8	13	61.5385	4	17	23.5294	AAR31678.1:p.Pro211Ser	Yes	UL142	HHV5wtgp120	type 1 membrane protein; similar to MHC-I; inhibits NK cell cytotoxicity; downregulates MICA; acts on activating receptor NKG2D; involved in immune regulation; MHC family	membrane glycoprotein UL142	AAR31678.1	GI:39842134	MRIEWACWLFGYFVSSVGSERSLSYRYHLESNSSANVVCNGNIS VFVNGTLGVRYNITVGISSSLLIGHLTIQTLESWFTPWVQNKSYSKQPLSTTETLYNI DSENIHRVSQYFHTRWIKSLQENHTCDLTNSTPTYTYQANVNNTNYLTLTSSGWQDRL NYTAINSTHFNLTESNITSIHKYLNTTCIERLRNYTLEPVYTTAVPQNVTPEHAITTL YTTPPNAITIKDTTQSHTVQTPSFNDTHNVTEHTLNISYVLSQKTNNTTSPWVYAIPM GATATIGAGLYIGKHFTPVKFVYEVWRGQ
183693^183694	Insertion	-	T	0.0354823	9	13	69.2308	5	17	29.4118	AAR31678.1:p.Pro211fs	Yes	UL142	HHV5wtgp120	type 1 membrane protein; similar to MHC-I; inhibits NK cell cytotoxicity; downregulates MICA; acts on activating receptor NKG2D; involved in immune regulation; MHC family	membrane glycoprotein UL142	AAR31678.1	GI:39842134	MRIEWACWLFGYFVSSVGSERSLSYRYHLESNSSANVVCNGNIS VFVNGTLGVRYNITVGISSSLLIGHLTIQTLESWFTPWVQNKSYSKQPLSTTETLYNI DSENIHRVSQYFHTRWIKSLQENHTCDLTNSTPTYTYQANVNNTNYLTLTSSGWQDRL NYTAINSTHFNLTESNITSIHKYLNTTCIERLRNYTLEPVYTTAVPQNVTPEHAITTL YTTPPNAITIKDTTQSHTVQTPSFNDTHNVTEHTLNISYVLSQKTNNTTSPWVYAIPM GATATIGAGLYIGKHFTPVKFVYEVWRGQ
185798	SNV	A	G	0.009553	13	13	100	10	17	58.8235		No	UL140	HHV5wtgp122	contains potential transmembrane domain	protein UL140	AAR31680.1	GI:39842136	MTPAQTNGTTTVHPHGAKNGSGGSALPTLVVFGFIVTLLFFLFM LYFWNNDVFRKLLRCAWIQRCCDRFDAWQDEVIYRRPSRRSQSDDESRTNSVSSYVLL SPASDGGFDNPALTEAVDSVDDWATTSVFYATSDETADTERRDSQQLLIELPPEPLPP DVVAAMQKAVKRAVQNALRHSHDSWQLHQTL
185846	SNV	A	G	0.009553	13	13	100	10	17	58.8235		No	UL140	HHV5wtgp122	contains potential transmembrane domain	protein UL140	AAR31680.1	GI:39842136	MTPAQTNGTTTVHPHGAKNGSGGSALPTLVVFGFIVTLLFFLFM LYFWNNDVFRKLLRCAWIQRCCDRFDAWQDEVIYRRPSRRSQSDDESRTNSVSSYVLL SPASDGGFDNPALTEAVDSVDDWATTSVFYATSDETADTERRDSQQLLIELPPEPLPP DVVAAMQKAVKRAVQNALRHSHDSWQLHQTL
185860	SNV	T	C	0.0208429	13	13	100	11	17	64.7059	AAR31680.1:p.Thr141Ala	Yes	UL140	HHV5wtgp122	contains potential transmembrane domain	protein UL140	AAR31680.1	GI:39842136	MTPAQTNGTTTVHPHGAKNGSGGSALPTLVVFGFIVTLLFFLFM LYFWNNDVFRKLLRCAWIQRCCDRFDAWQDEVIYRRPSRRSQSDDESRTNSVSSYVLL SPASDGGFDNPALTEAVDSVDDWATTSVFYATSDETADTERRDSQQLLIELPPEPLPP DVVAAMQKAVKRAVQNALRHSHDSWQLHQTL
185888	SNV	A	G	0.0473497	12	13	92.3077	10	17	58.8235		No	UL140	HHV5wtgp122	contains potential transmembrane domain	protein UL140	AAR31680.1	GI:39842136	MTPAQTNGTTTVHPHGAKNGSGGSALPTLVVFGFIVTLLFFLFM LYFWNNDVFRKLLRCAWIQRCCDRFDAWQDEVIYRRPSRRSQSDDESRTNSVSSYVLL SPASDGGFDNPALTEAVDSVDDWATTSVFYATSDETADTERRDSQQLLIELPPEPLPP DVVAAMQKAVKRAVQNALRHSHDSWQLHQTL
185930	SNV	T	C	0.0473497	12	13	92.3077	10	17	58.8235		No	UL140	HHV5wtgp122	contains potential transmembrane domain	protein UL140	AAR31680.1	GI:39842136	MTPAQTNGTTTVHPHGAKNGSGGSALPTLVVFGFIVTLLFFLFM LYFWNNDVFRKLLRCAWIQRCCDRFDAWQDEVIYRRPSRRSQSDDESRTNSVSSYVLL SPASDGGFDNPALTEAVDSVDDWATTSVFYATSDETADTERRDSQQLLIELPPEPLPP DVVAAMQKAVKRAVQNALRHSHDSWQLHQTL
186708	SNV	G	A	0.0354823	9	13	69.2308	5	17	29.4118		No	UL139	HHV5wtgp123	type 1 membrane protein	membrane glycoprotein UL139	AAR31681.1	GI:39842137	MLWILVLFALAASASETTTGTSSNSSQSTSAGTTNTTTPSTACI NASNGSDLGAPQLALLAASGWTLSGLLLIFTCCLCCFWLVRKVCSCCGNSSESESKAT HAYTNAAFTSSDATLPMGTTGSYTPPQDGSFPPPPR
186711	SNV	C	T	0.01947	11	13	84.6154	7	17	41.1765		No	UL139	HHV5wtgp123	type 1 membrane protein	membrane glycoprotein UL139	AAR31681.1	GI:39842137	MLWILVLFALAASASETTTGTSSNSSQSTSAGTTNTTTPSTACI NASNGSDLGAPQLALLAASGWTLSGLLLIFTCCLCCFWLVRKVCSCCGNSSESESKAT HAYTNAAFTSSDATLPMGTTGSYTPPQDGSFPPPPR
187420	SNV	C	T	0.0450775	7	13	53.8462	3	17	17.6471		-
190065	SNV	A	G	0.0473497	12	13	92.3077	10	17	58.8235	AAR31685.1:p.Ser220Pro	Yes	UL133	HHV5wtgp127	contains potential transmembrane domain	protein UL133	AAR31685.1	GI:39842141	MGCDVHDPSWQCQWGVPTIIVAWITCAALGIWCLAGSSADVSSG PGIAAVVGCSVFMIFLCAYLIRYREFFKDSVIDLLTCRWVRYCSCSCKCSCKCISGPC SRCCSACYKETMIYDMVQYGHRRRPGHGDDPDRVICEIVESPPVSAPTVFVPPPSEES HQPVIPPQPPTPTSEPKPKKGRAKDKPKGRPKNKPPCEPTVSSQPPSQPTAMPGGPPD ASPPAMPQMPPGVAEAVQAAVQAAMAAALQQQQQHQTGT
190609	SNV	C	T	0.0159236	9	13	69.2308	4	17	23.5294		No	UL133	HHV5wtgp127	contains potential transmembrane domain	protein UL133	AAR31685.1	GI:39842141	MGCDVHDPSWQCQWGVPTIIVAWITCAALGIWCLAGSSADVSSG PGIAAVVGCSVFMIFLCAYLIRYREFFKDSVIDLLTCRWVRYCSCSCKCSCKCISGPC SRCCSACYKETMIYDMVQYGHRRRPGHGDDPDRVICEIVESPPVSAPTVFVPPPSEES HQPVIPPQPPTPTSEPKPKKGRAKDKPKGRPKNKPPCEPTVSSQPPSQPTAMPGGPPD ASPPAMPQMPPGVAEAVQAAVQAAMAAALQQQQQHQTGT
191379	SNV	C	A	0.0208429	13	13	100	11	17	64.7059		No	UL148B	HHV5wtgp129	contains potential transmembrane domain	protein UL148B	AAR31687.1	GI:39842143	MALDTLAGLAICVGLVMGVTVIASCALLVFYYCDEREDGRPSKL LQRSIRRWRHGLSTESLTAILPDGSSTEQEIYHTRL
191710	SNV	T	C	0.0450775	6	13	46.1538	2	17	11.7647		No	UL148C	HHV5wtgp130	contains potential transmembrane domain	protein UL148C	AAR31688.1	GI:39842144	MLTPAVFPAVLYLLALVVWVEMFCLVAVAVVEREIAWALLLRML VVGLMVEVGAAAAWTFVRCLAYQRSFPVLTAFP
192065	SNV	A	G	0.0415003	8	13	61.5385	4	17	23.5294		-
192627	SNV	C	T	0.0450775	7	13	53.8462	3	17	17.6471	AAR31690.1:p.Gly545Asp	Yes	UL150	HHV5wtgp132	contains signal peptide	protein UL150	AAR31690.1	GI:39842146	MLTLYLFTATCCFVCALPRQAQVDTAICHHTWPMCSDVPHPTSS AHNTALSSSHAISIEHRLLHSPSPPRENIRHSMRCRRRAIASSASTPVSHTQPLAANH RRSRITYATTDPTNSPTASPAKSDKLEADADPALHRRPDSLLRHLFQPCHAQRGTSNR ATSQRASLNAVHHKLCGAMISSSWSTTCTPAIMDLPSLSVELSAGHKKKETPTEGGWG GEEGEDDVLATIRNTLSAPTSPAAATTHRLSFPEGSSFCLTAVSEYSQRLTSTAALTP PPPAVAAPFSFSSTVSETGAFPQSTAGRTRVDDTAVVTAGDPRSPVTHVTLLQIFRLR SSLLTSRSGDTLRGGEHEAIPKVASLFWTLLKATQTVEITHKTPSADSHRNPQKYTDR …
192742	SNV	C	G	0.0450775	7	13	53.8462	3	17	17.6471	AAR31690.1:p.Val507Leu	Yes	UL150	HHV5wtgp132	contains signal peptide	protein UL150	AAR31690.1	GI:39842146	MLTLYLFTATCCFVCALPRQAQVDTAICHHTWPMCSDVPHPTSS AHNTALSSSHAISIEHRLLHSPSPPRENIRHSMRCRRRAIASSASTPVSHTQPLAANH RRSRITYATTDPTNSPTASPAKSDKLEADADPALHRRPDSLLRHLFQPCHAQRGTSNR ATSQRASLNAVHHKLCGAMISSSWSTTCTPAIMDLPSLSVELSAGHKKKETPTEGGWG GEEGEDDVLATIRNTLSAPTSPAAATTHRLSFPEGSSFCLTAVSEYSQRLTSTAALTP PPPAVAAPFSFSSTVSETGAFPQSTAGRTRVDDTAVVTAGDPRSPVTHVTLLQIFRLR SSLLTSRSGDTLRGGEHEAIPKVASLFWTLLKATQTVEITHKTPSADSHRNPQKYTDR …
193354	SNV	C	G	0.0450775	7	13	53.8462	3	17	17.6471	AAR31690.1:p.Gly303Arg; AEJ33669.1:p.Pro52Arg	Yes	UL150, UL150A	HHV5wtgp132, HHV5wtgr005	contains signal peptide	protein UL150, protein UL150A	AAR31690.1, AEJ33669.1	GI:39842146, GI:338970389	MLTLYLFTATCCFVCALPRQAQVDTAICHHTWPMCSDVPHPTSS AHNTALSSSHAISIEHRLLHSPSPPRENIRHSMRCRRRAIASSASTPVSHTQPLAANH RRSRITYATTDPTNSPTASPAKSDKLEADADPALHRRPDSLLRHLFQPCHAQRGTSNR ATSQRASLNAVHHKLCGAMISSSWSTTCTPAIMDLPSLSVELSAGHKKKETPTEGGWG GEEGEDDVLATIRNTLSAPTSPAAATTHRLSFPEGSSFCLTAVSEYSQRLTSTAALTP PPPAVAAPFSFSSTVSETGAFPQSTAGRTRVDDTAVVTAGDPRSPVTHVTLLQIFRLR SSLLTSRSGDTLRGGEHEAIPKVASLFWTLLKATQTVEITHKTPSADSHRNPQKYTDR …
193450	SNV	T	A	0.0450775	7	13	53.8462	3	17	17.6471	AAR31690.1:p.Thr271Ser; AEJ33669.1:p.Val84Asp	Yes	UL150, UL150A	HHV5wtgp132, HHV5wtgr005	contains signal peptide	protein UL150, protein UL150A	AAR31690.1, AEJ33669.1	GI:39842146, GI:338970389	MLTLYLFTATCCFVCALPRQAQVDTAICHHTWPMCSDVPHPTSS AHNTALSSSHAISIEHRLLHSPSPPRENIRHSMRCRRRAIASSASTPVSHTQPLAANH RRSRITYATTDPTNSPTASPAKSDKLEADADPALHRRPDSLLRHLFQPCHAQRGTSNR ATSQRASLNAVHHKLCGAMISSSWSTTCTPAIMDLPSLSVELSAGHKKKETPTEGGWG GEEGEDDVLATIRNTLSAPTSPAAATTHRLSFPEGSSFCLTAVSEYSQRLTSTAALTP PPPAVAAPFSFSSTVSETGAFPQSTAGRTRVDDTAVVTAGDPRSPVTHVTLLQIFRLR SSLLTSRSGDTLRGGEHEAIPKVASLFWTLLKATQTVEITHKTPSADSHRNPQKYTDR …
193490	SNV	G	C	0.0178911	8	13	61.5385	3	17	17.6471	AAR31690.1:p.Cys257Trp; AEJ33669.1:p.Arg97Ser	Yes	UL150, UL150A	HHV5wtgp132, HHV5wtgr005	contains signal peptide	protein UL150, protein UL150A	AAR31690.1, AEJ33669.1	GI:39842146, GI:338970389	MLTLYLFTATCCFVCALPRQAQVDTAICHHTWPMCSDVPHPTSS AHNTALSSSHAISIEHRLLHSPSPPRENIRHSMRCRRRAIASSASTPVSHTQPLAANH RRSRITYATTDPTNSPTASPAKSDKLEADADPALHRRPDSLLRHLFQPCHAQRGTSNR ATSQRASLNAVHHKLCGAMISSSWSTTCTPAIMDLPSLSVELSAGHKKKETPTEGGWG GEEGEDDVLATIRNTLSAPTSPAAATTHRLSFPEGSSFCLTAVSEYSQRLTSTAALTP PPPAVAAPFSFSSTVSETGAFPQSTAGRTRVDDTAVVTAGDPRSPVTHVTLLQIFRLR SSLLTSRSGDTLRGGEHEAIPKVASLFWTLLKATQTVEITHKTPSADSHRNPQKYTDR …
193521	SNV	C	G	0.0450775	7	13	53.8462	3	17	17.6471	AAR31690.1:p.Arg247Pro; AEJ33669.1:p.Arg108Gly	Yes	UL150, UL150A	HHV5wtgp132, HHV5wtgr005	contains signal peptide	protein UL150, protein UL150A	AAR31690.1, AEJ33669.1	GI:39842146, GI:338970389	MLTLYLFTATCCFVCALPRQAQVDTAICHHTWPMCSDVPHPTSS AHNTALSSSHAISIEHRLLHSPSPPRENIRHSMRCRRRAIASSASTPVSHTQPLAANH RRSRITYATTDPTNSPTASPAKSDKLEADADPALHRRPDSLLRHLFQPCHAQRGTSNR ATSQRASLNAVHHKLCGAMISSSWSTTCTPAIMDLPSLSVELSAGHKKKETPTEGGWG GEEGEDDVLATIRNTLSAPTSPAAATTHRLSFPEGSSFCLTAVSEYSQRLTSTAALTP PPPAVAAPFSFSSTVSETGAFPQSTAGRTRVDDTAVVTAGDPRSPVTHVTLLQIFRLR SSLLTSRSGDTLRGGEHEAIPKVASLFWTLLKATQTVEITHKTPSADSHRNPQKYTDR …
193529	SNV	G	T	0.0450775	7	13	53.8462	3	17	17.6471		No	UL150, UL150A	HHV5wtgp132, HHV5wtgr005	contains signal peptide	protein UL150, protein UL150A	AAR31690.1, AEJ33669.1	GI:39842146, GI:338970389	MLTLYLFTATCCFVCALPRQAQVDTAICHHTWPMCSDVPHPTSS AHNTALSSSHAISIEHRLLHSPSPPRENIRHSMRCRRRAIASSASTPVSHTQPLAANH RRSRITYATTDPTNSPTASPAKSDKLEADADPALHRRPDSLLRHLFQPCHAQRGTSNR ATSQRASLNAVHHKLCGAMISSSWSTTCTPAIMDLPSLSVELSAGHKKKETPTEGGWG GEEGEDDVLATIRNTLSAPTSPAAATTHRLSFPEGSSFCLTAVSEYSQRLTSTAALTP PPPAVAAPFSFSSTVSETGAFPQSTAGRTRVDDTAVVTAGDPRSPVTHVTLLQIFRLR SSLLTSRSGDTLRGGEHEAIPKVASLFWTLLKATQTVEITHKTPSADSHRNPQKYTDR …
193535	SNV	C	T	0.0450775	7	13	53.8462	3	17	17.6471		No	UL150, UL150A	HHV5wtgp132, HHV5wtgr005	contains signal peptide	protein UL150, protein UL150A	AAR31690.1, AEJ33669.1	GI:39842146, GI:338970389	MLTLYLFTATCCFVCALPRQAQVDTAICHHTWPMCSDVPHPTSS AHNTALSSSHAISIEHRLLHSPSPPRENIRHSMRCRRRAIASSASTPVSHTQPLAANH RRSRITYATTDPTNSPTASPAKSDKLEADADPALHRRPDSLLRHLFQPCHAQRGTSNR ATSQRASLNAVHHKLCGAMISSSWSTTCTPAIMDLPSLSVELSAGHKKKETPTEGGWG GEEGEDDVLATIRNTLSAPTSPAAATTHRLSFPEGSSFCLTAVSEYSQRLTSTAALTP PPPAVAAPFSFSSTVSETGAFPQSTAGRTRVDDTAVVTAGDPRSPVTHVTLLQIFRLR SSLLTSRSGDTLRGGEHEAIPKVASLFWTLLKATQTVEITHKTPSADSHRNPQKYTDR …
193561	SNV	A	G	0.00608643	9	13	69.2308	3	17	17.6471		No	UL150	HHV5wtgp132	contains signal peptide	protein UL150	AAR31690.1	GI:39842146	MLTLYLFTATCCFVCALPRQAQVDTAICHHTWPMCSDVPHPTSS AHNTALSSSHAISIEHRLLHSPSPPRENIRHSMRCRRRAIASSASTPVSHTQPLAANH RRSRITYATTDPTNSPTASPAKSDKLEADADPALHRRPDSLLRHLFQPCHAQRGTSNR ATSQRASLNAVHHKLCGAMISSSWSTTCTPAIMDLPSLSVELSAGHKKKETPTEGGWG GEEGEDDVLATIRNTLSAPTSPAAATTHRLSFPEGSSFCLTAVSEYSQRLTSTAALTP PPPAVAAPFSFSSTVSETGAFPQSTAGRTRVDDTAVVTAGDPRSPVTHVTLLQIFRLR SSLLTSRSGDTLRGGEHEAIPKVASLFWTLLKATQTVEITHKTPSADSHRNPQKYTDR …
193647	SNV	C	T	0.0159236	9	13	69.2308	4	17	23.5294	AAR31690.1:p.Gly205Glu	Yes	UL150	HHV5wtgp132	contains signal peptide	protein UL150	AAR31690.1	GI:39842146	MLTLYLFTATCCFVCALPRQAQVDTAICHHTWPMCSDVPHPTSS AHNTALSSSHAISIEHRLLHSPSPPRENIRHSMRCRRRAIASSASTPVSHTQPLAANH RRSRITYATTDPTNSPTASPAKSDKLEADADPALHRRPDSLLRHLFQPCHAQRGTSNR ATSQRASLNAVHHKLCGAMISSSWSTTCTPAIMDLPSLSVELSAGHKKKETPTEGGWG GEEGEDDVLATIRNTLSAPTSPAAATTHRLSFPEGSSFCLTAVSEYSQRLTSTAALTP PPPAVAAPFSFSSTVSETGAFPQSTAGRTRVDDTAVVTAGDPRSPVTHVTLLQIFRLR SSLLTSRSGDTLRGGEHEAIPKVASLFWTLLKATQTVEITHKTPSADSHRNPQKYTDR …
193649	SNV	T	C	0.0159236	9	13	69.2308	4	17	23.5294		No	UL150	HHV5wtgp132	contains signal peptide	protein UL150	AAR31690.1	GI:39842146	MLTLYLFTATCCFVCALPRQAQVDTAICHHTWPMCSDVPHPTSS AHNTALSSSHAISIEHRLLHSPSPPRENIRHSMRCRRRAIASSASTPVSHTQPLAANH RRSRITYATTDPTNSPTASPAKSDKLEADADPALHRRPDSLLRHLFQPCHAQRGTSNR ATSQRASLNAVHHKLCGAMISSSWSTTCTPAIMDLPSLSVELSAGHKKKETPTEGGWG GEEGEDDVLATIRNTLSAPTSPAAATTHRLSFPEGSSFCLTAVSEYSQRLTSTAALTP PPPAVAAPFSFSSTVSETGAFPQSTAGRTRVDDTAVVTAGDPRSPVTHVTLLQIFRLR SSLLTSRSGDTLRGGEHEAIPKVASLFWTLLKATQTVEITHKTPSADSHRNPQKYTDR …
193651	SNV	C	T	0.0159236	9	13	69.2308	4	17	23.5294	AAR31690.1:p.Ala204Thr	Yes	UL150	HHV5wtgp132	contains signal peptide	protein UL150	AAR31690.1	GI:39842146	MLTLYLFTATCCFVCALPRQAQVDTAICHHTWPMCSDVPHPTSS AHNTALSSSHAISIEHRLLHSPSPPRENIRHSMRCRRRAIASSASTPVSHTQPLAANH RRSRITYATTDPTNSPTASPAKSDKLEADADPALHRRPDSLLRHLFQPCHAQRGTSNR ATSQRASLNAVHHKLCGAMISSSWSTTCTPAIMDLPSLSVELSAGHKKKETPTEGGWG GEEGEDDVLATIRNTLSAPTSPAAATTHRLSFPEGSSFCLTAVSEYSQRLTSTAALTP PPPAVAAPFSFSSTVSETGAFPQSTAGRTRVDDTAVVTAGDPRSPVTHVTLLQIFRLR SSLLTSRSGDTLRGGEHEAIPKVASLFWTLLKATQTVEITHKTPSADSHRNPQKYTDR …
193767	SNV	C	T	0.0159236	9	13	69.2308	4	17	23.5294	AAR31690.1:p.Arg165Lys; AEJ33669.1:p.Leu153Phe	Yes	UL150, UL150A	HHV5wtgp132, HHV5wtgr005	contains signal peptide	protein UL150, protein UL150A	AAR31690.1, AEJ33669.1	GI:39842146, GI:338970389	MLTLYLFTATCCFVCALPRQAQVDTAICHHTWPMCSDVPHPTSS AHNTALSSSHAISIEHRLLHSPSPPRENIRHSMRCRRRAIASSASTPVSHTQPLAANH RRSRITYATTDPTNSPTASPAKSDKLEADADPALHRRPDSLLRHLFQPCHAQRGTSNR ATSQRASLNAVHHKLCGAMISSSWSTTCTPAIMDLPSLSVELSAGHKKKETPTEGGWG GEEGEDDVLATIRNTLSAPTSPAAATTHRLSFPEGSSFCLTAVSEYSQRLTSTAALTP PPPAVAAPFSFSSTVSETGAFPQSTAGRTRVDDTAVVTAGDPRSPVTHVTLLQIFRLR SSLLTSRSGDTLRGGEHEAIPKVASLFWTLLKATQTVEITHKTPSADSHRNPQKYTDR …
193781	SNV	T	C	0.00608643	9	13	69.2308	3	17	17.6471		No	UL150, UL150A	HHV5wtgp132, HHV5wtgr005	contains signal peptide	protein UL150, protein UL150A	AAR31690.1, AEJ33669.1	GI:39842146, GI:338970389	MLTLYLFTATCCFVCALPRQAQVDTAICHHTWPMCSDVPHPTSS AHNTALSSSHAISIEHRLLHSPSPPRENIRHSMRCRRRAIASSASTPVSHTQPLAANH RRSRITYATTDPTNSPTASPAKSDKLEADADPALHRRPDSLLRHLFQPCHAQRGTSNR ATSQRASLNAVHHKLCGAMISSSWSTTCTPAIMDLPSLSVELSAGHKKKETPTEGGWG GEEGEDDVLATIRNTLSAPTSPAAATTHRLSFPEGSSFCLTAVSEYSQRLTSTAALTP PPPAVAAPFSFSSTVSETGAFPQSTAGRTRVDDTAVVTAGDPRSPVTHVTLLQIFRLR SSLLTSRSGDTLRGGEHEAIPKVASLFWTLLKATQTVEITHKTPSADSHRNPQKYTDR …
193785	SNV	T	C	0.0354823	9	13	69.2308	5	17	29.4118	AAR31690.1:p.Asn159Ser	Yes	UL150, UL150A	HHV5wtgp132, HHV5wtgr005	contains signal peptide	protein UL150, protein UL150A	AAR31690.1, AEJ33669.1	GI:39842146, GI:338970389	MLTLYLFTATCCFVCALPRQAQVDTAICHHTWPMCSDVPHPTSS AHNTALSSSHAISIEHRLLHSPSPPRENIRHSMRCRRRAIASSASTPVSHTQPLAANH RRSRITYATTDPTNSPTASPAKSDKLEADADPALHRRPDSLLRHLFQPCHAQRGTSNR ATSQRASLNAVHHKLCGAMISSSWSTTCTPAIMDLPSLSVELSAGHKKKETPTEGGWG GEEGEDDVLATIRNTLSAPTSPAAATTHRLSFPEGSSFCLTAVSEYSQRLTSTAALTP PPPAVAAPFSFSSTVSETGAFPQSTAGRTRVDDTAVVTAGDPRSPVTHVTLLQIFRLR SSLLTSRSGDTLRGGEHEAIPKVASLFWTLLKATQTVEITHKTPSADSHRNPQKYTDR …
193865	SNV	T	C	0.0354823	9	13	69.2308	5	17	29.4118		No	UL150, UL150A	HHV5wtgp132, HHV5wtgr005	contains signal peptide	protein UL150, protein UL150A	AAR31690.1, AEJ33669.1	GI:39842146, GI:338970389	MLTLYLFTATCCFVCALPRQAQVDTAICHHTWPMCSDVPHPTSS AHNTALSSSHAISIEHRLLHSPSPPRENIRHSMRCRRRAIASSASTPVSHTQPLAANH RRSRITYATTDPTNSPTASPAKSDKLEADADPALHRRPDSLLRHLFQPCHAQRGTSNR ATSQRASLNAVHHKLCGAMISSSWSTTCTPAIMDLPSLSVELSAGHKKKETPTEGGWG GEEGEDDVLATIRNTLSAPTSPAAATTHRLSFPEGSSFCLTAVSEYSQRLTSTAALTP PPPAVAAPFSFSSTVSETGAFPQSTAGRTRVDDTAVVTAGDPRSPVTHVTLLQIFRLR SSLLTSRSGDTLRGGEHEAIPKVASLFWTLLKATQTVEITHKTPSADSHRNPQKYTDR …
195157	Deletion	T	-	0.0450775	6	13	46.1538	2	17	11.7647		-
195190	SNV	C	G	0.0178911	8	13	61.5385	3	17	17.6471		-
195202	SNV	C	T	0.0450775	7	13	53.8462	3	17	17.6471		-
195209	SNV	T	G	0.0260901	4	13	30.7692	0	17	0		-
195257^195258	Insertion	-	G	0.0260901	4	13	30.7692	0	17	0		-
199275	SNV	T	C	0.0208429	13	13	100	11	17	64.7059		-
201097	SNV	C	A	0.0397373	5	13	38.4615	1	17	5.88235		-
202499	SNV	G	T	0.0397373	5	13	38.4615	1	17	5.88235		-
219116	SNV	A	G	0.0415003	8	13	61.5385	4	17	23.5294		No	US23	HHV5wtgp154	US22 family	protein US23	AAR31712.1	GI:39842168	MWRTRWEDGAPTFTRNDEFLYCHTRYETFLRVMGDFQGIFECQY SADVLRDWVRNHVDQVLSLGIPHNWFLQVRPGSTMPELRDQLLDDVICCPERLIVLGK CVIMVDDHYEETELVLCMGGGTRLYIYEPSQEILLLCARHLDELARYGMMYTEAVYRQ PQTPFATRVPHDVVAMLLRHGHDTDALAACVGEHHGRDVNFHTPGRHAKTLKLLTSFG CLTDCWPFEVAPAARLAECEMYVTLQLRCRWYLLGAVGSYRAGGFFDTSFLIIFDRFC RFYVVIVKSHLDRSPPLQRLAGEIYRLADSLEELFRAGLMKVYVRRRYEHGLRRAARL ERNGGCVHMGEAARLHFTMFDSGVDRDYARQFRWLCRGDRFRAEMLNNWDGWDAFTIW …
221391	SNV	G	A	0.0450775	7	13	53.8462	3	17	17.6471		-
221430	SNV	C	T	0.0450775	7	13	53.8462	3	17	17.6471		-
228102	SNV	C	T	0.0450775	7	13	53.8462	3	17	17.6471		No	US30	HHV5wtgp160	type 1 membrane protein	membrane protein US30	AAR31718.1	GI:39842174	MGNPRSPLDRRLRFRNVPFLPPRIAASSTTTARSLKAKTMEMRF TIAWMWFPSVLLILGLLTPPSNGCTVDVGRNVSIREQCRLRNGATFSKGDIEGNFSGP VVVELDYEDIDITGERQRLRFHLSGLGCPTKENIRKDNESDVNGGIRWALYIQTGDAK YGIRNQHLSIRLMYPGEKNTQQLLGSDFSCERHRRPSTPLGKNAEVPPATRTSSTYGV LSAFVVWIGSGLNIIWWTGIVLLAADALGLGERWLRLALSHRDKHHASRTAALQCQRD MLLRQRRRARRLHAVSEGKLQEEKKRQSALVWNVEARPFPSTHQLIVLPPPVASAPPA VPSQPPEYSSVFPPV
229998	SNV	G	A	0.0397373	5	13	38.4615	1	17	5.88235		No	US32	HHV5wtgp162	contains duplicated TT virus ORF2 motif; US1 family	protein US32	AAR31720.1	GI:39842176	MAMYTSESERDWRRVIHDSHGLWCDCGDWREHLYCVYDSHFQRR PTTRAERRAANWRRQMRRLHRLWCFCQDWKCHALYAEWDGKESDDESSASSSGEAPEQ QVPAWKTVRAFSRAYHHRINRGLRGTPPPRNLPGYEHASEGWRFCNRRERREDDLRTR AEPDRVVFQLGGVPPRRHRETYV
230191..230193	Deletion	AAC	-	0.0450775	6	13	46.1538	2	17	11.7647		-
231022	SNV	C	T	0.0159236	9	13	69.2308	4	17	23.5294	AAR31721.1:p.Pro103Ser	Yes	US34	HHV5wtgp163	contains signal peptide	protein US34	AAR31721.1	GI:39842177	MNLEQLINVLGLLVWIAARAVSRVGPHGSGLVYRELHDFYGYLQ LDLLGPVVAGNRSVRTWREQADRARGTFVRRSGLNTSHILPVGGLSGGSGTLPAGLYR PEEEVFLLLNRCHGPLSTPKSACLAEVGVANASFLSRFNVGDFHGASWENGTAPDGEP GVC
231110	SNV	C	T	0.0159236	9	13	69.2308	4	17	23.5294	AAR31721.1:p.Ala132Val	Yes	US34	HHV5wtgp163	contains signal peptide	protein US34	AAR31721.1	GI:39842177	MNLEQLINVLGLLVWIAARAVSRVGPHGSGLVYRELHDFYGYLQ LDLLGPVVAGNRSVRTWREQADRARGTFVRRSGLNTSHILPVGGLSGGSGTLPAGLYR PEEEVFLLLNRCHGPLSTPKSACLAEVGVANASFLSRFNVGDFHGASWENGTAPDGEP GVC
231367..231368	MNV	GT	AC	0.0159236	9	13	69.2308	4	17	23.5294	AAR31722.1:p.Arg56His	Yes	US34A	HHV5wtgp164	contains potential transmembrane domain	protein US34A	AAR31722.1	GI:39842178	MLKFFLKLRKRRRPVVVPRFVRFIVYVVLFTVAVQRVKQERDAH LRRYEERLQKNRARRRQSFP
232681	SNV	C	T	0.0397373	5	13	38.4615	1	17	5.88235		No	TRS1	HHV5wtgp165	transcriptional activator; blocks phosphorylation of eIF2alpha and host shutoff of protein synthesis; binds dsRNA; involved in gene regulation; involved in translational regulation; US22 family	tegument protein TRS1	AAR31723.1	GI:39842179	MAQRNGMSPRPPPLGRGRGAGGPSGVGSSPPSSCVPMGATSTAG TGASAAPTATPGHGVHRVEPRGPPGAPPSSGNNSNFWHGPERLLLSQIPVERQALTEL EYQAMGAVWRAAFLANSTGRAMRKWSQRDAGTLLPLGRPYGFYARVTPRSQMNGVGAT DLRQLSPRDAWIVLVATVVHEVDPAADPTVGDKAGHPEGLCAQDGLYLALGAGFRVFV YDLANNTLILAARDADEWFRHGAGEVVRLYRCNRLGVGTPRATLLPQPALRQTLLRAE EATALGRELRRRWAGTTVALQTPGRRLQPMVLLGAWQELAQYEPFASAPHPASLLTAV RRHLNQRLCCGWLALGAVLPARWLGCAAGPATGTTSPPAASGTETEAAGGDAPCAMAG …
232738	SNV	C	T	0.0450775	6	13	46.1538	2	17	11.7647		No	TRS1	HHV5wtgp165	transcriptional activator; blocks phosphorylation of eIF2alpha and host shutoff of protein synthesis; binds dsRNA; involved in gene regulation; involved in translational regulation; US22 family	tegument protein TRS1	AAR31723.1	GI:39842179	MAQRNGMSPRPPPLGRGRGAGGPSGVGSSPPSSCVPMGATSTAG TGASAAPTATPGHGVHRVEPRGPPGAPPSSGNNSNFWHGPERLLLSQIPVERQALTEL EYQAMGAVWRAAFLANSTGRAMRKWSQRDAGTLLPLGRPYGFYARVTPRSQMNGVGAT DLRQLSPRDAWIVLVATVVHEVDPAADPTVGDKAGHPEGLCAQDGLYLALGAGFRVFV YDLANNTLILAARDADEWFRHGAGEVVRLYRCNRLGVGTPRATLLPQPALRQTLLRAE EATALGRELRRRWAGTTVALQTPGRRLQPMVLLGAWQELAQYEPFASAPHPASLLTAV RRHLNQRLCCGWLALGAVLPARWLGCAAGPATGTTSPPAASGTETEAAGGDAPCAMAG …
