# Supplementary material for: Association of CMV genomic mutations with symptomatic infection and hearing loss in congenital CMV infection
Source: BMC Infect Dis. 2019 Dec 10;19:1046. doi: 10.1186/s12879-019-4681-0 (PMC6905059; doi:10.1186/s12879-019-4681-0)
Supplement: Supplementary file 5 — Additional file 5: Table S4. Non-parametric test comparing CMV nucleotide diversity by gene in samples between infants with normal hearing and those with SNHL. [file 12879_2019_4681_MOESM5_ESM.xlsx]

## Sheet: Sheet1
Supplemental Table 4. Non-parametric test comparing CMV nucleotide diversity by gene in samples between infants with normal hearing and those with SNHL.
gene	Z_WIL	P2_WIL
UL57	5.56525	2.61776e-08	DNA binding protein involoved in DNA replication
UL20	5.51269	3.53388e-08	membrane protein possible involved in immune evasion
UL104	-5.07562	3.86242e-07	capsid portal protein
US14	3.25411	0.00113749	7 transmembrane protein involved in viriom morphogenesis
UL115	2.96819	0.00299558	envelope glycoprotein involved in cell to cell spread
UL35	2.95261	0.00315099	tegument protein
