# Supplementary material for: Association of CMV genomic mutations with symptomatic infection and hearing loss in congenital CMV infection
Source: BMC Infect Dis. 2019 Dec 10;19:1046. doi: 10.1186/s12879-019-4681-0 (PMC6905059; doi:10.1186/s12879-019-4681-0)
Supplement: Supplementary file 6 — Additional file 6: Table S5. Table of CMV variants more common in children with SNHL. [file 12879_2019_4681_MOESM6_ESM.xlsx]

## Sheet: Fisher_17HL_13_NOHL_rm_bare...
Supplemental Table 5. Table of CMV variants more common in children with SNHL.
Region	Type	Reference	Allele	P-value	Sample count (case)	Total number of samples (case)	Sample frequency (case)	Sample count (control)	Total number of samples (control)	Sample frequency (control)	Amino acid change	Non-synonymous	gene (AY446894 (CDS))	locus_tag (AY446894 (CDS))	note (AY446894 (CDS))	product (AY446894 (CDS))	Protein id (AY446894 (CDS))	GI (AY446894 (CDS))	translation (AY446894 (CDS))
7836..7837	MNV	CA	TG	0.0354823	9	13	69.2308	5	17	29.4118		-
15153	SNV	T	C	0.0450775	6	13	46.1538	2	17	11.7647		No	UL6	HHV5wtgp012	type 1 membrane protein; RL11 family	membrane protein UL6	AAR31572.1	GI:39842028	MNGWAGVCLITHCLNTRSRTYVALNMLAFARTPRGVPSCLFNKV WVSRYALVLILMVCASESSTSWAVTSNGLPNCSTVTRTAGQDAELHGPAPLSCNVTQW GRYENGSTPVLWCTLRGSRMRVSLGHRVAFGCSWKTFFIYNVSESSGGTYYQKGYNCT DKHITLSCFNLTVVPRAVQSTTTVMTPTLVTNSTFSVSLVALRLTTNSSAFGHAIYQR QQRVENGTLSKNITNLAFTYGSWGVAMLLFAAVMVLVDLGLPQSAWRRWRSHVDDEER GLLM
15171	SNV	A	T	0.0395659	11	13	84.6154	8	17	47.0588		No	UL6	HHV5wtgp012	type 1 membrane protein; RL11 family	membrane protein UL6	AAR31572.1	GI:39842028	MNGWAGVCLITHCLNTRSRTYVALNMLAFARTPRGVPSCLFNKV WVSRYALVLILMVCASESSTSWAVTSNGLPNCSTVTRTAGQDAELHGPAPLSCNVTQW GRYENGSTPVLWCTLRGSRMRVSLGHRVAFGCSWKTFFIYNVSESSGGTYYQKGYNCT DKHITLSCFNLTVVPRAVQSTTTVMTPTLVTNSTFSVSLVALRLTTNSSAFGHAIYQR QQRVENGTLSKNITNLAFTYGSWGVAMLLFAAVMVLVDLGLPQSAWRRWRSHVDDEER GLLM
15248	SNV	T	C	0.0178911	8	13	61.5385	3	17	17.6471	AAR31572.1:p.Leu95Ser	Yes	UL6	HHV5wtgp012	type 1 membrane protein; RL11 family	membrane protein UL6	AAR31572.1	GI:39842028	MNGWAGVCLITHCLNTRSRTYVALNMLAFARTPRGVPSCLFNKV WVSRYALVLILMVCASESSTSWAVTSNGLPNCSTVTRTAGQDAELHGPAPLSCNVTQW GRYENGSTPVLWCTLRGSRMRVSLGHRVAFGCSWKTFFIYNVSESSGGTYYQKGYNCT DKHITLSCFNLTVVPRAVQSTTTVMTPTLVTNSTFSVSLVALRLTTNSSAFGHAIYQR QQRVENGTLSKNITNLAFTYGSWGVAMLLFAAVMVLVDLGLPQSAWRRWRSHVDDEER GLLM
15250	SNV	A	G	0.0278761	10	13	76.9231	6	17	35.2941	AAR31572.1:p.Ser96Gly	Yes	UL6	HHV5wtgp012	type 1 membrane protein; RL11 family	membrane protein UL6	AAR31572.1	GI:39842028	MNGWAGVCLITHCLNTRSRTYVALNMLAFARTPRGVPSCLFNKV WVSRYALVLILMVCASESSTSWAVTSNGLPNCSTVTRTAGQDAELHGPAPLSCNVTQW GRYENGSTPVLWCTLRGSRMRVSLGHRVAFGCSWKTFFIYNVSESSGGTYYQKGYNCT DKHITLSCFNLTVVPRAVQSTTTVMTPTLVTNSTFSVSLVALRLTTNSSAFGHAIYQR QQRVENGTLSKNITNLAFTYGSWGVAMLLFAAVMVLVDLGLPQSAWRRWRSHVDDEER GLLM
16476	SNV	G	A	0.0450775	6	13	46.1538	2	17	11.7647		No	UL7	HHV5wtgp013	type 1 membrane protein; modulates cytokine production; involved in immune regulation; RL11 family	membrane glycoprotein UL7	AAR31573.1	GI:39842029	MASDVGSHPLTVTRFRCRVHYVYNKLLILTLFAPVILESVIYVS GPQGGNVTLVSNFTSNISARWFRWDGNDSHLICFYKRGEGLSTPYVGLSLSCAANQIT IFNLTLNDSGRYGAEGFTRSGENETFLWYNLTVKPKPLETTPASNVTTIVTTTSTVTD AKSNVTGNVSLAPQLRAVAGFSHQTPLENNTHLALVGVVVFLVLIVVCIMGWWKLLCS KSEL
16540..16541	MNV	CC	GT	0.0151724	6	13	46.1538	1	17	5.88235		-
16588	SNV	C	T	0.0260901	4	13	30.7692	0	17	0		No	UL8	HHV5wtgp014	type 1 membrane protein; RL11 family	membrane glycoprotein UL8	AAR31574.2	GI:338970384	MASDVGSHPLTVTRFRCRVHYVYNKLLILTLFAPVILESVIYVS GPQGGNVTLVSNFTSNISARWFRWDGNDSHLICFYKRGEGLSTPYVGLSLSCAANQIT IFNLTLNDSGRYGAEGFTRSGENETFLWYNLTVKPKPLETTPASNVTTIVTTTSTVTD AKSNVTGNVSLAPQLRAVAGFSHQTPLENNTHLALGEGFVPTMTSSRLSASENYDGNY EFTETANTTRTNTSDWITLGSSASLLKSTETAVNLSNATTVIPQPVEYPAGGVQYQRA ATHYSWMLIIVIILIIFIIICLRAPRKIYHHWKDSKQYGQVFMTDTEL
16632..16633	MNV	AA	GG	0.0260901	4	13	30.7692	0	17	0	AAR31574.2:p.Thr223Ala	Yes	UL8	HHV5wtgp014	type 1 membrane protein; RL11 family	membrane glycoprotein UL8	AAR31574.2	GI:338970384	MASDVGSHPLTVTRFRCRVHYVYNKLLILTLFAPVILESVIYVS GPQGGNVTLVSNFTSNISARWFRWDGNDSHLICFYKRGEGLSTPYVGLSLSCAANQIT IFNLTLNDSGRYGAEGFTRSGENETFLWYNLTVKPKPLETTPASNVTTIVTTTSTVTD AKSNVTGNVSLAPQLRAVAGFSHQTPLENNTHLALGEGFVPTMTSSRLSASENYDGNY EFTETANTTRTNTSDWITLGSSASLLKSTETAVNLSNATTVIPQPVEYPAGGVQYQRA ATHYSWMLIIVIILIIFIIICLRAPRKIYHHWKDSKQYGQVFMTDTEL
16676	SNV	T	C	0.0260901	4	13	30.7692	0	17	0	AAR31574.2:p.Leu237Ser	Yes	UL8	HHV5wtgp014	type 1 membrane protein; RL11 family	membrane glycoprotein UL8	AAR31574.2	GI:338970384	MASDVGSHPLTVTRFRCRVHYVYNKLLILTLFAPVILESVIYVS GPQGGNVTLVSNFTSNISARWFRWDGNDSHLICFYKRGEGLSTPYVGLSLSCAANQIT IFNLTLNDSGRYGAEGFTRSGENETFLWYNLTVKPKPLETTPASNVTTIVTTTSTVTD AKSNVTGNVSLAPQLRAVAGFSHQTPLENNTHLALGEGFVPTMTSSRLSASENYDGNY EFTETANTTRTNTSDWITLGSSASLLKSTETAVNLSNATTVIPQPVEYPAGGVQYQRA ATHYSWMLIIVIILIIFIIICLRAPRKIYHHWKDSKQYGQVFMTDTEL
16698..16700	MNV	GAA	AGG	0.0260901	4	13	30.7692	0	17	0	AAR31574.2:p.Lys245Gly	Yes	UL8	HHV5wtgp014	type 1 membrane protein; RL11 family	membrane glycoprotein UL8	AAR31574.2	GI:338970384	MASDVGSHPLTVTRFRCRVHYVYNKLLILTLFAPVILESVIYVS GPQGGNVTLVSNFTSNISARWFRWDGNDSHLICFYKRGEGLSTPYVGLSLSCAANQIT IFNLTLNDSGRYGAEGFTRSGENETFLWYNLTVKPKPLETTPASNVTTIVTTTSTVTD AKSNVTGNVSLAPQLRAVAGFSHQTPLENNTHLALGEGFVPTMTSSRLSASENYDGNY EFTETANTTRTNTSDWITLGSSASLLKSTETAVNLSNATTVIPQPVEYPAGGVQYQRA ATHYSWMLIIVIILIIFIIICLRAPRKIYHHWKDSKQYGQVFMTDTEL
16699..16700	MNV	AA	GG	0.0237881	12	13	92.3077	9	17	52.9412	AAR31574.2:p.Lys245Gly	Yes	UL8	HHV5wtgp014	type 1 membrane protein; RL11 family	membrane glycoprotein UL8	AAR31574.2	GI:338970384	MASDVGSHPLTVTRFRCRVHYVYNKLLILTLFAPVILESVIYVS GPQGGNVTLVSNFTSNISARWFRWDGNDSHLICFYKRGEGLSTPYVGLSLSCAANQIT IFNLTLNDSGRYGAEGFTRSGENETFLWYNLTVKPKPLETTPASNVTTIVTTTSTVTD AKSNVTGNVSLAPQLRAVAGFSHQTPLENNTHLALGEGFVPTMTSSRLSASENYDGNY EFTETANTTRTNTSDWITLGSSASLLKSTETAVNLSNATTVIPQPVEYPAGGVQYQRA ATHYSWMLIIVIILIIFIIICLRAPRKIYHHWKDSKQYGQVFMTDTEL
16705	SNV	A	G	0.0260901	4	13	30.7692	0	17	0	AAR31574.2:p.Thr247Ala	Yes	UL8	HHV5wtgp014	type 1 membrane protein; RL11 family	membrane glycoprotein UL8	AAR31574.2	GI:338970384	MASDVGSHPLTVTRFRCRVHYVYNKLLILTLFAPVILESVIYVS GPQGGNVTLVSNFTSNISARWFRWDGNDSHLICFYKRGEGLSTPYVGLSLSCAANQIT IFNLTLNDSGRYGAEGFTRSGENETFLWYNLTVKPKPLETTPASNVTTIVTTTSTVTD AKSNVTGNVSLAPQLRAVAGFSHQTPLENNTHLALGEGFVPTMTSSRLSASENYDGNY EFTETANTTRTNTSDWITLGSSASLLKSTETAVNLSNATTVIPQPVEYPAGGVQYQRA ATHYSWMLIIVIILIIFIIICLRAPRKIYHHWKDSKQYGQVFMTDTEL
16716..16717	MNV	AG	GA	0.0151724	6	13	46.1538	1	17	5.88235	AAR31574.2:p.Val251Ile	Yes	UL8	HHV5wtgp014	type 1 membrane protein; RL11 family	membrane glycoprotein UL8	AAR31574.2	GI:338970384	MASDVGSHPLTVTRFRCRVHYVYNKLLILTLFAPVILESVIYVS GPQGGNVTLVSNFTSNISARWFRWDGNDSHLICFYKRGEGLSTPYVGLSLSCAANQIT IFNLTLNDSGRYGAEGFTRSGENETFLWYNLTVKPKPLETTPASNVTTIVTTTSTVTD AKSNVTGNVSLAPQLRAVAGFSHQTPLENNTHLALGEGFVPTMTSSRLSASENYDGNY EFTETANTTRTNTSDWITLGSSASLLKSTETAVNLSNATTVIPQPVEYPAGGVQYQRA ATHYSWMLIIVIILIIFIIICLRAPRKIYHHWKDSKQYGQVFMTDTEL
16724..16726	MNV	TCA	CTG	0.0260901	4	13	30.7692	0	17	0	AAR31574.2:p.Leu253_Ser254delinsProGly	Yes	UL8	HHV5wtgp014	type 1 membrane protein; RL11 family	membrane glycoprotein UL8	AAR31574.2	GI:338970384	MASDVGSHPLTVTRFRCRVHYVYNKLLILTLFAPVILESVIYVS GPQGGNVTLVSNFTSNISARWFRWDGNDSHLICFYKRGEGLSTPYVGLSLSCAANQIT IFNLTLNDSGRYGAEGFTRSGENETFLWYNLTVKPKPLETTPASNVTTIVTTTSTVTD AKSNVTGNVSLAPQLRAVAGFSHQTPLENNTHLALGEGFVPTMTSSRLSASENYDGNY EFTETANTTRTNTSDWITLGSSASLLKSTETAVNLSNATTVIPQPVEYPAGGVQYQRA ATHYSWMLIIVIILIIFIIICLRAPRKIYHHWKDSKQYGQVFMTDTEL
16726	SNV	A	G	0.0473497	12	13	92.3077	10	17	58.8235	AAR31574.2:p.Ser254Gly	Yes	UL8	HHV5wtgp014	type 1 membrane protein; RL11 family	membrane glycoprotein UL8	AAR31574.2	GI:338970384	MASDVGSHPLTVTRFRCRVHYVYNKLLILTLFAPVILESVIYVS GPQGGNVTLVSNFTSNISARWFRWDGNDSHLICFYKRGEGLSTPYVGLSLSCAANQIT IFNLTLNDSGRYGAEGFTRSGENETFLWYNLTVKPKPLETTPASNVTTIVTTTSTVTD AKSNVTGNVSLAPQLRAVAGFSHQTPLENNTHLALGEGFVPTMTSSRLSASENYDGNY EFTETANTTRTNTSDWITLGSSASLLKSTETAVNLSNATTVIPQPVEYPAGGVQYQRA ATHYSWMLIIVIILIIFIIICLRAPRKIYHHWKDSKQYGQVFMTDTEL
16762	SNV	T	C	0.0237881	12	13	92.3077	9	17	52.9412	AAR31574.2:p.Tyr266His	Yes	UL8	HHV5wtgp014	type 1 membrane protein; RL11 family	membrane glycoprotein UL8	AAR31574.2	GI:338970384	MASDVGSHPLTVTRFRCRVHYVYNKLLILTLFAPVILESVIYVS GPQGGNVTLVSNFTSNISARWFRWDGNDSHLICFYKRGEGLSTPYVGLSLSCAANQIT IFNLTLNDSGRYGAEGFTRSGENETFLWYNLTVKPKPLETTPASNVTTIVTTTSTVTD AKSNVTGNVSLAPQLRAVAGFSHQTPLENNTHLALGEGFVPTMTSSRLSASENYDGNY EFTETANTTRTNTSDWITLGSSASLLKSTETAVNLSNATTVIPQPVEYPAGGVQYQRA ATHYSWMLIIVIILIIFIIICLRAPRKIYHHWKDSKQYGQVFMTDTEL
16766	SNV	C	A	0.0260901	4	13	30.7692	0	17	0	AAR31574.2:p.Pro267Gln	Yes	UL8	HHV5wtgp014	type 1 membrane protein; RL11 family	membrane glycoprotein UL8	AAR31574.2	GI:338970384	MASDVGSHPLTVTRFRCRVHYVYNKLLILTLFAPVILESVIYVS GPQGGNVTLVSNFTSNISARWFRWDGNDSHLICFYKRGEGLSTPYVGLSLSCAANQIT IFNLTLNDSGRYGAEGFTRSGENETFLWYNLTVKPKPLETTPASNVTTIVTTTSTVTD AKSNVTGNVSLAPQLRAVAGFSHQTPLENNTHLALGEGFVPTMTSSRLSASENYDGNY EFTETANTTRTNTSDWITLGSSASLLKSTETAVNLSNATTVIPQPVEYPAGGVQYQRA ATHYSWMLIIVIILIIFIIICLRAPRKIYHHWKDSKQYGQVFMTDTEL
16818	SNV	A	G	0.0159236	9	13	69.2308	4	17	23.5294		No	UL8	HHV5wtgp014	type 1 membrane protein; RL11 family	membrane glycoprotein UL8	AAR31574.2	GI:338970384	MASDVGSHPLTVTRFRCRVHYVYNKLLILTLFAPVILESVIYVS GPQGGNVTLVSNFTSNISARWFRWDGNDSHLICFYKRGEGLSTPYVGLSLSCAANQIT IFNLTLNDSGRYGAEGFTRSGENETFLWYNLTVKPKPLETTPASNVTTIVTTTSTVTD AKSNVTGNVSLAPQLRAVAGFSHQTPLENNTHLALGEGFVPTMTSSRLSASENYDGNY EFTETANTTRTNTSDWITLGSSASLLKSTETAVNLSNATTVIPQPVEYPAGGVQYQRA ATHYSWMLIIVIILIIFIIICLRAPRKIYHHWKDSKQYGQVFMTDTEL
16870	SNV	C	A	0.0260901	4	13	30.7692	0	17	0		No	UL8	HHV5wtgp014	type 1 membrane protein; RL11 family	membrane glycoprotein UL8	AAR31574.2	GI:338970384	MASDVGSHPLTVTRFRCRVHYVYNKLLILTLFAPVILESVIYVS GPQGGNVTLVSNFTSNISARWFRWDGNDSHLICFYKRGEGLSTPYVGLSLSCAANQIT IFNLTLNDSGRYGAEGFTRSGENETFLWYNLTVKPKPLETTPASNVTTIVTTTSTVTD AKSNVTGNVSLAPQLRAVAGFSHQTPLENNTHLALGEGFVPTMTSSRLSASENYDGNY EFTETANTTRTNTSDWITLGSSASLLKSTETAVNLSNATTVIPQPVEYPAGGVQYQRA ATHYSWMLIIVIILIIFIIICLRAPRKIYHHWKDSKQYGQVFMTDTEL
16884	SNV	T	C	0.0260901	4	13	30.7692	0	17	0		No	UL8	HHV5wtgp014	type 1 membrane protein; RL11 family	membrane glycoprotein UL8	AAR31574.2	GI:338970384	MASDVGSHPLTVTRFRCRVHYVYNKLLILTLFAPVILESVIYVS GPQGGNVTLVSNFTSNISARWFRWDGNDSHLICFYKRGEGLSTPYVGLSLSCAANQIT IFNLTLNDSGRYGAEGFTRSGENETFLWYNLTVKPKPLETTPASNVTTIVTTTSTVTD AKSNVTGNVSLAPQLRAVAGFSHQTPLENNTHLALGEGFVPTMTSSRLSASENYDGNY EFTETANTTRTNTSDWITLGSSASLLKSTETAVNLSNATTVIPQPVEYPAGGVQYQRA ATHYSWMLIIVIILIIFIIICLRAPRKIYHHWKDSKQYGQVFMTDTEL
17505	SNV	G	A	0.0397373	5	13	38.4615	1	17	5.88235	AAR31575.1:p.Asp187Asn	Yes	UL9	HHV5wtgp015	type 1 membrane protein; RL11 family	membrane glycoprotein UL9	AAR31575.1	GI:39842031	MSKRLQVFPWITILFYTSKSQYWNYMTIPCTPTVGYGSHNISLH PLNNSLFQDDVFEWYIDKPMVTNKLCLYQSNERIKSNLDSPNIMWQCTDNRTLILMNL TTTYSRNYYFQSFKYLGQGVPKPNNLCYNVSVHFTHQTHCHTTTSSLYPPTSVHDSLE ISQSFTSTNFTHTAVHYAAGNVEAQHDTATSHTMWIIPLVIVITIIVLICFKFPQKAW NKFTQYRYSGMLAAA
17650	SNV	G	A	0.0260901	4	13	30.7692	0	17	0		-
17653	SNV	T	A	0.0260901	4	13	30.7692	0	17	0		-
17680	SNV	A	T	0.0260901	4	13	30.7692	0	17	0		-
17686..17687	MNV	AG	GA	0.0260901	4	13	30.7692	0	17	0		-
17744	SNV	A	C	0.0260901	4	13	30.7692	0	17	0		-
17785	SNV	C	G	0.0260901	4	13	30.7692	0	17	0	AAR31576.1:p.Leu4Val	Yes	UL10	HHV5wtgp016	type 1 membrane protein; RL11 family	membrane protein UL10	AAR31576.1	GI:39842032	MRQLINHIVNHDLFRWSVVTAMIFYRYSETCMEVTVRVGDPVTL GSGHGYHPGQKVHWYNQSCVGIGNGENTHPICTYDPPKPGRQKTMKTTPLPSPLLYEC HNSTLSILHVNVSDPRNYCRRKCPPKGNCEFPTCFTLSLISRTTTRKPEQKTTLLRLK TTPNKHTQHKRSTRRTSPKDYNVTGLPKGFADSFTGNVEAHRTKDAAHSAWILIIIII IIVVILFFFKIPQRLREKWDTKGYLYKGTDGLPTTD
17865	SNV	C	T	0.0397373	5	13	38.4615	1	17	5.88235		No	UL10	HHV5wtgp016	type 1 membrane protein; RL11 family	membrane protein UL10	AAR31576.1	GI:39842032	MRQLINHIVNHDLFRWSVVTAMIFYRYSETCMEVTVRVGDPVTL GSGHGYHPGQKVHWYNQSCVGIGNGENTHPICTYDPPKPGRQKTMKTTPLPSPLLYEC HNSTLSILHVNVSDPRNYCRRKCPPKGNCEFPTCFTLSLISRTTTRKPEQKTTLLRLK TTPNKHTQHKRSTRRTSPKDYNVTGLPKGFADSFTGNVEAHRTKDAAHSAWILIIIII IIVVILFFFKIPQRLREKWDTKGYLYKGTDGLPTTD
24470	SNV	A	G	0.0260901	4	13	30.7692	0	17	0	AAR31583.1:p.Lys165Arg	Yes	UL18	HHV5wtgp023	type 1 membrane protein; inhibits NK cell cytotoxicity; acts on inhibitory receptor LIR-1 (ILT2); involved in immune regulation; MHC family	membrane glycoprotein UL18	AAR31583.1	GI:39842039	MMTMWCLTLFVLWMLRVVGMHVLRYGYTGIFDDTSHMTLTVVGI FDGQHFFTYHVNSSDKASSRANGTISWMANVSAAYPTYLDGERAKGDLIFNQTEQNLL ELEIALGYRSQSVLTWTHECNTTENGSFVAGYEGFGWDGETLMELKDNLTLWTGPNYE ISWLKQNKTYIDGKIKNISEGDTTIQRNYLKGNCTQWSVIYSGFQTPVTHPVVKGGVR NQNDNRAEAFCTSYGFFPGEINITFIHYGNKAPDDSEPQCNPLLPTFDGTFHQGCYVA IFCNQNYTCRVTHGNWTVEIPISVTSPDDSSSGEVPDHPTANKRYNTMTISSVLLALL LCALLFAFLHYFTTLKQYLRNLAFAWRYRKVRSS
32515	SNV	C	T	0.0260901	4	13	30.7692	0	17	0		-
32872	SNV	C	T	0.0415003	8	13	61.5385	4	17	23.5294		No	UL26	HHV5wtgp031	transcriptional activator of major immediate early promoter; involved in gene regulation; US22 family	tegument protein UL26	AAR31591.1	GI:39842047	MTSRRAPDGGLNLDDFMRRQRGRHLDLPYPRGYTLFVCDVEETI LTPRDVEYWKLLVVTQGQLRVIGTIGLANLFSWDRSVAGVAADGSVLCYEISRENFVV RAADSLPQLLERGLLHSYFEDVERAAQGRLRHGNRSGLRRDADGQVIRESACYVSRAL LRHRVTPGKQEITDAMFEAGNVPSALLP
32905	SNV	A	G	0.0354823	9	13	69.2308	5	17	29.4118		No	UL26	HHV5wtgp031	transcriptional activator of major immediate early promoter; involved in gene regulation; US22 family	tegument protein UL26	AAR31591.1	GI:39842047	MTSRRAPDGGLNLDDFMRRQRGRHLDLPYPRGYTLFVCDVEETI LTPRDVEYWKLLVVTQGQLRVIGTIGLANLFSWDRSVAGVAADGSVLCYEISRENFVV RAADSLPQLLERGLLHSYFEDVERAAQGRLRHGNRSGLRRDADGQVIRESACYVSRAL LRHRVTPGKQEITDAMFEAGNVPSALLP
42511	SNV	G	A	0.0397373	5	13	38.4615	1	17	5.88235		No	UL32	HHV5wtgp037	major tegument protein; binds to capsids	tegument protein pp150	AAR31597.1	GI:39842053	MSLQFIGLQRRDVVALVNFLRHLTQKPDVDLEAHPKILKKCGEK RLHRRTVLFNELMLWLGYYRELRFHNPDLSSVLEEFEVRCAAVARRGYTYPFGDRGKA RDHLAVLDRTEFDTDVRHDAEIVERALVSAVILAKMSVRETLVTAIGQTEPIAFVHLK DTEVQRIEENLEGVRRNMFCAKPLDLNLDRHANTALVNAVNKLVYTGRLIMNVRRSWE ELERKCLARIQERCKLLVKELRMCLSFDSNYCRNILKHAVENGDSADTLLELLIEDFD IYVDSFPQSAHTFLGARSPSLEFDDDANLLSLGGGSAFSSVPKKHVPTQPLDGWSWIA SPWKGHKPFRFEAHGSLAPAAEAHAARSAAVGYYDEEEKRRERQKRVDDEVVQREKQQ …
42613	SNV	G	A	0.0397373	5	13	38.4615	1	17	5.88235		No	UL32	HHV5wtgp037	major tegument protein; binds to capsids	tegument protein pp150	AAR31597.1	GI:39842053	MSLQFIGLQRRDVVALVNFLRHLTQKPDVDLEAHPKILKKCGEK RLHRRTVLFNELMLWLGYYRELRFHNPDLSSVLEEFEVRCAAVARRGYTYPFGDRGKA RDHLAVLDRTEFDTDVRHDAEIVERALVSAVILAKMSVRETLVTAIGQTEPIAFVHLK DTEVQRIEENLEGVRRNMFCAKPLDLNLDRHANTALVNAVNKLVYTGRLIMNVRRSWE ELERKCLARIQERCKLLVKELRMCLSFDSNYCRNILKHAVENGDSADTLLELLIEDFD IYVDSFPQSAHTFLGARSPSLEFDDDANLLSLGGGSAFSSVPKKHVPTQPLDGWSWIA SPWKGHKPFRFEAHGSLAPAAEAHAARSAAVGYYDEEEKRRERQKRVDDEVVQREKQQ …
47945	SNV	T	A	0.0397373	5	13	38.4615	1	17	5.88235		No	UL35	HHV5wtgp040	UL25 family	tegument protein UL35	AAR31600.1	GI:39842056	MAQGSRAPSGPPLPVLPVDDWLNFRVDLFGDEHRRLLLEMLTQG CSNFVGLLNFGVPSPVYALEALVDFQVRNAFMKVKPVAQEIIRICILANHYRNSRDVL RDLRTQLDVLYSEPLKTRLLRGLIRLCRAAQTGVKPEDISVHLGADDVTFGVLKRALV RLHRVRDALGLRASPEAEARYPRLTTYNLLFHPPPFTTVEAVDLCAENLSDVTQRRNR PLRCLTSIKRPGSRTLEDALNDMYLLLTLRHLQLRHALELQMMQDWVVERCNRLCDAL YFCYTQAPETRQTFVTLVRGLELARQHSSPAFQPMLYNLLQLLTQLHEANVYLCPGYL HFSAYKLLKKIQSVSDARERGEFGDEDEEQENDGEPREAQLDLEADPTAREGELFFFS …
48176	SNV	G	A	0.0397373	5	13	38.4615	1	17	5.88235		No	UL35	HHV5wtgp040	UL25 family	tegument protein UL35	AAR31600.1	GI:39842056	MAQGSRAPSGPPLPVLPVDDWLNFRVDLFGDEHRRLLLEMLTQG CSNFVGLLNFGVPSPVYALEALVDFQVRNAFMKVKPVAQEIIRICILANHYRNSRDVL RDLRTQLDVLYSEPLKTRLLRGLIRLCRAAQTGVKPEDISVHLGADDVTFGVLKRALV RLHRVRDALGLRASPEAEARYPRLTTYNLLFHPPPFTTVEAVDLCAENLSDVTQRRNR PLRCLTSIKRPGSRTLEDALNDMYLLLTLRHLQLRHALELQMMQDWVVERCNRLCDAL YFCYTQAPETRQTFVTLVRGLELARQHSSPAFQPMLYNLLQLLTQLHEANVYLCPGYL HFSAYKLLKKIQSVSDARERGEFGDEDEEQENDGEPREAQLDLEADPTAREGELFFFS …
48230	SNV	G	A	0.0178911	8	13	61.5385	3	17	17.6471		No	UL35	HHV5wtgp040	UL25 family	tegument protein UL35	AAR31600.1	GI:39842056	MAQGSRAPSGPPLPVLPVDDWLNFRVDLFGDEHRRLLLEMLTQG CSNFVGLLNFGVPSPVYALEALVDFQVRNAFMKVKPVAQEIIRICILANHYRNSRDVL RDLRTQLDVLYSEPLKTRLLRGLIRLCRAAQTGVKPEDISVHLGADDVTFGVLKRALV RLHRVRDALGLRASPEAEARYPRLTTYNLLFHPPPFTTVEAVDLCAENLSDVTQRRNR PLRCLTSIKRPGSRTLEDALNDMYLLLTLRHLQLRHALELQMMQDWVVERCNRLCDAL YFCYTQAPETRQTFVTLVRGLELARQHSSPAFQPMLYNLLQLLTQLHEANVYLCPGYL HFSAYKLLKKIQSVSDARERGEFGDEDEEQENDGEPREAQLDLEADPTAREGELFFFS …
48242	SNV	G	C	0.0397373	5	13	38.4615	1	17	5.88235		No	UL35	HHV5wtgp040	UL25 family	tegument protein UL35	AAR31600.1	GI:39842056	MAQGSRAPSGPPLPVLPVDDWLNFRVDLFGDEHRRLLLEMLTQG CSNFVGLLNFGVPSPVYALEALVDFQVRNAFMKVKPVAQEIIRICILANHYRNSRDVL RDLRTQLDVLYSEPLKTRLLRGLIRLCRAAQTGVKPEDISVHLGADDVTFGVLKRALV RLHRVRDALGLRASPEAEARYPRLTTYNLLFHPPPFTTVEAVDLCAENLSDVTQRRNR PLRCLTSIKRPGSRTLEDALNDMYLLLTLRHLQLRHALELQMMQDWVVERCNRLCDAL YFCYTQAPETRQTFVTLVRGLELARQHSSPAFQPMLYNLLQLLTQLHEANVYLCPGYL HFSAYKLLKKIQSVSDARERGEFGDEDEEQENDGEPREAQLDLEADPTAREGELFFFS …
48432	SNV	A	G	0.0450775	6	13	46.1538	2	17	11.7647		-
48455..48456	MNV	GC	AT	0.0450775	6	13	46.1538	2	17	11.7647		-
48664	SNV	C	T	0.0450775	6	13	46.1538	2	17	11.7647		No	UL36	HHV5wtgp041	inhibitor of caspase-8-induced apoptosis; involved in apoptosis; US22 family	tegument protein vICA	AAR31601.1	GI:39842057	MDDLRDTLMAYGCIAIRAGDFNGLNDFLEQECGTRLHVAWPERC FIQLRSRSALGPFVGKMGTVCSQGAYVCCQEYLHPFGFVEGPGFMRYQLIVLIGQRGG IYCYDDLRDCIYELAPTMKDFLRHGFRHCDHFHTMRDYQRPMVQYDDYWNAVMLYRGD VESLSAEVTKRGYASYSIDDPFDECPDTHFAFWTHNTEVMKFKETSFSVVRAGGSIQT MELMIRTVPRITCYHQLLGALGHEVPERKEFLVRQYVLVDTFGVVYGYDPAMDAVYRL AEDVVMFTCVMGKKGHRNHRFSGRREAIVRLEKTPTCQHPKKTPDPMIMFDEDDDDEL SLPRNVMTHEEAESRLYDAITENLMHCVKLVTTDSPLATHLWPQELQALCDSPALSLC …
48745	SNV	G	A	0.0450775	6	13	46.1538	2	17	11.7647		No	UL36	HHV5wtgp041	inhibitor of caspase-8-induced apoptosis; involved in apoptosis; US22 family	tegument protein vICA	AAR31601.1	GI:39842057	MDDLRDTLMAYGCIAIRAGDFNGLNDFLEQECGTRLHVAWPERC FIQLRSRSALGPFVGKMGTVCSQGAYVCCQEYLHPFGFVEGPGFMRYQLIVLIGQRGG IYCYDDLRDCIYELAPTMKDFLRHGFRHCDHFHTMRDYQRPMVQYDDYWNAVMLYRGD VESLSAEVTKRGYASYSIDDPFDECPDTHFAFWTHNTEVMKFKETSFSVVRAGGSIQT MELMIRTVPRITCYHQLLGALGHEVPERKEFLVRQYVLVDTFGVVYGYDPAMDAVYRL AEDVVMFTCVMGKKGHRNHRFSGRREAIVRLEKTPTCQHPKKTPDPMIMFDEDDDDEL SLPRNVMTHEEAESRLYDAITENLMHCVKLVTTDSPLATHLWPQELQALCDSPALSLC …
48988	SNV	G	A	0.0415003	8	13	61.5385	4	17	23.5294		No	UL36	HHV5wtgp041	inhibitor of caspase-8-induced apoptosis; involved in apoptosis; US22 family	tegument protein vICA	AAR31601.1	GI:39842057	MDDLRDTLMAYGCIAIRAGDFNGLNDFLEQECGTRLHVAWPERC FIQLRSRSALGPFVGKMGTVCSQGAYVCCQEYLHPFGFVEGPGFMRYQLIVLIGQRGG IYCYDDLRDCIYELAPTMKDFLRHGFRHCDHFHTMRDYQRPMVQYDDYWNAVMLYRGD VESLSAEVTKRGYASYSIDDPFDECPDTHFAFWTHNTEVMKFKETSFSVVRAGGSIQT MELMIRTVPRITCYHQLLGALGHEVPERKEFLVRQYVLVDTFGVVYGYDPAMDAVYRL AEDVVMFTCVMGKKGHRNHRFSGRREAIVRLEKTPTCQHPKKTPDPMIMFDEDDDDEL SLPRNVMTHEEAESRLYDAITENLMHCVKLVTTDSPLATHLWPQELQALCDSPALSLC …
49330	SNV	G	A	0.0450775	6	13	46.1538	2	17	11.7647		No	UL36	HHV5wtgp041	inhibitor of caspase-8-induced apoptosis; involved in apoptosis; US22 family	tegument protein vICA	AAR31601.1	GI:39842057	MDDLRDTLMAYGCIAIRAGDFNGLNDFLEQECGTRLHVAWPERC FIQLRSRSALGPFVGKMGTVCSQGAYVCCQEYLHPFGFVEGPGFMRYQLIVLIGQRGG IYCYDDLRDCIYELAPTMKDFLRHGFRHCDHFHTMRDYQRPMVQYDDYWNAVMLYRGD VESLSAEVTKRGYASYSIDDPFDECPDTHFAFWTHNTEVMKFKETSFSVVRAGGSIQT MELMIRTVPRITCYHQLLGALGHEVPERKEFLVRQYVLVDTFGVVYGYDPAMDAVYRL AEDVVMFTCVMGKKGHRNHRFSGRREAIVRLEKTPTCQHPKKTPDPMIMFDEDDDDEL SLPRNVMTHEEAESRLYDAITENLMHCVKLVTTDSPLATHLWPQELQALCDSPALSLC …
49453	SNV	G	A	0.0397373	5	13	38.4615	1	17	5.88235		No	UL36	HHV5wtgp041	inhibitor of caspase-8-induced apoptosis; involved in apoptosis; US22 family	tegument protein vICA	AAR31601.1	GI:39842057	MDDLRDTLMAYGCIAIRAGDFNGLNDFLEQECGTRLHVAWPERC FIQLRSRSALGPFVGKMGTVCSQGAYVCCQEYLHPFGFVEGPGFMRYQLIVLIGQRGG IYCYDDLRDCIYELAPTMKDFLRHGFRHCDHFHTMRDYQRPMVQYDDYWNAVMLYRGD VESLSAEVTKRGYASYSIDDPFDECPDTHFAFWTHNTEVMKFKETSFSVVRAGGSIQT MELMIRTVPRITCYHQLLGALGHEVPERKEFLVRQYVLVDTFGVVYGYDPAMDAVYRL AEDVVMFTCVMGKKGHRNHRFSGRREAIVRLEKTPTCQHPKKTPDPMIMFDEDDDDEL SLPRNVMTHEEAESRLYDAITENLMHCVKLVTTDSPLATHLWPQELQALCDSPALSLC …
53868	SNV	A	G	0.0397373	5	13	38.4615	1	17	5.88235		No	UL40	HHV5wtgp044	type 1 membrane protein; sequence in signal peptide inhibits NK cell cytotoxicity; upregulates cell surface expression of HLA-E; acts on inhibitory receptor CD94/NKG2A; involved in immune regulation	membrane glycoprotein UL40	AAR31604.1	GI:39842060	MNKFSNTRIGFTCAVMAPRTLILTVGLLCMRIRSLLSSPVETTV TTAGVTSAHGPLCPLVFQGWAYAVYHQGDMVLMTLDVYCCRQTSSNTVVAFSHHPADN TLLIEVGNNTRRHVDGISCQDHFRAQHQDCPAQTVHVRGVNESAFGLTHLQSCCLNEH SQLSERVAYHLKLRPATFGLETWAMYTVGILALGSFSSFYSQIARSLGVLPNDHHYAL KKA
54425	SNV	C	T	0.0450775	6	13	46.1538	2	17	11.7647		No	UL41A	HHV5wtgp045	contains potential transmembrane domain	protein UL41A	AAR31605.1	GI:39842061	MTLFCRTANSTAGYVDMNVCIGMIGVVCFVFGVFILIFCSTLKA FYVRQKTYHLLGTESDDEETTVWEKRRMESDTDF
59326	SNV	C	T	0.0450775	7	13	53.8462	3	17	17.6471		No	UL45	HHV5wtgp049	enzymatically inactive; tegument protein	ribonucleotide reductase subunit 1	AAR31609.1	GI:39842065	MNPADADEEQRVSSVPAHRCRPGRIPSRSAETETEESSAEVAAD TIGGDDSELEEGPLPGGDKEASAGNTNVSSGVACVAGFTSGGGVVSWRPESPSPDGTP SVLSLTRDSGPAVPSRGGRVSSGLSTFNPAGATRMELDSVEEEDDFGASLCKVSPPIQ AMRMLMGKKCHCHGYWGKFRFCGVQEPARELPSDRNALWREMDTVSRHSAGLGSFRLF QLIMRHGPCLIRHSPRCDLLLGRFYFKANWARESRTPLCYASELCDESVRRFVLRHME DLPKLAEETARFVELAGCWGLYAAILCLDKVCRQLHGQDESPGGVFLRIAVALTAAIE NSRHSRIYRFHLDARFEGEVLESVLKRCRDGQLSLSTFTMSTVGFDRVPQYDFLISAD …
67714	SNV	C	T	0.0397373	5	13	38.4615	1	17	5.88235		No	UL48	HHV5wtgp052	complexed with tegument protein UL37; ubiquitin-specific protease (N-terminal region); involved in capsid transport	large tegument protein	AAR31613.1	GI:39842069	MKVTQASCHQGDIARFGARAGNQCVCNGIMFLHALHLGGTSAVL QTEALDAIMEEGARLDARLERELQKKLPAGGRLPVYRLGDEVPRRLESRFGRTVHALS RPFNGTTETCDLDGYMCPGIFDFLRYAHAKPRPTYVLVTVNSLARAVVFTEDHMLVFD PHSSAECHNAAVYHCEGLHQVLMVLTGFGVQLSPAFYYEALFLYMLDVATVPEAEIAA RLVSTYRDRDIDLTGVVRESADTAATTTTAAPSLPPLPDPIVDPGCPPGVAPSIPVYD PSSSPKKTPEKRRKDLSGSKHGGKKKPPSTTSKTLATASSSPSAIAAASSSSAVPPSY SCGEGALPALGRYQQLVDEVEQELKALTLPPLPANTSAWTLHAAGTESGANAATATAP …
67735	SNV	C	T	0.0397373	5	13	38.4615	1	17	5.88235		No	UL48	HHV5wtgp052	complexed with tegument protein UL37; ubiquitin-specific protease (N-terminal region); involved in capsid transport	large tegument protein	AAR31613.1	GI:39842069	MKVTQASCHQGDIARFGARAGNQCVCNGIMFLHALHLGGTSAVL QTEALDAIMEEGARLDARLERELQKKLPAGGRLPVYRLGDEVPRRLESRFGRTVHALS RPFNGTTETCDLDGYMCPGIFDFLRYAHAKPRPTYVLVTVNSLARAVVFTEDHMLVFD PHSSAECHNAAVYHCEGLHQVLMVLTGFGVQLSPAFYYEALFLYMLDVATVPEAEIAA RLVSTYRDRDIDLTGVVRESADTAATTTTAAPSLPPLPDPIVDPGCPPGVAPSIPVYD PSSSPKKTPEKRRKDLSGSKHGGKKKPPSTTSKTLATASSSPSAIAAASSSSAVPPSY SCGEGALPALGRYQQLVDEVEQELKALTLPPLPANTSAWTLHAAGTESGANAATATAP …
67985	SNV	A	G	0.0450775	7	13	53.8462	3	17	17.6471	AAR31613.1:p.Ile1121Val	Yes	UL48	HHV5wtgp052	complexed with tegument protein UL37; ubiquitin-specific protease (N-terminal region); involved in capsid transport	large tegument protein	AAR31613.1	GI:39842069	MKVTQASCHQGDIARFGARAGNQCVCNGIMFLHALHLGGTSAVL QTEALDAIMEEGARLDARLERELQKKLPAGGRLPVYRLGDEVPRRLESRFGRTVHALS RPFNGTTETCDLDGYMCPGIFDFLRYAHAKPRPTYVLVTVNSLARAVVFTEDHMLVFD PHSSAECHNAAVYHCEGLHQVLMVLTGFGVQLSPAFYYEALFLYMLDVATVPEAEIAA RLVSTYRDRDIDLTGVVRESADTAATTTTAAPSLPPLPDPIVDPGCPPGVAPSIPVYD PSSSPKKTPEKRRKDLSGSKHGGKKKPPSTTSKTLATASSSPSAIAAASSSSAVPPSY SCGEGALPALGRYQQLVDEVEQELKALTLPPLPANTSAWTLHAAGTESGANAATATAP …
68310	SNV	C	T	0.0397373	5	13	38.4615	1	17	5.88235	AAR31613.1:p.Ala1229Val	Yes	UL48	HHV5wtgp052	complexed with tegument protein UL37; ubiquitin-specific protease (N-terminal region); involved in capsid transport	large tegument protein	AAR31613.1	GI:39842069	MKVTQASCHQGDIARFGARAGNQCVCNGIMFLHALHLGGTSAVL QTEALDAIMEEGARLDARLERELQKKLPAGGRLPVYRLGDEVPRRLESRFGRTVHALS RPFNGTTETCDLDGYMCPGIFDFLRYAHAKPRPTYVLVTVNSLARAVVFTEDHMLVFD PHSSAECHNAAVYHCEGLHQVLMVLTGFGVQLSPAFYYEALFLYMLDVATVPEAEIAA RLVSTYRDRDIDLTGVVRESADTAATTTTAAPSLPPLPDPIVDPGCPPGVAPSIPVYD PSSSPKKTPEKRRKDLSGSKHGGKKKPPSTTSKTLATASSSPSAIAAASSSSAVPPSY SCGEGALPALGRYQQLVDEVEQELKALTLPPLPANTSAWTLHAAGTESGANAATATAP …
73663..73664	MNV	TG	CA	0.0151724	6	13	46.1538	1	17	5.88235	AAR31616.1:p.Ile298Val	Yes	UL50	HHV5wtgp055	type 2 membrane protein; interacts with nuclear egress lamina protein; involved in nuclear egress	nuclear egress membrane protein	AAR31616.1	GI:39842072	MEMNKVLHQDLVQATRRILKLGPSELRVTDAGLICKNPNYSVCD AMLKTDTVYCVEYLLSYWESRTDHVPCFIFKNTGCAVSLCCFVRAPVKLVSPARHVGE FNVLKVNESLIVTLKDIEEIKPSAYGVLTKCVVRKSNSASVFNIELIAFGPENEGEYE NLLRELYAKKAASTSLAVRNHVTVSSHSGSGPSLWRARMSAALTRTAGKRSPRTASPP PPPPRHPSCSPTMVAAGGAAAGPRPPPPPMAAGSWRLCRCEACMGRCGCASEGDADEE EEELLALAGEGKAAAAAAGQDIGGSARRPLEEHVSRRRGVSTHHRHPPSPPCTPSLER TGYRWAPSSWWRARSGPSRPQSGPWLPARFATLGPLVLALLLVLALLWRGHGQSSSPT …
78721	SNV	A	G	0.0450775	6	13	46.1538	2	17	11.7647		No	UL54	HHV5wtgp059	involved in DNA replication	DNA polymerase catalytic subunit	AAR31619.1	GI:39842075	MFFNPYLSGGVTGGAVAGGRRQRSQPGSAQGSGKRPPQKQFLQI VPRGVMFDGQTGLIKHKTGRLPLMFYREIKHLLSHDMVWPCPWRETLVGRVVGPIRFH TYDQTDAVLFFDSPENVSPRYRQHLVPSGNVLRFFGATEHGYSICVNVFGQRSYFYCE YSDTDRLREVIASVGELVPEPRTPYAVSVTPATKTSIYGYGTRPVPDLQCVSISNWTM ARKIGEYLLEQGFPVYEVRVDPLTRLVIDRRITTFGWCSVNRYDWRQQGRASTCDIEV DCDVSDLVAVPDDSSWPRYRCLSFDIECMSGEGGFPCAEKSDDIVIQISCVCYETGGN TAVDQGIPNGNDGRGCTSEGVIFGHSGLHLFTIGTCGQVGPDVDVYEFPSEYELLLGF …
78737	SNV	A	G	0.0450775	6	13	46.1538	2	17	11.7647		No	UL54	HHV5wtgp059	involved in DNA replication	DNA polymerase catalytic subunit	AAR31619.1	GI:39842075	MFFNPYLSGGVTGGAVAGGRRQRSQPGSAQGSGKRPPQKQFLQI VPRGVMFDGQTGLIKHKTGRLPLMFYREIKHLLSHDMVWPCPWRETLVGRVVGPIRFH TYDQTDAVLFFDSPENVSPRYRQHLVPSGNVLRFFGATEHGYSICVNVFGQRSYFYCE YSDTDRLREVIASVGELVPEPRTPYAVSVTPATKTSIYGYGTRPVPDLQCVSISNWTM ARKIGEYLLEQGFPVYEVRVDPLTRLVIDRRITTFGWCSVNRYDWRQQGRASTCDIEV DCDVSDLVAVPDDSSWPRYRCLSFDIECMSGEGGFPCAEKSDDIVIQISCVCYETGGN TAVDQGIPNGNDGRGCTSEGVIFGHSGLHLFTIGTCGQVGPDVDVYEFPSEYELLLGF …
78808	SNV	G	A	0.0450775	6	13	46.1538	2	17	11.7647		No	UL54	HHV5wtgp059	involved in DNA replication	DNA polymerase catalytic subunit	AAR31619.1	GI:39842075	MFFNPYLSGGVTGGAVAGGRRQRSQPGSAQGSGKRPPQKQFLQI VPRGVMFDGQTGLIKHKTGRLPLMFYREIKHLLSHDMVWPCPWRETLVGRVVGPIRFH TYDQTDAVLFFDSPENVSPRYRQHLVPSGNVLRFFGATEHGYSICVNVFGQRSYFYCE YSDTDRLREVIASVGELVPEPRTPYAVSVTPATKTSIYGYGTRPVPDLQCVSISNWTM ARKIGEYLLEQGFPVYEVRVDPLTRLVIDRRITTFGWCSVNRYDWRQQGRASTCDIEV DCDVSDLVAVPDDSSWPRYRCLSFDIECMSGEGGFPCAEKSDDIVIQISCVCYETGGN TAVDQGIPNGNDGRGCTSEGVIFGHSGLHLFTIGTCGQVGPDVDVYEFPSEYELLLGF …
78815	SNV	C	T	0.0450775	6	13	46.1538	2	17	11.7647		No	UL54	HHV5wtgp059	involved in DNA replication	DNA polymerase catalytic subunit	AAR31619.1	GI:39842075	MFFNPYLSGGVTGGAVAGGRRQRSQPGSAQGSGKRPPQKQFLQI VPRGVMFDGQTGLIKHKTGRLPLMFYREIKHLLSHDMVWPCPWRETLVGRVVGPIRFH TYDQTDAVLFFDSPENVSPRYRQHLVPSGNVLRFFGATEHGYSICVNVFGQRSYFYCE YSDTDRLREVIASVGELVPEPRTPYAVSVTPATKTSIYGYGTRPVPDLQCVSISNWTM ARKIGEYLLEQGFPVYEVRVDPLTRLVIDRRITTFGWCSVNRYDWRQQGRASTCDIEV DCDVSDLVAVPDDSSWPRYRCLSFDIECMSGEGGFPCAEKSDDIVIQISCVCYETGGN TAVDQGIPNGNDGRGCTSEGVIFGHSGLHLFTIGTCGQVGPDVDVYEFPSEYELLLGF …
78848	SNV	T	C	0.0450775	6	13	46.1538	2	17	11.7647		No	UL54	HHV5wtgp059	involved in DNA replication	DNA polymerase catalytic subunit	AAR31619.1	GI:39842075	MFFNPYLSGGVTGGAVAGGRRQRSQPGSAQGSGKRPPQKQFLQI VPRGVMFDGQTGLIKHKTGRLPLMFYREIKHLLSHDMVWPCPWRETLVGRVVGPIRFH TYDQTDAVLFFDSPENVSPRYRQHLVPSGNVLRFFGATEHGYSICVNVFGQRSYFYCE YSDTDRLREVIASVGELVPEPRTPYAVSVTPATKTSIYGYGTRPVPDLQCVSISNWTM ARKIGEYLLEQGFPVYEVRVDPLTRLVIDRRITTFGWCSVNRYDWRQQGRASTCDIEV DCDVSDLVAVPDDSSWPRYRCLSFDIECMSGEGGFPCAEKSDDIVIQISCVCYETGGN TAVDQGIPNGNDGRGCTSEGVIFGHSGLHLFTIGTCGQVGPDVDVYEFPSEYELLLGF …
83414	SNV	T	C	0.0178911	8	13	61.5385	3	17	17.6471	AAR31620.1:p.Lys459Arg	Yes	UL55	HHV5wtgp060	type 1 membrane protein; possible membrane fusogen; binds cell surface heparan sulphate; involved in cell entry; involved in cell-to-cell spread	envelope glycoprotein B	AAR31620.1	GI:39842076	MESRIWCLVVCVNLCIVCLGAAVSSSSTRGTSATHSHHSSHTTS AAHSRSGSVSQRVTSSQTVSHGVNETIYNTTLKYGDVVGVNTTKYPYRVCSMAQGTDL IRFERNIVCTSMKPINEDLDEGIMVVYKRNIVAHTFKVRVYQKVLTFRRSYAYIHTTY LLGSNTEYVAPPMWEIHHINSHSQCYSSYSRVIAGTVFVAYHRDSYENKTMQLMPDDY SNTHSTRYVTVKDQWHSRGSTWLYRETCNLNCMVTITTARSKYPYHFFATSTGDVVDI SPFYNGTNRNASYFGENADKFFIFPNYTIVSDFGRPNSALETHRLVAFLERADSVISW DIQDEKNVTCQLTFWEASERTIRSEAEDSYHFSSAKMTATFLSKKQEVNMSDSALDCV …
83446	SNV	G	T	0.0397373	5	13	38.4615	1	17	5.88235		No	UL55	HHV5wtgp060	type 1 membrane protein; possible membrane fusogen; binds cell surface heparan sulphate; involved in cell entry; involved in cell-to-cell spread	envelope glycoprotein B	AAR31620.1	GI:39842076	MESRIWCLVVCVNLCIVCLGAAVSSSSTRGTSATHSHHSSHTTS AAHSRSGSVSQRVTSSQTVSHGVNETIYNTTLKYGDVVGVNTTKYPYRVCSMAQGTDL IRFERNIVCTSMKPINEDLDEGIMVVYKRNIVAHTFKVRVYQKVLTFRRSYAYIHTTY LLGSNTEYVAPPMWEIHHINSHSQCYSSYSRVIAGTVFVAYHRDSYENKTMQLMPDDY SNTHSTRYVTVKDQWHSRGSTWLYRETCNLNCMVTITTARSKYPYHFFATSTGDVVDI SPFYNGTNRNASYFGENADKFFIFPNYTIVSDFGRPNSALETHRLVAFLERADSVISW DIQDEKNVTCQLTFWEASERTIRSEAEDSYHFSSAKMTATFLSKKQEVNMSDSALDCV …
83518	SNV	A	G	0.0178911	8	13	61.5385	3	17	17.6471		No	UL55	HHV5wtgp060	type 1 membrane protein; possible membrane fusogen; binds cell surface heparan sulphate; involved in cell entry; involved in cell-to-cell spread	envelope glycoprotein B	AAR31620.1	GI:39842076	MESRIWCLVVCVNLCIVCLGAAVSSSSTRGTSATHSHHSSHTTS AAHSRSGSVSQRVTSSQTVSHGVNETIYNTTLKYGDVVGVNTTKYPYRVCSMAQGTDL IRFERNIVCTSMKPINEDLDEGIMVVYKRNIVAHTFKVRVYQKVLTFRRSYAYIHTTY LLGSNTEYVAPPMWEIHHINSHSQCYSSYSRVIAGTVFVAYHRDSYENKTMQLMPDDY SNTHSTRYVTVKDQWHSRGSTWLYRETCNLNCMVTITTARSKYPYHFFATSTGDVVDI SPFYNGTNRNASYFGENADKFFIFPNYTIVSDFGRPNSALETHRLVAFLERADSVISW DIQDEKNVTCQLTFWEASERTIRSEAEDSYHFSSAKMTATFLSKKQEVNMSDSALDCV …
83527	SNV	A	G	0.0278761	10	13	76.9231	6	17	35.2941		No	UL55	HHV5wtgp060	type 1 membrane protein; possible membrane fusogen; binds cell surface heparan sulphate; involved in cell entry; involved in cell-to-cell spread	envelope glycoprotein B	AAR31620.1	GI:39842076	MESRIWCLVVCVNLCIVCLGAAVSSSSTRGTSATHSHHSSHTTS AAHSRSGSVSQRVTSSQTVSHGVNETIYNTTLKYGDVVGVNTTKYPYRVCSMAQGTDL IRFERNIVCTSMKPINEDLDEGIMVVYKRNIVAHTFKVRVYQKVLTFRRSYAYIHTTY LLGSNTEYVAPPMWEIHHINSHSQCYSSYSRVIAGTVFVAYHRDSYENKTMQLMPDDY SNTHSTRYVTVKDQWHSRGSTWLYRETCNLNCMVTITTARSKYPYHFFATSTGDVVDI SPFYNGTNRNASYFGENADKFFIFPNYTIVSDFGRPNSALETHRLVAFLERADSVISW DIQDEKNVTCQLTFWEASERTIRSEAEDSYHFSSAKMTATFLSKKQEVNMSDSALDCV …
84295	SNV	G	A	0.0450775	7	13	53.8462	3	17	17.6471		No	UL55	HHV5wtgp060	type 1 membrane protein; possible membrane fusogen; binds cell surface heparan sulphate; involved in cell entry; involved in cell-to-cell spread	envelope glycoprotein B	AAR31620.1	GI:39842076	MESRIWCLVVCVNLCIVCLGAAVSSSSTRGTSATHSHHSSHTTS AAHSRSGSVSQRVTSSQTVSHGVNETIYNTTLKYGDVVGVNTTKYPYRVCSMAQGTDL IRFERNIVCTSMKPINEDLDEGIMVVYKRNIVAHTFKVRVYQKVLTFRRSYAYIHTTY LLGSNTEYVAPPMWEIHHINSHSQCYSSYSRVIAGTVFVAYHRDSYENKTMQLMPDDY SNTHSTRYVTVKDQWHSRGSTWLYRETCNLNCMVTITTARSKYPYHFFATSTGDVVDI SPFYNGTNRNASYFGENADKFFIFPNYTIVSDFGRPNSALETHRLVAFLERADSVISW DIQDEKNVTCQLTFWEASERTIRSEAEDSYHFSSAKMTATFLSKKQEVNMSDSALDCV …
84429	SNV	G	A	0.0450775	7	13	53.8462	3	17	17.6471		No	UL55	HHV5wtgp060	type 1 membrane protein; possible membrane fusogen; binds cell surface heparan sulphate; involved in cell entry; involved in cell-to-cell spread	envelope glycoprotein B	AAR31620.1	GI:39842076	MESRIWCLVVCVNLCIVCLGAAVSSSSTRGTSATHSHHSSHTTS AAHSRSGSVSQRVTSSQTVSHGVNETIYNTTLKYGDVVGVNTTKYPYRVCSMAQGTDL IRFERNIVCTSMKPINEDLDEGIMVVYKRNIVAHTFKVRVYQKVLTFRRSYAYIHTTY LLGSNTEYVAPPMWEIHHINSHSQCYSSYSRVIAGTVFVAYHRDSYENKTMQLMPDDY SNTHSTRYVTVKDQWHSRGSTWLYRETCNLNCMVTITTARSKYPYHFFATSTGDVVDI SPFYNGTNRNASYFGENADKFFIFPNYTIVSDFGRPNSALETHRLVAFLERADSVISW DIQDEKNVTCQLTFWEASERTIRSEAEDSYHFSSAKMTATFLSKKQEVNMSDSALDCV …
85664	SNV	T	C	0.0260901	4	13	30.7692	0	17	0		No	UL56	HHV5wtgp061	involved in DNA encapsidation	DNA packaging terminase subunit 2	AAR31621.1	GI:39842077	MEMNLLQKLCVVCSKCNEYAMELECLKYCDPNVLLAESTPFKRN AAAIVYLYRKIYPEVVAQNRTQSSLLTLYLEMLLKALHEDTALLDRALMAYSRQPDRA AFYRTVLRLDRCDRHHTVELQFTDNVRFSVSLATLNDIERFLCKMNYVYGILAPEAGL EVCAQLLELLRRLCGISPVARQEVYVEGTTCAQCYEELTIIPNQGRSLNKRLQGLLCN HIAVHRPSSQSDVNIQTVEQDLLDLTTRIPHLAGVLSALKSLFSSSSAYHSYIQEAEE ALREYNLFTDIPERIYSLSDFTYWSRTSEVIVKRVGITIQQLNVYHQLCRALMNGISR HLYGEDVEDIFVLGEKALDGEERMFVGSVFAAPNRIIDLITSLSIQAFEDNPVFNKLH …
99356	Deletion	A	-	0.0260901	4	13	30.7692	0	17	0		-
99392	SNV	T	C	0.0260901	4	13	30.7692	0	17	0		-
99457..99458	Deletion	TT	-	0.0473497	12	13	92.3077	10	17	58.8235		-
102462	SNV	A	G	0.0450775	7	13	53.8462	3	17	17.6471		No	UL70	HHV5wtgp064	involved in DNA replication	helicase-primase primase subunit	AAR31624.1	GI:39842080	MTLVLFATEYDSAHIVANVLSQTPTDHCVFPLLVKHQVSRRVYF CLQTQKCSDSRRVAPVFAVNNETLQLSRYLAARQPIPLSALIASLDEAETRPLYRHLF RTPVLSPEHGGEVREFKHLVYFHHAAVLRHLNQVFLCPTSPSWFISVFGHTEGQVLLT MAYYLFEGQYSTISTVEEYVRSFCTRDLGTIIPTHASMGEFARLLLGSPFRQRVSAFV AYAVARNRRDYTELEQVDTQINAFRERARLPDTVCVHYVYLAYRTALARARLLEYRRV VAYDADAAPEAQCTREPGFLGRRLSTELLDVMQKYFSLDNFLHDYVETHLLRLDESPH SATSPHGLGLAGYGGRIDGTHLAGFFGTSTQLARQLERINTLSESVFSPLERSLSGLL …
102705	SNV	C	T	0.0450775	7	13	53.8462	3	17	17.6471		No	UL70	HHV5wtgp064	involved in DNA replication	helicase-primase primase subunit	AAR31624.1	GI:39842080	MTLVLFATEYDSAHIVANVLSQTPTDHCVFPLLVKHQVSRRVYF CLQTQKCSDSRRVAPVFAVNNETLQLSRYLAARQPIPLSALIASLDEAETRPLYRHLF RTPVLSPEHGGEVREFKHLVYFHHAAVLRHLNQVFLCPTSPSWFISVFGHTEGQVLLT MAYYLFEGQYSTISTVEEYVRSFCTRDLGTIIPTHASMGEFARLLLGSPFRQRVSAFV AYAVARNRRDYTELEQVDTQINAFRERARLPDTVCVHYVYLAYRTALARARLLEYRRV VAYDADAAPEAQCTREPGFLGRRLSTELLDVMQKYFSLDNFLHDYVETHLLRLDESPH SATSPHGLGLAGYGGRIDGTHLAGFFGTSTQLARQLERINTLSESVFSPLERSLSGLL …
102735	SNV	G	A	0.0450775	7	13	53.8462	3	17	17.6471		No	UL70	HHV5wtgp064	involved in DNA replication	helicase-primase primase subunit	AAR31624.1	GI:39842080	MTLVLFATEYDSAHIVANVLSQTPTDHCVFPLLVKHQVSRRVYF CLQTQKCSDSRRVAPVFAVNNETLQLSRYLAARQPIPLSALIASLDEAETRPLYRHLF RTPVLSPEHGGEVREFKHLVYFHHAAVLRHLNQVFLCPTSPSWFISVFGHTEGQVLLT MAYYLFEGQYSTISTVEEYVRSFCTRDLGTIIPTHASMGEFARLLLGSPFRQRVSAFV AYAVARNRRDYTELEQVDTQINAFRERARLPDTVCVHYVYLAYRTALARARLLEYRRV VAYDADAAPEAQCTREPGFLGRRLSTELLDVMQKYFSLDNFLHDYVETHLLRLDESPH SATSPHGLGLAGYGGRIDGTHLAGFFGTSTQLARQLERINTLSESVFSPLERSLSGLL …
102774	SNV	C	T	0.0178911	7	13	53.8462	2	17	11.7647		No	UL70	HHV5wtgp064	involved in DNA replication	helicase-primase primase subunit	AAR31624.1	GI:39842080	MTLVLFATEYDSAHIVANVLSQTPTDHCVFPLLVKHQVSRRVYF CLQTQKCSDSRRVAPVFAVNNETLQLSRYLAARQPIPLSALIASLDEAETRPLYRHLF RTPVLSPEHGGEVREFKHLVYFHHAAVLRHLNQVFLCPTSPSWFISVFGHTEGQVLLT MAYYLFEGQYSTISTVEEYVRSFCTRDLGTIIPTHASMGEFARLLLGSPFRQRVSAFV AYAVARNRRDYTELEQVDTQINAFRERARLPDTVCVHYVYLAYRTALARARLLEYRRV VAYDADAAPEAQCTREPGFLGRRLSTELLDVMQKYFSLDNFLHDYVETHLLRLDESPH SATSPHGLGLAGYGGRIDGTHLAGFFGTSTQLARQLERINTLSESVFSPLERSLSGLL …
102869	SNV	C	T	0.0178911	8	13	61.5385	3	17	17.6471	AAR31624.1:p.Asp607Asn	Yes	UL70	HHV5wtgp064	involved in DNA replication	helicase-primase primase subunit	AAR31624.1	GI:39842080	MTLVLFATEYDSAHIVANVLSQTPTDHCVFPLLVKHQVSRRVYF CLQTQKCSDSRRVAPVFAVNNETLQLSRYLAARQPIPLSALIASLDEAETRPLYRHLF RTPVLSPEHGGEVREFKHLVYFHHAAVLRHLNQVFLCPTSPSWFISVFGHTEGQVLLT MAYYLFEGQYSTISTVEEYVRSFCTRDLGTIIPTHASMGEFARLLLGSPFRQRVSAFV AYAVARNRRDYTELEQVDTQINAFRERARLPDTVCVHYVYLAYRTALARARLLEYRRV VAYDADAAPEAQCTREPGFLGRRLSTELLDVMQKYFSLDNFLHDYVETHLLRLDESPH SATSPHGLGLAGYGGRIDGTHLAGFFGTSTQLARQLERINTLSESVFSPLERSLSGLL …
106361	SNV	T	C	0.0260901	4	13	30.7692	0	17	0		No	UL72	HHV5wtgp066	enzymatically inactive; DURP family	deoxyuridine triphosphatase	AAR31625.1	GI:39842081	MLTMLTDRIDSQLVLSRLPRSRFQRFWETPTLIMKEESAPSSGS IILAEKSVNMRYCVRFASDSDFQTTFTLPQSTEEKYDKEQHPGEDEASSPLPSPLKVP YKWMPSSFIVKQCHTQLAFYNKHIIWLSRERKVPTSLGVSLYIPEGFFGITFYKCLDA QFVCMPELLESGLQVPQLDVVNLNDTFQSIFPGTIEGDIGVFPCFVPEPWQLMNLPPP NEHRFFSLRTRQTLVIGPGHTQTVYFDAAYVHAPGICALIVGVRQFSQSDLIIRPTIW LPGTAAGVTVVNTSHTTVCISPHTTVAKAVFTTHRFTYLPVGSHPLGQMIVPPTPDIG FTHTPEHALLQRTPSPVDDDVDETEEDEKSSDAESPVNTSDVIFDVGPKPPRHP
106418	SNV	C	T	0.0260901	4	13	30.7692	0	17	0		No	UL72	HHV5wtgp066	enzymatically inactive; DURP family	deoxyuridine triphosphatase	AAR31625.1	GI:39842081	MLTMLTDRIDSQLVLSRLPRSRFQRFWETPTLIMKEESAPSSGS IILAEKSVNMRYCVRFASDSDFQTTFTLPQSTEEKYDKEQHPGEDEASSPLPSPLKVP YKWMPSSFIVKQCHTQLAFYNKHIIWLSRERKVPTSLGVSLYIPEGFFGITFYKCLDA QFVCMPELLESGLQVPQLDVVNLNDTFQSIFPGTIEGDIGVFPCFVPEPWQLMNLPPP NEHRFFSLRTRQTLVIGPGHTQTVYFDAAYVHAPGICALIVGVRQFSQSDLIIRPTIW LPGTAAGVTVVNTSHTTVCISPHTTVAKAVFTTHRFTYLPVGSHPLGQMIVPPTPDIG FTHTPEHALLQRTPSPVDDDVDETEEDEKSSDAESPVNTSDVIFDVGPKPPRHP
111733	SNV	C	T	0.0260901	4	13	30.7692	0	17	0		No	UL76	HHV5wtgp070		nuclear protein UL24	AAR31628.1	GI:39842084	MPSGCGDDADSTGNALRRLPHVRKRIGKRKHLDIYRRLLRVFPS FVALNRLLGGLFPPELQKYRRRLFIEVRLSRRIPDCVLVFLPPDSGSRGIVYCYVIEF KTTYSDADDQSVRWHATHSLQYAEGLRQLKGALVDFDFLRLPRGGGQVWSVVPSLVFF QQKADRPSFYRAFRSGRFDLCTDSVLDYLGRRQDESVAHLLAATRRRLLRAARGKRAA LPRARASAVAGGRGGGNARRGLARGRAHGPGAQTVSASGAEGSGSQGTDLLRGSRRAR VRGGGAVEPAVRARRRTVAADAATTTVSSAFVVPRDRRGRSFRRPTRSL
117482	SNV	C	T	0.0415003	8	13	61.5385	4	17	23.5294	AAR31632.1:p.Ser328Leu	Yes	UL80	HHV5wtgp074	serine protease (N-terminal region); minor scaffold protein (remainder of protein, clipped near C terminus); involved in capsid morphogenesis	capsid maturation protease	AAR31632.1	GI:39842088	MTMDEQQSQAVAPVYVGGFLARYDQSPDEAELLLPRDVVEHWLH AQGQGQPSLSVALPLNINHDDTAVVGHVAAMQSVRDGLFCLGCVTSPRFLEIVRRASE KSELVSRGPVSPLQPDKVVEFLSGSYAGLSLSSRRCDDVEAATSLSGSETTPFKHVAL CSVGRRRGTLAVYGRDPEWVTQRFPDLTAADRDGLRAQWQRCGSTAVDASGDPFRSDS YGLLGNSVDALYIRERLPKLRYDKQLVGVTERESYVKASVSPEAACVIKAASAERSGD SRSQAATPAAGARVPSSSPSPPVEPPSPVQPPALPASPSVLPAESPPSLSPSEPAEAA SMSHPLSAAVPAATAPPGATVAGASPAVSSLAWPHDGVYLPKDAFFSLLGASRSAAPV …
132355	SNV	A	C	0.0415003	8	13	61.5385	4	17	23.5294		No	UL87	HHV5wtgp081	promotes accumulation of late transcripts	protein UL87	AAR31639.1	GI:39842095	MAGAAPRRLGCDALIVVGGSAMPRRVLHVPVHVRACNLTQELST GEDARFCRPRPVNVERVRAVFAALYRACPIHVRTEPERVKLVLGRLLLGPVAVPCFCD GEVEGHGEHLVPTTQFCRGPLLYVHRRCCCGSVTAGRALSYHVLENHVATHVLRGLLS LTEWNRELPSLFCDCPGGGGASGTEERYAMACLPRDLSLHLDDYPYLMVEIGRVLSVS EVDDYVTAVSGYLGEAAAPRIQVHYKLLFGLNVRPQAPCALDATRDFFLLELQKLWLG VEYHHEVTSEFFGRVLAQLHRDRARVMMALRLPEQTVCHLSTFVLSRFKRQVLYFKLQ VSYGKCRTGHADRSGGGGNGGNQGHHNLLCYRRLSVTFADTDTVWRNLFYVYYELARD …
132663	SNV	C	T	0.0450775	7	13	53.8462	3	17	17.6471		No	UL88	HHV5wtgp082		tegument protein UL88	AAR31640.1	GI:39842096	MMEAAAAAAAAFRPEERPTPGWHDAALLMDDGTVREHAFRNGPL SQLIRRVLPPPPDAEDDVVFASELCFYCSGRFNRRSSVFSIYWQKHSDLVYALTGITH CAKLVVECGQLGSSRLRWRDGDASGEERRGDDDSRDELYDVPGIYMIRVNDGGSTGPR HVIWPGTSVLWAPDVVITTVQRRISAARALVNTFRQYFFLLERRSHEELVLCPPEMEE RLAPLLQSATRGDSDMFDGVVASAYHRLRMSNIPRSSARLLEHCVGLAGAKKLLLLDV PRLENYFLCQVCLYELDEDEMGEEMLGMLAGKPEDAAVSGASGGFLLHRKTMKLAACL CLLLNSLHLHQEALEALDPPPPRVEENDLVNVVLRRYYRSHGGVQARTLAAARALLAD …
132681	SNV	C	A	0.0450775	7	13	53.8462	3	17	17.6471		No	UL88	HHV5wtgp082		tegument protein UL88	AAR31640.1	GI:39842096	MMEAAAAAAAAFRPEERPTPGWHDAALLMDDGTVREHAFRNGPL SQLIRRVLPPPPDAEDDVVFASELCFYCSGRFNRRSSVFSIYWQKHSDLVYALTGITH CAKLVVECGQLGSSRLRWRDGDASGEERRGDDDSRDELYDVPGIYMIRVNDGGSTGPR HVIWPGTSVLWAPDVVITTVQRRISAARALVNTFRQYFFLLERRSHEELVLCPPEMEE RLAPLLQSATRGDSDMFDGVVASAYHRLRMSNIPRSSARLLEHCVGLAGAKKLLLLDV PRLENYFLCQVCLYELDEDEMGEEMLGMLAGKPEDAAVSGASGGFLLHRKTMKLAACL CLLLNSLHLHQEALEALDPPPPRVEENDLVNVVLRRYYRSHGGVQARTLAAARALLAD …
134968	SNV	C	T	0.0450775	7	13	53.8462	3	17	17.6471		-
134975	SNV	G	T	0.0450775	7	13	53.8462	3	17	17.6471		-
143165	SNV	T	C	0.0473497	12	13	92.3077	10	17	58.8235		No	UL97	HHV5wtgp090	involved in protein phosphorylation; resistance to ganciclovir; high-level resistance to maribavir	tegument serine/threonine protein kinase	AAR31648.1	GI:39842104	MSSALRSRARSASLGTTTQGWDPPPLRRPSRARRRQWMREAAQA AAQAAVQAAQAAAAQVAQAHVDEDEVVDLMTDEAGGGVTTLTTLSSVSTTTVLGHATF SACVRSDVMRDGEKEDAASDKENQRRPVVPSTSSRGSAASGDGYHGLRCRETSAMWSF EYDRDGDVTSVRRALFTGGSDPSDSVSGVRGGRKRPLRPPLVSLARTPLCRRRVGGVD AVLEENDVELRAESQDSAVASGPGRVPQPLSGSSGEESATAVEADSTSHDDVHCTCSN DQIITTSIRGLTCDPRMFLRLTHPELCELSISYLLVYVPKEDDFCHKICYAVDMSDES YRLGQGSFGEVWPLDRYRVVKVARKHSETVLTVWMSGLIRTRAAGEQQQPPSLVGTGV …
143454	SNV	T	C	0.0237881	12	13	92.3077	9	17	52.9412		No	UL97	HHV5wtgp090	involved in protein phosphorylation; resistance to ganciclovir; high-level resistance to maribavir	tegument serine/threonine protein kinase	AAR31648.1	GI:39842104	MSSALRSRARSASLGTTTQGWDPPPLRRPSRARRRQWMREAAQA AAQAAVQAAQAAAAQVAQAHVDEDEVVDLMTDEAGGGVTTLTTLSSVSTTTVLGHATF SACVRSDVMRDGEKEDAASDKENQRRPVVPSTSSRGSAASGDGYHGLRCRETSAMWSF EYDRDGDVTSVRRALFTGGSDPSDSVSGVRGGRKRPLRPPLVSLARTPLCRRRVGGVD AVLEENDVELRAESQDSAVASGPGRVPQPLSGSSGEESATAVEADSTSHDDVHCTCSN DQIITTSIRGLTCDPRMFLRLTHPELCELSISYLLVYVPKEDDFCHKICYAVDMSDES YRLGQGSFGEVWPLDRYRVVKVARKHSETVLTVWMSGLIRTRAAGEQQQPPSLVGTGV …
145913	SNV	G	A	0.0450775	7	13	53.8462	3	17	17.6471	AAR31650.1:p.Gly70Ser	Yes	UL99	HHV5wtgp092	envelope-associated; involved in virion morphogenesis	myristylated tegument protein	AAR31650.1	GI:39842106	MGAELCKRICCEFGTTSGEPLKDALGRQVSLRSYDNIPPTSSSD EGEDDDDGEDDDNEERQQKLRLCGSGCGGNDSSSGSHREATHDGPKKNAVRSTFREDK APKPSKQSKKKKKPSKHHHHQQSSIMQETDDLDEEDTSIYLSPPPVPPVQVVAKRLPR PDTPRTPRQKKISQRPPTPGTKKPAASLPF
148226	SNV	T	C	0.0450775	7	13	53.8462	3	17	17.6471		No	UL102	HHV5wtgp094	involved in DNA replication	helicase-primase subunit	AAR31652.1	GI:39842108	MTAQPPLHHRHHPYTLFGTSCHLSWYGLLEASVPIVQCLFLDLG GGRAEPRLHTFVVRGDRLPPAEVRAVHRASYAALASAVTTDADERRRGLEQRSAVLAR VLLEGSALIRVLARTFTPVQIQTDASGVEILEAAPALGVETTALSNALSLFHVAKLVV IGSYPEVHEPRVVTHAAERVSEEYGTHAHKKLRRGYYAYDLAMSFRVGTHKYVLERDD EAVLARLFEVREVCFLRTCLRLVTPVGFVAVAVTDEQCCLLLQSAWTHLYDVLFRGFA GQPPLRDYLGPDLFETGAARSFFFPGFPPVPVYAVHGLHTLMRETALDAAAEVLSWCG LPDIVGSAGKLEVEPCALSLGVPEDEWQVFGTEAGGGAVRLNATAFRERPAGGDRRWL …
148238	SNV	A	G	0.0450775	7	13	53.8462	3	17	17.6471		No	UL102	HHV5wtgp094	involved in DNA replication	helicase-primase subunit	AAR31652.1	GI:39842108	MTAQPPLHHRHHPYTLFGTSCHLSWYGLLEASVPIVQCLFLDLG GGRAEPRLHTFVVRGDRLPPAEVRAVHRASYAALASAVTTDADERRRGLEQRSAVLAR VLLEGSALIRVLARTFTPVQIQTDASGVEILEAAPALGVETTALSNALSLFHVAKLVV IGSYPEVHEPRVVTHAAERVSEEYGTHAHKKLRRGYYAYDLAMSFRVGTHKYVLERDD EAVLARLFEVREVCFLRTCLRLVTPVGFVAVAVTDEQCCLLLQSAWTHLYDVLFRGFA GQPPLRDYLGPDLFETGAARSFFFPGFPPVPVYAVHGLHTLMRETALDAAAEVLSWCG LPDIVGSAGKLEVEPCALSLGVPEDEWQVFGTEAGGGAVRLNATAFRERPAGGDRRWL …
148245	SNV	C	T	0.0450775	7	13	53.8462	3	17	17.6471		No	UL102	HHV5wtgp094	involved in DNA replication	helicase-primase subunit	AAR31652.1	GI:39842108	MTAQPPLHHRHHPYTLFGTSCHLSWYGLLEASVPIVQCLFLDLG GGRAEPRLHTFVVRGDRLPPAEVRAVHRASYAALASAVTTDADERRRGLEQRSAVLAR VLLEGSALIRVLARTFTPVQIQTDASGVEILEAAPALGVETTALSNALSLFHVAKLVV IGSYPEVHEPRVVTHAAERVSEEYGTHAHKKLRRGYYAYDLAMSFRVGTHKYVLERDD EAVLARLFEVREVCFLRTCLRLVTPVGFVAVAVTDEQCCLLLQSAWTHLYDVLFRGFA GQPPLRDYLGPDLFETGAARSFFFPGFPPVPVYAVHGLHTLMRETALDAAAEVLSWCG LPDIVGSAGKLEVEPCALSLGVPEDEWQVFGTEAGGGAVRLNATAFRERPAGGDRRWL …
149831	SNV	A	G	0.0278761	10	13	76.9231	6	17	35.2941		No	UL102	HHV5wtgp094	involved in DNA replication	helicase-primase subunit	AAR31652.1	GI:39842108	MTAQPPLHHRHHPYTLFGTSCHLSWYGLLEASVPIVQCLFLDLG GGRAEPRLHTFVVRGDRLPPAEVRAVHRASYAALASAVTTDADERRRGLEQRSAVLAR VLLEGSALIRVLARTFTPVQIQTDASGVEILEAAPALGVETTALSNALSLFHVAKLVV IGSYPEVHEPRVVTHAAERVSEEYGTHAHKKLRRGYYAYDLAMSFRVGTHKYVLERDD EAVLARLFEVREVCFLRTCLRLVTPVGFVAVAVTDEQCCLLLQSAWTHLYDVLFRGFA GQPPLRDYLGPDLFETGAARSFFFPGFPPVPVYAVHGLHTLMRETALDAAAEVLSWCG LPDIVGSAGKLEVEPCALSLGVPEDEWQVFGTEAGGGAVRLNATAFRERPAGGDRRWL …
150044	SNV	T	C	0.00875212	11	13	84.6154	6	17	35.2941		No	UL102	HHV5wtgp094	involved in DNA replication	helicase-primase subunit	AAR31652.1	GI:39842108	MTAQPPLHHRHHPYTLFGTSCHLSWYGLLEASVPIVQCLFLDLG GGRAEPRLHTFVVRGDRLPPAEVRAVHRASYAALASAVTTDADERRRGLEQRSAVLAR VLLEGSALIRVLARTFTPVQIQTDASGVEILEAAPALGVETTALSNALSLFHVAKLVV IGSYPEVHEPRVVTHAAERVSEEYGTHAHKKLRRGYYAYDLAMSFRVGTHKYVLERDD EAVLARLFEVREVCFLRTCLRLVTPVGFVAVAVTDEQCCLLLQSAWTHLYDVLFRGFA GQPPLRDYLGPDLFETGAARSFFFPGFPPVPVYAVHGLHTLMRETALDAAAEVLSWCG LPDIVGSAGKLEVEPCALSLGVPEDEWQVFGTEAGGGAVRLNATAFRERPAGGDRRWL …
150056	SNV	T	C	0.0208429	13	13	100	11	17	64.7059		No	UL102	HHV5wtgp094	involved in DNA replication	helicase-primase subunit	AAR31652.1	GI:39842108	MTAQPPLHHRHHPYTLFGTSCHLSWYGLLEASVPIVQCLFLDLG GGRAEPRLHTFVVRGDRLPPAEVRAVHRASYAALASAVTTDADERRRGLEQRSAVLAR VLLEGSALIRVLARTFTPVQIQTDASGVEILEAAPALGVETTALSNALSLFHVAKLVV IGSYPEVHEPRVVTHAAERVSEEYGTHAHKKLRRGYYAYDLAMSFRVGTHKYVLERDD EAVLARLFEVREVCFLRTCLRLVTPVGFVAVAVTDEQCCLLLQSAWTHLYDVLFRGFA GQPPLRDYLGPDLFETGAARSFFFPGFPPVPVYAVHGLHTLMRETALDAAAEVLSWCG LPDIVGSAGKLEVEPCALSLGVPEDEWQVFGTEAGGGAVRLNATAFRERPAGGDRRWL …
150374	SNV	C	T	0.01947	11	13	84.6154	7	17	41.1765		No	UL102	HHV5wtgp094	involved in DNA replication	helicase-primase subunit	AAR31652.1	GI:39842108	MTAQPPLHHRHHPYTLFGTSCHLSWYGLLEASVPIVQCLFLDLG GGRAEPRLHTFVVRGDRLPPAEVRAVHRASYAALASAVTTDADERRRGLEQRSAVLAR VLLEGSALIRVLARTFTPVQIQTDASGVEILEAAPALGVETTALSNALSLFHVAKLVV IGSYPEVHEPRVVTHAAERVSEEYGTHAHKKLRRGYYAYDLAMSFRVGTHKYVLERDD EAVLARLFEVREVCFLRTCLRLVTPVGFVAVAVTDEQCCLLLQSAWTHLYDVLFRGFA GQPPLRDYLGPDLFETGAARSFFFPGFPPVPVYAVHGLHTLMRETALDAAAEVLSWCG LPDIVGSAGKLEVEPCALSLGVPEDEWQVFGTEAGGGAVRLNATAFRERPAGGDRRWL …
151975	SNV	C	G	0.0415003	8	13	61.5385	4	17	23.5294		No	UL104	HHV5wtgp096	dodecamer located at one capsid vertex in place of penton; involved in DNA encapsidation	capsid portal protein	AAR31654.1	GI:39842110	MERNHWNEKSSGAKRSRERDLTLSTIRSILAADERLRIKASSYL GVGRGVDDEAVIDIFPTGQTMSFLRLLHGFLGTCRGQSMHQVLRDPCVLRKQLLYGVC KTLFDTITVRRVAEEWKLHAALFPYRALDEEDLEQYLLVWSASLRQSVQTGVLGALRD ILYQYADNDDYGLYVDWCVTVGLVPLLDVKTKPSEAAERAQFVRAAVQRATETHPLAQ DLLQANLALLLQVAERLGAVRIANAPEVRVFKKVRSERLEAQLRGKHIRLYVAAEPLA YERDKLLFTTPVAHLHEEILRYDGLCRHQKICQLLNTFPVKVVTASRHELNCKKLVEM MEQHDRGSDAKKSIMKFLLNVSDSKSRIGIEDSVESFLQDLTPSLVDQNRLLPARGPG …
159249^159250	Insertion	-	T	0.0450775	7	13	53.8462	3	17	17.6471		-
165736	SNV	C	T	0.0415003	8	13	61.5385	4	17	23.5294		No	UL115	HHV5wtgp101	contains signal peptide; complexed with envelope glycoprotein H; involved in cell entry; involved in cell-to-cell spread	envelope glycoprotein L	AAR31659.1	GI:39842115	MCRRPDCGFSFSPGPVILLWCCLLLPIVSSAAVSVAPTAAEKVP AECPELTRRCLLGEVFEGDKYESWLRPLVNVTGRDGPLSQLIRYRPVTPEAANSVLLD EAFLDTLALLYNNPDQLRALLTLLSSDTAPRWMTVMRGYSECGDGSPAVYTCVDDLCR GYDLTRLSYGRSIFTEHVLGFELVPPSLFNVVVAIRNEATRTNRAVRLPVSTAAAPEG ITLFYGLYNAVKEFCLRHQLDPPLLRHLDKYYAGLPPELKQTRVNLPAHSRYGPQAVD AR
165832	SNV	G	T	0.0415003	8	13	61.5385	4	17	23.5294	AAR31659.1:p.Phe9Leu	Yes	UL115	HHV5wtgp101	contains signal peptide; complexed with envelope glycoprotein H; involved in cell entry; involved in cell-to-cell spread	envelope glycoprotein L	AAR31659.1	GI:39842115	MCRRPDCGFSFSPGPVILLWCCLLLPIVSSAAVSVAPTAAEKVP AECPELTRRCLLGEVFEGDKYESWLRPLVNVTGRDGPLSQLIRYRPVTPEAANSVLLD EAFLDTLALLYNNPDQLRALLTLLSSDTAPRWMTVMRGYSECGDGSPAVYTCVDDLCR GYDLTRLSYGRSIFTEHVLGFELVPPSLFNVVVAIRNEATRTNRAVRLPVSTAAAPEG ITLFYGLYNAVKEFCLRHQLDPPLLRHLDKYYAGLPPELKQTRVNLPAHSRYGPQAVD AR
166104	SNV	C	A	0.0415003	8	13	61.5385	4	17	23.5294		No	UL116	HHV5wtgp102	contains signal peptide	protein UL116	AAR31660.1	GI:39842116	MKRRRRWRGWLLFLALCFCLLCEAVETNATTVTSTTAAAATTNT TVATTGTTTTSPNVTSTTSNTVTTPTTVSSVSNLTSSATSILISTSTVSGTRNTRNNN TTTIGTNATSPSSSVSILTTVTPAATSTTSNNGDVTSDYTPTFDLENITTTRAPTRPP AQDLCSHNLSIILYEEESQSSVDIAVDEEEPELEDDDEYDELWFPLYFEAECNLNYTL QYVNHSCDYSVRQSSVSFPPWRDIDSVTFVPRNLSNCSAHGLAVIVAGNQTWYVNPFS LAHLLDAIYNVLGIEDLSANFWRQLAPYRHTLIVPQT
166511..166513	Deletion	TTC	-	0.0415003	8	13	61.5385	4	17	23.5294	AAR31660.1:p.Arg96del	Yes	UL116	HHV5wtgp102	contains signal peptide	protein UL116	AAR31660.1	GI:39842116	MKRRRRWRGWLLFLALCFCLLCEAVETNATTVTSTTAAAATTNT TVATTGTTTTSPNVTSTTSNTVTTPTTVSSVSNLTSSATSILISTSTVSGTRNTRNNN TTTIGTNATSPSSSVSILTTVTPAATSTTSNNGDVTSDYTPTFDLENITTTRAPTRPP AQDLCSHNLSIILYEEESQSSVDIAVDEEEPELEDDDEYDELWFPLYFEAECNLNYTL QYVNHSCDYSVRQSSVSFPPWRDIDSVTFVPRNLSNCSAHGLAVIVAGNQTWYVNPFS LAHLLDAIYNVLGIEDLSANFWRQLAPYRHTLIVPQT
166715..166716	MNV	CG	TA	0.0415003	8	13	61.5385	4	17	23.5294	AAR31660.1:p.Ala29Thr	Yes	UL116	HHV5wtgp102	contains signal peptide	protein UL116	AAR31660.1	GI:39842116	MKRRRRWRGWLLFLALCFCLLCEAVETNATTVTSTTAAAATTNT TVATTGTTTTSPNVTSTTSNTVTTPTTVSSVSNLTSSATSILISTSTVSGTRNTRNNN TTTIGTNATSPSSSVSILTTVTPAATSTTSNNGDVTSDYTPTFDLENITTTRAPTRPP AQDLCSHNLSIILYEEESQSSVDIAVDEEEPELEDDDEYDELWFPLYFEAECNLNYTL QYVNHSCDYSVRQSSVSFPPWRDIDSVTFVPRNLSNCSAHGLAVIVAGNQTWYVNPFS LAHLLDAIYNVLGIEDLSANFWRQLAPYRHTLIVPQT
174120	SNV	T	C	0.0208429	13	13	100	11	17	64.7059		-
174233	SNV	A	G	0.0434227	13	13	100	12	17	70.5882		No	UL124	HHV5wtgp109	type 1 membrane protein	membrane protein UL124	AAR31667.1	GI:39842123	MERNSLLVCQLLCLVARAAATSTAQTTLPSTVNSTATGVTSDSQ QNTTQLPASSAAALSLPSASAVQAHSPSSFSDTYPTATALCGTLVVVGIVLCLSLAST VRSKELPSDHEPLEAWEQGSDVEAPPLPEKSPCPEHVPEIRVEIPRYV
174252	SNV	C	T	0.0473497	12	13	92.3077	10	17	58.8235	AAR31667.1:p.Gln44*	Yes	UL124	HHV5wtgp109	type 1 membrane protein	membrane protein UL124	AAR31667.1	GI:39842123	MERNSLLVCQLLCLVARAAATSTAQTTLPSTVNSTATGVTSDSQ QNTTQLPASSAAALSLPSASAVQAHSPSSFSDTYPTATALCGTLVVVGIVLCLSLAST VRSKELPSDHEPLEAWEQGSDVEAPPLPEKSPCPEHVPEIRVEIPRYV
174254	SNV	A	T	0.0473497	12	13	92.3077	10	17	58.8235	AAR31667.1:p.Gln44His	Yes	UL124	HHV5wtgp109	type 1 membrane protein	membrane protein UL124	AAR31667.1	GI:39842123	MERNSLLVCQLLCLVARAAATSTAQTTLPSTVNSTATGVTSDSQ QNTTQLPASSAAALSLPSASAVQAHSPSSFSDTYPTATALCGTLVVVGIVLCLSLAST VRSKELPSDHEPLEAWEQGSDVEAPPLPEKSPCPEHVPEIRVEIPRYV
175959	SNV	T	C	0.0434227	13	13	100	12	17	70.5882		-
183669	SNV	A	G	0.0354823	9	13	69.2308	5	17	29.4118	AAR31678.1:p.Tyr219His	Yes	UL142	HHV5wtgp120	type 1 membrane protein; similar to MHC-I; inhibits NK cell cytotoxicity; downregulates MICA; acts on activating receptor NKG2D; involved in immune regulation; MHC family	membrane glycoprotein UL142	AAR31678.1	GI:39842134	MRIEWACWLFGYFVSSVGSERSLSYRYHLESNSSANVVCNGNIS VFVNGTLGVRYNITVGISSSLLIGHLTIQTLESWFTPWVQNKSYSKQPLSTTETLYNI DSENIHRVSQYFHTRWIKSLQENHTCDLTNSTPTYTYQANVNNTNYLTLTSSGWQDRL NYTAINSTHFNLTESNITSIHKYLNTTCIERLRNYTLEPVYTTAVPQNVTPEHAITTL YTTPPNAITIKDTTQSHTVQTPSFNDTHNVTEHTLNISYVLSQKTNNTTSPWVYAIPM GATATIGAGLYIGKHFTPVKFVYEVWRGQ
183693^183694	Insertion	-	T	0.0354823	9	13	69.2308	5	17	29.4118	AAR31678.1:p.Pro211fs	Yes	UL142	HHV5wtgp120	type 1 membrane protein; similar to MHC-I; inhibits NK cell cytotoxicity; downregulates MICA; acts on activating receptor NKG2D; involved in immune regulation; MHC family	membrane glycoprotein UL142	AAR31678.1	GI:39842134	MRIEWACWLFGYFVSSVGSERSLSYRYHLESNSSANVVCNGNIS VFVNGTLGVRYNITVGISSSLLIGHLTIQTLESWFTPWVQNKSYSKQPLSTTETLYNI DSENIHRVSQYFHTRWIKSLQENHTCDLTNSTPTYTYQANVNNTNYLTLTSSGWQDRL NYTAINSTHFNLTESNITSIHKYLNTTCIERLRNYTLEPVYTTAVPQNVTPEHAITTL YTTPPNAITIKDTTQSHTVQTPSFNDTHNVTEHTLNISYVLSQKTNNTTSPWVYAIPM GATATIGAGLYIGKHFTPVKFVYEVWRGQ
193526	SNV	T	C	0.0434227	13	13	100	12	17	70.5882		No	UL150, UL150A	HHV5wtgp132, HHV5wtgr005	contains signal peptide	protein UL150, protein UL150A	AAR31690.1, AEJ33669.1	GI:39842146, GI:338970389	MLTLYLFTATCCFVCALPRQAQVDTAICHHTWPMCSDVPHPTSS AHNTALSSSHAISIEHRLLHSPSPPRENIRHSMRCRRRAIASSASTPVSHTQPLAANH RRSRITYATTDPTNSPTASPAKSDKLEADADPALHRRPDSLLRHLFQPCHAQRGTSNR ATSQRASLNAVHHKLCGAMISSSWSTTCTPAIMDLPSLSVELSAGHKKKETPTEGGWG GEEGEDDVLATIRNTLSAPTSPAAATTHRLSFPEGSSFCLTAVSEYSQRLTSTAALTP PPPAVAAPFSFSSTVSETGAFPQSTAGRTRVDDTAVVTAGDPRSPVTHVTLLQIFRLR SSLLTSRSGDTLRGGEHEAIPKVASLFWTLLKATQTVEITHKTPSADSHRNPQKYTDR …
193561	SNV	A	G	0.0415003	8	13	61.5385	4	17	23.5294		No	UL150	HHV5wtgp132	contains signal peptide	protein UL150	AAR31690.1	GI:39842146	MLTLYLFTATCCFVCALPRQAQVDTAICHHTWPMCSDVPHPTSS AHNTALSSSHAISIEHRLLHSPSPPRENIRHSMRCRRRAIASSASTPVSHTQPLAANH RRSRITYATTDPTNSPTASPAKSDKLEADADPALHRRPDSLLRHLFQPCHAQRGTSNR ATSQRASLNAVHHKLCGAMISSSWSTTCTPAIMDLPSLSVELSAGHKKKETPTEGGWG GEEGEDDVLATIRNTLSAPTSPAAATTHRLSFPEGSSFCLTAVSEYSQRLTSTAALTP PPPAVAAPFSFSSTVSETGAFPQSTAGRTRVDDTAVVTAGDPRSPVTHVTLLQIFRLR SSLLTSRSGDTLRGGEHEAIPKVASLFWTLLKATQTVEITHKTPSADSHRNPQKYTDR …
193767	SNV	C	T	0.0159236	9	13	69.2308	4	17	23.5294	AAR31690.1:p.Arg165Lys; AEJ33669.1:p.Leu153Phe	Yes	UL150, UL150A	HHV5wtgp132, HHV5wtgr005	contains signal peptide	protein UL150, protein UL150A	AAR31690.1, AEJ33669.1	GI:39842146, GI:338970389	MLTLYLFTATCCFVCALPRQAQVDTAICHHTWPMCSDVPHPTSS AHNTALSSSHAISIEHRLLHSPSPPRENIRHSMRCRRRAIASSASTPVSHTQPLAANH RRSRITYATTDPTNSPTASPAKSDKLEADADPALHRRPDSLLRHLFQPCHAQRGTSNR ATSQRASLNAVHHKLCGAMISSSWSTTCTPAIMDLPSLSVELSAGHKKKETPTEGGWG GEEGEDDVLATIRNTLSAPTSPAAATTHRLSFPEGSSFCLTAVSEYSQRLTSTAALTP PPPAVAAPFSFSSTVSETGAFPQSTAGRTRVDDTAVVTAGDPRSPVTHVTLLQIFRLR SSLLTSRSGDTLRGGEHEAIPKVASLFWTLLKATQTVEITHKTPSADSHRNPQKYTDR …
193781	SNV	T	C	0.0415003	8	13	61.5385	4	17	23.5294		No	UL150, UL150A	HHV5wtgp132, HHV5wtgr005	contains signal peptide	protein UL150, protein UL150A	AAR31690.1, AEJ33669.1	GI:39842146, GI:338970389	MLTLYLFTATCCFVCALPRQAQVDTAICHHTWPMCSDVPHPTSS AHNTALSSSHAISIEHRLLHSPSPPRENIRHSMRCRRRAIASSASTPVSHTQPLAANH RRSRITYATTDPTNSPTASPAKSDKLEADADPALHRRPDSLLRHLFQPCHAQRGTSNR ATSQRASLNAVHHKLCGAMISSSWSTTCTPAIMDLPSLSVELSAGHKKKETPTEGGWG GEEGEDDVLATIRNTLSAPTSPAAATTHRLSFPEGSSFCLTAVSEYSQRLTSTAALTP PPPAVAAPFSFSSTVSETGAFPQSTAGRTRVDDTAVVTAGDPRSPVTHVTLLQIFRLR SSLLTSRSGDTLRGGEHEAIPKVASLFWTLLKATQTVEITHKTPSADSHRNPQKYTDR …
195151	Replacement	C	GTG	0.0450775	7	13	53.8462	3	17	17.6471		-
195155^195156	Insertion	-	GG	0.0450775	7	13	53.8462	3	17	17.6471		-
195159	SNV	G	T	0.0450775	7	13	53.8462	3	17	17.6471		-
204072	SNV	G	C	0.0397373	5	13	38.4615	1	17	5.88235	AAR31697.1:p.Asp27Glu	Yes	US8	HHV5wtgp139	type 1 membrane protein; binds to MHC-I; involved in immune regulation; US6 family	membrane glycoprotein US8	AAR31697.1	GI:39842153	MRRWLRLLVGLGCCWVTLAHAGNPYEDDDYYYYREDEPRQHGEP NYVAPPARQFRFPPLNNVSSYQASCVVKDGVLDAVWRVQGTFYPEKGIVARVGWSGRR GRKWGRLHAPECLVETTEAVFRLRQWVPTDLDHLTLHLVPCTKCKPMWCQPRYHIRYF SYGNSVDNLRRLHYEYRHLELGVVIAIQMAMVLLLGYVLARTVYRVSSAYYLRWHACV PQKCEKSLC
218093	SNV	T	C	0.0434227	13	13	100	12	17	70.5882		No	US23	HHV5wtgp154	US22 family	protein US23	AAR31712.1	GI:39842168	MWRTRWEDGAPTFTRNDEFLYCHTRYETFLRVMGDFQGIFECQY SADVLRDWVRNHVDQVLSLGIPHNWFLQVRPGSTMPELRDQLLDDVICCPERLIVLGK CVIMVDDHYEETELVLCMGGGTRLYIYEPSQEILLLCARHLDELARYGMMYTEAVYRQ PQTPFATRVPHDVVAMLLRHGHDTDALAACVGEHHGRDVNFHTPGRHAKTLKLLTSFG CLTDCWPFEVAPAARLAECEMYVTLQLRCRWYLLGAVGSYRAGGFFDTSFLIIFDRFC RFYVVIVKSHLDRSPPLQRLAGEIYRLADSLEELFRAGLMKVYVRRRYEHGLRRAARL ERNGGCVHMGEAARLHFTMFDSGVDRDYARQFRWLCRGDRFRAEMLNNWDGWDAFTIW …
218255	SNV	A	T	0.0208429	13	13	100	11	17	64.7059	AAR31712.1:p.Asp489Glu	Yes	US23	HHV5wtgp154	US22 family	protein US23	AAR31712.1	GI:39842168	MWRTRWEDGAPTFTRNDEFLYCHTRYETFLRVMGDFQGIFECQY SADVLRDWVRNHVDQVLSLGIPHNWFLQVRPGSTMPELRDQLLDDVICCPERLIVLGK CVIMVDDHYEETELVLCMGGGTRLYIYEPSQEILLLCARHLDELARYGMMYTEAVYRQ PQTPFATRVPHDVVAMLLRHGHDTDALAACVGEHHGRDVNFHTPGRHAKTLKLLTSFG CLTDCWPFEVAPAARLAECEMYVTLQLRCRWYLLGAVGSYRAGGFFDTSFLIIFDRFC RFYVVIVKSHLDRSPPLQRLAGEIYRLADSLEELFRAGLMKVYVRRRYEHGLRRAARL ERNGGCVHMGEAARLHFTMFDSGVDRDYARQFRWLCRGDRFRAEMLNNWDGWDAFTIW …
219287	SNV	T	C	0.0434227	13	13	100	12	17	70.5882		No	US23	HHV5wtgp154	US22 family	protein US23	AAR31712.1	GI:39842168	MWRTRWEDGAPTFTRNDEFLYCHTRYETFLRVMGDFQGIFECQY SADVLRDWVRNHVDQVLSLGIPHNWFLQVRPGSTMPELRDQLLDDVICCPERLIVLGK CVIMVDDHYEETELVLCMGGGTRLYIYEPSQEILLLCARHLDELARYGMMYTEAVYRQ PQTPFATRVPHDVVAMLLRHGHDTDALAACVGEHHGRDVNFHTPGRHAKTLKLLTSFG CLTDCWPFEVAPAARLAECEMYVTLQLRCRWYLLGAVGSYRAGGFFDTSFLIIFDRFC RFYVVIVKSHLDRSPPLQRLAGEIYRLADSLEELFRAGLMKVYVRRRYEHGLRRAARL ERNGGCVHMGEAARLHFTMFDSGVDRDYARQFRWLCRGDRFRAEMLNNWDGWDAFTIW …
219389	SNV	A	G	0.0434227	13	13	100	12	17	70.5882		No	US23	HHV5wtgp154	US22 family	protein US23	AAR31712.1	GI:39842168	MWRTRWEDGAPTFTRNDEFLYCHTRYETFLRVMGDFQGIFECQY SADVLRDWVRNHVDQVLSLGIPHNWFLQVRPGSTMPELRDQLLDDVICCPERLIVLGK CVIMVDDHYEETELVLCMGGGTRLYIYEPSQEILLLCARHLDELARYGMMYTEAVYRQ PQTPFATRVPHDVVAMLLRHGHDTDALAACVGEHHGRDVNFHTPGRHAKTLKLLTSFG CLTDCWPFEVAPAARLAECEMYVTLQLRCRWYLLGAVGSYRAGGFFDTSFLIIFDRFC RFYVVIVKSHLDRSPPLQRLAGEIYRLADSLEELFRAGLMKVYVRRRYEHGLRRAARL ERNGGCVHMGEAARLHFTMFDSGVDRDYARQFRWLCRGDRFRAEMLNNWDGWDAFTIW …
221391	SNV	G	A	0.0450775	7	13	53.8462	3	17	17.6471		-
221430	SNV	C	T	0.0450775	7	13	53.8462	3	17	17.6471		-
222009	SNV	T	C	0.01947	11	13	84.6154	7	17	41.1765	AAR31714.1:p.Thr587Ala	Yes	US26	HHV5wtgp156	US22 family	protein US26	AAR31714.1	GI:39842170	MRQSYRYASGAVVRRTLKGLRKLILCQDLRQDIRHLVRSYADMN ISLPVSAPPGWRLDFVEFEDIFGSAAVTDGPETPWGQLICCEESLESLGVLQFSTTVL PRVHGPRSSSEDEDSDDDDFFVYVEEIEPPSQARLVLLLGRYETVWCLDRDCGVLYYL AHSLDDFARHGLLHCEAIYGEQMRTPLLTTQPDHIICDLRLHDNSISELQRVTCRYRG ECVPLRTPGEMTRPLLLCGQAENLKGVWPFICMETEQFNDLLKFFVDRLCCETMIMGV VGESLPSGVFHADFVILVDRACEFFYFDVSRREIWRLADSVDMLLTVGLLKIYQAGRR FHYAVDDAERLEVPGRCPHENFPFWDRFGTVERVRASTRHHELRYKWLIRKDRFIVRP …
222231	SNV	T	C	0.0208429	13	13	100	11	17	64.7059	AAR31714.1:p.Lys513Glu	Yes	US26	HHV5wtgp156	US22 family	protein US26	AAR31714.1	GI:39842170	MRQSYRYASGAVVRRTLKGLRKLILCQDLRQDIRHLVRSYADMN ISLPVSAPPGWRLDFVEFEDIFGSAAVTDGPETPWGQLICCEESLESLGVLQFSTTVL PRVHGPRSSSEDEDSDDDDFFVYVEEIEPPSQARLVLLLGRYETVWCLDRDCGVLYYL AHSLDDFARHGLLHCEAIYGEQMRTPLLTTQPDHIICDLRLHDNSISELQRVTCRYRG ECVPLRTPGEMTRPLLLCGQAENLKGVWPFICMETEQFNDLLKFFVDRLCCETMIMGV VGESLPSGVFHADFVILVDRACEFFYFDVSRREIWRLADSVDMLLTVGLLKIYQAGRR FHYAVDDAERLEVPGRCPHENFPFWDRFGTVERVRASTRHHELRYKWLIRKDRFIVRP …
222735	SNV	G	A	0.0159236	9	13	69.2308	4	17	23.5294		No	US26	HHV5wtgp156	US22 family	protein US26	AAR31714.1	GI:39842170	MRQSYRYASGAVVRRTLKGLRKLILCQDLRQDIRHLVRSYADMN ISLPVSAPPGWRLDFVEFEDIFGSAAVTDGPETPWGQLICCEESLESLGVLQFSTTVL PRVHGPRSSSEDEDSDDDDFFVYVEEIEPPSQARLVLLLGRYETVWCLDRDCGVLYYL AHSLDDFARHGLLHCEAIYGEQMRTPLLTTQPDHIICDLRLHDNSISELQRVTCRYRG ECVPLRTPGEMTRPLLLCGQAENLKGVWPFICMETEQFNDLLKFFVDRLCCETMIMGV VGESLPSGVFHADFVILVDRACEFFYFDVSRREIWRLADSVDMLLTVGLLKIYQAGRR FHYAVDDAERLEVPGRCPHENFPFWDRFGTVERVRASTRHHELRYKWLIRKDRFIVRP …
222847	SNV	T	C	0.0126638	10	13	76.9231	5	17	29.4118		No	US26	HHV5wtgp156	US22 family	protein US26	AAR31714.1	GI:39842170	MRQSYRYASGAVVRRTLKGLRKLILCQDLRQDIRHLVRSYADMN ISLPVSAPPGWRLDFVEFEDIFGSAAVTDGPETPWGQLICCEESLESLGVLQFSTTVL PRVHGPRSSSEDEDSDDDDFFVYVEEIEPPSQARLVLLLGRYETVWCLDRDCGVLYYL AHSLDDFARHGLLHCEAIYGEQMRTPLLTTQPDHIICDLRLHDNSISELQRVTCRYRG ECVPLRTPGEMTRPLLLCGQAENLKGVWPFICMETEQFNDLLKFFVDRLCCETMIMGV VGESLPSGVFHADFVILVDRACEFFYFDVSRREIWRLADSVDMLLTVGLLKIYQAGRR FHYAVDDAERLEVPGRCPHENFPFWDRFGTVERVRASTRHHELRYKWLIRKDRFIVRP …
223252	SNV	C	T	0.00608643	9	13	69.2308	3	17	17.6471		No	US26	HHV5wtgp156	US22 family	protein US26	AAR31714.1	GI:39842170	MRQSYRYASGAVVRRTLKGLRKLILCQDLRQDIRHLVRSYADMN ISLPVSAPPGWRLDFVEFEDIFGSAAVTDGPETPWGQLICCEESLESLGVLQFSTTVL PRVHGPRSSSEDEDSDDDDFFVYVEEIEPPSQARLVLLLGRYETVWCLDRDCGVLYYL AHSLDDFARHGLLHCEAIYGEQMRTPLLTTQPDHIICDLRLHDNSISELQRVTCRYRG ECVPLRTPGEMTRPLLLCGQAENLKGVWPFICMETEQFNDLLKFFVDRLCCETMIMGV VGESLPSGVFHADFVILVDRACEFFYFDVSRREIWRLADSVDMLLTVGLLKIYQAGRR FHYAVDDAERLEVPGRCPHENFPFWDRFGTVERVRASTRHHELRYKWLIRKDRFIVRP …
223264	SNV	C	T	0.00505771	10	13	76.9231	4	17	23.5294		No	US26	HHV5wtgp156	US22 family	protein US26	AAR31714.1	GI:39842170	MRQSYRYASGAVVRRTLKGLRKLILCQDLRQDIRHLVRSYADMN ISLPVSAPPGWRLDFVEFEDIFGSAAVTDGPETPWGQLICCEESLESLGVLQFSTTVL PRVHGPRSSSEDEDSDDDDFFVYVEEIEPPSQARLVLLLGRYETVWCLDRDCGVLYYL AHSLDDFARHGLLHCEAIYGEQMRTPLLTTQPDHIICDLRLHDNSISELQRVTCRYRG ECVPLRTPGEMTRPLLLCGQAENLKGVWPFICMETEQFNDLLKFFVDRLCCETMIMGV VGESLPSGVFHADFVILVDRACEFFYFDVSRREIWRLADSVDMLLTVGLLKIYQAGRR FHYAVDDAERLEVPGRCPHENFPFWDRFGTVERVRASTRHHELRYKWLIRKDRFIVRP …
223989	SNV	T	C	0.0450775	7	13	53.8462	3	17	17.6471		-
224037	SNV	A	G	0.0450775	7	13	53.8462	3	17	17.6471		-
224459	SNV	C	T	0.0415003	8	13	61.5385	4	17	23.5294		No	US27	HHV5wtgp157	type 3 membrane protein; 7 transmembrane domains; putative chemokine receptor; possibly involved in intracellular signalling; GPCR family	envelope glycoprotein US27	AAR31715.1	GI:39842171	MTTSTTTTTNIMLQVSNVTNHTLNSTEIYQLFEYTRFGVWLMCI VGTFLNMLVITTILYYRRKKKSPSDTYICNLAVADLLIVVGLPFFLEYAKHHPKLSRE VVCSGLNACFYICLFAGVCFLINLSMDRYCVIVWGVELNRVRNNKRATCWVVIFWILA ALMGMPHYLMYSHTNNECVGEFANETSGWFPVFLNTKVNICGYLAPIVLMAYTYNRMV RFIINYVGKWHMQTLHVLLVVVVSFASFWFPFNLALFLESIRLLSGTQNETLQTVITF CLYVGQFLAYVRACLNPGIYILVGTQMRKDMWTTLRVFACCCVKQEIPYQDIDIELQK DIQRRAKHTKRTHYDRKHAPMESGEEEFLL
230191..230193	Deletion	AAC	-	0.0450775	6	13	46.1538	2	17	11.7647		-
