# Supplementary material for: Association of CMV genomic mutations with symptomatic infection and hearing loss in congenital CMV infection
Source: BMC Infect Dis. 2019 Dec 10;19:1046. doi: 10.1186/s12879-019-4681-0 (PMC6905059; doi:10.1186/s12879-019-4681-0)
Supplement: Supplementary file 7 — Additional file 7: Table S6. Table of CMV variants more common in asymptomatic children with SNHL. [file 12879_2019_4681_MOESM7_ESM.xlsx]

## Sheet: Fisher_asym_HL_asym_NOHL_rm...
Supplemental Table 6. Table of CMV variants more common in asymptomatic children with SNHL.
Region	Type	Reference	Allele	P-value	Sample count (case)	Total number of samples (case)	Sample frequency (case)	Sample count (control)	Total number of samples (control)	Sample frequency (control)	Amino acid change	Non-synonymous	gene (AY446894 (CDS))	locus_tag (AY446894 (CDS))	note (AY446894 (CDS))	product (AY446894 (CDS))	Protein id (AY446894 (CDS))	GI (AY446894 (CDS))	translation (AY446894 (CDS))
8706	SNV	G	A	0.0169683	6	6	100	4	11	36.3636	AAR31564.1:p.Ala36Thr	Yes	RL10	HHV5wtgp004	type 1 membrane protein; possibly related to RL11 family	envelope glycoprotein RL10	AAR31564.1	GI:39842020	MYPRVMHAVCFLALGLISYVAVCAENTVTTNCLVKAENTHLTCK CNPNTTSNTNNGSKCHAMCKCRVTEPITMLGAYSAWGAGSFVATLIVLLVVFFVIYAR EEEKNNTGTEVDQCLAYRSLTRKKLEQHAAKKQNIYERIPYRPSRQNDNSPLIEPTGT DDEEDEDDDV
8723	SNV	G	A	0.0429864	5	6	83.3333	3	11	27.2727		No	RL10	HHV5wtgp004	type 1 membrane protein; possibly related to RL11 family	envelope glycoprotein RL10	AAR31564.1	GI:39842020	MYPRVMHAVCFLALGLISYVAVCAENTVTTNCLVKAENTHLTCK CNPNTTSNTNNGSKCHAMCKCRVTEPITMLGAYSAWGAGSFVATLIVLLVVFFVIYAR EEEKNNTGTEVDQCLAYRSLTRKKLEQHAAKKQNIYERIPYRPSRQNDNSPLIEPTGT DDEEDEDDDV
12631	SNV	A	C	0.0294118	3	6	50	0	11	0	AAR31568.1:p.Asn153Thr	Yes	UL1	HHV5wtgp008	type 1 membrane protein; RL11 family	membrane protein UL1	AAR31568.1	GI:39842024	MGVQCNSKLLLLAVLITIILSSILVQAIPHKQKTSYQQLLLQSE HVQIPITVAEGDTICFNVSDNPCNFSSYWNHNNCELCGWTPFYSEYAGYSENKSCHPR FTCLHDTKGLKLHNVTTNDSGIYTRNVYYCDIPCNISDDHKHNVEDFDNCNTTINRTH YIITVSSSRYSKRTNSHVATHVGWTATVVIIICVLTYVNVTTTLKHRLRTRNNVNHTM
12746	SNV	T	A	0.00678733	6	6	100	3	11	27.2727		No	UL1	HHV5wtgp008	type 1 membrane protein; RL11 family	membrane protein UL1	AAR31568.1	GI:39842024	MGVQCNSKLLLLAVLITIILSSILVQAIPHKQKTSYQQLLLQSE HVQIPITVAEGDTICFNVSDNPCNFSSYWNHNNCELCGWTPFYSEYAGYSENKSCHPR FTCLHDTKGLKLHNVTTNDSGIYTRNVYYCDIPCNISDDHKHNVEDFDNCNTTINRTH YIITVSSSRYSKRTNSHVATHVGWTATVVIIICVLTYVNVTTTLKHRLRTRNNVNHTM
12749	SNV	C	T	0.0294118	3	6	50	0	11	0		No	UL1	HHV5wtgp008	type 1 membrane protein; RL11 family	membrane protein UL1	AAR31568.1	GI:39842024	MGVQCNSKLLLLAVLITIILSSILVQAIPHKQKTSYQQLLLQSE HVQIPITVAEGDTICFNVSDNPCNFSSYWNHNNCELCGWTPFYSEYAGYSENKSCHPR FTCLHDTKGLKLHNVTTNDSGIYTRNVYYCDIPCNISDDHKHNVEDFDNCNTTINRTH YIITVSSSRYSKRTNSHVATHVGWTATVVIIICVLTYVNVTTTLKHRLRTRNNVNHTM
12790	SNV	A	G	0.0429864	5	6	83.3333	3	11	27.2727	AAR31568.1:p.His206Arg	Yes	UL1	HHV5wtgp008	type 1 membrane protein; RL11 family	membrane protein UL1	AAR31568.1	GI:39842024	MGVQCNSKLLLLAVLITIILSSILVQAIPHKQKTSYQQLLLQSE HVQIPITVAEGDTICFNVSDNPCNFSSYWNHNNCELCGWTPFYSEYAGYSENKSCHPR FTCLHDTKGLKLHNVTTNDSGIYTRNVYYCDIPCNISDDHKHNVEDFDNCNTTINRTH YIITVSSSRYSKRTNSHVATHVGWTATVVIIICVLTYVNVTTTLKHRLRTRNNVNHTM
12834	SNV	C	T	0.0294118	3	6	50	0	11	0		-
12907	SNV	G	A	0.0294118	3	6	50	0	11	0		-
12941	SNV	A	C	0.0169683	6	6	100	4	11	36.3636		-
12949	SNV	A	G	0.0294118	3	6	50	0	11	0		-
12966..12967	MNV	GC	TT	0.0294118	3	6	50	0	11	0		-
12969	SNV	T	C	0.0169683	6	6	100	4	11	36.3636		-
13027	SNV	C	T	0.0294118	3	6	50	0	11	0		-
13185^13186	Insertion	-	C	0.0175339	5	6	83.3333	2	11	18.1818		-
13194	SNV	G	A	0.0429864	5	6	83.3333	3	11	27.2727		-
13235	SNV	C	T	0.0373303	6	6	100	5	11	45.4545		No	UL2	HHV5wtgp009	contains potential transmembrane domain	protein UL2	AAR31569.1	GI:39842025	MAEDSVTILIVEDDDAYPSFGSLPASHAQYGFRLLRSIFLIMLV IWTAVWLKLLRDALL
13745	SNV	C	T	0.0294118	3	6	50	0	11	0		-
15148	SNV	A	G	0.0373303	6	6	100	5	11	45.4545	AAR31572.1:p.Ser62Gly	Yes	UL6	HHV5wtgp012	type 1 membrane protein; RL11 family	membrane protein UL6	AAR31572.1	GI:39842028	MNGWAGVCLITHCLNTRSRTYVALNMLAFARTPRGVPSCLFNKV WVSRYALVLILMVCASESSTSWAVTSNGLPNCSTVTRTAGQDAELHGPAPLSCNVTQW GRYENGSTPVLWCTLRGSRMRVSLGHRVAFGCSWKTFFIYNVSESSGGTYYQKGYNCT DKHITLSCFNLTVVPRAVQSTTTVMTPTLVTNSTFSVSLVALRLTTNSSAFGHAIYQR QQRVENGTLSKNITNLAFTYGSWGVAMLLFAAVMVLVDLGLPQSAWRRWRSHVDDEER GLLM
15165	SNV	C	T	0.0175339	5	6	83.3333	2	11	18.1818		No	UL6	HHV5wtgp012	type 1 membrane protein; RL11 family	membrane protein UL6	AAR31572.1	GI:39842028	MNGWAGVCLITHCLNTRSRTYVALNMLAFARTPRGVPSCLFNKV WVSRYALVLILMVCASESSTSWAVTSNGLPNCSTVTRTAGQDAELHGPAPLSCNVTQW GRYENGSTPVLWCTLRGSRMRVSLGHRVAFGCSWKTFFIYNVSESSGGTYYQKGYNCT DKHITLSCFNLTVVPRAVQSTTTVMTPTLVTNSTFSVSLVALRLTTNSSAFGHAIYQR QQRVENGTLSKNITNLAFTYGSWGVAMLLFAAVMVLVDLGLPQSAWRRWRSHVDDEER GLLM
15171	SNV	A	T	0.0169683	6	6	100	4	11	36.3636		No	UL6	HHV5wtgp012	type 1 membrane protein; RL11 family	membrane protein UL6	AAR31572.1	GI:39842028	MNGWAGVCLITHCLNTRSRTYVALNMLAFARTPRGVPSCLFNKV WVSRYALVLILMVCASESSTSWAVTSNGLPNCSTVTRTAGQDAELHGPAPLSCNVTQW GRYENGSTPVLWCTLRGSRMRVSLGHRVAFGCSWKTFFIYNVSESSGGTYYQKGYNCT DKHITLSCFNLTVVPRAVQSTTTVMTPTLVTNSTFSVSLVALRLTTNSSAFGHAIYQR QQRVENGTLSKNITNLAFTYGSWGVAMLLFAAVMVLVDLGLPQSAWRRWRSHVDDEER GLLM
15180	SNV	A	G	0.0373303	6	6	100	5	11	45.4545		No	UL6	HHV5wtgp012	type 1 membrane protein; RL11 family	membrane protein UL6	AAR31572.1	GI:39842028	MNGWAGVCLITHCLNTRSRTYVALNMLAFARTPRGVPSCLFNKV WVSRYALVLILMVCASESSTSWAVTSNGLPNCSTVTRTAGQDAELHGPAPLSCNVTQW GRYENGSTPVLWCTLRGSRMRVSLGHRVAFGCSWKTFFIYNVSESSGGTYYQKGYNCT DKHITLSCFNLTVVPRAVQSTTTVMTPTLVTNSTFSVSLVALRLTTNSSAFGHAIYQR QQRVENGTLSKNITNLAFTYGSWGVAMLLFAAVMVLVDLGLPQSAWRRWRSHVDDEER GLLM
15312..15313	MNV	TT	CC	0.0373303	6	6	100	5	11	45.4545		No	UL6	HHV5wtgp012	type 1 membrane protein; RL11 family	membrane protein UL6	AAR31572.1	GI:39842028	MNGWAGVCLITHCLNTRSRTYVALNMLAFARTPRGVPSCLFNKV WVSRYALVLILMVCASESSTSWAVTSNGLPNCSTVTRTAGQDAELHGPAPLSCNVTQW GRYENGSTPVLWCTLRGSRMRVSLGHRVAFGCSWKTFFIYNVSESSGGTYYQKGYNCT DKHITLSCFNLTVVPRAVQSTTTVMTPTLVTNSTFSVSLVALRLTTNSSAFGHAIYQR QQRVENGTLSKNITNLAFTYGSWGVAMLLFAAVMVLVDLGLPQSAWRRWRSHVDDEER GLLM
15374	SNV	A	C	0.0373303	6	6	100	5	11	45.4545	AAR31572.1:p.Lys137Thr	Yes	UL6	HHV5wtgp012	type 1 membrane protein; RL11 family	membrane protein UL6	AAR31572.1	GI:39842028	MNGWAGVCLITHCLNTRSRTYVALNMLAFARTPRGVPSCLFNKV WVSRYALVLILMVCASESSTSWAVTSNGLPNCSTVTRTAGQDAELHGPAPLSCNVTQW GRYENGSTPVLWCTLRGSRMRVSLGHRVAFGCSWKTFFIYNVSESSGGTYYQKGYNCT DKHITLSCFNLTVVPRAVQSTTTVMTPTLVTNSTFSVSLVALRLTTNSSAFGHAIYQR QQRVENGTLSKNITNLAFTYGSWGVAMLLFAAVMVLVDLGLPQSAWRRWRSHVDDEER GLLM
15378	SNV	A	G	0.0373303	6	6	100	5	11	45.4545		No	UL6	HHV5wtgp012	type 1 membrane protein; RL11 family	membrane protein UL6	AAR31572.1	GI:39842028	MNGWAGVCLITHCLNTRSRTYVALNMLAFARTPRGVPSCLFNKV WVSRYALVLILMVCASESSTSWAVTSNGLPNCSTVTRTAGQDAELHGPAPLSCNVTQW GRYENGSTPVLWCTLRGSRMRVSLGHRVAFGCSWKTFFIYNVSESSGGTYYQKGYNCT DKHITLSCFNLTVVPRAVQSTTTVMTPTLVTNSTFSVSLVALRLTTNSSAFGHAIYQR QQRVENGTLSKNITNLAFTYGSWGVAMLLFAAVMVLVDLGLPQSAWRRWRSHVDDEER GLLM
15425	SNV	A	G	0.0373303	6	6	100	5	11	45.4545	AAR31572.1:p.Gln154Arg	Yes	UL6	HHV5wtgp012	type 1 membrane protein; RL11 family	membrane protein UL6	AAR31572.1	GI:39842028	MNGWAGVCLITHCLNTRSRTYVALNMLAFARTPRGVPSCLFNKV WVSRYALVLILMVCASESSTSWAVTSNGLPNCSTVTRTAGQDAELHGPAPLSCNVTQW GRYENGSTPVLWCTLRGSRMRVSLGHRVAFGCSWKTFFIYNVSESSGGTYYQKGYNCT DKHITLSCFNLTVVPRAVQSTTTVMTPTLVTNSTFSVSLVALRLTTNSSAFGHAIYQR QQRVENGTLSKNITNLAFTYGSWGVAMLLFAAVMVLVDLGLPQSAWRRWRSHVDDEER GLLM
15433	SNV	T	G	0.0373303	6	6	100	5	11	45.4545	AAR31572.1:p.Tyr157Asp	Yes	UL6	HHV5wtgp012	type 1 membrane protein; RL11 family	membrane protein UL6	AAR31572.1	GI:39842028	MNGWAGVCLITHCLNTRSRTYVALNMLAFARTPRGVPSCLFNKV WVSRYALVLILMVCASESSTSWAVTSNGLPNCSTVTRTAGQDAELHGPAPLSCNVTQW GRYENGSTPVLWCTLRGSRMRVSLGHRVAFGCSWKTFFIYNVSESSGGTYYQKGYNCT DKHITLSCFNLTVVPRAVQSTTTVMTPTLVTNSTFSVSLVALRLTTNSSAFGHAIYQR QQRVENGTLSKNITNLAFTYGSWGVAMLLFAAVMVLVDLGLPQSAWRRWRSHVDDEER GLLM
15441	SNV	C	T	0.0373303	6	6	100	5	11	45.4545		No	UL6	HHV5wtgp012	type 1 membrane protein; RL11 family	membrane protein UL6	AAR31572.1	GI:39842028	MNGWAGVCLITHCLNTRSRTYVALNMLAFARTPRGVPSCLFNKV WVSRYALVLILMVCASESSTSWAVTSNGLPNCSTVTRTAGQDAELHGPAPLSCNVTQW GRYENGSTPVLWCTLRGSRMRVSLGHRVAFGCSWKTFFIYNVSESSGGTYYQKGYNCT DKHITLSCFNLTVVPRAVQSTTTVMTPTLVTNSTFSVSLVALRLTTNSSAFGHAIYQR QQRVENGTLSKNITNLAFTYGSWGVAMLLFAAVMVLVDLGLPQSAWRRWRSHVDDEER GLLM
15517	SNV	A	G	0.0373303	6	6	100	5	11	45.4545	AAR31572.1:p.Met185Val	Yes	UL6	HHV5wtgp012	type 1 membrane protein; RL11 family	membrane protein UL6	AAR31572.1	GI:39842028	MNGWAGVCLITHCLNTRSRTYVALNMLAFARTPRGVPSCLFNKV WVSRYALVLILMVCASESSTSWAVTSNGLPNCSTVTRTAGQDAELHGPAPLSCNVTQW GRYENGSTPVLWCTLRGSRMRVSLGHRVAFGCSWKTFFIYNVSESSGGTYYQKGYNCT DKHITLSCFNLTVVPRAVQSTTTVMTPTLVTNSTFSVSLVALRLTTNSSAFGHAIYQR QQRVENGTLSKNITNLAFTYGSWGVAMLLFAAVMVLVDLGLPQSAWRRWRSHVDDEER GLLM
15560..15561	MNV	TT	CC	0.0373303	6	6	100	5	11	45.4545	AAR31572.1:p.Leu199Pro	Yes	UL6	HHV5wtgp012	type 1 membrane protein; RL11 family	membrane protein UL6	AAR31572.1	GI:39842028	MNGWAGVCLITHCLNTRSRTYVALNMLAFARTPRGVPSCLFNKV WVSRYALVLILMVCASESSTSWAVTSNGLPNCSTVTRTAGQDAELHGPAPLSCNVTQW GRYENGSTPVLWCTLRGSRMRVSLGHRVAFGCSWKTFFIYNVSESSGGTYYQKGYNCT DKHITLSCFNLTVVPRAVQSTTTVMTPTLVTNSTFSVSLVALRLTTNSSAFGHAIYQR QQRVENGTLSKNITNLAFTYGSWGVAMLLFAAVMVLVDLGLPQSAWRRWRSHVDDEER GLLM
15565	SNV	G	A	0.0373303	6	6	100	5	11	45.4545	AAR31572.1:p.Ala201Thr	Yes	UL6	HHV5wtgp012	type 1 membrane protein; RL11 family	membrane protein UL6	AAR31572.1	GI:39842028	MNGWAGVCLITHCLNTRSRTYVALNMLAFARTPRGVPSCLFNKV WVSRYALVLILMVCASESSTSWAVTSNGLPNCSTVTRTAGQDAELHGPAPLSCNVTQW GRYENGSTPVLWCTLRGSRMRVSLGHRVAFGCSWKTFFIYNVSESSGGTYYQKGYNCT DKHITLSCFNLTVVPRAVQSTTTVMTPTLVTNSTFSVSLVALRLTTNSSAFGHAIYQR QQRVENGTLSKNITNLAFTYGSWGVAMLLFAAVMVLVDLGLPQSAWRRWRSHVDDEER GLLM
15573	SNV	A	T	0.0373303	6	6	100	5	11	45.4545	AAR31572.1:p.Arg203Ser	Yes	UL6	HHV5wtgp012	type 1 membrane protein; RL11 family	membrane protein UL6	AAR31572.1	GI:39842028	MNGWAGVCLITHCLNTRSRTYVALNMLAFARTPRGVPSCLFNKV WVSRYALVLILMVCASESSTSWAVTSNGLPNCSTVTRTAGQDAELHGPAPLSCNVTQW GRYENGSTPVLWCTLRGSRMRVSLGHRVAFGCSWKTFFIYNVSESSGGTYYQKGYNCT DKHITLSCFNLTVVPRAVQSTTTVMTPTLVTNSTFSVSLVALRLTTNSSAFGHAIYQR QQRVENGTLSKNITNLAFTYGSWGVAMLLFAAVMVLVDLGLPQSAWRRWRSHVDDEER GLLM
15605	SNV	C	T	0.0373303	6	6	100	5	11	45.4545	AAR31572.1:p.Ala214Val	Yes	UL6	HHV5wtgp012	type 1 membrane protein; RL11 family	membrane protein UL6	AAR31572.1	GI:39842028	MNGWAGVCLITHCLNTRSRTYVALNMLAFARTPRGVPSCLFNKV WVSRYALVLILMVCASESSTSWAVTSNGLPNCSTVTRTAGQDAELHGPAPLSCNVTQW GRYENGSTPVLWCTLRGSRMRVSLGHRVAFGCSWKTFFIYNVSESSGGTYYQKGYNCT DKHITLSCFNLTVVPRAVQSTTTVMTPTLVTNSTFSVSLVALRLTTNSSAFGHAIYQR QQRVENGTLSKNITNLAFTYGSWGVAMLLFAAVMVLVDLGLPQSAWRRWRSHVDDEER GLLM
16632	SNV	A	G	0.0373303	6	6	100	5	11	45.4545		No	UL8	HHV5wtgp014	type 1 membrane protein; RL11 family	membrane glycoprotein UL8	AAR31574.2	GI:338970384	MASDVGSHPLTVTRFRCRVHYVYNKLLILTLFAPVILESVIYVS GPQGGNVTLVSNFTSNISARWFRWDGNDSHLICFYKRGEGLSTPYVGLSLSCAANQIT IFNLTLNDSGRYGAEGFTRSGENETFLWYNLTVKPKPLETTPASNVTTIVTTTSTVTD AKSNVTGNVSLAPQLRAVAGFSHQTPLENNTHLALGEGFVPTMTSSRLSASENYDGNY EFTETANTTRTNTSDWITLGSSASLLKSTETAVNLSNATTVIPQPVEYPAGGVQYQRA ATHYSWMLIIVIILIIFIIICLRAPRKIYHHWKDSKQYGQVFMTDTEL
25653..25654	MNV	GG	AT	0.0429864	5	6	83.3333	3	11	27.2727	AAR31585.1:p.Arg5His	Yes	UL20	HHV5wtgp025	type 1 membrane protein	membrane protein UL20	AAR31585.1	GI:39842041	MLGIRAMLVMLDYYWIQLITNNGTRSNNTDTIFVSLLTGPNGVT RTAIGGLYSNYTNLTGAFGFTSTNMSATNSSAEDNWSVTNLTESCINRGESYVTTIWL LDCTKNDTYWYYGNAYNHTCEGTISGYLLGMCKLWKSWVNNITSYNTVRVESLGNETR CMLLPRQYTLNATVEWYNKSEGDVPEEFMDYVILTPLAVLTCGLQEAYILDKGRRYMY LFSVSCVGITGTVSIILVSLSLLILICYYRCGRLLICPRGFELLPEFTEEEEEKEKLL THNDIEVQVPIRTRRLLVPWIRESKMWVLPPPLPPRPPHLIEFPPSPPPSPGPMHMVV CMPA
25673	SNV	G	A	0.0429864	5	6	83.3333	3	11	27.2727	AAR31585.1:p.Asp12Asn	Yes	UL20	HHV5wtgp025	type 1 membrane protein	membrane protein UL20	AAR31585.1	GI:39842041	MLGIRAMLVMLDYYWIQLITNNGTRSNNTDTIFVSLLTGPNGVT RTAIGGLYSNYTNLTGAFGFTSTNMSATNSSAEDNWSVTNLTESCINRGESYVTTIWL LDCTKNDTYWYYGNAYNHTCEGTISGYLLGMCKLWKSWVNNITSYNTVRVESLGNETR CMLLPRQYTLNATVEWYNKSEGDVPEEFMDYVILTPLAVLTCGLQEAYILDKGRRYMY LFSVSCVGITGTVSIILVSLSLLILICYYRCGRLLICPRGFELLPEFTEEEEEKEKLL THNDIEVQVPIRTRRLLVPWIRESKMWVLPPPLPPRPPHLIEFPPSPPPSPGPMHMVV CMPA
25679	SNV	T	C	0.0429864	5	6	83.3333	3	11	27.2727	AAR31585.1:p.Tyr14His	Yes	UL20	HHV5wtgp025	type 1 membrane protein	membrane protein UL20	AAR31585.1	GI:39842041	MLGIRAMLVMLDYYWIQLITNNGTRSNNTDTIFVSLLTGPNGVT RTAIGGLYSNYTNLTGAFGFTSTNMSATNSSAEDNWSVTNLTESCINRGESYVTTIWL LDCTKNDTYWYYGNAYNHTCEGTISGYLLGMCKLWKSWVNNITSYNTVRVESLGNETR CMLLPRQYTLNATVEWYNKSEGDVPEEFMDYVILTPLAVLTCGLQEAYILDKGRRYMY LFSVSCVGITGTVSIILVSLSLLILICYYRCGRLLICPRGFELLPEFTEEEEEKEKLL THNDIEVQVPIRTRRLLVPWIRESKMWVLPPPLPPRPPHLIEFPPSPPPSPGPMHMVV CMPA
25707	SNV	G	A	0.0373303	6	6	100	5	11	45.4545	AAR31585.1:p.Gly23Asp	Yes	UL20	HHV5wtgp025	type 1 membrane protein	membrane protein UL20	AAR31585.1	GI:39842041	MLGIRAMLVMLDYYWIQLITNNGTRSNNTDTIFVSLLTGPNGVT RTAIGGLYSNYTNLTGAFGFTSTNMSATNSSAEDNWSVTNLTESCINRGESYVTTIWL LDCTKNDTYWYYGNAYNHTCEGTISGYLLGMCKLWKSWVNNITSYNTVRVESLGNETR CMLLPRQYTLNATVEWYNKSEGDVPEEFMDYVILTPLAVLTCGLQEAYILDKGRRYMY LFSVSCVGITGTVSIILVSLSLLILICYYRCGRLLICPRGFELLPEFTEEEEEKEKLL THNDIEVQVPIRTRRLLVPWIRESKMWVLPPPLPPRPPHLIEFPPSPPPSPGPMHMVV CMPA
25709	SNV	A	G	0.0429864	5	6	83.3333	3	11	27.2727	AAR31585.1:p.Thr24Ala	Yes	UL20	HHV5wtgp025	type 1 membrane protein	membrane protein UL20	AAR31585.1	GI:39842041	MLGIRAMLVMLDYYWIQLITNNGTRSNNTDTIFVSLLTGPNGVT RTAIGGLYSNYTNLTGAFGFTSTNMSATNSSAEDNWSVTNLTESCINRGESYVTTIWL LDCTKNDTYWYYGNAYNHTCEGTISGYLLGMCKLWKSWVNNITSYNTVRVESLGNETR CMLLPRQYTLNATVEWYNKSEGDVPEEFMDYVILTPLAVLTCGLQEAYILDKGRRYMY LFSVSCVGITGTVSIILVSLSLLILICYYRCGRLLICPRGFELLPEFTEEEEEKEKLL THNDIEVQVPIRTRRLLVPWIRESKMWVLPPPLPPRPPHLIEFPPSPPPSPGPMHMVV CMPA
25716..25717	MNV	GC	AT	0.0429864	5	6	83.3333	3	11	27.2727	AAR31585.1:p.Ser26Asn	Yes	UL20	HHV5wtgp025	type 1 membrane protein	membrane protein UL20	AAR31585.1	GI:39842041	MLGIRAMLVMLDYYWIQLITNNGTRSNNTDTIFVSLLTGPNGVT RTAIGGLYSNYTNLTGAFGFTSTNMSATNSSAEDNWSVTNLTESCINRGESYVTTIWL LDCTKNDTYWYYGNAYNHTCEGTISGYLLGMCKLWKSWVNNITSYNTVRVESLGNETR CMLLPRQYTLNATVEWYNKSEGDVPEEFMDYVILTPLAVLTCGLQEAYILDKGRRYMY LFSVSCVGITGTVSIILVSLSLLILICYYRCGRLLICPRGFELLPEFTEEEEEKEKLL THNDIEVQVPIRTRRLLVPWIRESKMWVLPPPLPPRPPHLIEFPPSPPPSPGPMHMVV CMPA
25720	SNV	C	T	0.0429864	5	6	83.3333	3	11	27.2727		No	UL20	HHV5wtgp025	type 1 membrane protein	membrane protein UL20	AAR31585.1	GI:39842041	MLGIRAMLVMLDYYWIQLITNNGTRSNNTDTIFVSLLTGPNGVT RTAIGGLYSNYTNLTGAFGFTSTNMSATNSSAEDNWSVTNLTESCINRGESYVTTIWL LDCTKNDTYWYYGNAYNHTCEGTISGYLLGMCKLWKSWVNNITSYNTVRVESLGNETR CMLLPRQYTLNATVEWYNKSEGDVPEEFMDYVILTPLAVLTCGLQEAYILDKGRRYMY LFSVSCVGITGTVSIILVSLSLLILICYYRCGRLLICPRGFELLPEFTEEEEEKEKLL THNDIEVQVPIRTRRLLVPWIRESKMWVLPPPLPPRPPHLIEFPPSPPPSPGPMHMVV CMPA
25726	SNV	C	A	0.0429864	5	6	83.3333	3	11	27.2727		No	UL20	HHV5wtgp025	type 1 membrane protein	membrane protein UL20	AAR31585.1	GI:39842041	MLGIRAMLVMLDYYWIQLITNNGTRSNNTDTIFVSLLTGPNGVT RTAIGGLYSNYTNLTGAFGFTSTNMSATNSSAEDNWSVTNLTESCINRGESYVTTIWL LDCTKNDTYWYYGNAYNHTCEGTISGYLLGMCKLWKSWVNNITSYNTVRVESLGNETR CMLLPRQYTLNATVEWYNKSEGDVPEEFMDYVILTPLAVLTCGLQEAYILDKGRRYMY LFSVSCVGITGTVSIILVSLSLLILICYYRCGRLLICPRGFELLPEFTEEEEEKEKLL THNDIEVQVPIRTRRLLVPWIRESKMWVLPPPLPPRPPHLIEFPPSPPPSPGPMHMVV CMPA
25781	SNV	A	G	0.0429864	5	6	83.3333	3	11	27.2727	AAR31585.1:p.Ile48Val	Yes	UL20	HHV5wtgp025	type 1 membrane protein	membrane protein UL20	AAR31585.1	GI:39842041	MLGIRAMLVMLDYYWIQLITNNGTRSNNTDTIFVSLLTGPNGVT RTAIGGLYSNYTNLTGAFGFTSTNMSATNSSAEDNWSVTNLTESCINRGESYVTTIWL LDCTKNDTYWYYGNAYNHTCEGTISGYLLGMCKLWKSWVNNITSYNTVRVESLGNETR CMLLPRQYTLNATVEWYNKSEGDVPEEFMDYVILTPLAVLTCGLQEAYILDKGRRYMY LFSVSCVGITGTVSIILVSLSLLILICYYRCGRLLICPRGFELLPEFTEEEEEKEKLL THNDIEVQVPIRTRRLLVPWIRESKMWVLPPPLPPRPPHLIEFPPSPPPSPGPMHMVV CMPA
26069..26070	MNV	AT	GA	0.0429864	5	6	83.3333	3	11	27.2727	AAR31585.1:p.Ile144Asp	Yes	UL20	HHV5wtgp025	type 1 membrane protein	membrane protein UL20	AAR31585.1	GI:39842041	MLGIRAMLVMLDYYWIQLITNNGTRSNNTDTIFVSLLTGPNGVT RTAIGGLYSNYTNLTGAFGFTSTNMSATNSSAEDNWSVTNLTESCINRGESYVTTIWL LDCTKNDTYWYYGNAYNHTCEGTISGYLLGMCKLWKSWVNNITSYNTVRVESLGNETR CMLLPRQYTLNATVEWYNKSEGDVPEEFMDYVILTPLAVLTCGLQEAYILDKGRRYMY LFSVSCVGITGTVSIILVSLSLLILICYYRCGRLLICPRGFELLPEFTEEEEEKEKLL THNDIEVQVPIRTRRLLVPWIRESKMWVLPPPLPPRPPHLIEFPPSPPPSPGPMHMVV CMPA
26070	SNV	T	A	0.0169683	6	6	100	4	11	36.3636	AAR31585.1:p.Ile144Asn	Yes	UL20	HHV5wtgp025	type 1 membrane protein	membrane protein UL20	AAR31585.1	GI:39842041	MLGIRAMLVMLDYYWIQLITNNGTRSNNTDTIFVSLLTGPNGVT RTAIGGLYSNYTNLTGAFGFTSTNMSATNSSAEDNWSVTNLTESCINRGESYVTTIWL LDCTKNDTYWYYGNAYNHTCEGTISGYLLGMCKLWKSWVNNITSYNTVRVESLGNETR CMLLPRQYTLNATVEWYNKSEGDVPEEFMDYVILTPLAVLTCGLQEAYILDKGRRYMY LFSVSCVGITGTVSIILVSLSLLILICYYRCGRLLICPRGFELLPEFTEEEEEKEKLL THNDIEVQVPIRTRRLLVPWIRESKMWVLPPPLPPRPPHLIEFPPSPPPSPGPMHMVV CMPA
26078	SNV	T	C	0.0169683	6	6	100	4	11	36.3636	AAR31585.1:p.Tyr147His	Yes	UL20	HHV5wtgp025	type 1 membrane protein	membrane protein UL20	AAR31585.1	GI:39842041	MLGIRAMLVMLDYYWIQLITNNGTRSNNTDTIFVSLLTGPNGVT RTAIGGLYSNYTNLTGAFGFTSTNMSATNSSAEDNWSVTNLTESCINRGESYVTTIWL LDCTKNDTYWYYGNAYNHTCEGTISGYLLGMCKLWKSWVNNITSYNTVRVESLGNETR CMLLPRQYTLNATVEWYNKSEGDVPEEFMDYVILTPLAVLTCGLQEAYILDKGRRYMY LFSVSCVGITGTVSIILVSLSLLILICYYRCGRLLICPRGFELLPEFTEEEEEKEKLL THNDIEVQVPIRTRRLLVPWIRESKMWVLPPPLPPRPPHLIEFPPSPPPSPGPMHMVV CMPA
26087..26088	MNV	GT	AC	0.0429864	5	6	83.3333	3	11	27.2727	AAR31585.1:p.Val150Thr	Yes	UL20	HHV5wtgp025	type 1 membrane protein	membrane protein UL20	AAR31585.1	GI:39842041	MLGIRAMLVMLDYYWIQLITNNGTRSNNTDTIFVSLLTGPNGVT RTAIGGLYSNYTNLTGAFGFTSTNMSATNSSAEDNWSVTNLTESCINRGESYVTTIWL LDCTKNDTYWYYGNAYNHTCEGTISGYLLGMCKLWKSWVNNITSYNTVRVESLGNETR CMLLPRQYTLNATVEWYNKSEGDVPEEFMDYVILTPLAVLTCGLQEAYILDKGRRYMY LFSVSCVGITGTVSIILVSLSLLILICYYRCGRLLICPRGFELLPEFTEEEEEKEKLL THNDIEVQVPIRTRRLLVPWIRESKMWVLPPPLPPRPPHLIEFPPSPPPSPGPMHMVV CMPA
26093	SNV	G	A	0.0169683	6	6	100	4	11	36.3636	AAR31585.1:p.Val152Ile	Yes	UL20	HHV5wtgp025	type 1 membrane protein	membrane protein UL20	AAR31585.1	GI:39842041	MLGIRAMLVMLDYYWIQLITNNGTRSNNTDTIFVSLLTGPNGVT RTAIGGLYSNYTNLTGAFGFTSTNMSATNSSAEDNWSVTNLTESCINRGESYVTTIWL LDCTKNDTYWYYGNAYNHTCEGTISGYLLGMCKLWKSWVNNITSYNTVRVESLGNETR CMLLPRQYTLNATVEWYNKSEGDVPEEFMDYVILTPLAVLTCGLQEAYILDKGRRYMY LFSVSCVGITGTVSIILVSLSLLILICYYRCGRLLICPRGFELLPEFTEEEEEKEKLL THNDIEVQVPIRTRRLLVPWIRESKMWVLPPPLPPRPPHLIEFPPSPPPSPGPMHMVV CMPA
26105..26106	MNV	GG	AA	0.0429864	5	6	83.3333	3	11	27.2727	AAR31585.1:p.Gly156Lys	Yes	UL20	HHV5wtgp025	type 1 membrane protein	membrane protein UL20	AAR31585.1	GI:39842041	MLGIRAMLVMLDYYWIQLITNNGTRSNNTDTIFVSLLTGPNGVT RTAIGGLYSNYTNLTGAFGFTSTNMSATNSSAEDNWSVTNLTESCINRGESYVTTIWL LDCTKNDTYWYYGNAYNHTCEGTISGYLLGMCKLWKSWVNNITSYNTVRVESLGNETR CMLLPRQYTLNATVEWYNKSEGDVPEEFMDYVILTPLAVLTCGLQEAYILDKGRRYMY LFSVSCVGITGTVSIILVSLSLLILICYYRCGRLLICPRGFELLPEFTEEEEEKEKLL THNDIEVQVPIRTRRLLVPWIRESKMWVLPPPLPPRPPHLIEFPPSPPPSPGPMHMVV CMPA
26124	SNV	T	C	0.0429864	5	6	83.3333	3	11	27.2727	AAR31585.1:p.Met162Thr	Yes	UL20	HHV5wtgp025	type 1 membrane protein	membrane protein UL20	AAR31585.1	GI:39842041	MLGIRAMLVMLDYYWIQLITNNGTRSNNTDTIFVSLLTGPNGVT RTAIGGLYSNYTNLTGAFGFTSTNMSATNSSAEDNWSVTNLTESCINRGESYVTTIWL LDCTKNDTYWYYGNAYNHTCEGTISGYLLGMCKLWKSWVNNITSYNTVRVESLGNETR CMLLPRQYTLNATVEWYNKSEGDVPEEFMDYVILTPLAVLTCGLQEAYILDKGRRYMY LFSVSCVGITGTVSIILVSLSLLILICYYRCGRLLICPRGFELLPEFTEEEEEKEKLL THNDIEVQVPIRTRRLLVPWIRESKMWVLPPPLPPRPPHLIEFPPSPPPSPGPMHMVV CMPA
26130	SNV	T	C	0.0429864	5	6	83.3333	3	11	27.2727	AAR31585.1:p.Leu164Pro	Yes	UL20	HHV5wtgp025	type 1 membrane protein	membrane protein UL20	AAR31585.1	GI:39842041	MLGIRAMLVMLDYYWIQLITNNGTRSNNTDTIFVSLLTGPNGVT RTAIGGLYSNYTNLTGAFGFTSTNMSATNSSAEDNWSVTNLTESCINRGESYVTTIWL LDCTKNDTYWYYGNAYNHTCEGTISGYLLGMCKLWKSWVNNITSYNTVRVESLGNETR CMLLPRQYTLNATVEWYNKSEGDVPEEFMDYVILTPLAVLTCGLQEAYILDKGRRYMY LFSVSCVGITGTVSIILVSLSLLILICYYRCGRLLICPRGFELLPEFTEEEEEKEKLL THNDIEVQVPIRTRRLLVPWIRESKMWVLPPPLPPRPPHLIEFPPSPPPSPGPMHMVV CMPA
26132	SNV	C	G	0.0429864	5	6	83.3333	3	11	27.2727	AAR31585.1:p.Pro165Ala	Yes	UL20	HHV5wtgp025	type 1 membrane protein	membrane protein UL20	AAR31585.1	GI:39842041	MLGIRAMLVMLDYYWIQLITNNGTRSNNTDTIFVSLLTGPNGVT RTAIGGLYSNYTNLTGAFGFTSTNMSATNSSAEDNWSVTNLTESCINRGESYVTTIWL LDCTKNDTYWYYGNAYNHTCEGTISGYLLGMCKLWKSWVNNITSYNTVRVESLGNETR CMLLPRQYTLNATVEWYNKSEGDVPEEFMDYVILTPLAVLTCGLQEAYILDKGRRYMY LFSVSCVGITGTVSIILVSLSLLILICYYRCGRLLICPRGFELLPEFTEEEEEKEKLL THNDIEVQVPIRTRRLLVPWIRESKMWVLPPPLPPRPPHLIEFPPSPPPSPGPMHMVV CMPA
26146	SNV	T	C	0.0169683	6	6	100	4	11	36.3636		No	UL20	HHV5wtgp025	type 1 membrane protein	membrane protein UL20	AAR31585.1	GI:39842041	MLGIRAMLVMLDYYWIQLITNNGTRSNNTDTIFVSLLTGPNGVT RTAIGGLYSNYTNLTGAFGFTSTNMSATNSSAEDNWSVTNLTESCINRGESYVTTIWL LDCTKNDTYWYYGNAYNHTCEGTISGYLLGMCKLWKSWVNNITSYNTVRVESLGNETR CMLLPRQYTLNATVEWYNKSEGDVPEEFMDYVILTPLAVLTCGLQEAYILDKGRRYMY LFSVSCVGITGTVSIILVSLSLLILICYYRCGRLLICPRGFELLPEFTEEEEEKEKLL THNDIEVQVPIRTRRLLVPWIRESKMWVLPPPLPPRPPHLIEFPPSPPPSPGPMHMVV CMPA
26189	SNV	G	A	0.0175339	5	6	83.3333	2	11	18.1818	AAR31585.1:p.Val184Ile	Yes	UL20	HHV5wtgp025	type 1 membrane protein	membrane protein UL20	AAR31585.1	GI:39842041	MLGIRAMLVMLDYYWIQLITNNGTRSNNTDTIFVSLLTGPNGVT RTAIGGLYSNYTNLTGAFGFTSTNMSATNSSAEDNWSVTNLTESCINRGESYVTTIWL LDCTKNDTYWYYGNAYNHTCEGTISGYLLGMCKLWKSWVNNITSYNTVRVESLGNETR CMLLPRQYTLNATVEWYNKSEGDVPEEFMDYVILTPLAVLTCGLQEAYILDKGRRYMY LFSVSCVGITGTVSIILVSLSLLILICYYRCGRLLICPRGFELLPEFTEEEEEKEKLL THNDIEVQVPIRTRRLLVPWIRESKMWVLPPPLPPRPPHLIEFPPSPPPSPGPMHMVV CMPA
26197	SNV	A	G	0.0429864	5	6	83.3333	3	11	27.2727		No	UL20	HHV5wtgp025	type 1 membrane protein	membrane protein UL20	AAR31585.1	GI:39842041	MLGIRAMLVMLDYYWIQLITNNGTRSNNTDTIFVSLLTGPNGVT RTAIGGLYSNYTNLTGAFGFTSTNMSATNSSAEDNWSVTNLTESCINRGESYVTTIWL LDCTKNDTYWYYGNAYNHTCEGTISGYLLGMCKLWKSWVNNITSYNTVRVESLGNETR CMLLPRQYTLNATVEWYNKSEGDVPEEFMDYVILTPLAVLTCGLQEAYILDKGRRYMY LFSVSCVGITGTVSIILVSLSLLILICYYRCGRLLICPRGFELLPEFTEEEEEKEKLL THNDIEVQVPIRTRRLLVPWIRESKMWVLPPPLPPRPPHLIEFPPSPPPSPGPMHMVV CMPA
26207	SNV	G	A	0.0429864	5	6	83.3333	3	11	27.2727	AAR31585.1:p.Asp190Asn	Yes	UL20	HHV5wtgp025	type 1 membrane protein	membrane protein UL20	AAR31585.1	GI:39842041	MLGIRAMLVMLDYYWIQLITNNGTRSNNTDTIFVSLLTGPNGVT RTAIGGLYSNYTNLTGAFGFTSTNMSATNSSAEDNWSVTNLTESCINRGESYVTTIWL LDCTKNDTYWYYGNAYNHTCEGTISGYLLGMCKLWKSWVNNITSYNTVRVESLGNETR CMLLPRQYTLNATVEWYNKSEGDVPEEFMDYVILTPLAVLTCGLQEAYILDKGRRYMY LFSVSCVGITGTVSIILVSLSLLILICYYRCGRLLICPRGFELLPEFTEEEEEKEKLL THNDIEVQVPIRTRRLLVPWIRESKMWVLPPPLPPRPPHLIEFPPSPPPSPGPMHMVV CMPA
26209	SNV	C	T	0.0429864	5	6	83.3333	3	11	27.2727		No	UL20	HHV5wtgp025	type 1 membrane protein	membrane protein UL20	AAR31585.1	GI:39842041	MLGIRAMLVMLDYYWIQLITNNGTRSNNTDTIFVSLLTGPNGVT RTAIGGLYSNYTNLTGAFGFTSTNMSATNSSAEDNWSVTNLTESCINRGESYVTTIWL LDCTKNDTYWYYGNAYNHTCEGTISGYLLGMCKLWKSWVNNITSYNTVRVESLGNETR CMLLPRQYTLNATVEWYNKSEGDVPEEFMDYVILTPLAVLTCGLQEAYILDKGRRYMY LFSVSCVGITGTVSIILVSLSLLILICYYRCGRLLICPRGFELLPEFTEEEEEKEKLL THNDIEVQVPIRTRRLLVPWIRESKMWVLPPPLPPRPPHLIEFPPSPPPSPGPMHMVV CMPA
26214	SNV	T	C	0.0429864	5	6	83.3333	3	11	27.2727	AAR31585.1:p.Val192Ala	Yes	UL20	HHV5wtgp025	type 1 membrane protein	membrane protein UL20	AAR31585.1	GI:39842041	MLGIRAMLVMLDYYWIQLITNNGTRSNNTDTIFVSLLTGPNGVT RTAIGGLYSNYTNLTGAFGFTSTNMSATNSSAEDNWSVTNLTESCINRGESYVTTIWL LDCTKNDTYWYYGNAYNHTCEGTISGYLLGMCKLWKSWVNNITSYNTVRVESLGNETR CMLLPRQYTLNATVEWYNKSEGDVPEEFMDYVILTPLAVLTCGLQEAYILDKGRRYMY LFSVSCVGITGTVSIILVSLSLLILICYYRCGRLLICPRGFELLPEFTEEEEEKEKLL THNDIEVQVPIRTRRLLVPWIRESKMWVLPPPLPPRPPHLIEFPPSPPPSPGPMHMVV CMPA
26228	SNV	T	G	0.0429864	5	6	83.3333	3	11	27.2727	AAR31585.1:p.Leu197Val	Yes	UL20	HHV5wtgp025	type 1 membrane protein	membrane protein UL20	AAR31585.1	GI:39842041	MLGIRAMLVMLDYYWIQLITNNGTRSNNTDTIFVSLLTGPNGVT RTAIGGLYSNYTNLTGAFGFTSTNMSATNSSAEDNWSVTNLTESCINRGESYVTTIWL LDCTKNDTYWYYGNAYNHTCEGTISGYLLGMCKLWKSWVNNITSYNTVRVESLGNETR CMLLPRQYTLNATVEWYNKSEGDVPEEFMDYVILTPLAVLTCGLQEAYILDKGRRYMY LFSVSCVGITGTVSIILVSLSLLILICYYRCGRLLICPRGFELLPEFTEEEEEKEKLL THNDIEVQVPIRTRRLLVPWIRESKMWVLPPPLPPRPPHLIEFPPSPPPSPGPMHMVV CMPA
26233	SNV	T	G	0.0429864	5	6	83.3333	3	11	27.2727		No	UL20	HHV5wtgp025	type 1 membrane protein	membrane protein UL20	AAR31585.1	GI:39842041	MLGIRAMLVMLDYYWIQLITNNGTRSNNTDTIFVSLLTGPNGVT RTAIGGLYSNYTNLTGAFGFTSTNMSATNSSAEDNWSVTNLTESCINRGESYVTTIWL LDCTKNDTYWYYGNAYNHTCEGTISGYLLGMCKLWKSWVNNITSYNTVRVESLGNETR CMLLPRQYTLNATVEWYNKSEGDVPEEFMDYVILTPLAVLTCGLQEAYILDKGRRYMY LFSVSCVGITGTVSIILVSLSLLILICYYRCGRLLICPRGFELLPEFTEEEEEKEKLL THNDIEVQVPIRTRRLLVPWIRESKMWVLPPPLPPRPPHLIEFPPSPPPSPGPMHMVV CMPA
26274..26276	MNV	AAG	TGA	0.0429864	5	6	83.3333	3	11	27.2727	AAR31585.1:p.Lys212_Gly213delinsMetSer	Yes	UL20	HHV5wtgp025	type 1 membrane protein	membrane protein UL20	AAR31585.1	GI:39842041	MLGIRAMLVMLDYYWIQLITNNGTRSNNTDTIFVSLLTGPNGVT RTAIGGLYSNYTNLTGAFGFTSTNMSATNSSAEDNWSVTNLTESCINRGESYVTTIWL LDCTKNDTYWYYGNAYNHTCEGTISGYLLGMCKLWKSWVNNITSYNTVRVESLGNETR CMLLPRQYTLNATVEWYNKSEGDVPEEFMDYVILTPLAVLTCGLQEAYILDKGRRYMY LFSVSCVGITGTVSIILVSLSLLILICYYRCGRLLICPRGFELLPEFTEEEEEKEKLL THNDIEVQVPIRTRRLLVPWIRESKMWVLPPPLPPRPPHLIEFPPSPPPSPGPMHMVV CMPA
26285	SNV	T	A	0.0429864	5	6	83.3333	3	11	27.2727	AAR31585.1:p.Tyr216Asn	Yes	UL20	HHV5wtgp025	type 1 membrane protein	membrane protein UL20	AAR31585.1	GI:39842041	MLGIRAMLVMLDYYWIQLITNNGTRSNNTDTIFVSLLTGPNGVT RTAIGGLYSNYTNLTGAFGFTSTNMSATNSSAEDNWSVTNLTESCINRGESYVTTIWL LDCTKNDTYWYYGNAYNHTCEGTISGYLLGMCKLWKSWVNNITSYNTVRVESLGNETR CMLLPRQYTLNATVEWYNKSEGDVPEEFMDYVILTPLAVLTCGLQEAYILDKGRRYMY LFSVSCVGITGTVSIILVSLSLLILICYYRCGRLLICPRGFELLPEFTEEEEEKEKLL THNDIEVQVPIRTRRLLVPWIRESKMWVLPPPLPPRPPHLIEFPPSPPPSPGPMHMVV CMPA
26285..26286	MNV	TA	AT	0.0276341	4	6	66.6667	1	11	9.09091	AAR31585.1:p.Tyr216Ile	Yes	UL20	HHV5wtgp025	type 1 membrane protein	membrane protein UL20	AAR31585.1	GI:39842041	MLGIRAMLVMLDYYWIQLITNNGTRSNNTDTIFVSLLTGPNGVT RTAIGGLYSNYTNLTGAFGFTSTNMSATNSSAEDNWSVTNLTESCINRGESYVTTIWL LDCTKNDTYWYYGNAYNHTCEGTISGYLLGMCKLWKSWVNNITSYNTVRVESLGNETR CMLLPRQYTLNATVEWYNKSEGDVPEEFMDYVILTPLAVLTCGLQEAYILDKGRRYMY LFSVSCVGITGTVSIILVSLSLLILICYYRCGRLLICPRGFELLPEFTEEEEEKEKLL THNDIEVQVPIRTRRLLVPWIRESKMWVLPPPLPPRPPHLIEFPPSPPPSPGPMHMVV CMPA
26289	SNV	T	C	0.0429864	5	6	83.3333	3	11	27.2727	AAR31585.1:p.Met217Thr	Yes	UL20	HHV5wtgp025	type 1 membrane protein	membrane protein UL20	AAR31585.1	GI:39842041	MLGIRAMLVMLDYYWIQLITNNGTRSNNTDTIFVSLLTGPNGVT RTAIGGLYSNYTNLTGAFGFTSTNMSATNSSAEDNWSVTNLTESCINRGESYVTTIWL LDCTKNDTYWYYGNAYNHTCEGTISGYLLGMCKLWKSWVNNITSYNTVRVESLGNETR CMLLPRQYTLNATVEWYNKSEGDVPEEFMDYVILTPLAVLTCGLQEAYILDKGRRYMY LFSVSCVGITGTVSIILVSLSLLILICYYRCGRLLICPRGFELLPEFTEEEEEKEKLL THNDIEVQVPIRTRRLLVPWIRESKMWVLPPPLPPRPPHLIEFPPSPPPSPGPMHMVV CMPA
26293	SNV	T	C	0.0429864	5	6	83.3333	3	11	27.2727		No	UL20	HHV5wtgp025	type 1 membrane protein	membrane protein UL20	AAR31585.1	GI:39842041	MLGIRAMLVMLDYYWIQLITNNGTRSNNTDTIFVSLLTGPNGVT RTAIGGLYSNYTNLTGAFGFTSTNMSATNSSAEDNWSVTNLTESCINRGESYVTTIWL LDCTKNDTYWYYGNAYNHTCEGTISGYLLGMCKLWKSWVNNITSYNTVRVESLGNETR CMLLPRQYTLNATVEWYNKSEGDVPEEFMDYVILTPLAVLTCGLQEAYILDKGRRYMY LFSVSCVGITGTVSIILVSLSLLILICYYRCGRLLICPRGFELLPEFTEEEEEKEKLL THNDIEVQVPIRTRRLLVPWIRESKMWVLPPPLPPRPPHLIEFPPSPPPSPGPMHMVV CMPA
26312	SNV	G	A	0.0429864	5	6	83.3333	3	11	27.2727	AAR31585.1:p.Val225Met	Yes	UL20	HHV5wtgp025	type 1 membrane protein	membrane protein UL20	AAR31585.1	GI:39842041	MLGIRAMLVMLDYYWIQLITNNGTRSNNTDTIFVSLLTGPNGVT RTAIGGLYSNYTNLTGAFGFTSTNMSATNSSAEDNWSVTNLTESCINRGESYVTTIWL LDCTKNDTYWYYGNAYNHTCEGTISGYLLGMCKLWKSWVNNITSYNTVRVESLGNETR CMLLPRQYTLNATVEWYNKSEGDVPEEFMDYVILTPLAVLTCGLQEAYILDKGRRYMY LFSVSCVGITGTVSIILVSLSLLILICYYRCGRLLICPRGFELLPEFTEEEEEKEKLL THNDIEVQVPIRTRRLLVPWIRESKMWVLPPPLPPRPPHLIEFPPSPPPSPGPMHMVV CMPA
26314	SNV	G	A	0.0429864	5	6	83.3333	3	11	27.2727		No	UL20	HHV5wtgp025	type 1 membrane protein	membrane protein UL20	AAR31585.1	GI:39842041	MLGIRAMLVMLDYYWIQLITNNGTRSNNTDTIFVSLLTGPNGVT RTAIGGLYSNYTNLTGAFGFTSTNMSATNSSAEDNWSVTNLTESCINRGESYVTTIWL LDCTKNDTYWYYGNAYNHTCEGTISGYLLGMCKLWKSWVNNITSYNTVRVESLGNETR CMLLPRQYTLNATVEWYNKSEGDVPEEFMDYVILTPLAVLTCGLQEAYILDKGRRYMY LFSVSCVGITGTVSIILVSLSLLILICYYRCGRLLICPRGFELLPEFTEEEEEKEKLL THNDIEVQVPIRTRRLLVPWIRESKMWVLPPPLPPRPPHLIEFPPSPPPSPGPMHMVV CMPA
26324	SNV	G	A	0.0429864	5	6	83.3333	3	11	27.2727	AAR31585.1:p.Gly229Ser	Yes	UL20	HHV5wtgp025	type 1 membrane protein	membrane protein UL20	AAR31585.1	GI:39842041	MLGIRAMLVMLDYYWIQLITNNGTRSNNTDTIFVSLLTGPNGVT RTAIGGLYSNYTNLTGAFGFTSTNMSATNSSAEDNWSVTNLTESCINRGESYVTTIWL LDCTKNDTYWYYGNAYNHTCEGTISGYLLGMCKLWKSWVNNITSYNTVRVESLGNETR CMLLPRQYTLNATVEWYNKSEGDVPEEFMDYVILTPLAVLTCGLQEAYILDKGRRYMY LFSVSCVGITGTVSIILVSLSLLILICYYRCGRLLICPRGFELLPEFTEEEEEKEKLL THNDIEVQVPIRTRRLLVPWIRESKMWVLPPPLPPRPPHLIEFPPSPPPSPGPMHMVV CMPA
26328..26330	MNV	CCG	TAA	0.0429864	5	6	83.3333	3	11	27.2727	AAR31585.1:p.Thr230_Val231delinsIleIle	Yes	UL20	HHV5wtgp025	type 1 membrane protein	membrane protein UL20	AAR31585.1	GI:39842041	MLGIRAMLVMLDYYWIQLITNNGTRSNNTDTIFVSLLTGPNGVT RTAIGGLYSNYTNLTGAFGFTSTNMSATNSSAEDNWSVTNLTESCINRGESYVTTIWL LDCTKNDTYWYYGNAYNHTCEGTISGYLLGMCKLWKSWVNNITSYNTVRVESLGNETR CMLLPRQYTLNATVEWYNKSEGDVPEEFMDYVILTPLAVLTCGLQEAYILDKGRRYMY LFSVSCVGITGTVSIILVSLSLLILICYYRCGRLLICPRGFELLPEFTEEEEEKEKLL THNDIEVQVPIRTRRLLVPWIRESKMWVLPPPLPPRPPHLIEFPPSPPPSPGPMHMVV CMPA
26335	SNV	T	C	0.0429864	5	6	83.3333	3	11	27.2727		No	UL20	HHV5wtgp025	type 1 membrane protein	membrane protein UL20	AAR31585.1	GI:39842041	MLGIRAMLVMLDYYWIQLITNNGTRSNNTDTIFVSLLTGPNGVT RTAIGGLYSNYTNLTGAFGFTSTNMSATNSSAEDNWSVTNLTESCINRGESYVTTIWL LDCTKNDTYWYYGNAYNHTCEGTISGYLLGMCKLWKSWVNNITSYNTVRVESLGNETR CMLLPRQYTLNATVEWYNKSEGDVPEEFMDYVILTPLAVLTCGLQEAYILDKGRRYMY LFSVSCVGITGTVSIILVSLSLLILICYYRCGRLLICPRGFELLPEFTEEEEEKEKLL THNDIEVQVPIRTRRLLVPWIRESKMWVLPPPLPPRPPHLIEFPPSPPPSPGPMHMVV CMPA
26338	SNV	T	C	0.0429864	5	6	83.3333	3	11	27.2727		No	UL20	HHV5wtgp025	type 1 membrane protein	membrane protein UL20	AAR31585.1	GI:39842041	MLGIRAMLVMLDYYWIQLITNNGTRSNNTDTIFVSLLTGPNGVT RTAIGGLYSNYTNLTGAFGFTSTNMSATNSSAEDNWSVTNLTESCINRGESYVTTIWL LDCTKNDTYWYYGNAYNHTCEGTISGYLLGMCKLWKSWVNNITSYNTVRVESLGNETR CMLLPRQYTLNATVEWYNKSEGDVPEEFMDYVILTPLAVLTCGLQEAYILDKGRRYMY LFSVSCVGITGTVSIILVSLSLLILICYYRCGRLLICPRGFELLPEFTEEEEEKEKLL THNDIEVQVPIRTRRLLVPWIRESKMWVLPPPLPPRPPHLIEFPPSPPPSPGPMHMVV CMPA
26346	SNV	T	C	0.0429864	5	6	83.3333	3	11	27.2727	AAR31585.1:p.Val236Ala	Yes	UL20	HHV5wtgp025	type 1 membrane protein	membrane protein UL20	AAR31585.1	GI:39842041	MLGIRAMLVMLDYYWIQLITNNGTRSNNTDTIFVSLLTGPNGVT RTAIGGLYSNYTNLTGAFGFTSTNMSATNSSAEDNWSVTNLTESCINRGESYVTTIWL LDCTKNDTYWYYGNAYNHTCEGTISGYLLGMCKLWKSWVNNITSYNTVRVESLGNETR CMLLPRQYTLNATVEWYNKSEGDVPEEFMDYVILTPLAVLTCGLQEAYILDKGRRYMY LFSVSCVGITGTVSIILVSLSLLILICYYRCGRLLICPRGFELLPEFTEEEEEKEKLL THNDIEVQVPIRTRRLLVPWIRESKMWVLPPPLPPRPPHLIEFPPSPPPSPGPMHMVV CMPA
26351	SNV	C	T	0.0429864	5	6	83.3333	3	11	27.2727		No	UL20	HHV5wtgp025	type 1 membrane protein	membrane protein UL20	AAR31585.1	GI:39842041	MLGIRAMLVMLDYYWIQLITNNGTRSNNTDTIFVSLLTGPNGVT RTAIGGLYSNYTNLTGAFGFTSTNMSATNSSAEDNWSVTNLTESCINRGESYVTTIWL LDCTKNDTYWYYGNAYNHTCEGTISGYLLGMCKLWKSWVNNITSYNTVRVESLGNETR CMLLPRQYTLNATVEWYNKSEGDVPEEFMDYVILTPLAVLTCGLQEAYILDKGRRYMY LFSVSCVGITGTVSIILVSLSLLILICYYRCGRLLICPRGFELLPEFTEEEEEKEKLL THNDIEVQVPIRTRRLLVPWIRESKMWVLPPPLPPRPPHLIEFPPSPPPSPGPMHMVV CMPA
26362	SNV	C	T	0.0429864	5	6	83.3333	3	11	27.2727		No	UL20	HHV5wtgp025	type 1 membrane protein	membrane protein UL20	AAR31585.1	GI:39842041	MLGIRAMLVMLDYYWIQLITNNGTRSNNTDTIFVSLLTGPNGVT RTAIGGLYSNYTNLTGAFGFTSTNMSATNSSAEDNWSVTNLTESCINRGESYVTTIWL LDCTKNDTYWYYGNAYNHTCEGTISGYLLGMCKLWKSWVNNITSYNTVRVESLGNETR CMLLPRQYTLNATVEWYNKSEGDVPEEFMDYVILTPLAVLTCGLQEAYILDKGRRYMY LFSVSCVGITGTVSIILVSLSLLILICYYRCGRLLICPRGFELLPEFTEEEEEKEKLL THNDIEVQVPIRTRRLLVPWIRESKMWVLPPPLPPRPPHLIEFPPSPPPSPGPMHMVV CMPA
26392	SNV	G	A	0.0429864	5	6	83.3333	3	11	27.2727		No	UL20	HHV5wtgp025	type 1 membrane protein	membrane protein UL20	AAR31585.1	GI:39842041	MLGIRAMLVMLDYYWIQLITNNGTRSNNTDTIFVSLLTGPNGVT RTAIGGLYSNYTNLTGAFGFTSTNMSATNSSAEDNWSVTNLTESCINRGESYVTTIWL LDCTKNDTYWYYGNAYNHTCEGTISGYLLGMCKLWKSWVNNITSYNTVRVESLGNETR CMLLPRQYTLNATVEWYNKSEGDVPEEFMDYVILTPLAVLTCGLQEAYILDKGRRYMY LFSVSCVGITGTVSIILVSLSLLILICYYRCGRLLICPRGFELLPEFTEEEEEKEKLL THNDIEVQVPIRTRRLLVPWIRESKMWVLPPPLPPRPPHLIEFPPSPPPSPGPMHMVV CMPA
26614	SNV	A	G	0.0373303	6	6	100	5	11	45.4545		No	UL20	HHV5wtgp025	type 1 membrane protein	membrane protein UL20	AAR31585.1	GI:39842041	MLGIRAMLVMLDYYWIQLITNNGTRSNNTDTIFVSLLTGPNGVT RTAIGGLYSNYTNLTGAFGFTSTNMSATNSSAEDNWSVTNLTESCINRGESYVTTIWL LDCTKNDTYWYYGNAYNHTCEGTISGYLLGMCKLWKSWVNNITSYNTVRVESLGNETR CMLLPRQYTLNATVEWYNKSEGDVPEEFMDYVILTPLAVLTCGLQEAYILDKGRRYMY LFSVSCVGITGTVSIILVSLSLLILICYYRCGRLLICPRGFELLPEFTEEEEEKEKLL THNDIEVQVPIRTRRLLVPWIRESKMWVLPPPLPPRPPHLIEFPPSPPPSPGPMHMVV CMPA
26901	SNV	G	A	0.0175339	5	6	83.3333	2	11	18.1818		No	UL21A	HHV5wtgp026	facilitates viral DNA synthesis	protein UL21A	AAR31586.1	GI:39842042	MGGSPVPQLTTVTQGLMPSVRMDFRARRPLRRLAFYAPRARRRL FQNHIHPEQRRVLVGEGDEEMLPDLPMEIDIVIDRPPQQPLPNPLVLLLDDVPPHVPG FAPYRVPRPHPMIPEEHWDQF
39412	SNV	G	A	0.0294118	3	6	50	0	11	0		No	UL31	HHV5wtgp036	DURP family	protein UL31	AAR31596.1	GI:39842052	MGDKPTLVTLLTVAVSSPPPSSPLPLVSFTELLLPPPSVAAAAV AATATSEVGEKTAEQEVAAAGPETRNERRENREDEGGETRTTGTTAVKRSHDGIPRQL AERLRLCRHMDPEQDYRLPAQDVVTSWIEALRDADRDNYGRCVRHAKIHRSASHLTAY ESYLVSITEQYNTASNVTEKASYVQGCIFLSFPVIYNNTQGCGYKYDWSNVVTPKAAY AELFFLLCSTSESSVVLQPLITKGGLCSSMAVYDEETMRQSQAVQIGFLHTQLVMVPF VPHACPHYAVPFTTPGKPGCGGAPSGVAGLEETAPFGRVSVTRHGATLLCRVDHLTWI SKRVTTYGHKKITRYLAQFRGTMDDDEAALPGEDEAWIASKNVQYEFMGLIFTVNVDS …
43409	SNV	T	C	0.0373303	6	6	100	5	11	45.4545		-
43435..43437	Deletion	CAC	-	0.0373303	6	6	100	5	11	45.4545	AAR31598.1:p.Thr9del	Yes	UL33	HHV5wtgp038	type 3 membrane protein; 7 transmembrane domains; putative chemokine receptor; involved in intracellular signalling; GPCR family	envelope glycoprotein UL33	AAR31598.1	GI:39842054	MDTIIHNTTNRSTDTPHVNITCNITEPLSAIRTTEAVINTFIIF VGGPLNAIVLITQLLTNRVLGYSTPTIYMTNLYSTNFLTLTVLPFIVLSNQWLLPASV ASCKFLSVIYYSSCTVGFATVALIAADRYRVLHKRTYARQSYRSTYIILLLTWFAGLI FSMPAAVYTTVVIHNGTNGQSSNGHATCVLYFIADEVYTVLLSWKVLLTLVWGAAPVI MMTWFYAFFYSTVQRASQKQRSRTLTFVSVLLISFVALQTPYVSIMIFNSYATAAWPM DCEHLTLRRTIGTLSRLVPHLHCLINPILYALLGHDFLQRMRQCFRGQLLDRRAFLRS QQNQRATAETNLAAGNNSQSVATSLDTSSKNCNQHAKRSVSFNFPSGTWKGGQKTASN …
43439	SNV	A	T	0.0373303	6	6	100	5	11	45.4545	AAR31598.1:p.Thr9Ser	Yes	UL33	HHV5wtgp038	type 3 membrane protein; 7 transmembrane domains; putative chemokine receptor; involved in intracellular signalling; GPCR family	envelope glycoprotein UL33	AAR31598.1	GI:39842054	MDTIIHNTTNRSTDTPHVNITCNITEPLSAIRTTEAVINTFIIF VGGPLNAIVLITQLLTNRVLGYSTPTIYMTNLYSTNFLTLTVLPFIVLSNQWLLPASV ASCKFLSVIYYSSCTVGFATVALIAADRYRVLHKRTYARQSYRSTYIILLLTWFAGLI FSMPAAVYTTVVIHNGTNGQSSNGHATCVLYFIADEVYTVLLSWKVLLTLVWGAAPVI MMTWFYAFFYSTVQRASQKQRSRTLTFVSVLLISFVALQTPYVSIMIFNSYATAAWPM DCEHLTLRRTIGTLSRLVPHLHCLINPILYALLGHDFLQRMRQCFRGQLLDRRAFLRS QQNQRATAETNLAAGNNSQSVATSLDTSSKNCNQHAKRSVSFNFPSGTWKGGQKTASN …
43504..43509	MNV	ACCCGG	TTTTAA	0.0373303	6	6	100	5	11	45.4545		-
43541	SNV	T	A	0.0276341	4	6	66.6667	1	11	9.09091		-
43554	SNV	C	T	0.0276341	4	6	66.6667	1	11	9.09091		-
43563	SNV	A	C	0.0373303	6	6	100	5	11	45.4545	AAR31598.1:p.Asn10Thr	Yes	UL33	HHV5wtgp038	type 3 membrane protein; 7 transmembrane domains; putative chemokine receptor; involved in intracellular signalling; GPCR family	envelope glycoprotein UL33	AAR31598.1	GI:39842054	MDTIIHNTTNRSTDTPHVNITCNITEPLSAIRTTEAVINTFIIF VGGPLNAIVLITQLLTNRVLGYSTPTIYMTNLYSTNFLTLTVLPFIVLSNQWLLPASV ASCKFLSVIYYSSCTVGFATVALIAADRYRVLHKRTYARQSYRSTYIILLLTWFAGLI FSMPAAVYTTVVIHNGTNGQSSNGHATCVLYFIADEVYTVLLSWKVLLTLVWGAAPVI MMTWFYAFFYSTVQRASQKQRSRTLTFVSVLLISFVALQTPYVSIMIFNSYATAAWPM DCEHLTLRRTIGTLSRLVPHLHCLINPILYALLGHDFLQRMRQCFRGQLLDRRAFLRS QQNQRATAETNLAAGNNSQSVATSLDTSSKNCNQHAKRSVSFNFPSGTWKGGQKTASN …
43569..43570	MNV	GT	AC	0.0373303	6	6	100	5	11	45.4545	AAR31598.1:p.Ser12Asn	Yes	UL33	HHV5wtgp038	type 3 membrane protein; 7 transmembrane domains; putative chemokine receptor; involved in intracellular signalling; GPCR family	envelope glycoprotein UL33	AAR31598.1	GI:39842054	MDTIIHNTTNRSTDTPHVNITCNITEPLSAIRTTEAVINTFIIF VGGPLNAIVLITQLLTNRVLGYSTPTIYMTNLYSTNFLTLTVLPFIVLSNQWLLPASV ASCKFLSVIYYSSCTVGFATVALIAADRYRVLHKRTYARQSYRSTYIILLLTWFAGLI FSMPAAVYTTVVIHNGTNGQSSNGHATCVLYFIADEVYTVLLSWKVLLTLVWGAAPVI MMTWFYAFFYSTVQRASQKQRSRTLTFVSVLLISFVALQTPYVSIMIFNSYATAAWPM DCEHLTLRRTIGTLSRLVPHLHCLINPILYALLGHDFLQRMRQCFRGQLLDRRAFLRS QQNQRATAETNLAAGNNSQSVATSLDTSSKNCNQHAKRSVSFNFPSGTWKGGQKTASN …
43574..43575	MNV	GA	AC	0.0373303	6	6	100	5	11	45.4545	AAR31598.1:p.Asp14Thr	Yes	UL33	HHV5wtgp038	type 3 membrane protein; 7 transmembrane domains; putative chemokine receptor; involved in intracellular signalling; GPCR family	envelope glycoprotein UL33	AAR31598.1	GI:39842054	MDTIIHNTTNRSTDTPHVNITCNITEPLSAIRTTEAVINTFIIF VGGPLNAIVLITQLLTNRVLGYSTPTIYMTNLYSTNFLTLTVLPFIVLSNQWLLPASV ASCKFLSVIYYSSCTVGFATVALIAADRYRVLHKRTYARQSYRSTYIILLLTWFAGLI FSMPAAVYTTVVIHNGTNGQSSNGHATCVLYFIADEVYTVLLSWKVLLTLVWGAAPVI MMTWFYAFFYSTVQRASQKQRSRTLTFVSVLLISFVALQTPYVSIMIFNSYATAAWPM DCEHLTLRRTIGTLSRLVPHLHCLINPILYALLGHDFLQRMRQCFRGQLLDRRAFLRS QQNQRATAETNLAAGNNSQSVATSLDTSSKNCNQHAKRSVSFNFPSGTWKGGQKTASN …
43585..43586	MNV	TG	CA	0.0373303	6	6	100	5	11	45.4545	AAR31598.1:p.Val18Ile	Yes	UL33	HHV5wtgp038	type 3 membrane protein; 7 transmembrane domains; putative chemokine receptor; involved in intracellular signalling; GPCR family	envelope glycoprotein UL33	AAR31598.1	GI:39842054	MDTIIHNTTNRSTDTPHVNITCNITEPLSAIRTTEAVINTFIIF VGGPLNAIVLITQLLTNRVLGYSTPTIYMTNLYSTNFLTLTVLPFIVLSNQWLLPASV ASCKFLSVIYYSSCTVGFATVALIAADRYRVLHKRTYARQSYRSTYIILLLTWFAGLI FSMPAAVYTTVVIHNGTNGQSSNGHATCVLYFIADEVYTVLLSWKVLLTLVWGAAPVI MMTWFYAFFYSTVQRASQKQRSRTLTFVSVLLISFVALQTPYVSIMIFNSYATAAWPM DCEHLTLRRTIGTLSRLVPHLHCLINPILYALLGHDFLQRMRQCFRGQLLDRRAFLRS QQNQRATAETNLAAGNNSQSVATSLDTSSKNCNQHAKRSVSFNFPSGTWKGGQKTASN …
43591..43593	MNV	CAT	TGA	0.0373303	6	6	100	5	11	45.4545	AAR31598.1:p.Ile20Asp	Yes	UL33	HHV5wtgp038	type 3 membrane protein; 7 transmembrane domains; putative chemokine receptor; involved in intracellular signalling; GPCR family	envelope glycoprotein UL33	AAR31598.1	GI:39842054	MDTIIHNTTNRSTDTPHVNITCNITEPLSAIRTTEAVINTFIIF VGGPLNAIVLITQLLTNRVLGYSTPTIYMTNLYSTNFLTLTVLPFIVLSNQWLLPASV ASCKFLSVIYYSSCTVGFATVALIAADRYRVLHKRTYARQSYRSTYIILLLTWFAGLI FSMPAAVYTTVVIHNGTNGQSSNGHATCVLYFIADEVYTVLLSWKVLLTLVWGAAPVI MMTWFYAFFYSTVQRASQKQRSRTLTFVSVLLISFVALQTPYVSIMIFNSYATAAWPM DCEHLTLRRTIGTLSRLVPHLHCLINPILYALLGHDFLQRMRQCFRGQLLDRRAFLRS QQNQRATAETNLAAGNNSQSVATSLDTSSKNCNQHAKRSVSFNFPSGTWKGGQKTASN …
43597	SNV	C	T	0.0373303	6	6	100	5	11	45.4545		No	UL33	HHV5wtgp038	type 3 membrane protein; 7 transmembrane domains; putative chemokine receptor; involved in intracellular signalling; GPCR family	envelope glycoprotein UL33	AAR31598.1	GI:39842054	MDTIIHNTTNRSTDTPHVNITCNITEPLSAIRTTEAVINTFIIF VGGPLNAIVLITQLLTNRVLGYSTPTIYMTNLYSTNFLTLTVLPFIVLSNQWLLPASV ASCKFLSVIYYSSCTVGFATVALIAADRYRVLHKRTYARQSYRSTYIILLLTWFAGLI FSMPAAVYTTVVIHNGTNGQSSNGHATCVLYFIADEVYTVLLSWKVLLTLVWGAAPVI MMTWFYAFFYSTVQRASQKQRSRTLTFVSVLLISFVALQTPYVSIMIFNSYATAAWPM DCEHLTLRRTIGTLSRLVPHLHCLINPILYALLGHDFLQRMRQCFRGQLLDRRAFLRS QQNQRATAETNLAAGNNSQSVATSLDTSSKNCNQHAKRSVSFNFPSGTWKGGQKTASN …
43600	SNV	T	C	0.0373303	6	6	100	5	11	45.4545		No	UL33	HHV5wtgp038	type 3 membrane protein; 7 transmembrane domains; putative chemokine receptor; involved in intracellular signalling; GPCR family	envelope glycoprotein UL33	AAR31598.1	GI:39842054	MDTIIHNTTNRSTDTPHVNITCNITEPLSAIRTTEAVINTFIIF VGGPLNAIVLITQLLTNRVLGYSTPTIYMTNLYSTNFLTLTVLPFIVLSNQWLLPASV ASCKFLSVIYYSSCTVGFATVALIAADRYRVLHKRTYARQSYRSTYIILLLTWFAGLI FSMPAAVYTTVVIHNGTNGQSSNGHATCVLYFIADEVYTVLLSWKVLLTLVWGAAPVI MMTWFYAFFYSTVQRASQKQRSRTLTFVSVLLISFVALQTPYVSIMIFNSYATAAWPM DCEHLTLRRTIGTLSRLVPHLHCLINPILYALLGHDFLQRMRQCFRGQLLDRRAFLRS QQNQRATAETNLAAGNNSQSVATSLDTSSKNCNQHAKRSVSFNFPSGTWKGGQKTASN …
43611	SNV	A	G	0.0373303	6	6	100	5	11	45.4545	AAR31598.1:p.Glu26Gly	Yes	UL33	HHV5wtgp038	type 3 membrane protein; 7 transmembrane domains; putative chemokine receptor; involved in intracellular signalling; GPCR family	envelope glycoprotein UL33	AAR31598.1	GI:39842054	MDTIIHNTTNRSTDTPHVNITCNITEPLSAIRTTEAVINTFIIF VGGPLNAIVLITQLLTNRVLGYSTPTIYMTNLYSTNFLTLTVLPFIVLSNQWLLPASV ASCKFLSVIYYSSCTVGFATVALIAADRYRVLHKRTYARQSYRSTYIILLLTWFAGLI FSMPAAVYTTVVIHNGTNGQSSNGHATCVLYFIADEVYTVLLSWKVLLTLVWGAAPVI MMTWFYAFFYSTVQRASQKQRSRTLTFVSVLLISFVALQTPYVSIMIFNSYATAAWPM DCEHLTLRRTIGTLSRLVPHLHCLINPILYALLGHDFLQRMRQCFRGQLLDRRAFLRS QQNQRATAETNLAAGNNSQSVATSLDTSSKNCNQHAKRSVSFNFPSGTWKGGQKTASN …
43618	SNV	A	G	0.0276341	4	6	66.6667	1	11	9.09091		No	UL33	HHV5wtgp038	type 3 membrane protein; 7 transmembrane domains; putative chemokine receptor; involved in intracellular signalling; GPCR family	envelope glycoprotein UL33	AAR31598.1	GI:39842054	MDTIIHNTTNRSTDTPHVNITCNITEPLSAIRTTEAVINTFIIF VGGPLNAIVLITQLLTNRVLGYSTPTIYMTNLYSTNFLTLTVLPFIVLSNQWLLPASV ASCKFLSVIYYSSCTVGFATVALIAADRYRVLHKRTYARQSYRSTYIILLLTWFAGLI FSMPAAVYTTVVIHNGTNGQSSNGHATCVLYFIADEVYTVLLSWKVLLTLVWGAAPVI MMTWFYAFFYSTVQRASQKQRSRTLTFVSVLLISFVALQTPYVSIMIFNSYATAAWPM DCEHLTLRRTIGTLSRLVPHLHCLINPILYALLGHDFLQRMRQCFRGQLLDRRAFLRS QQNQRATAETNLAAGNNSQSVATSLDTSSKNCNQHAKRSVSFNFPSGTWKGGQKTASN …
43620	SNV	C	T	0.0373303	6	6	100	5	11	45.4545	AAR31598.1:p.Ser29Phe	Yes	UL33	HHV5wtgp038	type 3 membrane protein; 7 transmembrane domains; putative chemokine receptor; involved in intracellular signalling; GPCR family	envelope glycoprotein UL33	AAR31598.1	GI:39842054	MDTIIHNTTNRSTDTPHVNITCNITEPLSAIRTTEAVINTFIIF VGGPLNAIVLITQLLTNRVLGYSTPTIYMTNLYSTNFLTLTVLPFIVLSNQWLLPASV ASCKFLSVIYYSSCTVGFATVALIAADRYRVLHKRTYARQSYRSTYIILLLTWFAGLI FSMPAAVYTTVVIHNGTNGQSSNGHATCVLYFIADEVYTVLLSWKVLLTLVWGAAPVI MMTWFYAFFYSTVQRASQKQRSRTLTFVSVLLISFVALQTPYVSIMIFNSYATAAWPM DCEHLTLRRTIGTLSRLVPHLHCLINPILYALLGHDFLQRMRQCFRGQLLDRRAFLRS QQNQRATAETNLAAGNNSQSVATSLDTSSKNCNQHAKRSVSFNFPSGTWKGGQKTASN …
43636	SNV	A	C	0.0373303	6	6	100	5	11	45.4545		No	UL33	HHV5wtgp038	type 3 membrane protein; 7 transmembrane domains; putative chemokine receptor; involved in intracellular signalling; GPCR family	envelope glycoprotein UL33	AAR31598.1	GI:39842054	MDTIIHNTTNRSTDTPHVNITCNITEPLSAIRTTEAVINTFIIF VGGPLNAIVLITQLLTNRVLGYSTPTIYMTNLYSTNFLTLTVLPFIVLSNQWLLPASV ASCKFLSVIYYSSCTVGFATVALIAADRYRVLHKRTYARQSYRSTYIILLLTWFAGLI FSMPAAVYTTVVIHNGTNGQSSNGHATCVLYFIADEVYTVLLSWKVLLTLVWGAAPVI MMTWFYAFFYSTVQRASQKQRSRTLTFVSVLLISFVALQTPYVSIMIFNSYATAAWPM DCEHLTLRRTIGTLSRLVPHLHCLINPILYALLGHDFLQRMRQCFRGQLLDRRAFLRS QQNQRATAETNLAAGNNSQSVATSLDTSSKNCNQHAKRSVSFNFPSGTWKGGQKTASN …
43646	SNV	A	C	0.0373303	6	6	100	5	11	45.4545	AAR31598.1:p.Ile38Leu	Yes	UL33	HHV5wtgp038	type 3 membrane protein; 7 transmembrane domains; putative chemokine receptor; involved in intracellular signalling; GPCR family	envelope glycoprotein UL33	AAR31598.1	GI:39842054	MDTIIHNTTNRSTDTPHVNITCNITEPLSAIRTTEAVINTFIIF VGGPLNAIVLITQLLTNRVLGYSTPTIYMTNLYSTNFLTLTVLPFIVLSNQWLLPASV ASCKFLSVIYYSSCTVGFATVALIAADRYRVLHKRTYARQSYRSTYIILLLTWFAGLI FSMPAAVYTTVVIHNGTNGQSSNGHATCVLYFIADEVYTVLLSWKVLLTLVWGAAPVI MMTWFYAFFYSTVQRASQKQRSRTLTFVSVLLISFVALQTPYVSIMIFNSYATAAWPM DCEHLTLRRTIGTLSRLVPHLHCLINPILYALLGHDFLQRMRQCFRGQLLDRRAFLRS QQNQRATAETNLAAGNNSQSVATSLDTSSKNCNQHAKRSVSFNFPSGTWKGGQKTASN …
43651	SNV	C	T	0.0276341	4	6	66.6667	1	11	9.09091		No	UL33	HHV5wtgp038	type 3 membrane protein; 7 transmembrane domains; putative chemokine receptor; involved in intracellular signalling; GPCR family	envelope glycoprotein UL33	AAR31598.1	GI:39842054	MDTIIHNTTNRSTDTPHVNITCNITEPLSAIRTTEAVINTFIIF VGGPLNAIVLITQLLTNRVLGYSTPTIYMTNLYSTNFLTLTVLPFIVLSNQWLLPASV ASCKFLSVIYYSSCTVGFATVALIAADRYRVLHKRTYARQSYRSTYIILLLTWFAGLI FSMPAAVYTTVVIHNGTNGQSSNGHATCVLYFIADEVYTVLLSWKVLLTLVWGAAPVI MMTWFYAFFYSTVQRASQKQRSRTLTFVSVLLISFVALQTPYVSIMIFNSYATAAWPM DCEHLTLRRTIGTLSRLVPHLHCLINPILYALLGHDFLQRMRQCFRGQLLDRRAFLRS QQNQRATAETNLAAGNNSQSVATSLDTSSKNCNQHAKRSVSFNFPSGTWKGGQKTASN …
43654	SNV	G	A	0.0373303	6	6	100	5	11	45.4545		No	UL33	HHV5wtgp038	type 3 membrane protein; 7 transmembrane domains; putative chemokine receptor; involved in intracellular signalling; GPCR family	envelope glycoprotein UL33	AAR31598.1	GI:39842054	MDTIIHNTTNRSTDTPHVNITCNITEPLSAIRTTEAVINTFIIF VGGPLNAIVLITQLLTNRVLGYSTPTIYMTNLYSTNFLTLTVLPFIVLSNQWLLPASV ASCKFLSVIYYSSCTVGFATVALIAADRYRVLHKRTYARQSYRSTYIILLLTWFAGLI FSMPAAVYTTVVIHNGTNGQSSNGHATCVLYFIADEVYTVLLSWKVLLTLVWGAAPVI MMTWFYAFFYSTVQRASQKQRSRTLTFVSVLLISFVALQTPYVSIMIFNSYATAAWPM DCEHLTLRRTIGTLSRLVPHLHCLINPILYALLGHDFLQRMRQCFRGQLLDRRAFLRS QQNQRATAETNLAAGNNSQSVATSLDTSSKNCNQHAKRSVSFNFPSGTWKGGQKTASN …
43654..43655	MNV	GT	AC	0.00630252	4	6	66.6667	0	11	0	AAR31598.1:p.Phe41Leu	Yes	UL33	HHV5wtgp038	type 3 membrane protein; 7 transmembrane domains; putative chemokine receptor; involved in intracellular signalling; GPCR family	envelope glycoprotein UL33	AAR31598.1	GI:39842054	MDTIIHNTTNRSTDTPHVNITCNITEPLSAIRTTEAVINTFIIF VGGPLNAIVLITQLLTNRVLGYSTPTIYMTNLYSTNFLTLTVLPFIVLSNQWLLPASV ASCKFLSVIYYSSCTVGFATVALIAADRYRVLHKRTYARQSYRSTYIILLLTWFAGLI FSMPAAVYTTVVIHNGTNGQSSNGHATCVLYFIADEVYTVLLSWKVLLTLVWGAAPVI MMTWFYAFFYSTVQRASQKQRSRTLTFVSVLLISFVALQTPYVSIMIFNSYATAAWPM DCEHLTLRRTIGTLSRLVPHLHCLINPILYALLGHDFLQRMRQCFRGQLLDRRAFLRS QQNQRATAETNLAAGNNSQSVATSLDTSSKNCNQHAKRSVSFNFPSGTWKGGQKTASN …
43663	SNV	T	C	0.0373303	6	6	100	5	11	45.4545		No	UL33	HHV5wtgp038	type 3 membrane protein; 7 transmembrane domains; putative chemokine receptor; involved in intracellular signalling; GPCR family	envelope glycoprotein UL33	AAR31598.1	GI:39842054	MDTIIHNTTNRSTDTPHVNITCNITEPLSAIRTTEAVINTFIIF VGGPLNAIVLITQLLTNRVLGYSTPTIYMTNLYSTNFLTLTVLPFIVLSNQWLLPASV ASCKFLSVIYYSSCTVGFATVALIAADRYRVLHKRTYARQSYRSTYIILLLTWFAGLI FSMPAAVYTTVVIHNGTNGQSSNGHATCVLYFIADEVYTVLLSWKVLLTLVWGAAPVI MMTWFYAFFYSTVQRASQKQRSRTLTFVSVLLISFVALQTPYVSIMIFNSYATAAWPM DCEHLTLRRTIGTLSRLVPHLHCLINPILYALLGHDFLQRMRQCFRGQLLDRRAFLRS QQNQRATAETNLAAGNNSQSVATSLDTSSKNCNQHAKRSVSFNFPSGTWKGGQKTASN …
43675	SNV	C	T	0.0373303	6	6	100	5	11	45.4545		No	UL33	HHV5wtgp038	type 3 membrane protein; 7 transmembrane domains; putative chemokine receptor; involved in intracellular signalling; GPCR family	envelope glycoprotein UL33	AAR31598.1	GI:39842054	MDTIIHNTTNRSTDTPHVNITCNITEPLSAIRTTEAVINTFIIF VGGPLNAIVLITQLLTNRVLGYSTPTIYMTNLYSTNFLTLTVLPFIVLSNQWLLPASV ASCKFLSVIYYSSCTVGFATVALIAADRYRVLHKRTYARQSYRSTYIILLLTWFAGLI FSMPAAVYTTVVIHNGTNGQSSNGHATCVLYFIADEVYTVLLSWKVLLTLVWGAAPVI MMTWFYAFFYSTVQRASQKQRSRTLTFVSVLLISFVALQTPYVSIMIFNSYATAAWPM DCEHLTLRRTIGTLSRLVPHLHCLINPILYALLGHDFLQRMRQCFRGQLLDRRAFLRS QQNQRATAETNLAAGNNSQSVATSLDTSSKNCNQHAKRSVSFNFPSGTWKGGQKTASN …
43684	SNV	T	C	0.0373303	6	6	100	5	11	45.4545		No	UL33	HHV5wtgp038	type 3 membrane protein; 7 transmembrane domains; putative chemokine receptor; involved in intracellular signalling; GPCR family	envelope glycoprotein UL33	AAR31598.1	GI:39842054	MDTIIHNTTNRSTDTPHVNITCNITEPLSAIRTTEAVINTFIIF VGGPLNAIVLITQLLTNRVLGYSTPTIYMTNLYSTNFLTLTVLPFIVLSNQWLLPASV ASCKFLSVIYYSSCTVGFATVALIAADRYRVLHKRTYARQSYRSTYIILLLTWFAGLI FSMPAAVYTTVVIHNGTNGQSSNGHATCVLYFIADEVYTVLLSWKVLLTLVWGAAPVI MMTWFYAFFYSTVQRASQKQRSRTLTFVSVLLISFVALQTPYVSIMIFNSYATAAWPM DCEHLTLRRTIGTLSRLVPHLHCLINPILYALLGHDFLQRMRQCFRGQLLDRRAFLRS QQNQRATAETNLAAGNNSQSVATSLDTSSKNCNQHAKRSVSFNFPSGTWKGGQKTASN …
43705	SNV	G	A	0.0276341	4	6	66.6667	1	11	9.09091		No	UL33	HHV5wtgp038	type 3 membrane protein; 7 transmembrane domains; putative chemokine receptor; involved in intracellular signalling; GPCR family	envelope glycoprotein UL33	AAR31598.1	GI:39842054	MDTIIHNTTNRSTDTPHVNITCNITEPLSAIRTTEAVINTFIIF VGGPLNAIVLITQLLTNRVLGYSTPTIYMTNLYSTNFLTLTVLPFIVLSNQWLLPASV ASCKFLSVIYYSSCTVGFATVALIAADRYRVLHKRTYARQSYRSTYIILLLTWFAGLI FSMPAAVYTTVVIHNGTNGQSSNGHATCVLYFIADEVYTVLLSWKVLLTLVWGAAPVI MMTWFYAFFYSTVQRASQKQRSRTLTFVSVLLISFVALQTPYVSIMIFNSYATAAWPM DCEHLTLRRTIGTLSRLVPHLHCLINPILYALLGHDFLQRMRQCFRGQLLDRRAFLRS QQNQRATAETNLAAGNNSQSVATSLDTSSKNCNQHAKRSVSFNFPSGTWKGGQKTASN …
43714	SNV	G	C	0.0276341	4	6	66.6667	1	11	9.09091		No	UL33	HHV5wtgp038	type 3 membrane protein; 7 transmembrane domains; putative chemokine receptor; involved in intracellular signalling; GPCR family	envelope glycoprotein UL33	AAR31598.1	GI:39842054	MDTIIHNTTNRSTDTPHVNITCNITEPLSAIRTTEAVINTFIIF VGGPLNAIVLITQLLTNRVLGYSTPTIYMTNLYSTNFLTLTVLPFIVLSNQWLLPASV ASCKFLSVIYYSSCTVGFATVALIAADRYRVLHKRTYARQSYRSTYIILLLTWFAGLI FSMPAAVYTTVVIHNGTNGQSSNGHATCVLYFIADEVYTVLLSWKVLLTLVWGAAPVI MMTWFYAFFYSTVQRASQKQRSRTLTFVSVLLISFVALQTPYVSIMIFNSYATAAWPM DCEHLTLRRTIGTLSRLVPHLHCLINPILYALLGHDFLQRMRQCFRGQLLDRRAFLRS QQNQRATAETNLAAGNNSQSVATSLDTSSKNCNQHAKRSVSFNFPSGTWKGGQKTASN …
43723..43724	MNV	AT	GC	0.0373303	6	6	100	5	11	45.4545		No	UL33	HHV5wtgp038	type 3 membrane protein; 7 transmembrane domains; putative chemokine receptor; involved in intracellular signalling; GPCR family	envelope glycoprotein UL33	AAR31598.1	GI:39842054	MDTIIHNTTNRSTDTPHVNITCNITEPLSAIRTTEAVINTFIIF VGGPLNAIVLITQLLTNRVLGYSTPTIYMTNLYSTNFLTLTVLPFIVLSNQWLLPASV ASCKFLSVIYYSSCTVGFATVALIAADRYRVLHKRTYARQSYRSTYIILLLTWFAGLI FSMPAAVYTTVVIHNGTNGQSSNGHATCVLYFIADEVYTVLLSWKVLLTLVWGAAPVI MMTWFYAFFYSTVQRASQKQRSRTLTFVSVLLISFVALQTPYVSIMIFNSYATAAWPM DCEHLTLRRTIGTLSRLVPHLHCLINPILYALLGHDFLQRMRQCFRGQLLDRRAFLRS QQNQRATAETNLAAGNNSQSVATSLDTSSKNCNQHAKRSVSFNFPSGTWKGGQKTASN …
43726	SNV	G	T	0.0373303	6	6	100	5	11	45.4545	AAR31598.1:p.Leu64Phe	Yes	UL33	HHV5wtgp038	type 3 membrane protein; 7 transmembrane domains; putative chemokine receptor; involved in intracellular signalling; GPCR family	envelope glycoprotein UL33	AAR31598.1	GI:39842054	MDTIIHNTTNRSTDTPHVNITCNITEPLSAIRTTEAVINTFIIF VGGPLNAIVLITQLLTNRVLGYSTPTIYMTNLYSTNFLTLTVLPFIVLSNQWLLPASV ASCKFLSVIYYSSCTVGFATVALIAADRYRVLHKRTYARQSYRSTYIILLLTWFAGLI FSMPAAVYTTVVIHNGTNGQSSNGHATCVLYFIADEVYTVLLSWKVLLTLVWGAAPVI MMTWFYAFFYSTVQRASQKQRSRTLTFVSVLLISFVALQTPYVSIMIFNSYATAAWPM DCEHLTLRRTIGTLSRLVPHLHCLINPILYALLGHDFLQRMRQCFRGQLLDRRAFLRS QQNQRATAETNLAAGNNSQSVATSLDTSSKNCNQHAKRSVSFNFPSGTWKGGQKTASN …
43738	SNV	C	G	0.0373303	6	6	100	5	11	45.4545		No	UL33	HHV5wtgp038	type 3 membrane protein; 7 transmembrane domains; putative chemokine receptor; involved in intracellular signalling; GPCR family	envelope glycoprotein UL33	AAR31598.1	GI:39842054	MDTIIHNTTNRSTDTPHVNITCNITEPLSAIRTTEAVINTFIIF VGGPLNAIVLITQLLTNRVLGYSTPTIYMTNLYSTNFLTLTVLPFIVLSNQWLLPASV ASCKFLSVIYYSSCTVGFATVALIAADRYRVLHKRTYARQSYRSTYIILLLTWFAGLI FSMPAAVYTTVVIHNGTNGQSSNGHATCVLYFIADEVYTVLLSWKVLLTLVWGAAPVI MMTWFYAFFYSTVQRASQKQRSRTLTFVSVLLISFVALQTPYVSIMIFNSYATAAWPM DCEHLTLRRTIGTLSRLVPHLHCLINPILYALLGHDFLQRMRQCFRGQLLDRRAFLRS QQNQRATAETNLAAGNNSQSVATSLDTSSKNCNQHAKRSVSFNFPSGTWKGGQKTASN …
43786	SNV	C	T	0.0373303	6	6	100	5	11	45.4545		No	UL33	HHV5wtgp038	type 3 membrane protein; 7 transmembrane domains; putative chemokine receptor; involved in intracellular signalling; GPCR family	envelope glycoprotein UL33	AAR31598.1	GI:39842054	MDTIIHNTTNRSTDTPHVNITCNITEPLSAIRTTEAVINTFIIF VGGPLNAIVLITQLLTNRVLGYSTPTIYMTNLYSTNFLTLTVLPFIVLSNQWLLPASV ASCKFLSVIYYSSCTVGFATVALIAADRYRVLHKRTYARQSYRSTYIILLLTWFAGLI FSMPAAVYTTVVIHNGTNGQSSNGHATCVLYFIADEVYTVLLSWKVLLTLVWGAAPVI MMTWFYAFFYSTVQRASQKQRSRTLTFVSVLLISFVALQTPYVSIMIFNSYATAAWPM DCEHLTLRRTIGTLSRLVPHLHCLINPILYALLGHDFLQRMRQCFRGQLLDRRAFLRS QQNQRATAETNLAAGNNSQSVATSLDTSSKNCNQHAKRSVSFNFPSGTWKGGQKTASN …
43792..43793	MNV	AC	GT	0.0276341	4	6	66.6667	1	11	9.09091		No	UL33	HHV5wtgp038	type 3 membrane protein; 7 transmembrane domains; putative chemokine receptor; involved in intracellular signalling; GPCR family	envelope glycoprotein UL33	AAR31598.1	GI:39842054	MDTIIHNTTNRSTDTPHVNITCNITEPLSAIRTTEAVINTFIIF VGGPLNAIVLITQLLTNRVLGYSTPTIYMTNLYSTNFLTLTVLPFIVLSNQWLLPASV ASCKFLSVIYYSSCTVGFATVALIAADRYRVLHKRTYARQSYRSTYIILLLTWFAGLI FSMPAAVYTTVVIHNGTNGQSSNGHATCVLYFIADEVYTVLLSWKVLLTLVWGAAPVI MMTWFYAFFYSTVQRASQKQRSRTLTFVSVLLISFVALQTPYVSIMIFNSYATAAWPM DCEHLTLRRTIGTLSRLVPHLHCLINPILYALLGHDFLQRMRQCFRGQLLDRRAFLRS QQNQRATAETNLAAGNNSQSVATSLDTSSKNCNQHAKRSVSFNFPSGTWKGGQKTASN …
43795	SNV	G	A	0.0373303	6	6	100	5	11	45.4545		No	UL33	HHV5wtgp038	type 3 membrane protein; 7 transmembrane domains; putative chemokine receptor; involved in intracellular signalling; GPCR family	envelope glycoprotein UL33	AAR31598.1	GI:39842054	MDTIIHNTTNRSTDTPHVNITCNITEPLSAIRTTEAVINTFIIF VGGPLNAIVLITQLLTNRVLGYSTPTIYMTNLYSTNFLTLTVLPFIVLSNQWLLPASV ASCKFLSVIYYSSCTVGFATVALIAADRYRVLHKRTYARQSYRSTYIILLLTWFAGLI FSMPAAVYTTVVIHNGTNGQSSNGHATCVLYFIADEVYTVLLSWKVLLTLVWGAAPVI MMTWFYAFFYSTVQRASQKQRSRTLTFVSVLLISFVALQTPYVSIMIFNSYATAAWPM DCEHLTLRRTIGTLSRLVPHLHCLINPILYALLGHDFLQRMRQCFRGQLLDRRAFLRS QQNQRATAETNLAAGNNSQSVATSLDTSSKNCNQHAKRSVSFNFPSGTWKGGQKTASN …
43810	SNV	G	C	0.0373303	6	6	100	5	11	45.4545		No	UL33	HHV5wtgp038	type 3 membrane protein; 7 transmembrane domains; putative chemokine receptor; involved in intracellular signalling; GPCR family	envelope glycoprotein UL33	AAR31598.1	GI:39842054	MDTIIHNTTNRSTDTPHVNITCNITEPLSAIRTTEAVINTFIIF VGGPLNAIVLITQLLTNRVLGYSTPTIYMTNLYSTNFLTLTVLPFIVLSNQWLLPASV ASCKFLSVIYYSSCTVGFATVALIAADRYRVLHKRTYARQSYRSTYIILLLTWFAGLI FSMPAAVYTTVVIHNGTNGQSSNGHATCVLYFIADEVYTVLLSWKVLLTLVWGAAPVI MMTWFYAFFYSTVQRASQKQRSRTLTFVSVLLISFVALQTPYVSIMIFNSYATAAWPM DCEHLTLRRTIGTLSRLVPHLHCLINPILYALLGHDFLQRMRQCFRGQLLDRRAFLRS QQNQRATAETNLAAGNNSQSVATSLDTSSKNCNQHAKRSVSFNFPSGTWKGGQKTASN …
43816	SNV	C	T	0.0276341	4	6	66.6667	1	11	9.09091		No	UL33	HHV5wtgp038	type 3 membrane protein; 7 transmembrane domains; putative chemokine receptor; involved in intracellular signalling; GPCR family	envelope glycoprotein UL33	AAR31598.1	GI:39842054	MDTIIHNTTNRSTDTPHVNITCNITEPLSAIRTTEAVINTFIIF VGGPLNAIVLITQLLTNRVLGYSTPTIYMTNLYSTNFLTLTVLPFIVLSNQWLLPASV ASCKFLSVIYYSSCTVGFATVALIAADRYRVLHKRTYARQSYRSTYIILLLTWFAGLI FSMPAAVYTTVVIHNGTNGQSSNGHATCVLYFIADEVYTVLLSWKVLLTLVWGAAPVI MMTWFYAFFYSTVQRASQKQRSRTLTFVSVLLISFVALQTPYVSIMIFNSYATAAWPM DCEHLTLRRTIGTLSRLVPHLHCLINPILYALLGHDFLQRMRQCFRGQLLDRRAFLRS QQNQRATAETNLAAGNNSQSVATSLDTSSKNCNQHAKRSVSFNFPSGTWKGGQKTASN …
43843	SNV	T	C	0.0373303	6	6	100	5	11	45.4545		No	UL33	HHV5wtgp038	type 3 membrane protein; 7 transmembrane domains; putative chemokine receptor; involved in intracellular signalling; GPCR family	envelope glycoprotein UL33	AAR31598.1	GI:39842054	MDTIIHNTTNRSTDTPHVNITCNITEPLSAIRTTEAVINTFIIF VGGPLNAIVLITQLLTNRVLGYSTPTIYMTNLYSTNFLTLTVLPFIVLSNQWLLPASV ASCKFLSVIYYSSCTVGFATVALIAADRYRVLHKRTYARQSYRSTYIILLLTWFAGLI FSMPAAVYTTVVIHNGTNGQSSNGHATCVLYFIADEVYTVLLSWKVLLTLVWGAAPVI MMTWFYAFFYSTVQRASQKQRSRTLTFVSVLLISFVALQTPYVSIMIFNSYATAAWPM DCEHLTLRRTIGTLSRLVPHLHCLINPILYALLGHDFLQRMRQCFRGQLLDRRAFLRS QQNQRATAETNLAAGNNSQSVATSLDTSSKNCNQHAKRSVSFNFPSGTWKGGQKTASN …
43856	SNV	T	C	0.0373303	6	6	100	5	11	45.4545		No	UL33	HHV5wtgp038	type 3 membrane protein; 7 transmembrane domains; putative chemokine receptor; involved in intracellular signalling; GPCR family	envelope glycoprotein UL33	AAR31598.1	GI:39842054	MDTIIHNTTNRSTDTPHVNITCNITEPLSAIRTTEAVINTFIIF VGGPLNAIVLITQLLTNRVLGYSTPTIYMTNLYSTNFLTLTVLPFIVLSNQWLLPASV ASCKFLSVIYYSSCTVGFATVALIAADRYRVLHKRTYARQSYRSTYIILLLTWFAGLI FSMPAAVYTTVVIHNGTNGQSSNGHATCVLYFIADEVYTVLLSWKVLLTLVWGAAPVI MMTWFYAFFYSTVQRASQKQRSRTLTFVSVLLISFVALQTPYVSIMIFNSYATAAWPM DCEHLTLRRTIGTLSRLVPHLHCLINPILYALLGHDFLQRMRQCFRGQLLDRRAFLRS QQNQRATAETNLAAGNNSQSVATSLDTSSKNCNQHAKRSVSFNFPSGTWKGGQKTASN …
43867	SNV	T	C	0.0373303	6	6	100	5	11	45.4545		No	UL33	HHV5wtgp038	type 3 membrane protein; 7 transmembrane domains; putative chemokine receptor; involved in intracellular signalling; GPCR family	envelope glycoprotein UL33	AAR31598.1	GI:39842054	MDTIIHNTTNRSTDTPHVNITCNITEPLSAIRTTEAVINTFIIF VGGPLNAIVLITQLLTNRVLGYSTPTIYMTNLYSTNFLTLTVLPFIVLSNQWLLPASV ASCKFLSVIYYSSCTVGFATVALIAADRYRVLHKRTYARQSYRSTYIILLLTWFAGLI FSMPAAVYTTVVIHNGTNGQSSNGHATCVLYFIADEVYTVLLSWKVLLTLVWGAAPVI MMTWFYAFFYSTVQRASQKQRSRTLTFVSVLLISFVALQTPYVSIMIFNSYATAAWPM DCEHLTLRRTIGTLSRLVPHLHCLINPILYALLGHDFLQRMRQCFRGQLLDRRAFLRS QQNQRATAETNLAAGNNSQSVATSLDTSSKNCNQHAKRSVSFNFPSGTWKGGQKTASN …
43879	SNV	C	T	0.0276341	4	6	66.6667	1	11	9.09091		No	UL33	HHV5wtgp038	type 3 membrane protein; 7 transmembrane domains; putative chemokine receptor; involved in intracellular signalling; GPCR family	envelope glycoprotein UL33	AAR31598.1	GI:39842054	MDTIIHNTTNRSTDTPHVNITCNITEPLSAIRTTEAVINTFIIF VGGPLNAIVLITQLLTNRVLGYSTPTIYMTNLYSTNFLTLTVLPFIVLSNQWLLPASV ASCKFLSVIYYSSCTVGFATVALIAADRYRVLHKRTYARQSYRSTYIILLLTWFAGLI FSMPAAVYTTVVIHNGTNGQSSNGHATCVLYFIADEVYTVLLSWKVLLTLVWGAAPVI MMTWFYAFFYSTVQRASQKQRSRTLTFVSVLLISFVALQTPYVSIMIFNSYATAAWPM DCEHLTLRRTIGTLSRLVPHLHCLINPILYALLGHDFLQRMRQCFRGQLLDRRAFLRS QQNQRATAETNLAAGNNSQSVATSLDTSSKNCNQHAKRSVSFNFPSGTWKGGQKTASN …
43907	SNV	C	T	0.0276341	4	6	66.6667	1	11	9.09091		No	UL33	HHV5wtgp038	type 3 membrane protein; 7 transmembrane domains; putative chemokine receptor; involved in intracellular signalling; GPCR family	envelope glycoprotein UL33	AAR31598.1	GI:39842054	MDTIIHNTTNRSTDTPHVNITCNITEPLSAIRTTEAVINTFIIF VGGPLNAIVLITQLLTNRVLGYSTPTIYMTNLYSTNFLTLTVLPFIVLSNQWLLPASV ASCKFLSVIYYSSCTVGFATVALIAADRYRVLHKRTYARQSYRSTYIILLLTWFAGLI FSMPAAVYTTVVIHNGTNGQSSNGHATCVLYFIADEVYTVLLSWKVLLTLVWGAAPVI MMTWFYAFFYSTVQRASQKQRSRTLTFVSVLLISFVALQTPYVSIMIFNSYATAAWPM DCEHLTLRRTIGTLSRLVPHLHCLINPILYALLGHDFLQRMRQCFRGQLLDRRAFLRS QQNQRATAETNLAAGNNSQSVATSLDTSSKNCNQHAKRSVSFNFPSGTWKGGQKTASN …
43924	SNV	A	C	0.0276341	4	6	66.6667	1	11	9.09091		No	UL33	HHV5wtgp038	type 3 membrane protein; 7 transmembrane domains; putative chemokine receptor; involved in intracellular signalling; GPCR family	envelope glycoprotein UL33	AAR31598.1	GI:39842054	MDTIIHNTTNRSTDTPHVNITCNITEPLSAIRTTEAVINTFIIF VGGPLNAIVLITQLLTNRVLGYSTPTIYMTNLYSTNFLTLTVLPFIVLSNQWLLPASV ASCKFLSVIYYSSCTVGFATVALIAADRYRVLHKRTYARQSYRSTYIILLLTWFAGLI FSMPAAVYTTVVIHNGTNGQSSNGHATCVLYFIADEVYTVLLSWKVLLTLVWGAAPVI MMTWFYAFFYSTVQRASQKQRSRTLTFVSVLLISFVALQTPYVSIMIFNSYATAAWPM DCEHLTLRRTIGTLSRLVPHLHCLINPILYALLGHDFLQRMRQCFRGQLLDRRAFLRS QQNQRATAETNLAAGNNSQSVATSLDTSSKNCNQHAKRSVSFNFPSGTWKGGQKTASN …
43939	SNV	T	C	0.0276341	4	6	66.6667	1	11	9.09091		No	UL33	HHV5wtgp038	type 3 membrane protein; 7 transmembrane domains; putative chemokine receptor; involved in intracellular signalling; GPCR family	envelope glycoprotein UL33	AAR31598.1	GI:39842054	MDTIIHNTTNRSTDTPHVNITCNITEPLSAIRTTEAVINTFIIF VGGPLNAIVLITQLLTNRVLGYSTPTIYMTNLYSTNFLTLTVLPFIVLSNQWLLPASV ASCKFLSVIYYSSCTVGFATVALIAADRYRVLHKRTYARQSYRSTYIILLLTWFAGLI FSMPAAVYTTVVIHNGTNGQSSNGHATCVLYFIADEVYTVLLSWKVLLTLVWGAAPVI MMTWFYAFFYSTVQRASQKQRSRTLTFVSVLLISFVALQTPYVSIMIFNSYATAAWPM DCEHLTLRRTIGTLSRLVPHLHCLINPILYALLGHDFLQRMRQCFRGQLLDRRAFLRS QQNQRATAETNLAAGNNSQSVATSLDTSSKNCNQHAKRSVSFNFPSGTWKGGQKTASN …
43948	SNV	C	T	0.0276341	4	6	66.6667	1	11	9.09091		No	UL33	HHV5wtgp038	type 3 membrane protein; 7 transmembrane domains; putative chemokine receptor; involved in intracellular signalling; GPCR family	envelope glycoprotein UL33	AAR31598.1	GI:39842054	MDTIIHNTTNRSTDTPHVNITCNITEPLSAIRTTEAVINTFIIF VGGPLNAIVLITQLLTNRVLGYSTPTIYMTNLYSTNFLTLTVLPFIVLSNQWLLPASV ASCKFLSVIYYSSCTVGFATVALIAADRYRVLHKRTYARQSYRSTYIILLLTWFAGLI FSMPAAVYTTVVIHNGTNGQSSNGHATCVLYFIADEVYTVLLSWKVLLTLVWGAAPVI MMTWFYAFFYSTVQRASQKQRSRTLTFVSVLLISFVALQTPYVSIMIFNSYATAAWPM DCEHLTLRRTIGTLSRLVPHLHCLINPILYALLGHDFLQRMRQCFRGQLLDRRAFLRS QQNQRATAETNLAAGNNSQSVATSLDTSSKNCNQHAKRSVSFNFPSGTWKGGQKTASN …
43980	SNV	T	C	0.0276341	4	6	66.6667	1	11	9.09091	AAR31598.1:p.Ile149Thr	Yes	UL33	HHV5wtgp038	type 3 membrane protein; 7 transmembrane domains; putative chemokine receptor; involved in intracellular signalling; GPCR family	envelope glycoprotein UL33	AAR31598.1	GI:39842054	MDTIIHNTTNRSTDTPHVNITCNITEPLSAIRTTEAVINTFIIF VGGPLNAIVLITQLLTNRVLGYSTPTIYMTNLYSTNFLTLTVLPFIVLSNQWLLPASV ASCKFLSVIYYSSCTVGFATVALIAADRYRVLHKRTYARQSYRSTYIILLLTWFAGLI FSMPAAVYTTVVIHNGTNGQSSNGHATCVLYFIADEVYTVLLSWKVLLTLVWGAAPVI MMTWFYAFFYSTVQRASQKQRSRTLTFVSVLLISFVALQTPYVSIMIFNSYATAAWPM DCEHLTLRRTIGTLSRLVPHLHCLINPILYALLGHDFLQRMRQCFRGQLLDRRAFLRS QQNQRATAETNLAAGNNSQSVATSLDTSSKNCNQHAKRSVSFNFPSGTWKGGQKTASN …
43988	SNV	C	A	0.0276341	4	6	66.6667	1	11	9.09091	AAR31598.1:p.Leu152Ile	Yes	UL33	HHV5wtgp038	type 3 membrane protein; 7 transmembrane domains; putative chemokine receptor; involved in intracellular signalling; GPCR family	envelope glycoprotein UL33	AAR31598.1	GI:39842054	MDTIIHNTTNRSTDTPHVNITCNITEPLSAIRTTEAVINTFIIF VGGPLNAIVLITQLLTNRVLGYSTPTIYMTNLYSTNFLTLTVLPFIVLSNQWLLPASV ASCKFLSVIYYSSCTVGFATVALIAADRYRVLHKRTYARQSYRSTYIILLLTWFAGLI FSMPAAVYTTVVIHNGTNGQSSNGHATCVLYFIADEVYTVLLSWKVLLTLVWGAAPVI MMTWFYAFFYSTVQRASQKQRSRTLTFVSVLLISFVALQTPYVSIMIFNSYATAAWPM DCEHLTLRRTIGTLSRLVPHLHCLINPILYALLGHDFLQRMRQCFRGQLLDRRAFLRS QQNQRATAETNLAAGNNSQSVATSLDTSSKNCNQHAKRSVSFNFPSGTWKGGQKTASN …
44000	SNV	T	C	0.0429864	5	6	83.3333	3	11	27.2727	AAR31598.1:p.Phe156Leu	Yes	UL33	HHV5wtgp038	type 3 membrane protein; 7 transmembrane domains; putative chemokine receptor; involved in intracellular signalling; GPCR family	envelope glycoprotein UL33	AAR31598.1	GI:39842054	MDTIIHNTTNRSTDTPHVNITCNITEPLSAIRTTEAVINTFIIF VGGPLNAIVLITQLLTNRVLGYSTPTIYMTNLYSTNFLTLTVLPFIVLSNQWLLPASV ASCKFLSVIYYSSCTVGFATVALIAADRYRVLHKRTYARQSYRSTYIILLLTWFAGLI FSMPAAVYTTVVIHNGTNGQSSNGHATCVLYFIADEVYTVLLSWKVLLTLVWGAAPVI MMTWFYAFFYSTVQRASQKQRSRTLTFVSVLLISFVALQTPYVSIMIFNSYATAAWPM DCEHLTLRRTIGTLSRLVPHLHCLINPILYALLGHDFLQRMRQCFRGQLLDRRAFLRS QQNQRATAETNLAAGNNSQSVATSLDTSSKNCNQHAKRSVSFNFPSGTWKGGQKTASN …
44044	SNV	A	G	0.0175339	5	6	83.3333	2	11	18.1818		No	UL33	HHV5wtgp038	type 3 membrane protein; 7 transmembrane domains; putative chemokine receptor; involved in intracellular signalling; GPCR family	envelope glycoprotein UL33	AAR31598.1	GI:39842054	MDTIIHNTTNRSTDTPHVNITCNITEPLSAIRTTEAVINTFIIF VGGPLNAIVLITQLLTNRVLGYSTPTIYMTNLYSTNFLTLTVLPFIVLSNQWLLPASV ASCKFLSVIYYSSCTVGFATVALIAADRYRVLHKRTYARQSYRSTYIILLLTWFAGLI FSMPAAVYTTVVIHNGTNGQSSNGHATCVLYFIADEVYTVLLSWKVLLTLVWGAAPVI MMTWFYAFFYSTVQRASQKQRSRTLTFVSVLLISFVALQTPYVSIMIFNSYATAAWPM DCEHLTLRRTIGTLSRLVPHLHCLINPILYALLGHDFLQRMRQCFRGQLLDRRAFLRS QQNQRATAETNLAAGNNSQSVATSLDTSSKNCNQHAKRSVSFNFPSGTWKGGQKTASN …
44050	SNV	G	A	0.0276341	4	6	66.6667	1	11	9.09091		No	UL33	HHV5wtgp038	type 3 membrane protein; 7 transmembrane domains; putative chemokine receptor; involved in intracellular signalling; GPCR family	envelope glycoprotein UL33	AAR31598.1	GI:39842054	MDTIIHNTTNRSTDTPHVNITCNITEPLSAIRTTEAVINTFIIF VGGPLNAIVLITQLLTNRVLGYSTPTIYMTNLYSTNFLTLTVLPFIVLSNQWLLPASV ASCKFLSVIYYSSCTVGFATVALIAADRYRVLHKRTYARQSYRSTYIILLLTWFAGLI FSMPAAVYTTVVIHNGTNGQSSNGHATCVLYFIADEVYTVLLSWKVLLTLVWGAAPVI MMTWFYAFFYSTVQRASQKQRSRTLTFVSVLLISFVALQTPYVSIMIFNSYATAAWPM DCEHLTLRRTIGTLSRLVPHLHCLINPILYALLGHDFLQRMRQCFRGQLLDRRAFLRS QQNQRATAETNLAAGNNSQSVATSLDTSSKNCNQHAKRSVSFNFPSGTWKGGQKTASN …
44053	SNV	A	G	0.0175339	5	6	83.3333	2	11	18.1818	AAR31598.1:p.Ile173Met	Yes	UL33	HHV5wtgp038	type 3 membrane protein; 7 transmembrane domains; putative chemokine receptor; involved in intracellular signalling; GPCR family	envelope glycoprotein UL33	AAR31598.1	GI:39842054	MDTIIHNTTNRSTDTPHVNITCNITEPLSAIRTTEAVINTFIIF VGGPLNAIVLITQLLTNRVLGYSTPTIYMTNLYSTNFLTLTVLPFIVLSNQWLLPASV ASCKFLSVIYYSSCTVGFATVALIAADRYRVLHKRTYARQSYRSTYIILLLTWFAGLI FSMPAAVYTTVVIHNGTNGQSSNGHATCVLYFIADEVYTVLLSWKVLLTLVWGAAPVI MMTWFYAFFYSTVQRASQKQRSRTLTFVSVLLISFVALQTPYVSIMIFNSYATAAWPM DCEHLTLRRTIGTLSRLVPHLHCLINPILYALLGHDFLQRMRQCFRGQLLDRRAFLRS QQNQRATAETNLAAGNNSQSVATSLDTSSKNCNQHAKRSVSFNFPSGTWKGGQKTASN …
44057	SNV	A	C	0.0175339	5	6	83.3333	2	11	18.1818	AAR31598.1:p.Asn175His	Yes	UL33	HHV5wtgp038	type 3 membrane protein; 7 transmembrane domains; putative chemokine receptor; involved in intracellular signalling; GPCR family	envelope glycoprotein UL33	AAR31598.1	GI:39842054	MDTIIHNTTNRSTDTPHVNITCNITEPLSAIRTTEAVINTFIIF VGGPLNAIVLITQLLTNRVLGYSTPTIYMTNLYSTNFLTLTVLPFIVLSNQWLLPASV ASCKFLSVIYYSSCTVGFATVALIAADRYRVLHKRTYARQSYRSTYIILLLTWFAGLI FSMPAAVYTTVVIHNGTNGQSSNGHATCVLYFIADEVYTVLLSWKVLLTLVWGAAPVI MMTWFYAFFYSTVQRASQKQRSRTLTFVSVLLISFVALQTPYVSIMIFNSYATAAWPM DCEHLTLRRTIGTLSRLVPHLHCLINPILYALLGHDFLQRMRQCFRGQLLDRRAFLRS QQNQRATAETNLAAGNNSQSVATSLDTSSKNCNQHAKRSVSFNFPSGTWKGGQKTASN …
44070	Replacement	G	AT	0.0276341	4	6	66.6667	1	11	9.09091	AAR31598.1:p.Gly179fs	Yes	UL33	HHV5wtgp038	type 3 membrane protein; 7 transmembrane domains; putative chemokine receptor; involved in intracellular signalling; GPCR family	envelope glycoprotein UL33	AAR31598.1	GI:39842054	MDTIIHNTTNRSTDTPHVNITCNITEPLSAIRTTEAVINTFIIF VGGPLNAIVLITQLLTNRVLGYSTPTIYMTNLYSTNFLTLTVLPFIVLSNQWLLPASV ASCKFLSVIYYSSCTVGFATVALIAADRYRVLHKRTYARQSYRSTYIILLLTWFAGLI FSMPAAVYTTVVIHNGTNGQSSNGHATCVLYFIADEVYTVLLSWKVLLTLVWGAAPVI MMTWFYAFFYSTVQRASQKQRSRTLTFVSVLLISFVALQTPYVSIMIFNSYATAAWPM DCEHLTLRRTIGTLSRLVPHLHCLINPILYALLGHDFLQRMRQCFRGQLLDRRAFLRS QQNQRATAETNLAAGNNSQSVATSLDTSSKNCNQHAKRSVSFNFPSGTWKGGQKTASN …
44071^44072	Insertion	-	C	0.0276341	4	6	66.6667	1	11	9.09091	AAR31598.1:p.Gln180fs	Yes	UL33	HHV5wtgp038	type 3 membrane protein; 7 transmembrane domains; putative chemokine receptor; involved in intracellular signalling; GPCR family	envelope glycoprotein UL33	AAR31598.1	GI:39842054	MDTIIHNTTNRSTDTPHVNITCNITEPLSAIRTTEAVINTFIIF VGGPLNAIVLITQLLTNRVLGYSTPTIYMTNLYSTNFLTLTVLPFIVLSNQWLLPASV ASCKFLSVIYYSSCTVGFATVALIAADRYRVLHKRTYARQSYRSTYIILLLTWFAGLI FSMPAAVYTTVVIHNGTNGQSSNGHATCVLYFIADEVYTVLLSWKVLLTLVWGAAPVI MMTWFYAFFYSTVQRASQKQRSRTLTFVSVLLISFVALQTPYVSIMIFNSYATAAWPM DCEHLTLRRTIGTLSRLVPHLHCLINPILYALLGHDFLQRMRQCFRGQLLDRRAFLRS QQNQRATAETNLAAGNNSQSVATSLDTSSKNCNQHAKRSVSFNFPSGTWKGGQKTASN …
44082	SNV	A	C	0.0276341	4	6	66.6667	1	11	9.09091	AAR31598.1:p.Asn183Thr	Yes	UL33	HHV5wtgp038	type 3 membrane protein; 7 transmembrane domains; putative chemokine receptor; involved in intracellular signalling; GPCR family	envelope glycoprotein UL33	AAR31598.1	GI:39842054	MDTIIHNTTNRSTDTPHVNITCNITEPLSAIRTTEAVINTFIIF VGGPLNAIVLITQLLTNRVLGYSTPTIYMTNLYSTNFLTLTVLPFIVLSNQWLLPASV ASCKFLSVIYYSSCTVGFATVALIAADRYRVLHKRTYARQSYRSTYIILLLTWFAGLI FSMPAAVYTTVVIHNGTNGQSSNGHATCVLYFIADEVYTVLLSWKVLLTLVWGAAPVI MMTWFYAFFYSTVQRASQKQRSRTLTFVSVLLISFVALQTPYVSIMIFNSYATAAWPM DCEHLTLRRTIGTLSRLVPHLHCLINPILYALLGHDFLQRMRQCFRGQLLDRRAFLRS QQNQRATAETNLAAGNNSQSVATSLDTSSKNCNQHAKRSVSFNFPSGTWKGGQKTASN …
44110..44111	MNV	CA	TG	0.0276341	4	6	66.6667	1	11	9.09091	AAR31598.1:p.Ile193Val	Yes	UL33	HHV5wtgp038	type 3 membrane protein; 7 transmembrane domains; putative chemokine receptor; involved in intracellular signalling; GPCR family	envelope glycoprotein UL33	AAR31598.1	GI:39842054	MDTIIHNTTNRSTDTPHVNITCNITEPLSAIRTTEAVINTFIIF VGGPLNAIVLITQLLTNRVLGYSTPTIYMTNLYSTNFLTLTVLPFIVLSNQWLLPASV ASCKFLSVIYYSSCTVGFATVALIAADRYRVLHKRTYARQSYRSTYIILLLTWFAGLI FSMPAAVYTTVVIHNGTNGQSSNGHATCVLYFIADEVYTVLLSWKVLLTLVWGAAPVI MMTWFYAFFYSTVQRASQKQRSRTLTFVSVLLISFVALQTPYVSIMIFNSYATAAWPM DCEHLTLRRTIGTLSRLVPHLHCLINPILYALLGHDFLQRMRQCFRGQLLDRRAFLRS QQNQRATAETNLAAGNNSQSVATSLDTSSKNCNQHAKRSVSFNFPSGTWKGGQKTASN …
44113	SNV	A	G	0.0276341	4	6	66.6667	1	11	9.09091	AAR31598.1:p.Ile193Met	Yes	UL33	HHV5wtgp038	type 3 membrane protein; 7 transmembrane domains; putative chemokine receptor; involved in intracellular signalling; GPCR family	envelope glycoprotein UL33	AAR31598.1	GI:39842054	MDTIIHNTTNRSTDTPHVNITCNITEPLSAIRTTEAVINTFIIF VGGPLNAIVLITQLLTNRVLGYSTPTIYMTNLYSTNFLTLTVLPFIVLSNQWLLPASV ASCKFLSVIYYSSCTVGFATVALIAADRYRVLHKRTYARQSYRSTYIILLLTWFAGLI FSMPAAVYTTVVIHNGTNGQSSNGHATCVLYFIADEVYTVLLSWKVLLTLVWGAAPVI MMTWFYAFFYSTVQRASQKQRSRTLTFVSVLLISFVALQTPYVSIMIFNSYATAAWPM DCEHLTLRRTIGTLSRLVPHLHCLINPILYALLGHDFLQRMRQCFRGQLLDRRAFLRS QQNQRATAETNLAAGNNSQSVATSLDTSSKNCNQHAKRSVSFNFPSGTWKGGQKTASN …
44149	SNV	A	G	0.0276341	4	6	66.6667	1	11	9.09091		No	UL33	HHV5wtgp038	type 3 membrane protein; 7 transmembrane domains; putative chemokine receptor; involved in intracellular signalling; GPCR family	envelope glycoprotein UL33	AAR31598.1	GI:39842054	MDTIIHNTTNRSTDTPHVNITCNITEPLSAIRTTEAVINTFIIF VGGPLNAIVLITQLLTNRVLGYSTPTIYMTNLYSTNFLTLTVLPFIVLSNQWLLPASV ASCKFLSVIYYSSCTVGFATVALIAADRYRVLHKRTYARQSYRSTYIILLLTWFAGLI FSMPAAVYTTVVIHNGTNGQSSNGHATCVLYFIADEVYTVLLSWKVLLTLVWGAAPVI MMTWFYAFFYSTVQRASQKQRSRTLTFVSVLLISFVALQTPYVSIMIFNSYATAAWPM DCEHLTLRRTIGTLSRLVPHLHCLINPILYALLGHDFLQRMRQCFRGQLLDRRAFLRS QQNQRATAETNLAAGNNSQSVATSLDTSSKNCNQHAKRSVSFNFPSGTWKGGQKTASN …
44155	SNV	G	T	0.0276341	4	6	66.6667	1	11	9.09091		No	UL33	HHV5wtgp038	type 3 membrane protein; 7 transmembrane domains; putative chemokine receptor; involved in intracellular signalling; GPCR family	envelope glycoprotein UL33	AAR31598.1	GI:39842054	MDTIIHNTTNRSTDTPHVNITCNITEPLSAIRTTEAVINTFIIF VGGPLNAIVLITQLLTNRVLGYSTPTIYMTNLYSTNFLTLTVLPFIVLSNQWLLPASV ASCKFLSVIYYSSCTVGFATVALIAADRYRVLHKRTYARQSYRSTYIILLLTWFAGLI FSMPAAVYTTVVIHNGTNGQSSNGHATCVLYFIADEVYTVLLSWKVLLTLVWGAAPVI MMTWFYAFFYSTVQRASQKQRSRTLTFVSVLLISFVALQTPYVSIMIFNSYATAAWPM DCEHLTLRRTIGTLSRLVPHLHCLINPILYALLGHDFLQRMRQCFRGQLLDRRAFLRS QQNQRATAETNLAAGNNSQSVATSLDTSSKNCNQHAKRSVSFNFPSGTWKGGQKTASN …
44164	SNV	A	G	0.0373303	6	6	100	5	11	45.4545		No	UL33	HHV5wtgp038	type 3 membrane protein; 7 transmembrane domains; putative chemokine receptor; involved in intracellular signalling; GPCR family	envelope glycoprotein UL33	AAR31598.1	GI:39842054	MDTIIHNTTNRSTDTPHVNITCNITEPLSAIRTTEAVINTFIIF VGGPLNAIVLITQLLTNRVLGYSTPTIYMTNLYSTNFLTLTVLPFIVLSNQWLLPASV ASCKFLSVIYYSSCTVGFATVALIAADRYRVLHKRTYARQSYRSTYIILLLTWFAGLI FSMPAAVYTTVVIHNGTNGQSSNGHATCVLYFIADEVYTVLLSWKVLLTLVWGAAPVI MMTWFYAFFYSTVQRASQKQRSRTLTFVSVLLISFVALQTPYVSIMIFNSYATAAWPM DCEHLTLRRTIGTLSRLVPHLHCLINPILYALLGHDFLQRMRQCFRGQLLDRRAFLRS QQNQRATAETNLAAGNNSQSVATSLDTSSKNCNQHAKRSVSFNFPSGTWKGGQKTASN …
44185	SNV	T	G	0.0373303	6	6	100	5	11	45.4545		No	UL33	HHV5wtgp038	type 3 membrane protein; 7 transmembrane domains; putative chemokine receptor; involved in intracellular signalling; GPCR family	envelope glycoprotein UL33	AAR31598.1	GI:39842054	MDTIIHNTTNRSTDTPHVNITCNITEPLSAIRTTEAVINTFIIF VGGPLNAIVLITQLLTNRVLGYSTPTIYMTNLYSTNFLTLTVLPFIVLSNQWLLPASV ASCKFLSVIYYSSCTVGFATVALIAADRYRVLHKRTYARQSYRSTYIILLLTWFAGLI FSMPAAVYTTVVIHNGTNGQSSNGHATCVLYFIADEVYTVLLSWKVLLTLVWGAAPVI MMTWFYAFFYSTVQRASQKQRSRTLTFVSVLLISFVALQTPYVSIMIFNSYATAAWPM DCEHLTLRRTIGTLSRLVPHLHCLINPILYALLGHDFLQRMRQCFRGQLLDRRAFLRS QQNQRATAETNLAAGNNSQSVATSLDTSSKNCNQHAKRSVSFNFPSGTWKGGQKTASN …
44221	SNV	A	G	0.0276341	4	6	66.6667	1	11	9.09091		No	UL33	HHV5wtgp038	type 3 membrane protein; 7 transmembrane domains; putative chemokine receptor; involved in intracellular signalling; GPCR family	envelope glycoprotein UL33	AAR31598.1	GI:39842054	MDTIIHNTTNRSTDTPHVNITCNITEPLSAIRTTEAVINTFIIF VGGPLNAIVLITQLLTNRVLGYSTPTIYMTNLYSTNFLTLTVLPFIVLSNQWLLPASV ASCKFLSVIYYSSCTVGFATVALIAADRYRVLHKRTYARQSYRSTYIILLLTWFAGLI FSMPAAVYTTVVIHNGTNGQSSNGHATCVLYFIADEVYTVLLSWKVLLTLVWGAAPVI MMTWFYAFFYSTVQRASQKQRSRTLTFVSVLLISFVALQTPYVSIMIFNSYATAAWPM DCEHLTLRRTIGTLSRLVPHLHCLINPILYALLGHDFLQRMRQCFRGQLLDRRAFLRS QQNQRATAETNLAAGNNSQSVATSLDTSSKNCNQHAKRSVSFNFPSGTWKGGQKTASN …
44230	SNV	G	A	0.0276341	4	6	66.6667	1	11	9.09091		No	UL33	HHV5wtgp038	type 3 membrane protein; 7 transmembrane domains; putative chemokine receptor; involved in intracellular signalling; GPCR family	envelope glycoprotein UL33	AAR31598.1	GI:39842054	MDTIIHNTTNRSTDTPHVNITCNITEPLSAIRTTEAVINTFIIF VGGPLNAIVLITQLLTNRVLGYSTPTIYMTNLYSTNFLTLTVLPFIVLSNQWLLPASV ASCKFLSVIYYSSCTVGFATVALIAADRYRVLHKRTYARQSYRSTYIILLLTWFAGLI FSMPAAVYTTVVIHNGTNGQSSNGHATCVLYFIADEVYTVLLSWKVLLTLVWGAAPVI MMTWFYAFFYSTVQRASQKQRSRTLTFVSVLLISFVALQTPYVSIMIFNSYATAAWPM DCEHLTLRRTIGTLSRLVPHLHCLINPILYALLGHDFLQRMRQCFRGQLLDRRAFLRS QQNQRATAETNLAAGNNSQSVATSLDTSSKNCNQHAKRSVSFNFPSGTWKGGQKTASN …
44233..44234	MNV	TG	CA	0.0373303	6	6	100	5	11	45.4545	AAR31598.1:p.Ala234Thr	Yes	UL33	HHV5wtgp038	type 3 membrane protein; 7 transmembrane domains; putative chemokine receptor; involved in intracellular signalling; GPCR family	envelope glycoprotein UL33	AAR31598.1	GI:39842054	MDTIIHNTTNRSTDTPHVNITCNITEPLSAIRTTEAVINTFIIF VGGPLNAIVLITQLLTNRVLGYSTPTIYMTNLYSTNFLTLTVLPFIVLSNQWLLPASV ASCKFLSVIYYSSCTVGFATVALIAADRYRVLHKRTYARQSYRSTYIILLLTWFAGLI FSMPAAVYTTVVIHNGTNGQSSNGHATCVLYFIADEVYTVLLSWKVLLTLVWGAAPVI MMTWFYAFFYSTVQRASQKQRSRTLTFVSVLLISFVALQTPYVSIMIFNSYATAAWPM DCEHLTLRRTIGTLSRLVPHLHCLINPILYALLGHDFLQRMRQCFRGQLLDRRAFLRS QQNQRATAETNLAAGNNSQSVATSLDTSSKNCNQHAKRSVSFNFPSGTWKGGQKTASN …
44239	SNV	T	A	0.0373303	6	6	100	5	11	45.4545		No	UL33	HHV5wtgp038	type 3 membrane protein; 7 transmembrane domains; putative chemokine receptor; involved in intracellular signalling; GPCR family	envelope glycoprotein UL33	AAR31598.1	GI:39842054	MDTIIHNTTNRSTDTPHVNITCNITEPLSAIRTTEAVINTFIIF VGGPLNAIVLITQLLTNRVLGYSTPTIYMTNLYSTNFLTLTVLPFIVLSNQWLLPASV ASCKFLSVIYYSSCTVGFATVALIAADRYRVLHKRTYARQSYRSTYIILLLTWFAGLI FSMPAAVYTTVVIHNGTNGQSSNGHATCVLYFIADEVYTVLLSWKVLLTLVWGAAPVI MMTWFYAFFYSTVQRASQKQRSRTLTFVSVLLISFVALQTPYVSIMIFNSYATAAWPM DCEHLTLRRTIGTLSRLVPHLHCLINPILYALLGHDFLQRMRQCFRGQLLDRRAFLRS QQNQRATAETNLAAGNNSQSVATSLDTSSKNCNQHAKRSVSFNFPSGTWKGGQKTASN …
44260	SNV	T	C	0.0373303	6	6	100	5	11	45.4545		No	UL33	HHV5wtgp038	type 3 membrane protein; 7 transmembrane domains; putative chemokine receptor; involved in intracellular signalling; GPCR family	envelope glycoprotein UL33	AAR31598.1	GI:39842054	MDTIIHNTTNRSTDTPHVNITCNITEPLSAIRTTEAVINTFIIF VGGPLNAIVLITQLLTNRVLGYSTPTIYMTNLYSTNFLTLTVLPFIVLSNQWLLPASV ASCKFLSVIYYSSCTVGFATVALIAADRYRVLHKRTYARQSYRSTYIILLLTWFAGLI FSMPAAVYTTVVIHNGTNGQSSNGHATCVLYFIADEVYTVLLSWKVLLTLVWGAAPVI MMTWFYAFFYSTVQRASQKQRSRTLTFVSVLLISFVALQTPYVSIMIFNSYATAAWPM DCEHLTLRRTIGTLSRLVPHLHCLINPILYALLGHDFLQRMRQCFRGQLLDRRAFLRS QQNQRATAETNLAAGNNSQSVATSLDTSSKNCNQHAKRSVSFNFPSGTWKGGQKTASN …
44266	SNV	C	T	0.0276341	4	6	66.6667	1	11	9.09091		No	UL33	HHV5wtgp038	type 3 membrane protein; 7 transmembrane domains; putative chemokine receptor; involved in intracellular signalling; GPCR family	envelope glycoprotein UL33	AAR31598.1	GI:39842054	MDTIIHNTTNRSTDTPHVNITCNITEPLSAIRTTEAVINTFIIF VGGPLNAIVLITQLLTNRVLGYSTPTIYMTNLYSTNFLTLTVLPFIVLSNQWLLPASV ASCKFLSVIYYSSCTVGFATVALIAADRYRVLHKRTYARQSYRSTYIILLLTWFAGLI FSMPAAVYTTVVIHNGTNGQSSNGHATCVLYFIADEVYTVLLSWKVLLTLVWGAAPVI MMTWFYAFFYSTVQRASQKQRSRTLTFVSVLLISFVALQTPYVSIMIFNSYATAAWPM DCEHLTLRRTIGTLSRLVPHLHCLINPILYALLGHDFLQRMRQCFRGQLLDRRAFLRS QQNQRATAETNLAAGNNSQSVATSLDTSSKNCNQHAKRSVSFNFPSGTWKGGQKTASN …
44269	SNV	C	T	0.0373303	6	6	100	5	11	45.4545		No	UL33	HHV5wtgp038	type 3 membrane protein; 7 transmembrane domains; putative chemokine receptor; involved in intracellular signalling; GPCR family	envelope glycoprotein UL33	AAR31598.1	GI:39842054	MDTIIHNTTNRSTDTPHVNITCNITEPLSAIRTTEAVINTFIIF VGGPLNAIVLITQLLTNRVLGYSTPTIYMTNLYSTNFLTLTVLPFIVLSNQWLLPASV ASCKFLSVIYYSSCTVGFATVALIAADRYRVLHKRTYARQSYRSTYIILLLTWFAGLI FSMPAAVYTTVVIHNGTNGQSSNGHATCVLYFIADEVYTVLLSWKVLLTLVWGAAPVI MMTWFYAFFYSTVQRASQKQRSRTLTFVSVLLISFVALQTPYVSIMIFNSYATAAWPM DCEHLTLRRTIGTLSRLVPHLHCLINPILYALLGHDFLQRMRQCFRGQLLDRRAFLRS QQNQRATAETNLAAGNNSQSVATSLDTSSKNCNQHAKRSVSFNFPSGTWKGGQKTASN …
44281	SNV	A	G	0.0276341	4	6	66.6667	1	11	9.09091		No	UL33	HHV5wtgp038	type 3 membrane protein; 7 transmembrane domains; putative chemokine receptor; involved in intracellular signalling; GPCR family	envelope glycoprotein UL33	AAR31598.1	GI:39842054	MDTIIHNTTNRSTDTPHVNITCNITEPLSAIRTTEAVINTFIIF VGGPLNAIVLITQLLTNRVLGYSTPTIYMTNLYSTNFLTLTVLPFIVLSNQWLLPASV ASCKFLSVIYYSSCTVGFATVALIAADRYRVLHKRTYARQSYRSTYIILLLTWFAGLI FSMPAAVYTTVVIHNGTNGQSSNGHATCVLYFIADEVYTVLLSWKVLLTLVWGAAPVI MMTWFYAFFYSTVQRASQKQRSRTLTFVSVLLISFVALQTPYVSIMIFNSYATAAWPM DCEHLTLRRTIGTLSRLVPHLHCLINPILYALLGHDFLQRMRQCFRGQLLDRRAFLRS QQNQRATAETNLAAGNNSQSVATSLDTSSKNCNQHAKRSVSFNFPSGTWKGGQKTASN …
44308	SNV	G	A	0.0276341	4	6	66.6667	1	11	9.09091		No	UL33	HHV5wtgp038	type 3 membrane protein; 7 transmembrane domains; putative chemokine receptor; involved in intracellular signalling; GPCR family	envelope glycoprotein UL33	AAR31598.1	GI:39842054	MDTIIHNTTNRSTDTPHVNITCNITEPLSAIRTTEAVINTFIIF VGGPLNAIVLITQLLTNRVLGYSTPTIYMTNLYSTNFLTLTVLPFIVLSNQWLLPASV ASCKFLSVIYYSSCTVGFATVALIAADRYRVLHKRTYARQSYRSTYIILLLTWFAGLI FSMPAAVYTTVVIHNGTNGQSSNGHATCVLYFIADEVYTVLLSWKVLLTLVWGAAPVI MMTWFYAFFYSTVQRASQKQRSRTLTFVSVLLISFVALQTPYVSIMIFNSYATAAWPM DCEHLTLRRTIGTLSRLVPHLHCLINPILYALLGHDFLQRMRQCFRGQLLDRRAFLRS QQNQRATAETNLAAGNNSQSVATSLDTSSKNCNQHAKRSVSFNFPSGTWKGGQKTASN …
44315	SNV	G	A	0.0276341	4	6	66.6667	1	11	9.09091	AAR31598.1:p.Val261Met	Yes	UL33	HHV5wtgp038	type 3 membrane protein; 7 transmembrane domains; putative chemokine receptor; involved in intracellular signalling; GPCR family	envelope glycoprotein UL33	AAR31598.1	GI:39842054	MDTIIHNTTNRSTDTPHVNITCNITEPLSAIRTTEAVINTFIIF VGGPLNAIVLITQLLTNRVLGYSTPTIYMTNLYSTNFLTLTVLPFIVLSNQWLLPASV ASCKFLSVIYYSSCTVGFATVALIAADRYRVLHKRTYARQSYRSTYIILLLTWFAGLI FSMPAAVYTTVVIHNGTNGQSSNGHATCVLYFIADEVYTVLLSWKVLLTLVWGAAPVI MMTWFYAFFYSTVQRASQKQRSRTLTFVSVLLISFVALQTPYVSIMIFNSYATAAWPM DCEHLTLRRTIGTLSRLVPHLHCLINPILYALLGHDFLQRMRQCFRGQLLDRRAFLRS QQNQRATAETNLAAGNNSQSVATSLDTSSKNCNQHAKRSVSFNFPSGTWKGGQKTASN …
44317	SNV	G	C	0.0373303	6	6	100	5	11	45.4545		No	UL33	HHV5wtgp038	type 3 membrane protein; 7 transmembrane domains; putative chemokine receptor; involved in intracellular signalling; GPCR family	envelope glycoprotein UL33	AAR31598.1	GI:39842054	MDTIIHNTTNRSTDTPHVNITCNITEPLSAIRTTEAVINTFIIF VGGPLNAIVLITQLLTNRVLGYSTPTIYMTNLYSTNFLTLTVLPFIVLSNQWLLPASV ASCKFLSVIYYSSCTVGFATVALIAADRYRVLHKRTYARQSYRSTYIILLLTWFAGLI FSMPAAVYTTVVIHNGTNGQSSNGHATCVLYFIADEVYTVLLSWKVLLTLVWGAAPVI MMTWFYAFFYSTVQRASQKQRSRTLTFVSVLLISFVALQTPYVSIMIFNSYATAAWPM DCEHLTLRRTIGTLSRLVPHLHCLINPILYALLGHDFLQRMRQCFRGQLLDRRAFLRS QQNQRATAETNLAAGNNSQSVATSLDTSSKNCNQHAKRSVSFNFPSGTWKGGQKTASN …
44320..44321	MNV	CA	TC	0.0373303	6	6	100	5	11	45.4545	AAR31598.1:p.Ile263Leu	Yes	UL33	HHV5wtgp038	type 3 membrane protein; 7 transmembrane domains; putative chemokine receptor; involved in intracellular signalling; GPCR family	envelope glycoprotein UL33	AAR31598.1	GI:39842054	MDTIIHNTTNRSTDTPHVNITCNITEPLSAIRTTEAVINTFIIF VGGPLNAIVLITQLLTNRVLGYSTPTIYMTNLYSTNFLTLTVLPFIVLSNQWLLPASV ASCKFLSVIYYSSCTVGFATVALIAADRYRVLHKRTYARQSYRSTYIILLLTWFAGLI FSMPAAVYTTVVIHNGTNGQSSNGHATCVLYFIADEVYTVLLSWKVLLTLVWGAAPVI MMTWFYAFFYSTVQRASQKQRSRTLTFVSVLLISFVALQTPYVSIMIFNSYATAAWPM DCEHLTLRRTIGTLSRLVPHLHCLINPILYALLGHDFLQRMRQCFRGQLLDRRAFLRS QQNQRATAETNLAAGNNSQSVATSLDTSSKNCNQHAKRSVSFNFPSGTWKGGQKTASN …
44329	SNV	T	C	0.0373303	6	6	100	5	11	45.4545		No	UL33	HHV5wtgp038	type 3 membrane protein; 7 transmembrane domains; putative chemokine receptor; involved in intracellular signalling; GPCR family	envelope glycoprotein UL33	AAR31598.1	GI:39842054	MDTIIHNTTNRSTDTPHVNITCNITEPLSAIRTTEAVINTFIIF VGGPLNAIVLITQLLTNRVLGYSTPTIYMTNLYSTNFLTLTVLPFIVLSNQWLLPASV ASCKFLSVIYYSSCTVGFATVALIAADRYRVLHKRTYARQSYRSTYIILLLTWFAGLI FSMPAAVYTTVVIHNGTNGQSSNGHATCVLYFIADEVYTVLLSWKVLLTLVWGAAPVI MMTWFYAFFYSTVQRASQKQRSRTLTFVSVLLISFVALQTPYVSIMIFNSYATAAWPM DCEHLTLRRTIGTLSRLVPHLHCLINPILYALLGHDFLQRMRQCFRGQLLDRRAFLRS QQNQRATAETNLAAGNNSQSVATSLDTSSKNCNQHAKRSVSFNFPSGTWKGGQKTASN …
44347	SNV	G	A	0.0373303	6	6	100	5	11	45.4545		No	UL33	HHV5wtgp038	type 3 membrane protein; 7 transmembrane domains; putative chemokine receptor; involved in intracellular signalling; GPCR family	envelope glycoprotein UL33	AAR31598.1	GI:39842054	MDTIIHNTTNRSTDTPHVNITCNITEPLSAIRTTEAVINTFIIF VGGPLNAIVLITQLLTNRVLGYSTPTIYMTNLYSTNFLTLTVLPFIVLSNQWLLPASV ASCKFLSVIYYSSCTVGFATVALIAADRYRVLHKRTYARQSYRSTYIILLLTWFAGLI FSMPAAVYTTVVIHNGTNGQSSNGHATCVLYFIADEVYTVLLSWKVLLTLVWGAAPVI MMTWFYAFFYSTVQRASQKQRSRTLTFVSVLLISFVALQTPYVSIMIFNSYATAAWPM DCEHLTLRRTIGTLSRLVPHLHCLINPILYALLGHDFLQRMRQCFRGQLLDRRAFLRS QQNQRATAETNLAAGNNSQSVATSLDTSSKNCNQHAKRSVSFNFPSGTWKGGQKTASN …
44353	SNV	A	C	0.0373303	6	6	100	5	11	45.4545		No	UL33	HHV5wtgp038	type 3 membrane protein; 7 transmembrane domains; putative chemokine receptor; involved in intracellular signalling; GPCR family	envelope glycoprotein UL33	AAR31598.1	GI:39842054	MDTIIHNTTNRSTDTPHVNITCNITEPLSAIRTTEAVINTFIIF VGGPLNAIVLITQLLTNRVLGYSTPTIYMTNLYSTNFLTLTVLPFIVLSNQWLLPASV ASCKFLSVIYYSSCTVGFATVALIAADRYRVLHKRTYARQSYRSTYIILLLTWFAGLI FSMPAAVYTTVVIHNGTNGQSSNGHATCVLYFIADEVYTVLLSWKVLLTLVWGAAPVI MMTWFYAFFYSTVQRASQKQRSRTLTFVSVLLISFVALQTPYVSIMIFNSYATAAWPM DCEHLTLRRTIGTLSRLVPHLHCLINPILYALLGHDFLQRMRQCFRGQLLDRRAFLRS QQNQRATAETNLAAGNNSQSVATSLDTSSKNCNQHAKRSVSFNFPSGTWKGGQKTASN …
44357	SNV	C	T	0.0276341	4	6	66.6667	1	11	9.09091	AAR31598.1:p.Pro275Ser	Yes	UL33	HHV5wtgp038	type 3 membrane protein; 7 transmembrane domains; putative chemokine receptor; involved in intracellular signalling; GPCR family	envelope glycoprotein UL33	AAR31598.1	GI:39842054	MDTIIHNTTNRSTDTPHVNITCNITEPLSAIRTTEAVINTFIIF VGGPLNAIVLITQLLTNRVLGYSTPTIYMTNLYSTNFLTLTVLPFIVLSNQWLLPASV ASCKFLSVIYYSSCTVGFATVALIAADRYRVLHKRTYARQSYRSTYIILLLTWFAGLI FSMPAAVYTTVVIHNGTNGQSSNGHATCVLYFIADEVYTVLLSWKVLLTLVWGAAPVI MMTWFYAFFYSTVQRASQKQRSRTLTFVSVLLISFVALQTPYVSIMIFNSYATAAWPM DCEHLTLRRTIGTLSRLVPHLHCLINPILYALLGHDFLQRMRQCFRGQLLDRRAFLRS QQNQRATAETNLAAGNNSQSVATSLDTSSKNCNQHAKRSVSFNFPSGTWKGGQKTASN …
44361	SNV	T	C	0.0276341	4	6	66.6667	1	11	9.09091	AAR31598.1:p.Met276Thr	Yes	UL33	HHV5wtgp038	type 3 membrane protein; 7 transmembrane domains; putative chemokine receptor; involved in intracellular signalling; GPCR family	envelope glycoprotein UL33	AAR31598.1	GI:39842054	MDTIIHNTTNRSTDTPHVNITCNITEPLSAIRTTEAVINTFIIF VGGPLNAIVLITQLLTNRVLGYSTPTIYMTNLYSTNFLTLTVLPFIVLSNQWLLPASV ASCKFLSVIYYSSCTVGFATVALIAADRYRVLHKRTYARQSYRSTYIILLLTWFAGLI FSMPAAVYTTVVIHNGTNGQSSNGHATCVLYFIADEVYTVLLSWKVLLTLVWGAAPVI MMTWFYAFFYSTVQRASQKQRSRTLTFVSVLLISFVALQTPYVSIMIFNSYATAAWPM DCEHLTLRRTIGTLSRLVPHLHCLINPILYALLGHDFLQRMRQCFRGQLLDRRAFLRS QQNQRATAETNLAAGNNSQSVATSLDTSSKNCNQHAKRSVSFNFPSGTWKGGQKTASN …
44365	SNV	C	A	0.0276341	4	6	66.6667	1	11	9.09091	AAR31598.1:p.Asp277Glu	Yes	UL33	HHV5wtgp038	type 3 membrane protein; 7 transmembrane domains; putative chemokine receptor; involved in intracellular signalling; GPCR family	envelope glycoprotein UL33	AAR31598.1	GI:39842054	MDTIIHNTTNRSTDTPHVNITCNITEPLSAIRTTEAVINTFIIF VGGPLNAIVLITQLLTNRVLGYSTPTIYMTNLYSTNFLTLTVLPFIVLSNQWLLPASV ASCKFLSVIYYSSCTVGFATVALIAADRYRVLHKRTYARQSYRSTYIILLLTWFAGLI FSMPAAVYTTVVIHNGTNGQSSNGHATCVLYFIADEVYTVLLSWKVLLTLVWGAAPVI MMTWFYAFFYSTVQRASQKQRSRTLTFVSVLLISFVALQTPYVSIMIFNSYATAAWPM DCEHLTLRRTIGTLSRLVPHLHCLINPILYALLGHDFLQRMRQCFRGQLLDRRAFLRS QQNQRATAETNLAAGNNSQSVATSLDTSSKNCNQHAKRSVSFNFPSGTWKGGQKTASN …
44368	SNV	C	T	0.0373303	6	6	100	5	11	45.4545		No	UL33	HHV5wtgp038	type 3 membrane protein; 7 transmembrane domains; putative chemokine receptor; involved in intracellular signalling; GPCR family	envelope glycoprotein UL33	AAR31598.1	GI:39842054	MDTIIHNTTNRSTDTPHVNITCNITEPLSAIRTTEAVINTFIIF VGGPLNAIVLITQLLTNRVLGYSTPTIYMTNLYSTNFLTLTVLPFIVLSNQWLLPASV ASCKFLSVIYYSSCTVGFATVALIAADRYRVLHKRTYARQSYRSTYIILLLTWFAGLI FSMPAAVYTTVVIHNGTNGQSSNGHATCVLYFIADEVYTVLLSWKVLLTLVWGAAPVI MMTWFYAFFYSTVQRASQKQRSRTLTFVSVLLISFVALQTPYVSIMIFNSYATAAWPM DCEHLTLRRTIGTLSRLVPHLHCLINPILYALLGHDFLQRMRQCFRGQLLDRRAFLRS QQNQRATAETNLAAGNNSQSVATSLDTSSKNCNQHAKRSVSFNFPSGTWKGGQKTASN …
44377	SNV	G	C	0.0373303	6	6	100	5	11	45.4545		No	UL33	HHV5wtgp038	type 3 membrane protein; 7 transmembrane domains; putative chemokine receptor; involved in intracellular signalling; GPCR family	envelope glycoprotein UL33	AAR31598.1	GI:39842054	MDTIIHNTTNRSTDTPHVNITCNITEPLSAIRTTEAVINTFIIF VGGPLNAIVLITQLLTNRVLGYSTPTIYMTNLYSTNFLTLTVLPFIVLSNQWLLPASV ASCKFLSVIYYSSCTVGFATVALIAADRYRVLHKRTYARQSYRSTYIILLLTWFAGLI FSMPAAVYTTVVIHNGTNGQSSNGHATCVLYFIADEVYTVLLSWKVLLTLVWGAAPVI MMTWFYAFFYSTVQRASQKQRSRTLTFVSVLLISFVALQTPYVSIMIFNSYATAAWPM DCEHLTLRRTIGTLSRLVPHLHCLINPILYALLGHDFLQRMRQCFRGQLLDRRAFLRS QQNQRATAETNLAAGNNSQSVATSLDTSSKNCNQHAKRSVSFNFPSGTWKGGQKTASN …
44405	SNV	T	G	0.0373303	6	6	100	5	11	45.4545	AAR31598.1:p.Ser291Ala	Yes	UL33	HHV5wtgp038	type 3 membrane protein; 7 transmembrane domains; putative chemokine receptor; involved in intracellular signalling; GPCR family	envelope glycoprotein UL33	AAR31598.1	GI:39842054	MDTIIHNTTNRSTDTPHVNITCNITEPLSAIRTTEAVINTFIIF VGGPLNAIVLITQLLTNRVLGYSTPTIYMTNLYSTNFLTLTVLPFIVLSNQWLLPASV ASCKFLSVIYYSSCTVGFATVALIAADRYRVLHKRTYARQSYRSTYIILLLTWFAGLI FSMPAAVYTTVVIHNGTNGQSSNGHATCVLYFIADEVYTVLLSWKVLLTLVWGAAPVI MMTWFYAFFYSTVQRASQKQRSRTLTFVSVLLISFVALQTPYVSIMIFNSYATAAWPM DCEHLTLRRTIGTLSRLVPHLHCLINPILYALLGHDFLQRMRQCFRGQLLDRRAFLRS QQNQRATAETNLAAGNNSQSVATSLDTSSKNCNQHAKRSVSFNFPSGTWKGGQKTASN …
44416	SNV	A	T	0.0276341	4	6	66.6667	1	11	9.09091		No	UL33	HHV5wtgp038	type 3 membrane protein; 7 transmembrane domains; putative chemokine receptor; involved in intracellular signalling; GPCR family	envelope glycoprotein UL33	AAR31598.1	GI:39842054	MDTIIHNTTNRSTDTPHVNITCNITEPLSAIRTTEAVINTFIIF VGGPLNAIVLITQLLTNRVLGYSTPTIYMTNLYSTNFLTLTVLPFIVLSNQWLLPASV ASCKFLSVIYYSSCTVGFATVALIAADRYRVLHKRTYARQSYRSTYIILLLTWFAGLI FSMPAAVYTTVVIHNGTNGQSSNGHATCVLYFIADEVYTVLLSWKVLLTLVWGAAPVI MMTWFYAFFYSTVQRASQKQRSRTLTFVSVLLISFVALQTPYVSIMIFNSYATAAWPM DCEHLTLRRTIGTLSRLVPHLHCLINPILYALLGHDFLQRMRQCFRGQLLDRRAFLRS QQNQRATAETNLAAGNNSQSVATSLDTSSKNCNQHAKRSVSFNFPSGTWKGGQKTASN …
44422..44423	MNV	CC	TT	0.0276341	4	6	66.6667	1	11	9.09091		No	UL33	HHV5wtgp038	type 3 membrane protein; 7 transmembrane domains; putative chemokine receptor; involved in intracellular signalling; GPCR family	envelope glycoprotein UL33	AAR31598.1	GI:39842054	MDTIIHNTTNRSTDTPHVNITCNITEPLSAIRTTEAVINTFIIF VGGPLNAIVLITQLLTNRVLGYSTPTIYMTNLYSTNFLTLTVLPFIVLSNQWLLPASV ASCKFLSVIYYSSCTVGFATVALIAADRYRVLHKRTYARQSYRSTYIILLLTWFAGLI FSMPAAVYTTVVIHNGTNGQSSNGHATCVLYFIADEVYTVLLSWKVLLTLVWGAAPVI MMTWFYAFFYSTVQRASQKQRSRTLTFVSVLLISFVALQTPYVSIMIFNSYATAAWPM DCEHLTLRRTIGTLSRLVPHLHCLINPILYALLGHDFLQRMRQCFRGQLLDRRAFLRS QQNQRATAETNLAAGNNSQSVATSLDTSSKNCNQHAKRSVSFNFPSGTWKGGQKTASN …
44425	SNV	A	G	0.0276341	4	6	66.6667	1	11	9.09091		No	UL33	HHV5wtgp038	type 3 membrane protein; 7 transmembrane domains; putative chemokine receptor; involved in intracellular signalling; GPCR family	envelope glycoprotein UL33	AAR31598.1	GI:39842054	MDTIIHNTTNRSTDTPHVNITCNITEPLSAIRTTEAVINTFIIF VGGPLNAIVLITQLLTNRVLGYSTPTIYMTNLYSTNFLTLTVLPFIVLSNQWLLPASV ASCKFLSVIYYSSCTVGFATVALIAADRYRVLHKRTYARQSYRSTYIILLLTWFAGLI FSMPAAVYTTVVIHNGTNGQSSNGHATCVLYFIADEVYTVLLSWKVLLTLVWGAAPVI MMTWFYAFFYSTVQRASQKQRSRTLTFVSVLLISFVALQTPYVSIMIFNSYATAAWPM DCEHLTLRRTIGTLSRLVPHLHCLINPILYALLGHDFLQRMRQCFRGQLLDRRAFLRS QQNQRATAETNLAAGNNSQSVATSLDTSSKNCNQHAKRSVSFNFPSGTWKGGQKTASN …
44437	SNV	C	T	0.0373303	6	6	100	5	11	45.4545		No	UL33	HHV5wtgp038	type 3 membrane protein; 7 transmembrane domains; putative chemokine receptor; involved in intracellular signalling; GPCR family	envelope glycoprotein UL33	AAR31598.1	GI:39842054	MDTIIHNTTNRSTDTPHVNITCNITEPLSAIRTTEAVINTFIIF VGGPLNAIVLITQLLTNRVLGYSTPTIYMTNLYSTNFLTLTVLPFIVLSNQWLLPASV ASCKFLSVIYYSSCTVGFATVALIAADRYRVLHKRTYARQSYRSTYIILLLTWFAGLI FSMPAAVYTTVVIHNGTNGQSSNGHATCVLYFIADEVYTVLLSWKVLLTLVWGAAPVI MMTWFYAFFYSTVQRASQKQRSRTLTFVSVLLISFVALQTPYVSIMIFNSYATAAWPM DCEHLTLRRTIGTLSRLVPHLHCLINPILYALLGHDFLQRMRQCFRGQLLDRRAFLRS QQNQRATAETNLAAGNNSQSVATSLDTSSKNCNQHAKRSVSFNFPSGTWKGGQKTASN …
44446	SNV	T	C	0.0373303	6	6	100	5	11	45.4545		No	UL33	HHV5wtgp038	type 3 membrane protein; 7 transmembrane domains; putative chemokine receptor; involved in intracellular signalling; GPCR family	envelope glycoprotein UL33	AAR31598.1	GI:39842054	MDTIIHNTTNRSTDTPHVNITCNITEPLSAIRTTEAVINTFIIF VGGPLNAIVLITQLLTNRVLGYSTPTIYMTNLYSTNFLTLTVLPFIVLSNQWLLPASV ASCKFLSVIYYSSCTVGFATVALIAADRYRVLHKRTYARQSYRSTYIILLLTWFAGLI FSMPAAVYTTVVIHNGTNGQSSNGHATCVLYFIADEVYTVLLSWKVLLTLVWGAAPVI MMTWFYAFFYSTVQRASQKQRSRTLTFVSVLLISFVALQTPYVSIMIFNSYATAAWPM DCEHLTLRRTIGTLSRLVPHLHCLINPILYALLGHDFLQRMRQCFRGQLLDRRAFLRS QQNQRATAETNLAAGNNSQSVATSLDTSSKNCNQHAKRSVSFNFPSGTWKGGQKTASN …
44455	SNV	G	A	0.0276341	4	6	66.6667	1	11	9.09091		No	UL33	HHV5wtgp038	type 3 membrane protein; 7 transmembrane domains; putative chemokine receptor; involved in intracellular signalling; GPCR family	envelope glycoprotein UL33	AAR31598.1	GI:39842054	MDTIIHNTTNRSTDTPHVNITCNITEPLSAIRTTEAVINTFIIF VGGPLNAIVLITQLLTNRVLGYSTPTIYMTNLYSTNFLTLTVLPFIVLSNQWLLPASV ASCKFLSVIYYSSCTVGFATVALIAADRYRVLHKRTYARQSYRSTYIILLLTWFAGLI FSMPAAVYTTVVIHNGTNGQSSNGHATCVLYFIADEVYTVLLSWKVLLTLVWGAAPVI MMTWFYAFFYSTVQRASQKQRSRTLTFVSVLLISFVALQTPYVSIMIFNSYATAAWPM DCEHLTLRRTIGTLSRLVPHLHCLINPILYALLGHDFLQRMRQCFRGQLLDRRAFLRS QQNQRATAETNLAAGNNSQSVATSLDTSSKNCNQHAKRSVSFNFPSGTWKGGQKTASN …
46850	SNV	T	C	0.0373303	6	6	100	5	11	45.4545		No	UL35	HHV5wtgp040	UL25 family	tegument protein UL35	AAR31600.1	GI:39842056	MAQGSRAPSGPPLPVLPVDDWLNFRVDLFGDEHRRLLLEMLTQG CSNFVGLLNFGVPSPVYALEALVDFQVRNAFMKVKPVAQEIIRICILANHYRNSRDVL RDLRTQLDVLYSEPLKTRLLRGLIRLCRAAQTGVKPEDISVHLGADDVTFGVLKRALV RLHRVRDALGLRASPEAEARYPRLTTYNLLFHPPPFTTVEAVDLCAENLSDVTQRRNR PLRCLTSIKRPGSRTLEDALNDMYLLLTLRHLQLRHALELQMMQDWVVERCNRLCDAL YFCYTQAPETRQTFVTLVRGLELARQHSSPAFQPMLYNLLQLLTQLHEANVYLCPGYL HFSAYKLLKKIQSVSDARERGEFGDEDEEQENDGEPREAQLDLEADPTAREGELFFFS …
48152	SNV	G	A	0.0294118	3	6	50	0	11	0		No	UL35	HHV5wtgp040	UL25 family	tegument protein UL35	AAR31600.1	GI:39842056	MAQGSRAPSGPPLPVLPVDDWLNFRVDLFGDEHRRLLLEMLTQG CSNFVGLLNFGVPSPVYALEALVDFQVRNAFMKVKPVAQEIIRICILANHYRNSRDVL RDLRTQLDVLYSEPLKTRLLRGLIRLCRAAQTGVKPEDISVHLGADDVTFGVLKRALV RLHRVRDALGLRASPEAEARYPRLTTYNLLFHPPPFTTVEAVDLCAENLSDVTQRRNR PLRCLTSIKRPGSRTLEDALNDMYLLLTLRHLQLRHALELQMMQDWVVERCNRLCDAL YFCYTQAPETRQTFVTLVRGLELARQHSSPAFQPMLYNLLQLLTQLHEANVYLCPGYL HFSAYKLLKKIQSVSDARERGEFGDEDEEQENDGEPREAQLDLEADPTAREGELFFFS …
73888..73890	Deletion	GAG	-	0.0054137	5	6	83.3333	1	11	9.09091	AAR31616.1:p.Pro222del	Yes	UL50	HHV5wtgp055	type 2 membrane protein; interacts with nuclear egress lamina protein; involved in nuclear egress	nuclear egress membrane protein	AAR31616.1	GI:39842072	MEMNKVLHQDLVQATRRILKLGPSELRVTDAGLICKNPNYSVCD AMLKTDTVYCVEYLLSYWESRTDHVPCFIFKNTGCAVSLCCFVRAPVKLVSPARHVGE FNVLKVNESLIVTLKDIEEIKPSAYGVLTKCVVRKSNSASVFNIELIAFGPENEGEYE NLLRELYAKKAASTSLAVRNHVTVSSHSGSGPSLWRARMSAALTRTAGKRSPRTASPP PPPPRHPSCSPTMVAAGGAAAGPRPPPPPMAAGSWRLCRCEACMGRCGCASEGDADEE EEELLALAGEGKAAAAAAGQDIGGSARRPLEEHVSRRRGVSTHHRHPPSPPCTPSLER TGYRWAPSSWWRARSGPSRPQSGPWLPARFATLGPLVLALLLVLALLWRGHGQSSSPT …
84328	SNV	A	G	0.0276341	4	6	66.6667	1	11	9.09091		No	UL55	HHV5wtgp060	type 1 membrane protein; possible membrane fusogen; binds cell surface heparan sulphate; involved in cell entry; involved in cell-to-cell spread	envelope glycoprotein B	AAR31620.1	GI:39842076	MESRIWCLVVCVNLCIVCLGAAVSSSSTRGTSATHSHHSSHTTS AAHSRSGSVSQRVTSSQTVSHGVNETIYNTTLKYGDVVGVNTTKYPYRVCSMAQGTDL IRFERNIVCTSMKPINEDLDEGIMVVYKRNIVAHTFKVRVYQKVLTFRRSYAYIHTTY LLGSNTEYVAPPMWEIHHINSHSQCYSSYSRVIAGTVFVAYHRDSYENKTMQLMPDDY SNTHSTRYVTVKDQWHSRGSTWLYRETCNLNCMVTITTARSKYPYHFFATSTGDVVDI SPFYNGTNRNASYFGENADKFFIFPNYTIVSDFGRPNSALETHRLVAFLERADSVISW DIQDEKNVTCQLTFWEASERTIRSEAEDSYHFSSAKMTATFLSKKQEVNMSDSALDCV …
84466	SNV	A	G	0.0276341	4	6	66.6667	1	11	9.09091		No	UL55	HHV5wtgp060	type 1 membrane protein; possible membrane fusogen; binds cell surface heparan sulphate; involved in cell entry; involved in cell-to-cell spread	envelope glycoprotein B	AAR31620.1	GI:39842076	MESRIWCLVVCVNLCIVCLGAAVSSSSTRGTSATHSHHSSHTTS AAHSRSGSVSQRVTSSQTVSHGVNETIYNTTLKYGDVVGVNTTKYPYRVCSMAQGTDL IRFERNIVCTSMKPINEDLDEGIMVVYKRNIVAHTFKVRVYQKVLTFRRSYAYIHTTY LLGSNTEYVAPPMWEIHHINSHSQCYSSYSRVIAGTVFVAYHRDSYENKTMQLMPDDY SNTHSTRYVTVKDQWHSRGSTWLYRETCNLNCMVTITTARSKYPYHFFATSTGDVVDI SPFYNGTNRNASYFGENADKFFIFPNYTIVSDFGRPNSALETHRLVAFLERADSVISW DIQDEKNVTCQLTFWEASERTIRSEAEDSYHFSSAKMTATFLSKKQEVNMSDSALDCV …
84469	SNV	A	G	0.0276341	4	6	66.6667	1	11	9.09091		No	UL55	HHV5wtgp060	type 1 membrane protein; possible membrane fusogen; binds cell surface heparan sulphate; involved in cell entry; involved in cell-to-cell spread	envelope glycoprotein B	AAR31620.1	GI:39842076	MESRIWCLVVCVNLCIVCLGAAVSSSSTRGTSATHSHHSSHTTS AAHSRSGSVSQRVTSSQTVSHGVNETIYNTTLKYGDVVGVNTTKYPYRVCSMAQGTDL IRFERNIVCTSMKPINEDLDEGIMVVYKRNIVAHTFKVRVYQKVLTFRRSYAYIHTTY LLGSNTEYVAPPMWEIHHINSHSQCYSSYSRVIAGTVFVAYHRDSYENKTMQLMPDDY SNTHSTRYVTVKDQWHSRGSTWLYRETCNLNCMVTITTARSKYPYHFFATSTGDVVDI SPFYNGTNRNASYFGENADKFFIFPNYTIVSDFGRPNSALETHRLVAFLERADSVISW DIQDEKNVTCQLTFWEASERTIRSEAEDSYHFSSAKMTATFLSKKQEVNMSDSALDCV …
84499	SNV	G	A	0.0276341	4	6	66.6667	1	11	9.09091		No	UL55	HHV5wtgp060	type 1 membrane protein; possible membrane fusogen; binds cell surface heparan sulphate; involved in cell entry; involved in cell-to-cell spread	envelope glycoprotein B	AAR31620.1	GI:39842076	MESRIWCLVVCVNLCIVCLGAAVSSSSTRGTSATHSHHSSHTTS AAHSRSGSVSQRVTSSQTVSHGVNETIYNTTLKYGDVVGVNTTKYPYRVCSMAQGTDL IRFERNIVCTSMKPINEDLDEGIMVVYKRNIVAHTFKVRVYQKVLTFRRSYAYIHTTY LLGSNTEYVAPPMWEIHHINSHSQCYSSYSRVIAGTVFVAYHRDSYENKTMQLMPDDY SNTHSTRYVTVKDQWHSRGSTWLYRETCNLNCMVTITTARSKYPYHFFATSTGDVVDI SPFYNGTNRNASYFGENADKFFIFPNYTIVSDFGRPNSALETHRLVAFLERADSVISW DIQDEKNVTCQLTFWEASERTIRSEAEDSYHFSSAKMTATFLSKKQEVNMSDSALDCV …
85892	SNV	A	C	0.0429864	5	6	83.3333	3	11	27.2727		No	UL56	HHV5wtgp061	involved in DNA encapsidation	DNA packaging terminase subunit 2	AAR31621.1	GI:39842077	MEMNLLQKLCVVCSKCNEYAMELECLKYCDPNVLLAESTPFKRN AAAIVYLYRKIYPEVVAQNRTQSSLLTLYLEMLLKALHEDTALLDRALMAYSRQPDRA AFYRTVLRLDRCDRHHTVELQFTDNVRFSVSLATLNDIERFLCKMNYVYGILAPEAGL EVCAQLLELLRRLCGISPVARQEVYVEGTTCAQCYEELTIIPNQGRSLNKRLQGLLCN HIAVHRPSSQSDVNIQTVEQDLLDLTTRIPHLAGVLSALKSLFSSSSAYHSYIQEAEE ALREYNLFTDIPERIYSLSDFTYWSRTSEVIVKRVGITIQQLNVYHQLCRALMNGISR HLYGEDVEDIFVLGEKALDGEERMFVGSVFAAPNRIIDLITSLSIQAFEDNPVFNKLH …
88654	SNV	C	T	0.0294118	3	6	50	0	11	0		No	UL57	HHV5wtgp062	contains zinc-finger; involved in DNA replication; possibly involved in gene regulation	single-stranded DNA-binding protein	AAR31622.1	GI:39842078	MSHEELTALAPVGPAAFLYFSRLNAETQEILATLSLCDRSSSVV IAPLLAGLTVEADFGVSVRTPVLCYDGGVLTKVTSFCPFALYFHHTQGIVAFTEDHGD VHRLCEDARQKYALEAYTPEADRVPTDLAALCAAVGCQASETTVHVVVGNGLKEFLFA GQLIPCVEEATTVRLHGGEAVRVPLYPPTLFNSLQLDAEADEVSLDARSAFVEARGLY VPAVSETLFYYVYTSWCQSLRFSEPRVLIEAALRQFVHDSQQSVKLAPHKRYLGYMSQ RLSSLEKDHLMLSDAVVCELAFSFASVFFDSAYQPAESMLFSEWPLVTNATDHRDLIR ALTELKLHLSTHVAALVFSANSVLYQHRLVYLQSSARHPSAGGTASQETLLKAIQFTN …
89068	SNV	A	G	0.0294118	3	6	50	0	11	0		No	UL57	HHV5wtgp062	contains zinc-finger; involved in DNA replication; possibly involved in gene regulation	single-stranded DNA-binding protein	AAR31622.1	GI:39842078	MSHEELTALAPVGPAAFLYFSRLNAETQEILATLSLCDRSSSVV IAPLLAGLTVEADFGVSVRTPVLCYDGGVLTKVTSFCPFALYFHHTQGIVAFTEDHGD VHRLCEDARQKYALEAYTPEADRVPTDLAALCAAVGCQASETTVHVVVGNGLKEFLFA GQLIPCVEEATTVRLHGGEAVRVPLYPPTLFNSLQLDAEADEVSLDARSAFVEARGLY VPAVSETLFYYVYTSWCQSLRFSEPRVLIEAALRQFVHDSQQSVKLAPHKRYLGYMSQ RLSSLEKDHLMLSDAVVCELAFSFASVFFDSAYQPAESMLFSEWPLVTNATDHRDLIR ALTELKLHLSTHVAALVFSANSVLYQHRLVYLQSSARHPSAGGTASQETLLKAIQFTN …
89128	SNV	A	G	0.0294118	3	6	50	0	11	0		No	UL57	HHV5wtgp062	contains zinc-finger; involved in DNA replication; possibly involved in gene regulation	single-stranded DNA-binding protein	AAR31622.1	GI:39842078	MSHEELTALAPVGPAAFLYFSRLNAETQEILATLSLCDRSSSVV IAPLLAGLTVEADFGVSVRTPVLCYDGGVLTKVTSFCPFALYFHHTQGIVAFTEDHGD VHRLCEDARQKYALEAYTPEADRVPTDLAALCAAVGCQASETTVHVVVGNGLKEFLFA GQLIPCVEEATTVRLHGGEAVRVPLYPPTLFNSLQLDAEADEVSLDARSAFVEARGLY VPAVSETLFYYVYTSWCQSLRFSEPRVLIEAALRQFVHDSQQSVKLAPHKRYLGYMSQ RLSSLEKDHLMLSDAVVCELAFSFASVFFDSAYQPAESMLFSEWPLVTNATDHRDLIR ALTELKLHLSTHVAALVFSANSVLYQHRLVYLQSSARHPSAGGTASQETLLKAIQFTN …
93035..93038	Deletion	GTGT	-	0.0294118	3	6	50	0	11	0		-
102462	SNV	A	G	0.0294118	3	6	50	0	11	0		No	UL70	HHV5wtgp064	involved in DNA replication	helicase-primase primase subunit	AAR31624.1	GI:39842080	MTLVLFATEYDSAHIVANVLSQTPTDHCVFPLLVKHQVSRRVYF CLQTQKCSDSRRVAPVFAVNNETLQLSRYLAARQPIPLSALIASLDEAETRPLYRHLF RTPVLSPEHGGEVREFKHLVYFHHAAVLRHLNQVFLCPTSPSWFISVFGHTEGQVLLT MAYYLFEGQYSTISTVEEYVRSFCTRDLGTIIPTHASMGEFARLLLGSPFRQRVSAFV AYAVARNRRDYTELEQVDTQINAFRERARLPDTVCVHYVYLAYRTALARARLLEYRRV VAYDADAAPEAQCTREPGFLGRRLSTELLDVMQKYFSLDNFLHDYVETHLLRLDESPH SATSPHGLGLAGYGGRIDGTHLAGFFGTSTQLARQLERINTLSESVFSPLERSLSGLL …
102774	SNV	C	T	0.0294118	3	6	50	0	11	0		No	UL70	HHV5wtgp064	involved in DNA replication	helicase-primase primase subunit	AAR31624.1	GI:39842080	MTLVLFATEYDSAHIVANVLSQTPTDHCVFPLLVKHQVSRRVYF CLQTQKCSDSRRVAPVFAVNNETLQLSRYLAARQPIPLSALIASLDEAETRPLYRHLF RTPVLSPEHGGEVREFKHLVYFHHAAVLRHLNQVFLCPTSPSWFISVFGHTEGQVLLT MAYYLFEGQYSTISTVEEYVRSFCTRDLGTIIPTHASMGEFARLLLGSPFRQRVSAFV AYAVARNRRDYTELEQVDTQINAFRERARLPDTVCVHYVYLAYRTALARARLLEYRRV VAYDADAAPEAQCTREPGFLGRRLSTELLDVMQKYFSLDNFLHDYVETHLLRLDESPH SATSPHGLGLAGYGGRIDGTHLAGFFGTSTQLARQLERINTLSESVFSPLERSLSGLL …
105784	SNV	C	T	0.0276341	4	6	66.6667	1	11	9.09091	AAR31724.1:p.Ala361Val	Yes	UL71	HHV5wtgp065	involved in virion morphogenesis	tegument protein UL51	AAR31724.1	GI:39842180	MQLAQRLCELLMCRRKAAPVADYVLLQPSEDVELRELQAFLDEN FKQLEITPADLRTFSRDTDVVNHLLKLLPLYRQCQSKCAFLKGYLSEGCLPHTRPAAE VECKKSQRILEALDILILKLVVGEFAMSEADSLEMLLDKFSTDQASLVEVQRVMGLVD MDCEKSAYMLEAGAAATVAPPTPPAVVQGESGVREDGETVAAVSAFACSSVSDSLIPE ETGVTRPMMSLAHINTVSCPTVMRFDQRLLEEGDEEDEVTVMSPSPEPVQQQPPVEPV QQQPQGRGSHRRRYKESAPQETLPTNHEREILDLMRHSPDVPREAVMSPTMVTIPPPQ IPFVGSARELRGVKKKKPTAAALLSSA
131887	SNV	C	T	0.0294118	3	6	50	0	11	0		No	UL87	HHV5wtgp081	promotes accumulation of late transcripts	protein UL87	AAR31639.1	GI:39842095	MAGAAPRRLGCDALIVVGGSAMPRRVLHVPVHVRACNLTQELST GEDARFCRPRPVNVERVRAVFAALYRACPIHVRTEPERVKLVLGRLLLGPVAVPCFCD GEVEGHGEHLVPTTQFCRGPLLYVHRRCCCGSVTAGRALSYHVLENHVATHVLRGLLS LTEWNRELPSLFCDCPGGGGASGTEERYAMACLPRDLSLHLDDYPYLMVEIGRVLSVS EVDDYVTAVSGYLGEAAAPRIQVHYKLLFGLNVRPQAPCALDATRDFFLLELQKLWLG VEYHHEVTSEFFGRVLAQLHRDRARVMMALRLPEQTVCHLSTFVLSRFKRQVLYFKLQ VSYGKCRTGHADRSGGGGNGGNQGHHNLLCYRRLSVTFADTDTVWRNLFYVYYELARD …
133569	SNV	C	T	0.0294118	3	6	50	0	11	0		No	UL88	HHV5wtgp082		tegument protein UL88	AAR31640.1	GI:39842096	MMEAAAAAAAAFRPEERPTPGWHDAALLMDDGTVREHAFRNGPL SQLIRRVLPPPPDAEDDVVFASELCFYCSGRFNRRSSVFSIYWQKHSDLVYALTGITH CAKLVVECGQLGSSRLRWRDGDASGEERRGDDDSRDELYDVPGIYMIRVNDGGSTGPR HVIWPGTSVLWAPDVVITTVQRRISAARALVNTFRQYFFLLERRSHEELVLCPPEMEE RLAPLLQSATRGDSDMFDGVVASAYHRLRMSNIPRSSARLLEHCVGLAGAKKLLLLDV PRLENYFLCQVCLYELDEDEMGEEMLGMLAGKPEDAAVSGASGGFLLHRKTMKLAACL CLLLNSLHLHQEALEALDPPPPRVEENDLVNVVLRRYYRSHGGVQARTLAAARALLAD …
133866	SNV	C	T	0.0294118	3	6	50	0	11	0		No	UL89	HHV5wtgp083	contains ATPase domain; involved in DNA encapsidation	DNA packaging terminase subunit 1	AAR31641.1	GI:39842097	MLRGDSAAKIQERYAELQKRKSHPTSCISTAFTNVAALCRKRYQ MMHPELGLAHSCNEAFLPLMAFCGRHRDYNSPEESQRELLFHERLKSALDELTFRPCS EEQRASYQKLDALTELYRDPQFQQINNFMTDFKKWLDGGFSTAVEGDAKAIRLEPFQK NLLIHVIFFIAVTKIPVLANRVLQYLIHAFQIDFLSQTSIDIFKQKATVFLVPRRHGK TWFIIPIISFLLKHMIGISIGYVAHQKHVSQFVLKEVEFRCRHTFARDYVVENKDNVI SIDHRGAKSTALFASCYNTNSIRGQNFHLLLVDEAHFIKKEAFNTILGFLAQNTTKII FISSTNTTSDATCFLTRLNNAPFDMLNVVSYVCEEHLHSFTEKGDATACPCYRLHKPT …
133980	SNV	G	A	0.0294118	3	6	50	0	11	0		No	UL89	HHV5wtgp083	contains ATPase domain; involved in DNA encapsidation	DNA packaging terminase subunit 1	AAR31641.1	GI:39842097	MLRGDSAAKIQERYAELQKRKSHPTSCISTAFTNVAALCRKRYQ MMHPELGLAHSCNEAFLPLMAFCGRHRDYNSPEESQRELLFHERLKSALDELTFRPCS EEQRASYQKLDALTELYRDPQFQQINNFMTDFKKWLDGGFSTAVEGDAKAIRLEPFQK NLLIHVIFFIAVTKIPVLANRVLQYLIHAFQIDFLSQTSIDIFKQKATVFLVPRRHGK TWFIIPIISFLLKHMIGISIGYVAHQKHVSQFVLKEVEFRCRHTFARDYVVENKDNVI SIDHRGAKSTALFASCYNTNSIRGQNFHLLLVDEAHFIKKEAFNTILGFLAQNTTKII FISSTNTTSDATCFLTRLNNAPFDMLNVVSYVCEEHLHSFTEKGDATACPCYRLHKPT …
134968	SNV	C	T	0.0294118	3	6	50	0	11	0		-
134975	SNV	G	T	0.0294118	3	6	50	0	11	0		-
155824	SNV	G	A	0.0294118	3	6	50	0	11	0		No	UL105	HHV5wtgp097	involved in DNA replication	helicase-primase helicase subunit	AAR31655.1	GI:39842111	MSMTASSSTPRPTPKYDDALILNLSSAAKIERIVDKVKSLSRER FAPEDFSFQWFRSISRVERTTDNNPSAATTAAATATVHSSVSSSAAAAASSEAGGTRV PCVDRWPFFPFRALLVTGTAGAGKTSSIQVLAANLDCVITGTTVIAAQNLSAILNRTR SAQVKTIYRVFGFVSKHVPLADSAVSHETLERYRVCEPHEETTIQRLQINDLLAYWPV IADIVDKCLNMWERKAASASAAAAAAACEDLSELCESNIIVIDECGLMLRYMLQVVVF FYYFYNALGDTRLYRERRVPCIICVGSPTQTEALESRYDHYTQNKSVRKGVDVLSALI QNEVLINYCDIADNWVMFIHNKRCTDLDFGDLLKYMEFGIPLKEEHVAYVDRFVRPPS …
155911	SNV	G	A	0.0294118	3	6	50	0	11	0		No	UL105	HHV5wtgp097	involved in DNA replication	helicase-primase helicase subunit	AAR31655.1	GI:39842111	MSMTASSSTPRPTPKYDDALILNLSSAAKIERIVDKVKSLSRER FAPEDFSFQWFRSISRVERTTDNNPSAATTAAATATVHSSVSSSAAAAASSEAGGTRV PCVDRWPFFPFRALLVTGTAGAGKTSSIQVLAANLDCVITGTTVIAAQNLSAILNRTR SAQVKTIYRVFGFVSKHVPLADSAVSHETLERYRVCEPHEETTIQRLQINDLLAYWPV IADIVDKCLNMWERKAASASAAAAAAACEDLSELCESNIIVIDECGLMLRYMLQVVVF FYYFYNALGDTRLYRERRVPCIICVGSPTQTEALESRYDHYTQNKSVRKGVDVLSALI QNEVLINYCDIADNWVMFIHNKRCTDLDFGDLLKYMEFGIPLKEEHVAYVDRFVRPPS …
156046	SNV	T	C	0.0294118	3	6	50	0	11	0		No	UL105	HHV5wtgp097	involved in DNA replication	helicase-primase helicase subunit	AAR31655.1	GI:39842111	MSMTASSSTPRPTPKYDDALILNLSSAAKIERIVDKVKSLSRER FAPEDFSFQWFRSISRVERTTDNNPSAATTAAATATVHSSVSSSAAAAASSEAGGTRV PCVDRWPFFPFRALLVTGTAGAGKTSSIQVLAANLDCVITGTTVIAAQNLSAILNRTR SAQVKTIYRVFGFVSKHVPLADSAVSHETLERYRVCEPHEETTIQRLQINDLLAYWPV IADIVDKCLNMWERKAASASAAAAAAACEDLSELCESNIIVIDECGLMLRYMLQVVVF FYYFYNALGDTRLYRERRVPCIICVGSPTQTEALESRYDHYTQNKSVRKGVDVLSALI QNEVLINYCDIADNWVMFIHNKRCTDLDFGDLLKYMEFGIPLKEEHVAYVDRFVRPPS …
156137	SNV	G	A	0.0294118	3	6	50	0	11	0		-
156289	SNV	C	T	0.0294118	3	6	50	0	11	0		-
156293	SNV	C	T	0.0294118	3	6	50	0	11	0		-
156588	SNV	C	A	0.0294118	3	6	50	0	11	0		-
159249^159250	Insertion	-	T	0.0276341	4	6	66.6667	1	11	9.09091		-
164228^164229	Insertion	-	TT	0.0276341	4	6	66.6667	1	11	9.09091		-
164316	SNV	G	A	0.0294118	3	6	50	0	11	0		No	UL114	HHV5wtgp100	involved in DNA repair	uracil-DNA glycosylase	AAR31658.1	GI:39842114	MALKQWMLANIADNKGSLLTPDEQARVFCLSADWIRFLSLPDHD TVLLRDTVAAVEGARQLEMVYPAPEHVHRWSYLCPPEQVRVVIVGQDPYCDGSASGLA FGTLAGRPPPPSLNNVFRELARTVDGFQRPASGCLDAWARRGVLLLNTVFTVVHGQPG SHRHLGWQTLSNHVIRRLSERREHLVFMLWGADAHTCEYLIDRRRHLVLKSCHPSPRN TTRAFVGNDHFILANAYLDTHYRETMDWRLCG
164391	SNV	G	A	0.0294118	3	6	50	0	11	0		No	UL114	HHV5wtgp100	involved in DNA repair	uracil-DNA glycosylase	AAR31658.1	GI:39842114	MALKQWMLANIADNKGSLLTPDEQARVFCLSADWIRFLSLPDHD TVLLRDTVAAVEGARQLEMVYPAPEHVHRWSYLCPPEQVRVVIVGQDPYCDGSASGLA FGTLAGRPPPPSLNNVFRELARTVDGFQRPASGCLDAWARRGVLLLNTVFTVVHGQPG SHRHLGWQTLSNHVIRRLSERREHLVFMLWGADAHTCEYLIDRRRHLVLKSCHPSPRN TTRAFVGNDHFILANAYLDTHYRETMDWRLCG
165448	SNV	C	T	0.0429864	5	6	83.3333	3	11	27.2727		No	UL115	HHV5wtgp101	contains signal peptide; complexed with envelope glycoprotein H; involved in cell entry; involved in cell-to-cell spread	envelope glycoprotein L	AAR31659.1	GI:39842115	MCRRPDCGFSFSPGPVILLWCCLLLPIVSSAAVSVAPTAAEKVP AECPELTRRCLLGEVFEGDKYESWLRPLVNVTGRDGPLSQLIRYRPVTPEAANSVLLD EAFLDTLALLYNNPDQLRALLTLLSSDTAPRWMTVMRGYSECGDGSPAVYTCVDDLCR GYDLTRLSYGRSIFTEHVLGFELVPPSLFNVVVAIRNEATRTNRAVRLPVSTAAAPEG ITLFYGLYNAVKEFCLRHQLDPPLLRHLDKYYAGLPPELKQTRVNLPAHSRYGPQAVD AR
165736	SNV	C	T	0.00630252	4	6	66.6667	0	11	0		No	UL115	HHV5wtgp101	contains signal peptide; complexed with envelope glycoprotein H; involved in cell entry; involved in cell-to-cell spread	envelope glycoprotein L	AAR31659.1	GI:39842115	MCRRPDCGFSFSPGPVILLWCCLLLPIVSSAAVSVAPTAAEKVP AECPELTRRCLLGEVFEGDKYESWLRPLVNVTGRDGPLSQLIRYRPVTPEAANSVLLD EAFLDTLALLYNNPDQLRALLTLLSSDTAPRWMTVMRGYSECGDGSPAVYTCVDDLCR GYDLTRLSYGRSIFTEHVLGFELVPPSLFNVVVAIRNEATRTNRAVRLPVSTAAAPEG ITLFYGLYNAVKEFCLRHQLDPPLLRHLDKYYAGLPPELKQTRVNLPAHSRYGPQAVD AR
165832	SNV	G	T	0.00630252	4	6	66.6667	0	11	0	AAR31659.1:p.Phe9Leu	Yes	UL115	HHV5wtgp101	contains signal peptide; complexed with envelope glycoprotein H; involved in cell entry; involved in cell-to-cell spread	envelope glycoprotein L	AAR31659.1	GI:39842115	MCRRPDCGFSFSPGPVILLWCCLLLPIVSSAAVSVAPTAAEKVP AECPELTRRCLLGEVFEGDKYESWLRPLVNVTGRDGPLSQLIRYRPVTPEAANSVLLD EAFLDTLALLYNNPDQLRALLTLLSSDTAPRWMTVMRGYSECGDGSPAVYTCVDDLCR GYDLTRLSYGRSIFTEHVLGFELVPPSLFNVVVAIRNEATRTNRAVRLPVSTAAAPEG ITLFYGLYNAVKEFCLRHQLDPPLLRHLDKYYAGLPPELKQTRVNLPAHSRYGPQAVD AR
166104	SNV	C	A	0.00630252	4	6	66.6667	0	11	0		No	UL116	HHV5wtgp102	contains signal peptide	protein UL116	AAR31660.1	GI:39842116	MKRRRRWRGWLLFLALCFCLLCEAVETNATTVTSTTAAAATTNT TVATTGTTTTSPNVTSTTSNTVTTPTTVSSVSNLTSSATSILISTSTVSGTRNTRNNN TTTIGTNATSPSSSVSILTTVTPAATSTTSNNGDVTSDYTPTFDLENITTTRAPTRPP AQDLCSHNLSIILYEEESQSSVDIAVDEEEPELEDDDEYDELWFPLYFEAECNLNYTL QYVNHSCDYSVRQSSVSFPPWRDIDSVTFVPRNLSNCSAHGLAVIVAGNQTWYVNPFS LAHLLDAIYNVLGIEDLSANFWRQLAPYRHTLIVPQT
166364	SNV	C	G	0.0294118	3	6	50	0	11	0	AAR31660.1:p.Asp146His	Yes	UL116	HHV5wtgp102	contains signal peptide	protein UL116	AAR31660.1	GI:39842116	MKRRRRWRGWLLFLALCFCLLCEAVETNATTVTSTTAAAATTNT TVATTGTTTTSPNVTSTTSNTVTTPTTVSSVSNLTSSATSILISTSTVSGTRNTRNNN TTTIGTNATSPSSSVSILTTVTPAATSTTSNNGDVTSDYTPTFDLENITTTRAPTRPP AQDLCSHNLSIILYEEESQSSVDIAVDEEEPELEDDDEYDELWFPLYFEAECNLNYTL QYVNHSCDYSVRQSSVSFPPWRDIDSVTFVPRNLSNCSAHGLAVIVAGNQTWYVNPFS LAHLLDAIYNVLGIEDLSANFWRQLAPYRHTLIVPQT
166396	SNV	C	T	0.0294118	3	6	50	0	11	0	AAR31660.1:p.Gly135Glu	Yes	UL116	HHV5wtgp102	contains signal peptide	protein UL116	AAR31660.1	GI:39842116	MKRRRRWRGWLLFLALCFCLLCEAVETNATTVTSTTAAAATTNT TVATTGTTTTSPNVTSTTSNTVTTPTTVSSVSNLTSSATSILISTSTVSGTRNTRNNN TTTIGTNATSPSSSVSILTTVTPAATSTTSNNGDVTSDYTPTFDLENITTTRAPTRPP AQDLCSHNLSIILYEEESQSSVDIAVDEEEPELEDDDEYDELWFPLYFEAECNLNYTL QYVNHSCDYSVRQSSVSFPPWRDIDSVTFVPRNLSNCSAHGLAVIVAGNQTWYVNPFS LAHLLDAIYNVLGIEDLSANFWRQLAPYRHTLIVPQT
166511..166513	Deletion	TTC	-	0.00630252	4	6	66.6667	0	11	0	AAR31660.1:p.Arg96del	Yes	UL116	HHV5wtgp102	contains signal peptide	protein UL116	AAR31660.1	GI:39842116	MKRRRRWRGWLLFLALCFCLLCEAVETNATTVTSTTAAAATTNT TVATTGTTTTSPNVTSTTSNTVTTPTTVSSVSNLTSSATSILISTSTVSGTRNTRNNN TTTIGTNATSPSSSVSILTTVTPAATSTTSNNGDVTSDYTPTFDLENITTTRAPTRPP AQDLCSHNLSIILYEEESQSSVDIAVDEEEPELEDDDEYDELWFPLYFEAECNLNYTL QYVNHSCDYSVRQSSVSFPPWRDIDSVTFVPRNLSNCSAHGLAVIVAGNQTWYVNPFS LAHLLDAIYNVLGIEDLSANFWRQLAPYRHTLIVPQT
166715..166716	MNV	CG	TA	0.00630252	4	6	66.6667	0	11	0	AAR31660.1:p.Ala29Thr	Yes	UL116	HHV5wtgp102	contains signal peptide	protein UL116	AAR31660.1	GI:39842116	MKRRRRWRGWLLFLALCFCLLCEAVETNATTVTSTTAAAATTNT TVATTGTTTTSPNVTSTTSNTVTTPTTVSSVSNLTSSATSILISTSTVSGTRNTRNNN TTTIGTNATSPSSSVSILTTVTPAATSTTSNNGDVTSDYTPTFDLENITTTRAPTRPP AQDLCSHNLSIILYEEESQSSVDIAVDEEEPELEDDDEYDELWFPLYFEAECNLNYTL QYVNHSCDYSVRQSSVSFPPWRDIDSVTFVPRNLSNCSAHGLAVIVAGNQTWYVNPFS LAHLLDAIYNVLGIEDLSANFWRQLAPYRHTLIVPQT
166874	SNV	C	T	0.0294118	3	6	50	0	11	0		No	UL117	HHV5wtgp103		protein UL117	AAR31661.1	GI:39842117	MVMFSQDHVQIVYGSTRICKSLAPANKRKTHRTIVVAPRRGFLR IPPDGQDVNHVKIVPTTTSSSLAPPRDDERRPTPPLRPPLTVYPYGTSLIRRSARDAK LRSKLIVFHITRPALGQHPQNPGISGPAAMDHSEFLTSFRREVDRQTVLTAESAPATV EVCLGDALPGGVMGGGGLPAGVGSASAAVAAAAAAVAGVPVAANPVMPATATVTTPPM IDLTSHHRPLTLFTPASAAAAPAVATNGGNATYILPADCRYAPLFASKYKYVFEEVSR LMRLHDSTAVQLQISASCGNAFQALKSALLKLHNVTVLAGQQLITQTMPHTPQAVATF KFFHQDPNRVLDCIRPVVPRSTSYHETGVYQMWVSGATKKDLFDAVTLCASIVEKQPD …
166994	SNV	C	T	0.0294118	3	6	50	0	11	0		No	UL117	HHV5wtgp103		protein UL117	AAR31661.1	GI:39842117	MVMFSQDHVQIVYGSTRICKSLAPANKRKTHRTIVVAPRRGFLR IPPDGQDVNHVKIVPTTTSSSLAPPRDDERRPTPPLRPPLTVYPYGTSLIRRSARDAK LRSKLIVFHITRPALGQHPQNPGISGPAAMDHSEFLTSFRREVDRQTVLTAESAPATV EVCLGDALPGGVMGGGGLPAGVGSASAAVAAAAAAVAGVPVAANPVMPATATVTTPPM IDLTSHHRPLTLFTPASAAAAPAVATNGGNATYILPADCRYAPLFASKYKYVFEEVSR LMRLHDSTAVQLQISASCGNAFQALKSALLKLHNVTVLAGQQLITQTMPHTPQAVATF KFFHQDPNRVLDCIRPVVPRSTSYHETGVYQMWVSGATKKDLFDAVTLCASIVEKQPD …
168100	SNV	G	C	0.0294118	3	6	50	0	11	0		-
168351	SNV	C	T	0.0294118	3	6	50	0	11	0		No	UL119	HHV5wtgp104	type 1 membrane protein; IgG Fc-binding; similar to OX-2; involved in immune regulation; possibly related to UL120 family	membrane glycoprotein UL119	AAR31662.1	GI:39842118	MCSVLAIALVVALLGDMHPGVKSSTTSAVTSPSNTTVTSTTSIS TSNNVSSAVTTTVQTSTSSASTSVIATTQKEGHLYTVNCEASYSYDQVSLNATCKVIL LNNTKNPDILSVTCYARTDCKGPFTQVGYLSAFPSNDKGKLHLSYNATAQELLISGLR PQETTEYTCSFFSWGRHHNATWDLFTYPIYAVYGTRLNATTMRVRVLLQEHEHCLLNG SSLYHPNSTVHLHQGDQLIPPWNISNVTYNGQRLREFVFYLNGTYTVVRLHVQIAGRS FTTTYVFIKSDPLFEDRLLAYGVLAFLVFMVIILLYVTYMLARRRDWSYKRLEEPVEE KKHPVPYFKQW
173741	SNV	T	C	0.0429864	5	6	83.3333	3	11	27.2727		No	UL122, UL123	HHV5wtgp107, HHV5wtgp108	interacts with basal transcriptional machinery and cellular transcription factors; specific DNA-binding protein; involved in gene regulation, enhances activation by IE2; interacts with basal transcriptional machinery and cellular transcription factor; disrupts ND10; involved in gene regulation	regulatory protein IE2, regulatory protein IE1	AAR31665.1, AAR31666.1	GI:39842121, GI:39842122	MESSAKRKMDPDNPDEGPSSKVPRPETPVTKATTFLQTMLRKEV NSQLSLGDPLFPELAEESLKTFEQVTEDCNENPEKDVLTELGDILAQAVNHAGIDSSS TGPTLTTHSCSVSSAPLNKPTPTSVAVTNTPLPGASATPELSPRKKPRKTTRPFKVII KPPVPPAPIMLPLIKQEDIKPEPDFTIQYRNKIIDTAGCIVISDSEEEQGEEVETRGA TASSPSTGSGTPRVTSPTHPLSQMNHPPLPDPLGRPDEDSSSSSSSSCSSASDSESES EEMKCSSGGGASVTSSHHGRGGFGGAASSSLLSCGHQSSGGASTGPRKKKSKRISELD NEKVRNIMKDKNTPFCTPNVQTRRGRVKIDEVSRMFRHTNRSLEYKNLPFMIPSMHQV …
174252	SNV	C	T	0.0169683	6	6	100	4	11	36.3636	AAR31667.1:p.Gln44*	Yes	UL124	HHV5wtgp109	type 1 membrane protein	membrane protein UL124	AAR31667.1	GI:39842123	MERNSLLVCQLLCLVARAAATSTAQTTLPSTVNSTATGVTSDSQ QNTTQLPASSAAALSLPSASAVQAHSPSSFSDTYPTATALCGTLVVVGIVLCLSLAST VRSKELPSDHEPLEAWEQGSDVEAPPLPEKSPCPEHVPEIRVEIPRYV
174254	SNV	A	T	0.0169683	6	6	100	4	11	36.3636	AAR31667.1:p.Gln44His	Yes	UL124	HHV5wtgp109	type 1 membrane protein	membrane protein UL124	AAR31667.1	GI:39842123	MERNSLLVCQLLCLVARAAATSTAQTTLPSTVNSTATGVTSDSQ QNTTQLPASSAAALSLPSASAVQAHSPSSFSDTYPTATALCGTLVVVGIVLCLSLAST VRSKELPSDHEPLEAWEQGSDVEAPPLPEKSPCPEHVPEIRVEIPRYV
174274	SNV	C	A	0.0294118	3	6	50	0	11	0	AAR31667.1:p.Pro51His	Yes	UL124	HHV5wtgp109	type 1 membrane protein	membrane protein UL124	AAR31667.1	GI:39842123	MERNSLLVCQLLCLVARAAATSTAQTTLPSTVNSTATGVTSDSQ QNTTQLPASSAAALSLPSASAVQAHSPSSFSDTYPTATALCGTLVVVGIVLCLSLAST VRSKELPSDHEPLEAWEQGSDVEAPPLPEKSPCPEHVPEIRVEIPRYV
174276	Deletion	G	-	0.0294118	3	6	50	0	11	0	AAR31667.1:p.Ala52fs	Yes	UL124	HHV5wtgp109	type 1 membrane protein	membrane protein UL124	AAR31667.1	GI:39842123	MERNSLLVCQLLCLVARAAATSTAQTTLPSTVNSTATGVTSDSQ QNTTQLPASSAAALSLPSASAVQAHSPSSFSDTYPTATALCGTLVVVGIVLCLSLAST VRSKELPSDHEPLEAWEQGSDVEAPPLPEKSPCPEHVPEIRVEIPRYV
174592	SNV	T	G	0.0294118	3	6	50	0	11	0		-
174601	SNV	T	C	0.0294118	3	6	50	0	11	0		-
179420	SNV	G	T	0.0294118	3	6	50	0	11	0		No	UL148	HHV5wtgp114	type 1 membrane protein	membrane protein UL148	AAR31672.1	GI:39842128	MLRLLFTLVLLALYGPSVDASRDYVHVRLLSYRGDPLVFKHTFS GVRRPFTELGWAACRDWDSMHCTPFWSTDLEQMTDSVRRYSTVSPGKEVTLQLHGNQT VQPSFLSFTCRLQLEPVVENVGLYVAYVVNDGERPQQFFTPQVDVVRFALYLETLSRI VEPLESGRLTVEFDTPDLALAPDLVSSLFVAGHGETDFYMNWTLRRSQTHYLEEMALQ VEILKPRGVRHRAIIHHPKLQPGVGLWIDFCVYRYNARLTRGYVRYTLSPKARLPAKA EGWLVSLDRFIVQYLNTLLITMMAAIWARVLITYLVSRRR
183180	SNV	G	A	0.0294118	3	6	50	0	11	0		-
183235	SNV	C	T	0.0294118	3	6	50	0	11	0		-
183323	SNV	T	C	0.0294118	3	6	50	0	11	0		-
183396	SNV	A	C	0.0294118	3	6	50	0	11	0		-
183402	SNV	A	G	0.0294118	3	6	50	0	11	0		-
183513	SNV	C	T	0.0294118	3	6	50	0	11	0	AAR31678.1:p.Val271Ile	Yes	UL142	HHV5wtgp120	type 1 membrane protein; similar to MHC-I; inhibits NK cell cytotoxicity; downregulates MICA; acts on activating receptor NKG2D; involved in immune regulation; MHC family	membrane glycoprotein UL142	AAR31678.1	GI:39842134	MRIEWACWLFGYFVSSVGSERSLSYRYHLESNSSANVVCNGNIS VFVNGTLGVRYNITVGISSSLLIGHLTIQTLESWFTPWVQNKSYSKQPLSTTETLYNI DSENIHRVSQYFHTRWIKSLQENHTCDLTNSTPTYTYQANVNNTNYLTLTSSGWQDRL NYTAINSTHFNLTESNITSIHKYLNTTCIERLRNYTLEPVYTTAVPQNVTPEHAITTL YTTPPNAITIKDTTQSHTVQTPSFNDTHNVTEHTLNISYVLSQKTNNTTSPWVYAIPM GATATIGAGLYIGKHFTPVKFVYEVWRGQ
183576	SNV	C	T	0.0294118	3	6	50	0	11	0	AAR31678.1:p.Glu250Lys	Yes	UL142	HHV5wtgp120	type 1 membrane protein; similar to MHC-I; inhibits NK cell cytotoxicity; downregulates MICA; acts on activating receptor NKG2D; involved in immune regulation; MHC family	membrane glycoprotein UL142	AAR31678.1	GI:39842134	MRIEWACWLFGYFVSSVGSERSLSYRYHLESNSSANVVCNGNIS VFVNGTLGVRYNITVGISSSLLIGHLTIQTLESWFTPWVQNKSYSKQPLSTTETLYNI DSENIHRVSQYFHTRWIKSLQENHTCDLTNSTPTYTYQANVNNTNYLTLTSSGWQDRL NYTAINSTHFNLTESNITSIHKYLNTTCIERLRNYTLEPVYTTAVPQNVTPEHAITTL YTTPPNAITIKDTTQSHTVQTPSFNDTHNVTEHTLNISYVLSQKTNNTTSPWVYAIPM GATATIGAGLYIGKHFTPVKFVYEVWRGQ
183662	SNV	G	A	0.0276341	4	6	66.6667	1	11	9.09091	AAR31678.1:p.Thr221Ile	Yes	UL142	HHV5wtgp120	type 1 membrane protein; similar to MHC-I; inhibits NK cell cytotoxicity; downregulates MICA; acts on activating receptor NKG2D; involved in immune regulation; MHC family	membrane glycoprotein UL142	AAR31678.1	GI:39842134	MRIEWACWLFGYFVSSVGSERSLSYRYHLESNSSANVVCNGNIS VFVNGTLGVRYNITVGISSSLLIGHLTIQTLESWFTPWVQNKSYSKQPLSTTETLYNI DSENIHRVSQYFHTRWIKSLQENHTCDLTNSTPTYTYQANVNNTNYLTLTSSGWQDRL NYTAINSTHFNLTESNITSIHKYLNTTCIERLRNYTLEPVYTTAVPQNVTPEHAITTL YTTPPNAITIKDTTQSHTVQTPSFNDTHNVTEHTLNISYVLSQKTNNTTSPWVYAIPM GATATIGAGLYIGKHFTPVKFVYEVWRGQ
183669	SNV	A	G	0.0276341	4	6	66.6667	1	11	9.09091	AAR31678.1:p.Tyr219His	Yes	UL142	HHV5wtgp120	type 1 membrane protein; similar to MHC-I; inhibits NK cell cytotoxicity; downregulates MICA; acts on activating receptor NKG2D; involved in immune regulation; MHC family	membrane glycoprotein UL142	AAR31678.1	GI:39842134	MRIEWACWLFGYFVSSVGSERSLSYRYHLESNSSANVVCNGNIS VFVNGTLGVRYNITVGISSSLLIGHLTIQTLESWFTPWVQNKSYSKQPLSTTETLYNI DSENIHRVSQYFHTRWIKSLQENHTCDLTNSTPTYTYQANVNNTNYLTLTSSGWQDRL NYTAINSTHFNLTESNITSIHKYLNTTCIERLRNYTLEPVYTTAVPQNVTPEHAITTL YTTPPNAITIKDTTQSHTVQTPSFNDTHNVTEHTLNISYVLSQKTNNTTSPWVYAIPM GATATIGAGLYIGKHFTPVKFVYEVWRGQ
183676	SNV	T	G	0.0169683	6	6	100	4	11	36.3636		No	UL142	HHV5wtgp120	type 1 membrane protein; similar to MHC-I; inhibits NK cell cytotoxicity; downregulates MICA; acts on activating receptor NKG2D; involved in immune regulation; MHC family	membrane glycoprotein UL142	AAR31678.1	GI:39842134	MRIEWACWLFGYFVSSVGSERSLSYRYHLESNSSANVVCNGNIS VFVNGTLGVRYNITVGISSSLLIGHLTIQTLESWFTPWVQNKSYSKQPLSTTETLYNI DSENIHRVSQYFHTRWIKSLQENHTCDLTNSTPTYTYQANVNNTNYLTLTSSGWQDRL NYTAINSTHFNLTESNITSIHKYLNTTCIERLRNYTLEPVYTTAVPQNVTPEHAITTL YTTPPNAITIKDTTQSHTVQTPSFNDTHNVTEHTLNISYVLSQKTNNTTSPWVYAIPM GATATIGAGLYIGKHFTPVKFVYEVWRGQ
183680	SNV	A	G	0.0169683	6	6	100	4	11	36.3636	AAR31678.1:p.Ile215Thr	Yes	UL142	HHV5wtgp120	type 1 membrane protein; similar to MHC-I; inhibits NK cell cytotoxicity; downregulates MICA; acts on activating receptor NKG2D; involved in immune regulation; MHC family	membrane glycoprotein UL142	AAR31678.1	GI:39842134	MRIEWACWLFGYFVSSVGSERSLSYRYHLESNSSANVVCNGNIS VFVNGTLGVRYNITVGISSSLLIGHLTIQTLESWFTPWVQNKSYSKQPLSTTETLYNI DSENIHRVSQYFHTRWIKSLQENHTCDLTNSTPTYTYQANVNNTNYLTLTSSGWQDRL NYTAINSTHFNLTESNITSIHKYLNTTCIERLRNYTLEPVYTTAVPQNVTPEHAITTL YTTPPNAITIKDTTQSHTVQTPSFNDTHNVTEHTLNISYVLSQKTNNTTSPWVYAIPM GATATIGAGLYIGKHFTPVKFVYEVWRGQ
183692^183693	Insertion	-	AT	0.0276341	4	6	66.6667	1	11	9.09091	AAR31678.1:p.Pro211fs	Yes	UL142	HHV5wtgp120	type 1 membrane protein; similar to MHC-I; inhibits NK cell cytotoxicity; downregulates MICA; acts on activating receptor NKG2D; involved in immune regulation; MHC family	membrane glycoprotein UL142	AAR31678.1	GI:39842134	MRIEWACWLFGYFVSSVGSERSLSYRYHLESNSSANVVCNGNIS VFVNGTLGVRYNITVGISSSLLIGHLTIQTLESWFTPWVQNKSYSKQPLSTTETLYNI DSENIHRVSQYFHTRWIKSLQENHTCDLTNSTPTYTYQANVNNTNYLTLTSSGWQDRL NYTAINSTHFNLTESNITSIHKYLNTTCIERLRNYTLEPVYTTAVPQNVTPEHAITTL YTTPPNAITIKDTTQSHTVQTPSFNDTHNVTEHTLNISYVLSQKTNNTTSPWVYAIPM GATATIGAGLYIGKHFTPVKFVYEVWRGQ
183693^183694	Insertion	-	T	0.0276341	4	6	66.6667	1	11	9.09091	AAR31678.1:p.Pro211fs	Yes	UL142	HHV5wtgp120	type 1 membrane protein; similar to MHC-I; inhibits NK cell cytotoxicity; downregulates MICA; acts on activating receptor NKG2D; involved in immune regulation; MHC family	membrane glycoprotein UL142	AAR31678.1	GI:39842134	MRIEWACWLFGYFVSSVGSERSLSYRYHLESNSSANVVCNGNIS VFVNGTLGVRYNITVGISSSLLIGHLTIQTLESWFTPWVQNKSYSKQPLSTTETLYNI DSENIHRVSQYFHTRWIKSLQENHTCDLTNSTPTYTYQANVNNTNYLTLTSSGWQDRL NYTAINSTHFNLTESNITSIHKYLNTTCIERLRNYTLEPVYTTAVPQNVTPEHAITTL YTTPPNAITIKDTTQSHTVQTPSFNDTHNVTEHTLNISYVLSQKTNNTTSPWVYAIPM GATATIGAGLYIGKHFTPVKFVYEVWRGQ
183724	SNV	C	T	0.0429864	5	6	83.3333	3	11	27.2727		No	UL142	HHV5wtgp120	type 1 membrane protein; similar to MHC-I; inhibits NK cell cytotoxicity; downregulates MICA; acts on activating receptor NKG2D; involved in immune regulation; MHC family	membrane glycoprotein UL142	AAR31678.1	GI:39842134	MRIEWACWLFGYFVSSVGSERSLSYRYHLESNSSANVVCNGNIS VFVNGTLGVRYNITVGISSSLLIGHLTIQTLESWFTPWVQNKSYSKQPLSTTETLYNI DSENIHRVSQYFHTRWIKSLQENHTCDLTNSTPTYTYQANVNNTNYLTLTSSGWQDRL NYTAINSTHFNLTESNITSIHKYLNTTCIERLRNYTLEPVYTTAVPQNVTPEHAITTL YTTPPNAITIKDTTQSHTVQTPSFNDTHNVTEHTLNISYVLSQKTNNTTSPWVYAIPM GATATIGAGLYIGKHFTPVKFVYEVWRGQ
183729	SNV	G	A	0.0276341	4	6	66.6667	1	11	9.09091	AAR31678.1:p.Pro199Ser	Yes	UL142	HHV5wtgp120	type 1 membrane protein; similar to MHC-I; inhibits NK cell cytotoxicity; downregulates MICA; acts on activating receptor NKG2D; involved in immune regulation; MHC family	membrane glycoprotein UL142	AAR31678.1	GI:39842134	MRIEWACWLFGYFVSSVGSERSLSYRYHLESNSSANVVCNGNIS VFVNGTLGVRYNITVGISSSLLIGHLTIQTLESWFTPWVQNKSYSKQPLSTTETLYNI DSENIHRVSQYFHTRWIKSLQENHTCDLTNSTPTYTYQANVNNTNYLTLTSSGWQDRL NYTAINSTHFNLTESNITSIHKYLNTTCIERLRNYTLEPVYTTAVPQNVTPEHAITTL YTTPPNAITIKDTTQSHTVQTPSFNDTHNVTEHTLNISYVLSQKTNNTTSPWVYAIPM GATATIGAGLYIGKHFTPVKFVYEVWRGQ
190570	SNV	G	A	0.0294118	3	6	50	0	11	0		No	UL133	HHV5wtgp127	contains potential transmembrane domain	protein UL133	AAR31685.1	GI:39842141	MGCDVHDPSWQCQWGVPTIIVAWITCAALGIWCLAGSSADVSSG PGIAAVVGCSVFMIFLCAYLIRYREFFKDSVIDLLTCRWVRYCSCSCKCSCKCISGPC SRCCSACYKETMIYDMVQYGHRRRPGHGDDPDRVICEIVESPPVSAPTVFVPPPSEES HQPVIPPQPPTPTSEPKPKKGRAKDKPKGRPKNKPPCEPTVSSQPPSQPTAMPGGPPD ASPPAMPQMPPGVAEAVQAAVQAAMAAALQQQQQHQTGT
192328	SNV	A	G	0.0429864	5	6	83.3333	3	11	27.2727		-
192440	SNV	G	A	0.0294118	3	6	50	0	11	0		No	UL150	HHV5wtgp132	contains signal peptide	protein UL150	AAR31690.1	GI:39842146	MLTLYLFTATCCFVCALPRQAQVDTAICHHTWPMCSDVPHPTSS AHNTALSSSHAISIEHRLLHSPSPPRENIRHSMRCRRRAIASSASTPVSHTQPLAANH RRSRITYATTDPTNSPTASPAKSDKLEADADPALHRRPDSLLRHLFQPCHAQRGTSNR ATSQRASLNAVHHKLCGAMISSSWSTTCTPAIMDLPSLSVELSAGHKKKETPTEGGWG GEEGEDDVLATIRNTLSAPTSPAAATTHRLSFPEGSSFCLTAVSEYSQRLTSTAALTP PPPAVAAPFSFSSTVSETGAFPQSTAGRTRVDDTAVVTAGDPRSPVTHVTLLQIFRLR SSLLTSRSGDTLRGGEHEAIPKVASLFWTLLKATQTVEITHKTPSADSHRNPQKYTDR …
192507	SNV	T	C	0.0169683	6	6	100	4	11	36.3636	AAR31690.1:p.Gln585Arg	Yes	UL150	HHV5wtgp132	contains signal peptide	protein UL150	AAR31690.1	GI:39842146	MLTLYLFTATCCFVCALPRQAQVDTAICHHTWPMCSDVPHPTSS AHNTALSSSHAISIEHRLLHSPSPPRENIRHSMRCRRRAIASSASTPVSHTQPLAANH RRSRITYATTDPTNSPTASPAKSDKLEADADPALHRRPDSLLRHLFQPCHAQRGTSNR ATSQRASLNAVHHKLCGAMISSSWSTTCTPAIMDLPSLSVELSAGHKKKETPTEGGWG GEEGEDDVLATIRNTLSAPTSPAAATTHRLSFPEGSSFCLTAVSEYSQRLTSTAALTP PPPAVAAPFSFSSTVSETGAFPQSTAGRTRVDDTAVVTAGDPRSPVTHVTLLQIFRLR SSLLTSRSGDTLRGGEHEAIPKVASLFWTLLKATQTVEITHKTPSADSHRNPQKYTDR …
192581	SNV	A	G	0.0276341	4	6	66.6667	1	11	9.09091		No	UL150	HHV5wtgp132	contains signal peptide	protein UL150	AAR31690.1	GI:39842146	MLTLYLFTATCCFVCALPRQAQVDTAICHHTWPMCSDVPHPTSS AHNTALSSSHAISIEHRLLHSPSPPRENIRHSMRCRRRAIASSASTPVSHTQPLAANH RRSRITYATTDPTNSPTASPAKSDKLEADADPALHRRPDSLLRHLFQPCHAQRGTSNR ATSQRASLNAVHHKLCGAMISSSWSTTCTPAIMDLPSLSVELSAGHKKKETPTEGGWG GEEGEDDVLATIRNTLSAPTSPAAATTHRLSFPEGSSFCLTAVSEYSQRLTSTAALTP PPPAVAAPFSFSSTVSETGAFPQSTAGRTRVDDTAVVTAGDPRSPVTHVTLLQIFRLR SSLLTSRSGDTLRGGEHEAIPKVASLFWTLLKATQTVEITHKTPSADSHRNPQKYTDR …
192598	SNV	T	C	0.0276341	4	6	66.6667	1	11	9.09091	AAR31690.1:p.Thr555Ala	Yes	UL150	HHV5wtgp132	contains signal peptide	protein UL150	AAR31690.1	GI:39842146	MLTLYLFTATCCFVCALPRQAQVDTAICHHTWPMCSDVPHPTSS AHNTALSSSHAISIEHRLLHSPSPPRENIRHSMRCRRRAIASSASTPVSHTQPLAANH RRSRITYATTDPTNSPTASPAKSDKLEADADPALHRRPDSLLRHLFQPCHAQRGTSNR ATSQRASLNAVHHKLCGAMISSSWSTTCTPAIMDLPSLSVELSAGHKKKETPTEGGWG GEEGEDDVLATIRNTLSAPTSPAAATTHRLSFPEGSSFCLTAVSEYSQRLTSTAALTP PPPAVAAPFSFSSTVSETGAFPQSTAGRTRVDDTAVVTAGDPRSPVTHVTLLQIFRLR SSLLTSRSGDTLRGGEHEAIPKVASLFWTLLKATQTVEITHKTPSADSHRNPQKYTDR …
192602	SNV	C	G	0.0276341	4	6	66.6667	1	11	9.09091	AAR31690.1:p.Lys553Asn	Yes	UL150	HHV5wtgp132	contains signal peptide	protein UL150	AAR31690.1	GI:39842146	MLTLYLFTATCCFVCALPRQAQVDTAICHHTWPMCSDVPHPTSS AHNTALSSSHAISIEHRLLHSPSPPRENIRHSMRCRRRAIASSASTPVSHTQPLAANH RRSRITYATTDPTNSPTASPAKSDKLEADADPALHRRPDSLLRHLFQPCHAQRGTSNR ATSQRASLNAVHHKLCGAMISSSWSTTCTPAIMDLPSLSVELSAGHKKKETPTEGGWG GEEGEDDVLATIRNTLSAPTSPAAATTHRLSFPEGSSFCLTAVSEYSQRLTSTAALTP PPPAVAAPFSFSSTVSETGAFPQSTAGRTRVDDTAVVTAGDPRSPVTHVTLLQIFRLR SSLLTSRSGDTLRGGEHEAIPKVASLFWTLLKATQTVEITHKTPSADSHRNPQKYTDR …
195136	SNV	G	T	0.0276341	4	6	66.6667	1	11	9.09091		-
195146	SNV	T	C	0.0276341	4	6	66.6667	1	11	9.09091		-
195151	Replacement	C	GTG	0.0276341	4	6	66.6667	1	11	9.09091		-
195155^195156	Insertion	-	GG	0.0276341	4	6	66.6667	1	11	9.09091		-
195159	SNV	G	T	0.0276341	4	6	66.6667	1	11	9.09091		-
195178..195179	MNV	CC	TG	0.0276341	4	6	66.6667	1	11	9.09091		-
218360	SNV	C	T	0.0429864	5	6	83.3333	3	11	27.2727		No	US23	HHV5wtgp154	US22 family	protein US23	AAR31712.1	GI:39842168	MWRTRWEDGAPTFTRNDEFLYCHTRYETFLRVMGDFQGIFECQY SADVLRDWVRNHVDQVLSLGIPHNWFLQVRPGSTMPELRDQLLDDVICCPERLIVLGK CVIMVDDHYEETELVLCMGGGTRLYIYEPSQEILLLCARHLDELARYGMMYTEAVYRQ PQTPFATRVPHDVVAMLLRHGHDTDALAACVGEHHGRDVNFHTPGRHAKTLKLLTSFG CLTDCWPFEVAPAARLAECEMYVTLQLRCRWYLLGAVGSYRAGGFFDTSFLIIFDRFC RFYVVIVKSHLDRSPPLQRLAGEIYRLADSLEELFRAGLMKVYVRRRYEHGLRRAARL ERNGGCVHMGEAARLHFTMFDSGVDRDYARQFRWLCRGDRFRAEMLNNWDGWDAFTIW …
219707	SNV	G	A	0.0429864	5	6	83.3333	3	11	27.2727		No	US23	HHV5wtgp154	US22 family	protein US23	AAR31712.1	GI:39842168	MWRTRWEDGAPTFTRNDEFLYCHTRYETFLRVMGDFQGIFECQY SADVLRDWVRNHVDQVLSLGIPHNWFLQVRPGSTMPELRDQLLDDVICCPERLIVLGK CVIMVDDHYEETELVLCMGGGTRLYIYEPSQEILLLCARHLDELARYGMMYTEAVYRQ PQTPFATRVPHDVVAMLLRHGHDTDALAACVGEHHGRDVNFHTPGRHAKTLKLLTSFG CLTDCWPFEVAPAARLAECEMYVTLQLRCRWYLLGAVGSYRAGGFFDTSFLIIFDRFC RFYVVIVKSHLDRSPPLQRLAGEIYRLADSLEELFRAGLMKVYVRRRYEHGLRRAARL ERNGGCVHMGEAARLHFTMFDSGVDRDYARQFRWLCRGDRFRAEMLNNWDGWDAFTIW …
221391	SNV	G	A	0.0294118	3	6	50	0	11	0		-
221430	SNV	C	T	0.0294118	3	6	50	0	11	0		-
222009	SNV	T	C	0.0373303	6	6	100	5	11	45.4545	AAR31714.1:p.Thr587Ala	Yes	US26	HHV5wtgp156	US22 family	protein US26	AAR31714.1	GI:39842170	MRQSYRYASGAVVRRTLKGLRKLILCQDLRQDIRHLVRSYADMN ISLPVSAPPGWRLDFVEFEDIFGSAAVTDGPETPWGQLICCEESLESLGVLQFSTTVL PRVHGPRSSSEDEDSDDDDFFVYVEEIEPPSQARLVLLLGRYETVWCLDRDCGVLYYL AHSLDDFARHGLLHCEAIYGEQMRTPLLTTQPDHIICDLRLHDNSISELQRVTCRYRG ECVPLRTPGEMTRPLLLCGQAENLKGVWPFICMETEQFNDLLKFFVDRLCCETMIMGV VGESLPSGVFHADFVILVDRACEFFYFDVSRREIWRLADSVDMLLTVGLLKIYQAGRR FHYAVDDAERLEVPGRCPHENFPFWDRFGTVERVRASTRHHELRYKWLIRKDRFIVRP …
222847	SNV	T	C	0.0429864	5	6	83.3333	3	11	27.2727		No	US26	HHV5wtgp156	US22 family	protein US26	AAR31714.1	GI:39842170	MRQSYRYASGAVVRRTLKGLRKLILCQDLRQDIRHLVRSYADMN ISLPVSAPPGWRLDFVEFEDIFGSAAVTDGPETPWGQLICCEESLESLGVLQFSTTVL PRVHGPRSSSEDEDSDDDDFFVYVEEIEPPSQARLVLLLGRYETVWCLDRDCGVLYYL AHSLDDFARHGLLHCEAIYGEQMRTPLLTTQPDHIICDLRLHDNSISELQRVTCRYRG ECVPLRTPGEMTRPLLLCGQAENLKGVWPFICMETEQFNDLLKFFVDRLCCETMIMGV VGESLPSGVFHADFVILVDRACEFFYFDVSRREIWRLADSVDMLLTVGLLKIYQAGRR FHYAVDDAERLEVPGRCPHENFPFWDRFGTVERVRASTRHHELRYKWLIRKDRFIVRP …
223252	SNV	C	T	0.0276341	4	6	66.6667	1	11	9.09091		No	US26	HHV5wtgp156	US22 family	protein US26	AAR31714.1	GI:39842170	MRQSYRYASGAVVRRTLKGLRKLILCQDLRQDIRHLVRSYADMN ISLPVSAPPGWRLDFVEFEDIFGSAAVTDGPETPWGQLICCEESLESLGVLQFSTTVL PRVHGPRSSSEDEDSDDDDFFVYVEEIEPPSQARLVLLLGRYETVWCLDRDCGVLYYL AHSLDDFARHGLLHCEAIYGEQMRTPLLTTQPDHIICDLRLHDNSISELQRVTCRYRG ECVPLRTPGEMTRPLLLCGQAENLKGVWPFICMETEQFNDLLKFFVDRLCCETMIMGV VGESLPSGVFHADFVILVDRACEFFYFDVSRREIWRLADSVDMLLTVGLLKIYQAGRR FHYAVDDAERLEVPGRCPHENFPFWDRFGTVERVRASTRHHELRYKWLIRKDRFIVRP …
223264	SNV	C	T	0.0175339	5	6	83.3333	2	11	18.1818		No	US26	HHV5wtgp156	US22 family	protein US26	AAR31714.1	GI:39842170	MRQSYRYASGAVVRRTLKGLRKLILCQDLRQDIRHLVRSYADMN ISLPVSAPPGWRLDFVEFEDIFGSAAVTDGPETPWGQLICCEESLESLGVLQFSTTVL PRVHGPRSSSEDEDSDDDDFFVYVEEIEPPSQARLVLLLGRYETVWCLDRDCGVLYYL AHSLDDFARHGLLHCEAIYGEQMRTPLLTTQPDHIICDLRLHDNSISELQRVTCRYRG ECVPLRTPGEMTRPLLLCGQAENLKGVWPFICMETEQFNDLLKFFVDRLCCETMIMGV VGESLPSGVFHADFVILVDRACEFFYFDVSRREIWRLADSVDMLLTVGLLKIYQAGRR FHYAVDDAERLEVPGRCPHENFPFWDRFGTVERVRASTRHHELRYKWLIRKDRFIVRP …
224459	SNV	C	T	0.0276341	4	6	66.6667	1	11	9.09091		No	US27	HHV5wtgp157	type 3 membrane protein; 7 transmembrane domains; putative chemokine receptor; possibly involved in intracellular signalling; GPCR family	envelope glycoprotein US27	AAR31715.1	GI:39842171	MTTSTTTTTNIMLQVSNVTNHTLNSTEIYQLFEYTRFGVWLMCI VGTFLNMLVITTILYYRRKKKSPSDTYICNLAVADLLIVVGLPFFLEYAKHHPKLSRE VVCSGLNACFYICLFAGVCFLINLSMDRYCVIVWGVELNRVRNNKRATCWVVIFWILA ALMGMPHYLMYSHTNNECVGEFANETSGWFPVFLNTKVNICGYLAPIVLMAYTYNRMV RFIINYVGKWHMQTLHVLLVVVVSFASFWFPFNLALFLESIRLLSGTQNETLQTVITF CLYVGQFLAYVRACLNPGIYILVGTQMRKDMWTTLRVFACCCVKQEIPYQDIDIELQK DIQRRAKHTKRTHYDRKHAPMESGEEEFLL
224618	SNV	C	T	0.0276341	4	6	66.6667	1	11	9.09091		No	US27	HHV5wtgp157	type 3 membrane protein; 7 transmembrane domains; putative chemokine receptor; possibly involved in intracellular signalling; GPCR family	envelope glycoprotein US27	AAR31715.1	GI:39842171	MTTSTTTTTNIMLQVSNVTNHTLNSTEIYQLFEYTRFGVWLMCI VGTFLNMLVITTILYYRRKKKSPSDTYICNLAVADLLIVVGLPFFLEYAKHHPKLSRE VVCSGLNACFYICLFAGVCFLINLSMDRYCVIVWGVELNRVRNNKRATCWVVIFWILA ALMGMPHYLMYSHTNNECVGEFANETSGWFPVFLNTKVNICGYLAPIVLMAYTYNRMV RFIINYVGKWHMQTLHVLLVVVVSFASFWFPFNLALFLESIRLLSGTQNETLQTVITF CLYVGQFLAYVRACLNPGIYILVGTQMRKDMWTTLRVFACCCVKQEIPYQDIDIELQK DIQRRAKHTKRTHYDRKHAPMESGEEEFLL
225014	SNV	G	A	0.0294118	3	6	50	0	11	0		No	US27	HHV5wtgp157	type 3 membrane protein; 7 transmembrane domains; putative chemokine receptor; possibly involved in intracellular signalling; GPCR family	envelope glycoprotein US27	AAR31715.1	GI:39842171	MTTSTTTTTNIMLQVSNVTNHTLNSTEIYQLFEYTRFGVWLMCI VGTFLNMLVITTILYYRRKKKSPSDTYICNLAVADLLIVVGLPFFLEYAKHHPKLSRE VVCSGLNACFYICLFAGVCFLINLSMDRYCVIVWGVELNRVRNNKRATCWVVIFWILA ALMGMPHYLMYSHTNNECVGEFANETSGWFPVFLNTKVNICGYLAPIVLMAYTYNRMV RFIINYVGKWHMQTLHVLLVVVVSFASFWFPFNLALFLESIRLLSGTQNETLQTVITF CLYVGQFLAYVRACLNPGIYILVGTQMRKDMWTTLRVFACCCVKQEIPYQDIDIELQK DIQRRAKHTKRTHYDRKHAPMESGEEEFLL
225539	SNV	T	C	0.0175339	5	6	83.3333	2	11	18.1818		No	US28	HHV5wtgp158	type 3 membrane protein; 7 transmembrane domains; broad spectrum CC chemokine receptor; constitutive signalling; mediates cellular migration; involved in intracellular signalling; GPCR family	envelope protein US28	AAR31716.1	GI:39842172	MTPTTTTAELTTEFDYDEDATPCVFTDVLNQSKPVTLFLYGVVF LFGSIGNFLVIFTITWRRRIQCSGDVYFINLAAADLLFVCTLPLWMQYLLDHNSLASV PCTLLTACFYVAMFASLCFITEIALDRYYAIVYMRYRPVKQACLFSIFWWIFAVIIAI PHFMVVTKKDNQCMTDYDYLEVSYPIILNVELMLGAFVIPLSVISYCYYRISRIVAVS QSRHKGRIVRVLIAVVLVFIIFWLPYHLTLFVDTLKLLKWISSSCEFERSLKRALILT ESLAFCHCCLNPLLYVFVGTKFRQELHCLLAEFRQRLFSRDVSWYHSMSFSRRGSPSR RETSSDTLSDEVCRVSQIIP
230409	SNV	G	A	0.0294118	3	6	50	0	11	0		No	US33A	HHV5wtgr006		protein US33A	AEJ33670.1	GI:338970390	MSLRFPERAGYEKLGYRPHAKRVWVHDPLGLTRFIMRQLMMYPL VLPFTFPFYVPRS
